# Supplementary material
Source: PubMed Central journal article supplement (PMC3279184)

# Enantioselective Cyclizations of Silyloxyenynes Catalyzed by Cationic Metal Phosphine Complexes

Jean-François Brazeau, Suyan Zhang, Ignacio Colomer, Britton K. Corkey, F. Dean Toste\*

*Department of Chemistry, University of California, Berkeley, California 94720*

## Supporting Information (Part B)

NMR Spectra ( $^1\text{H}$  and  $^{13}\text{C}$ )

S-1 to S-76

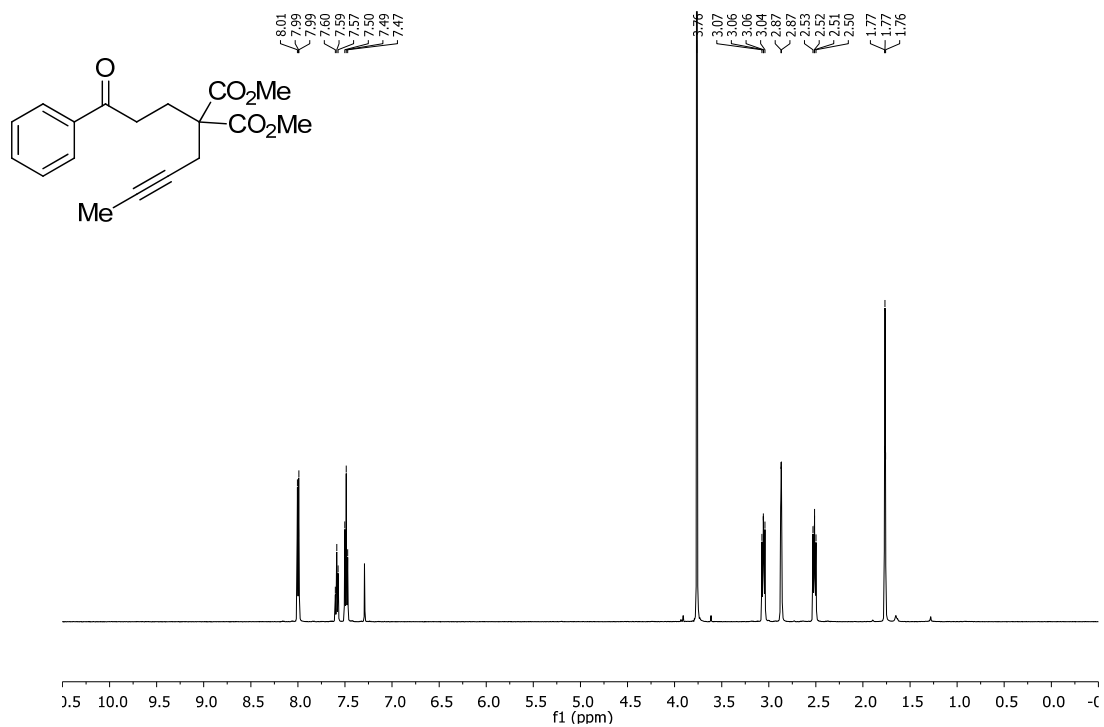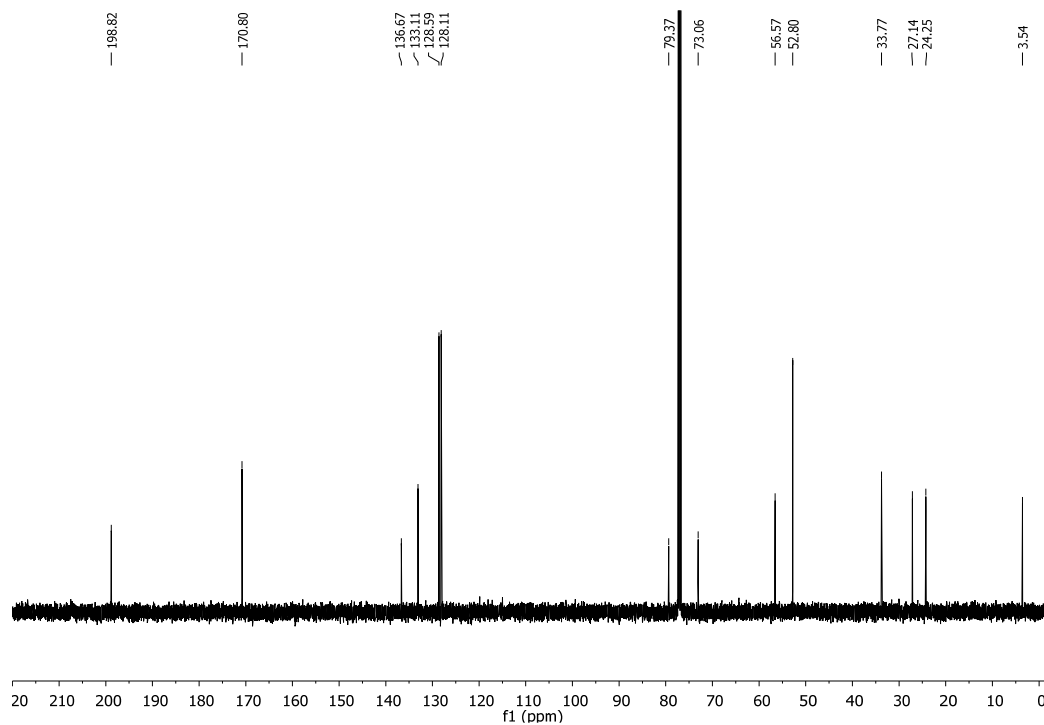

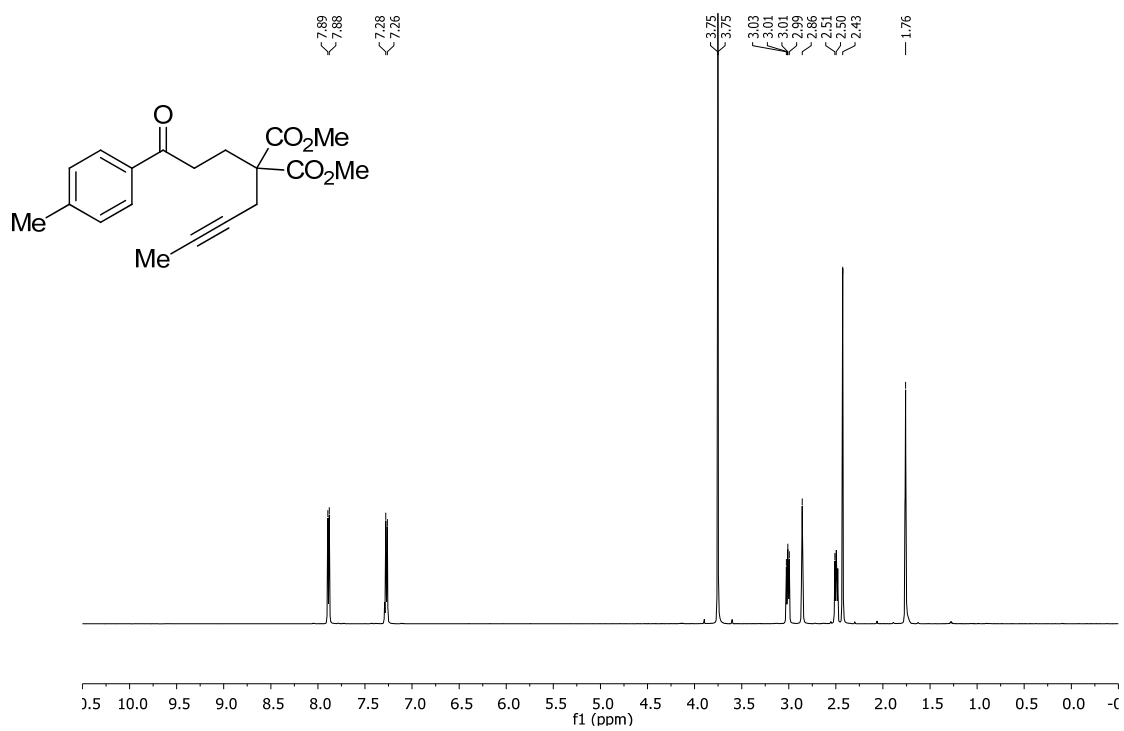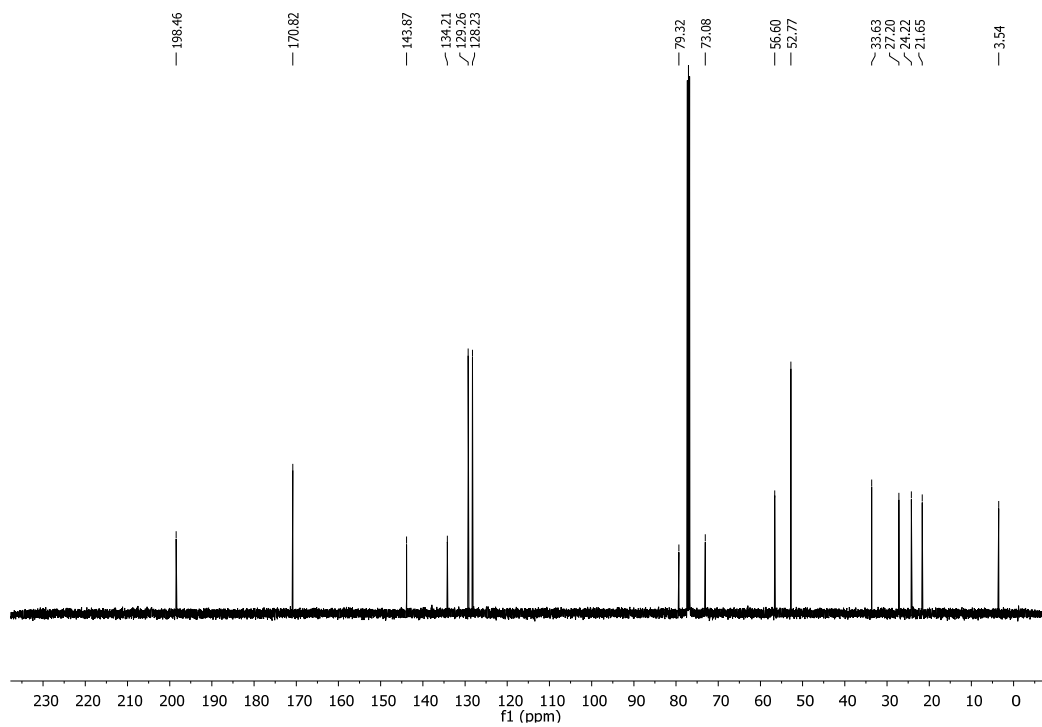

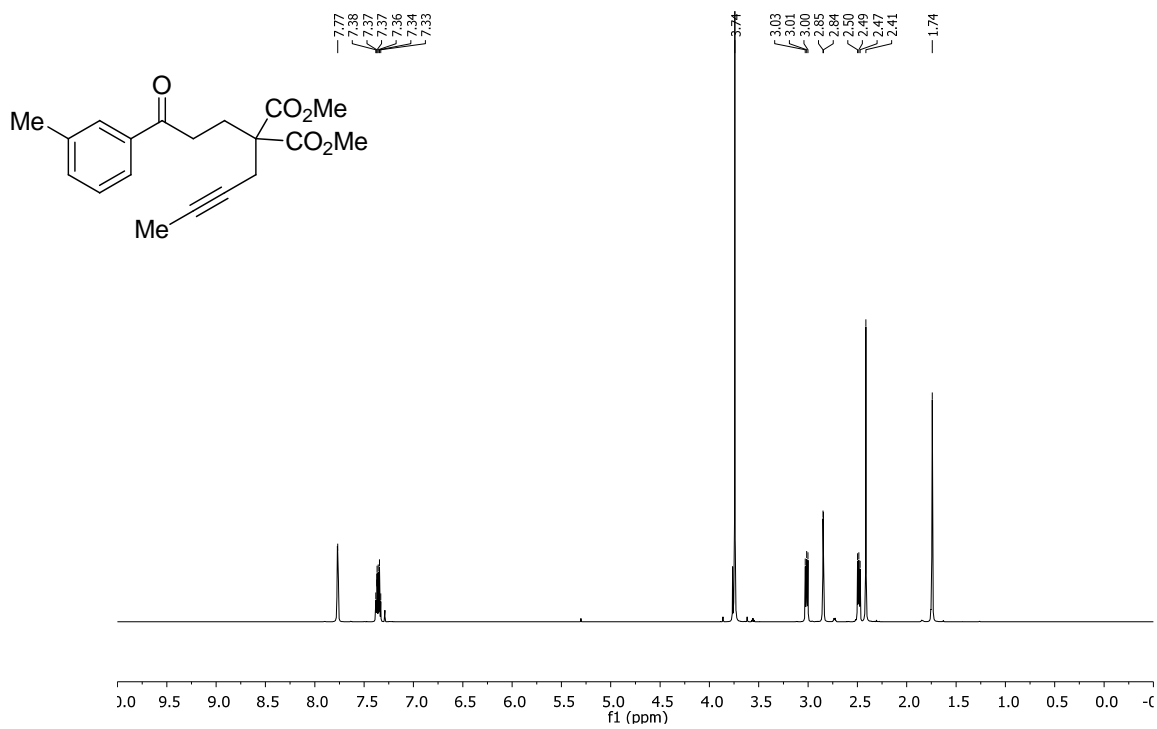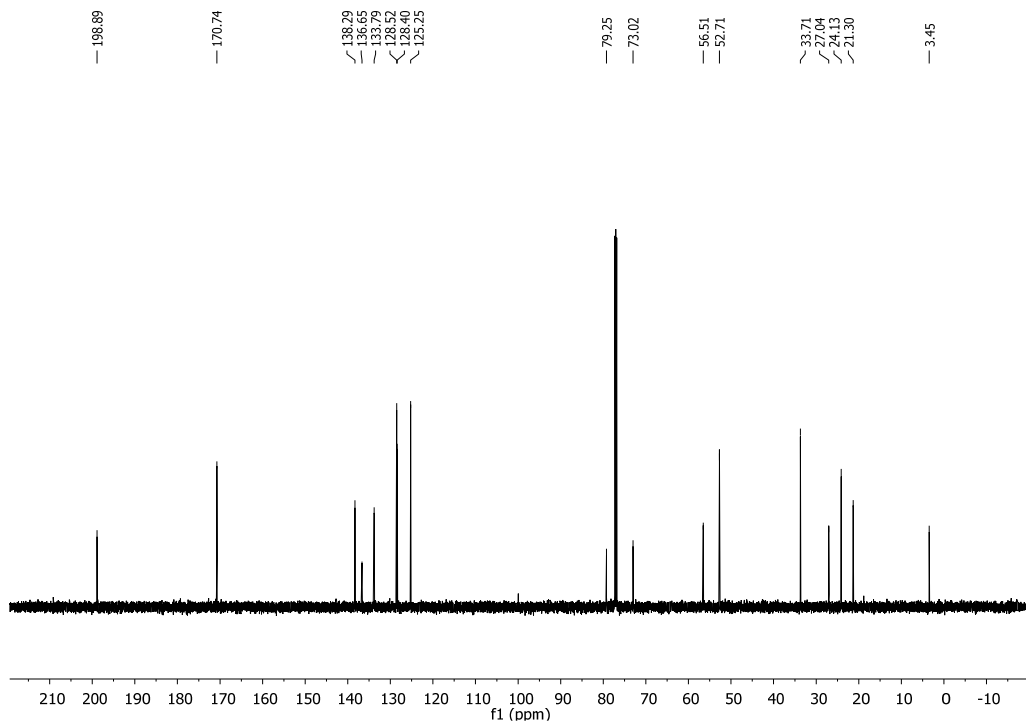

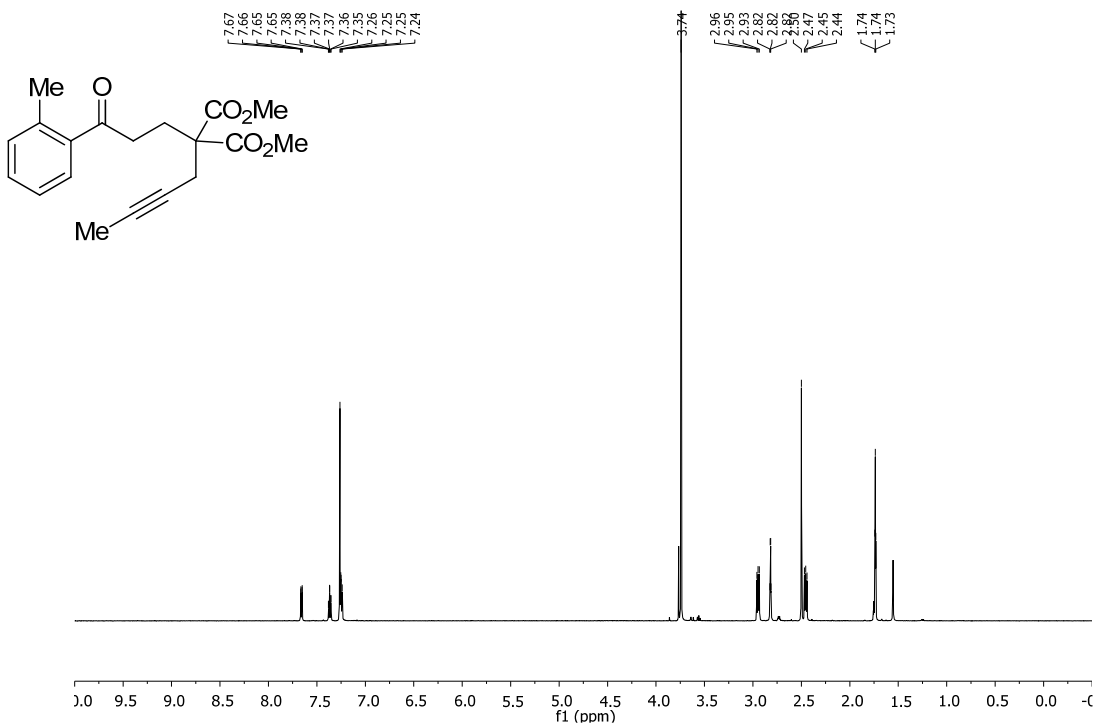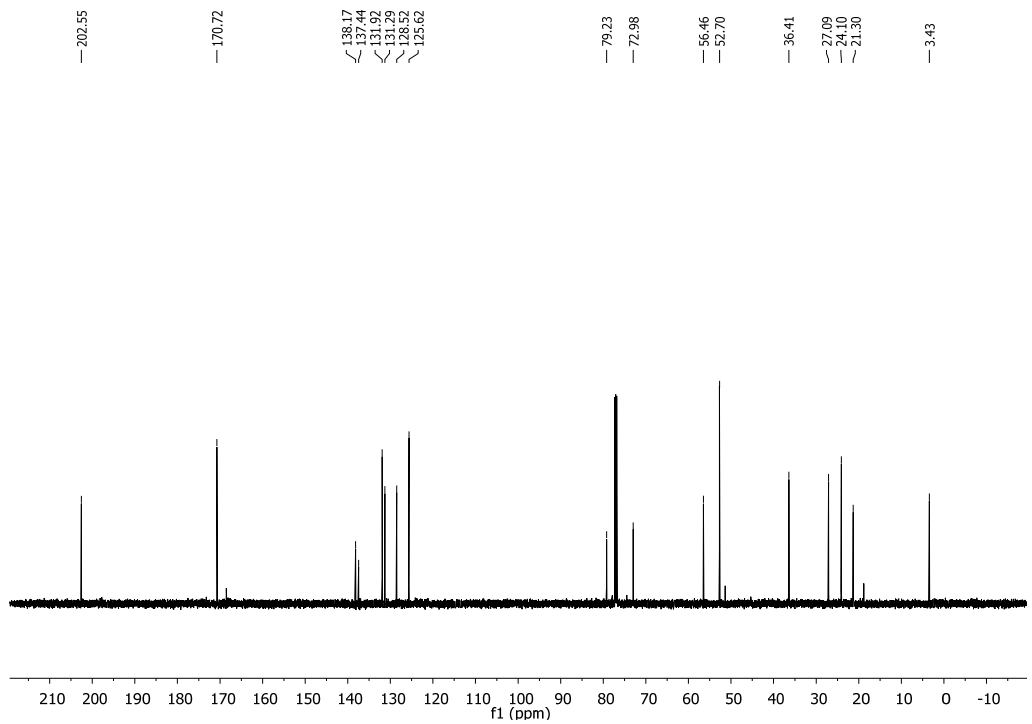

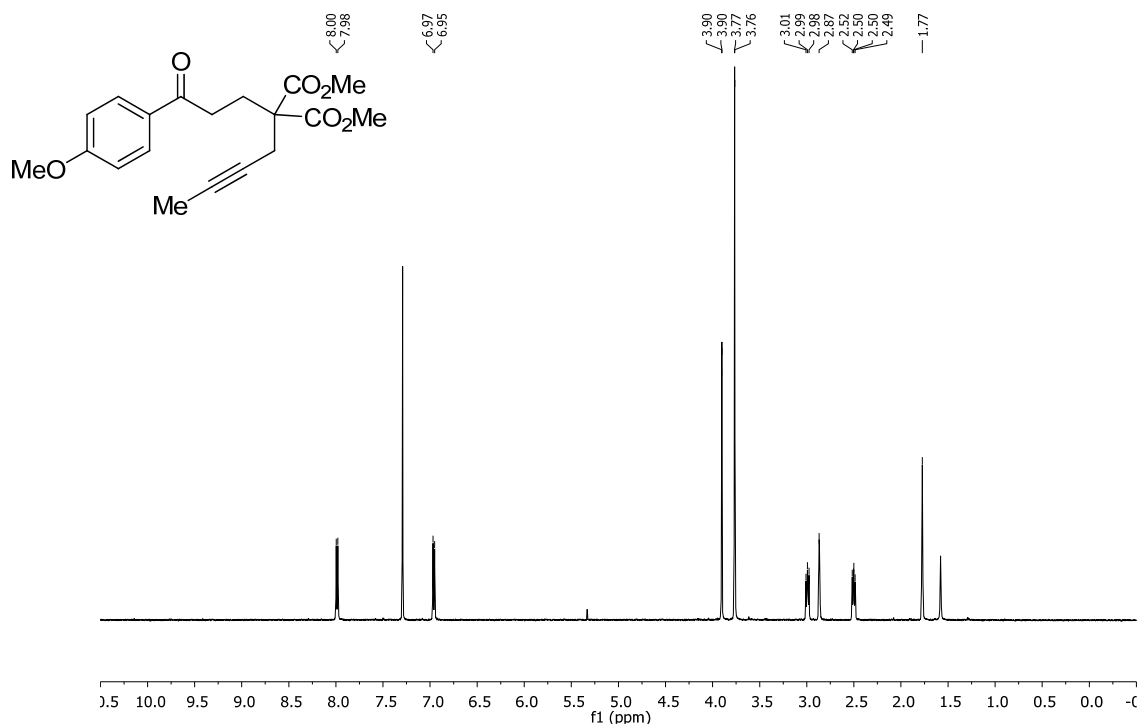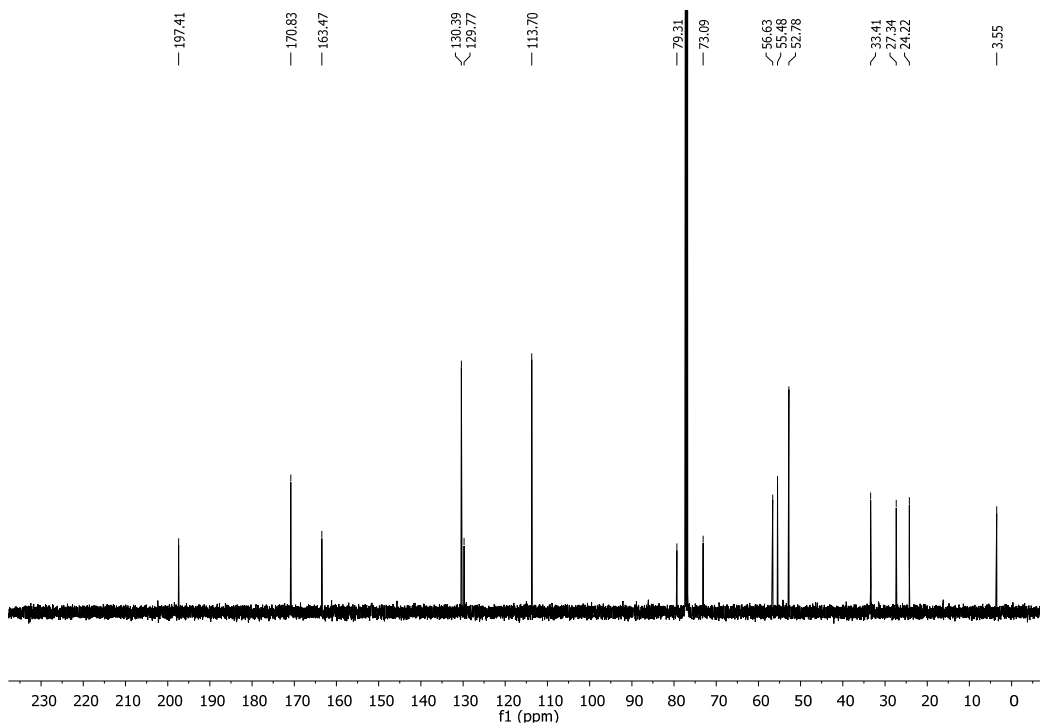

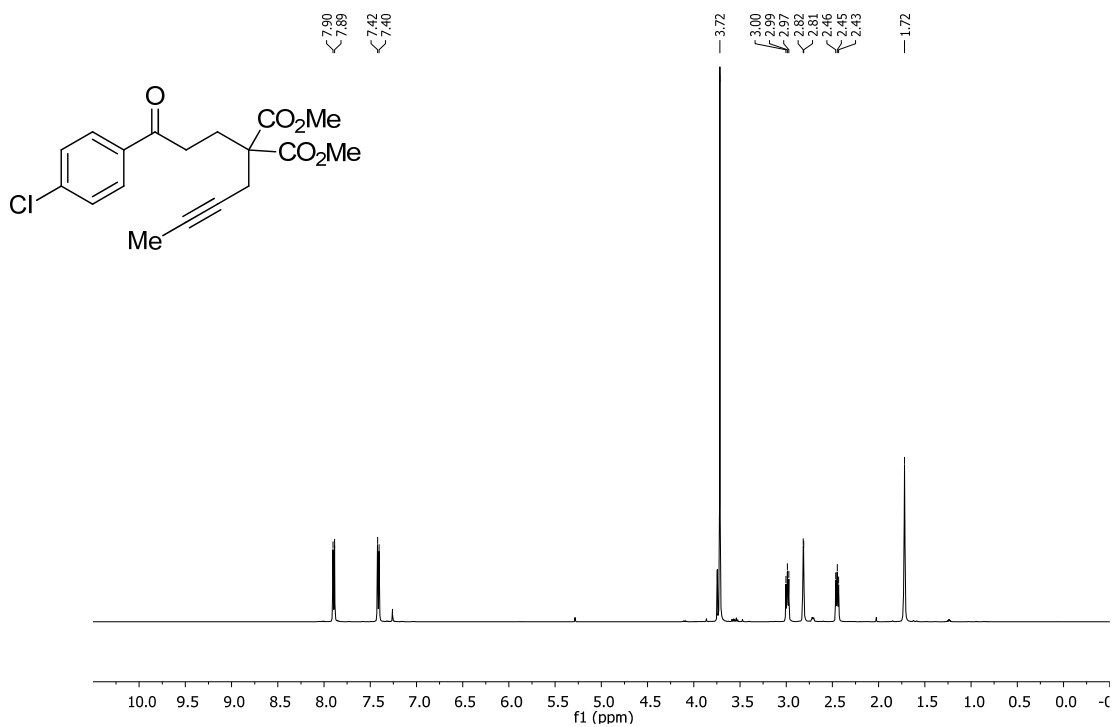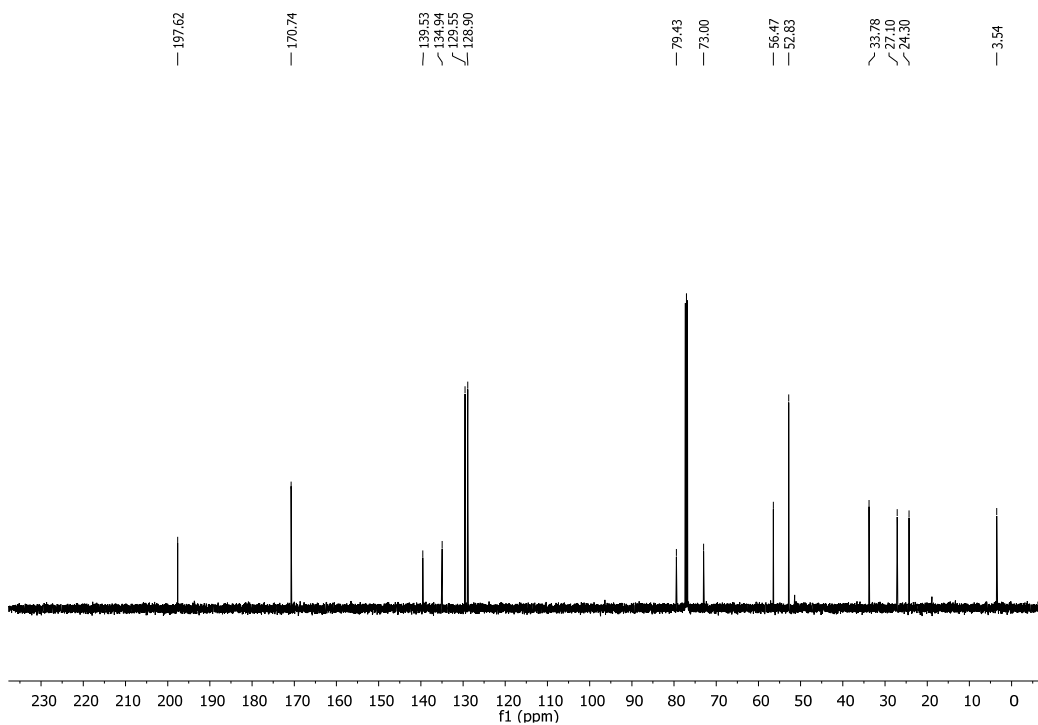

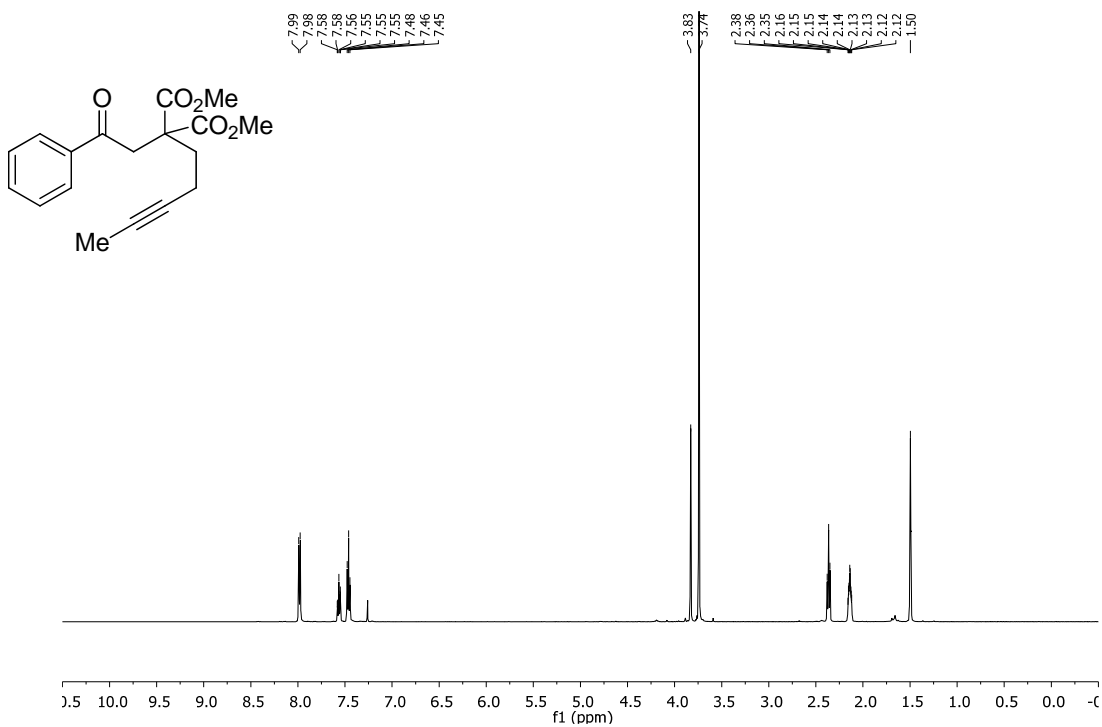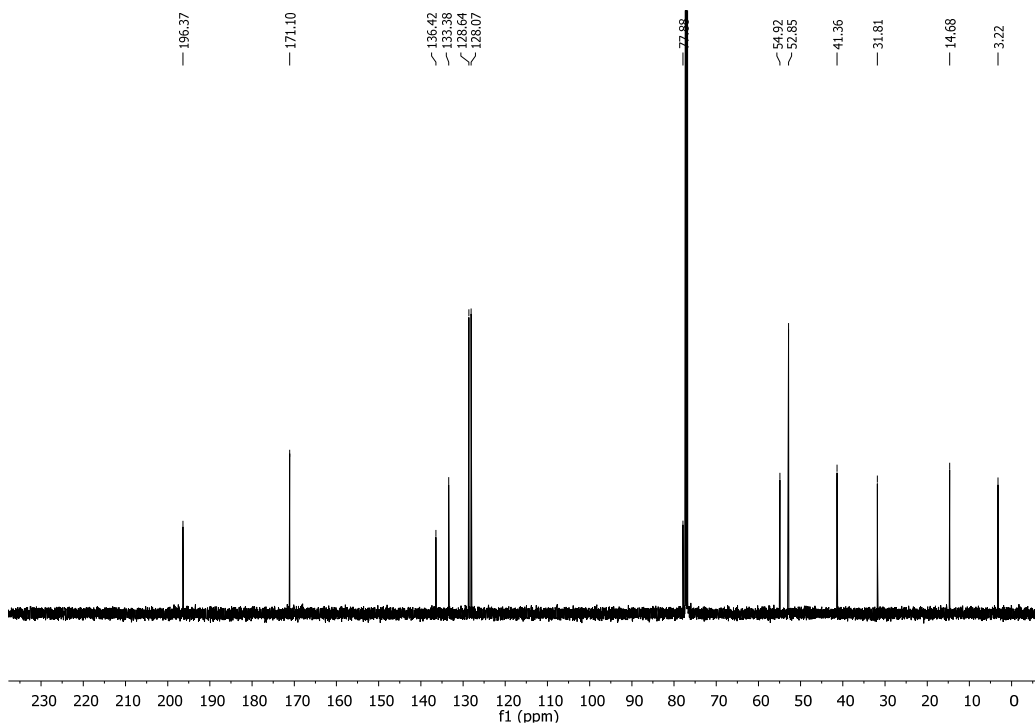



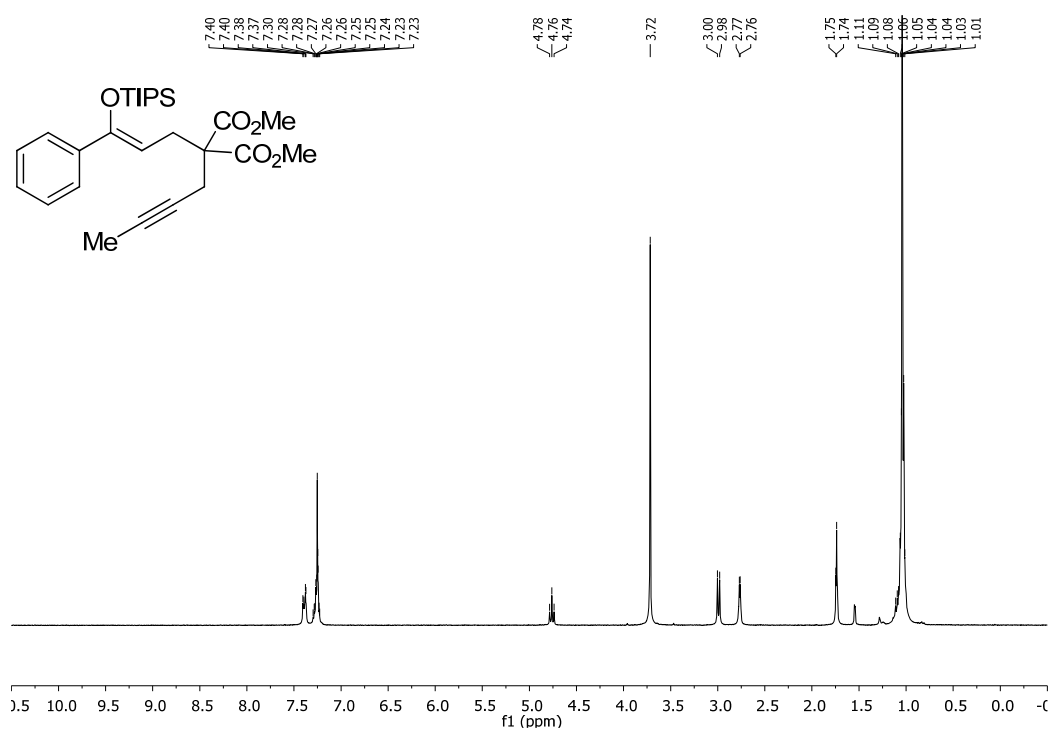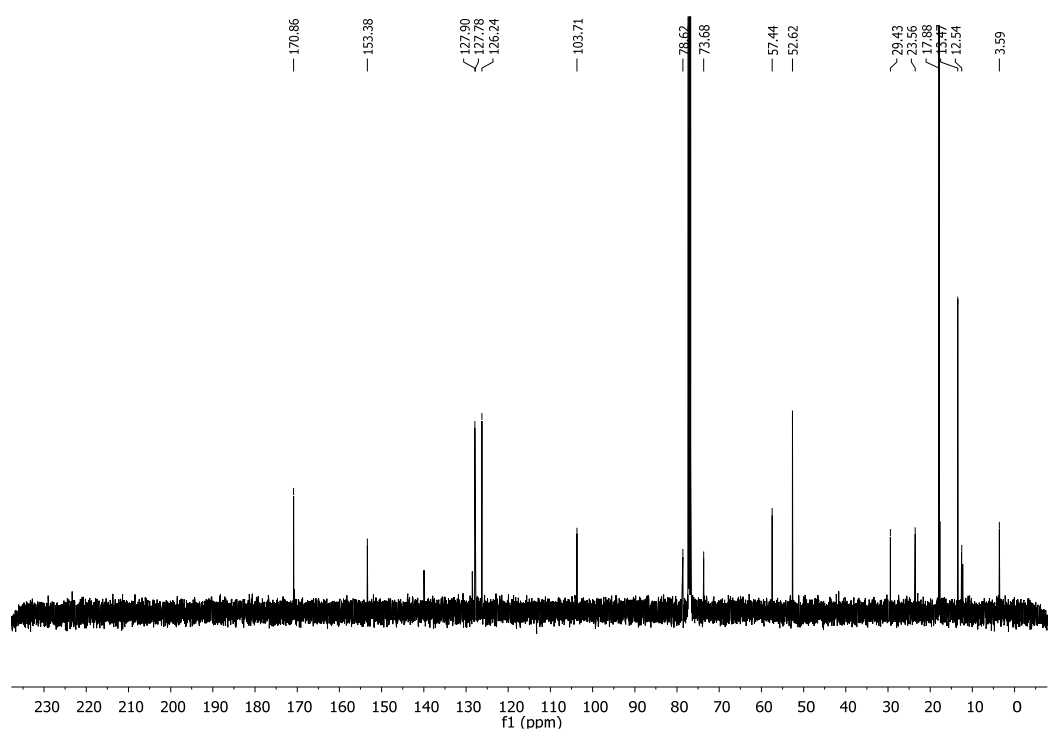

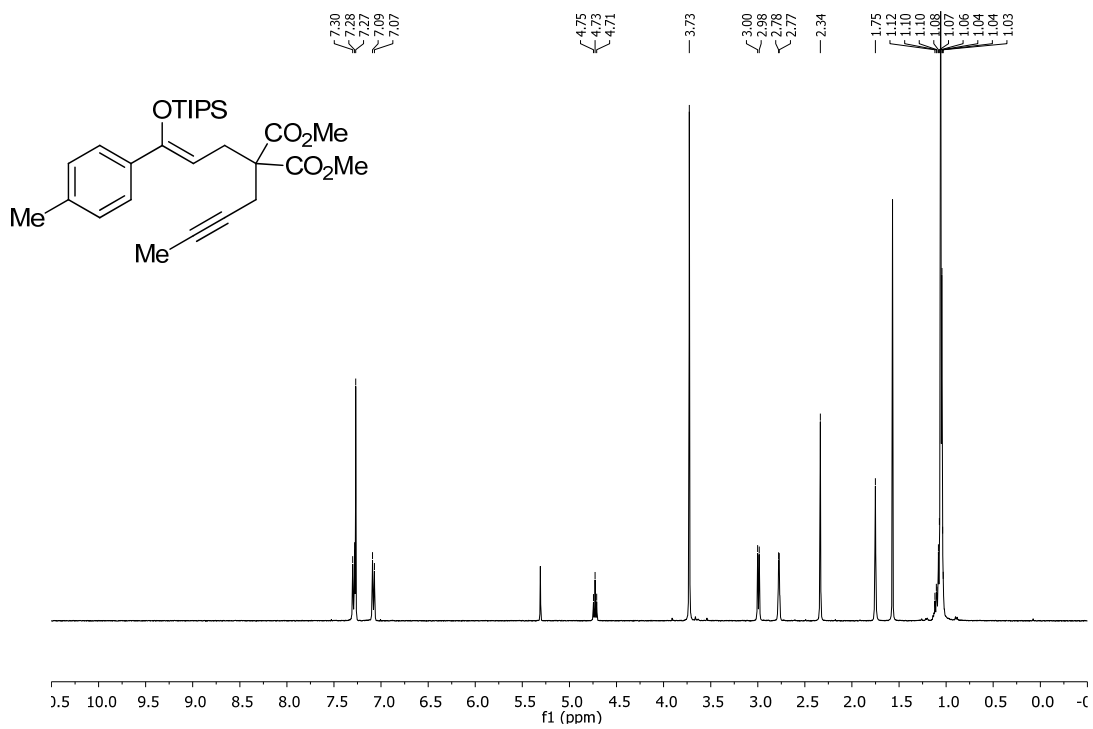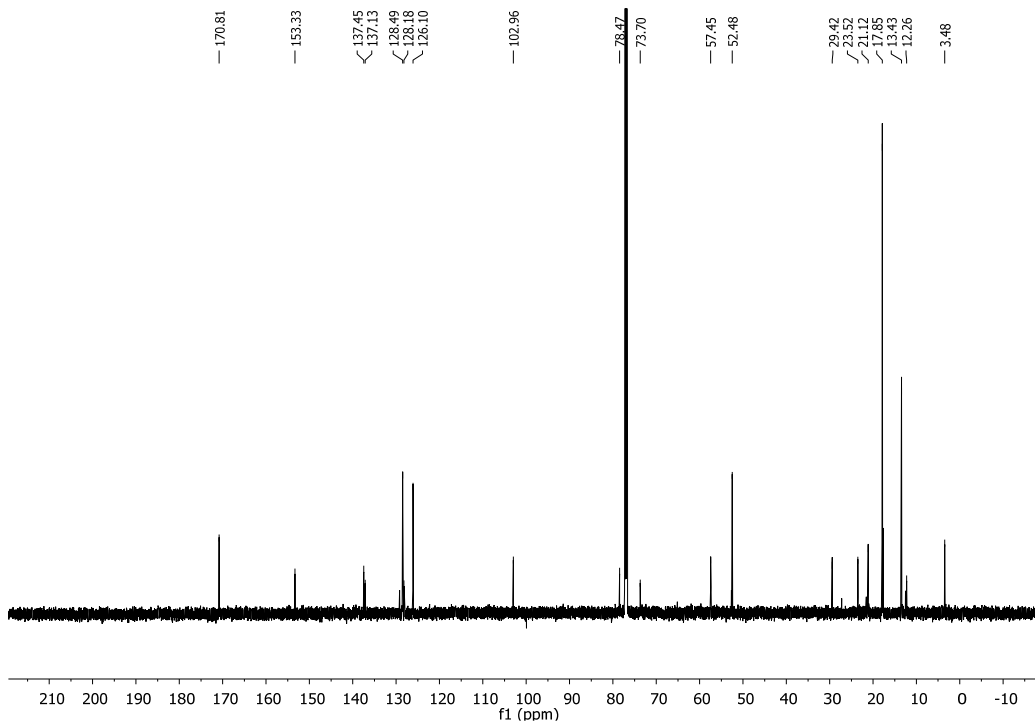

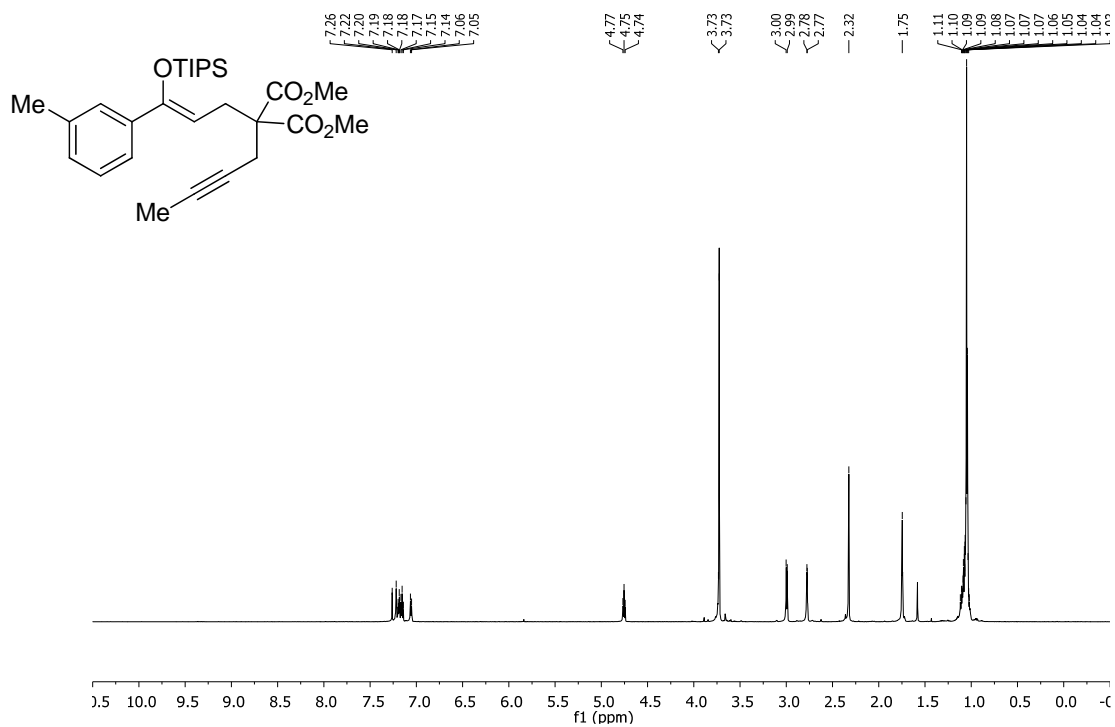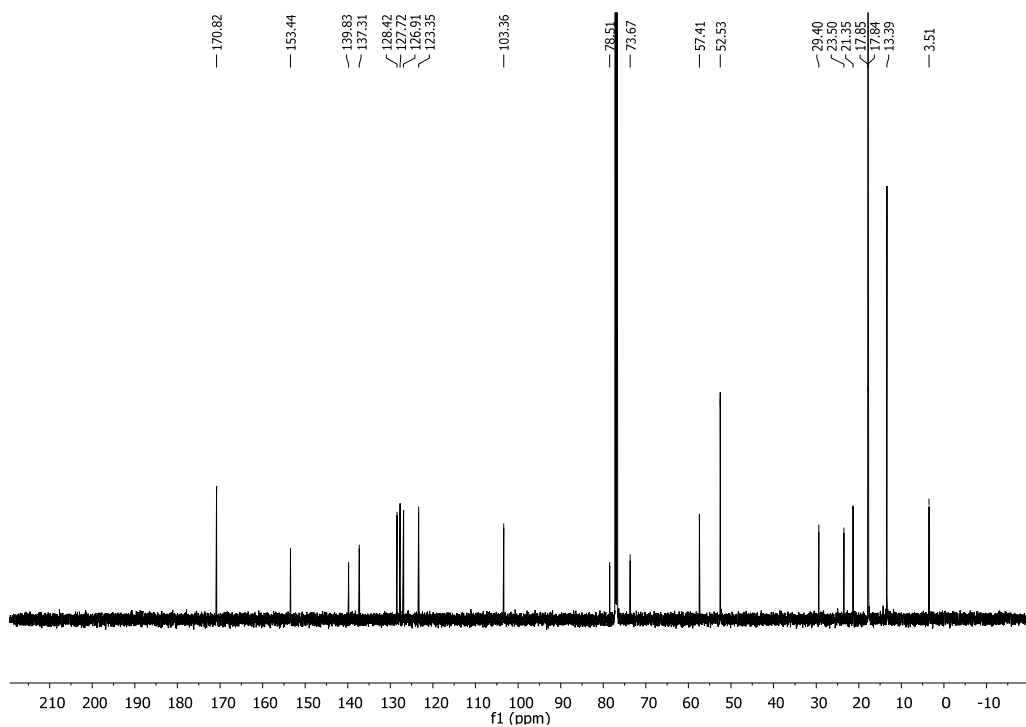



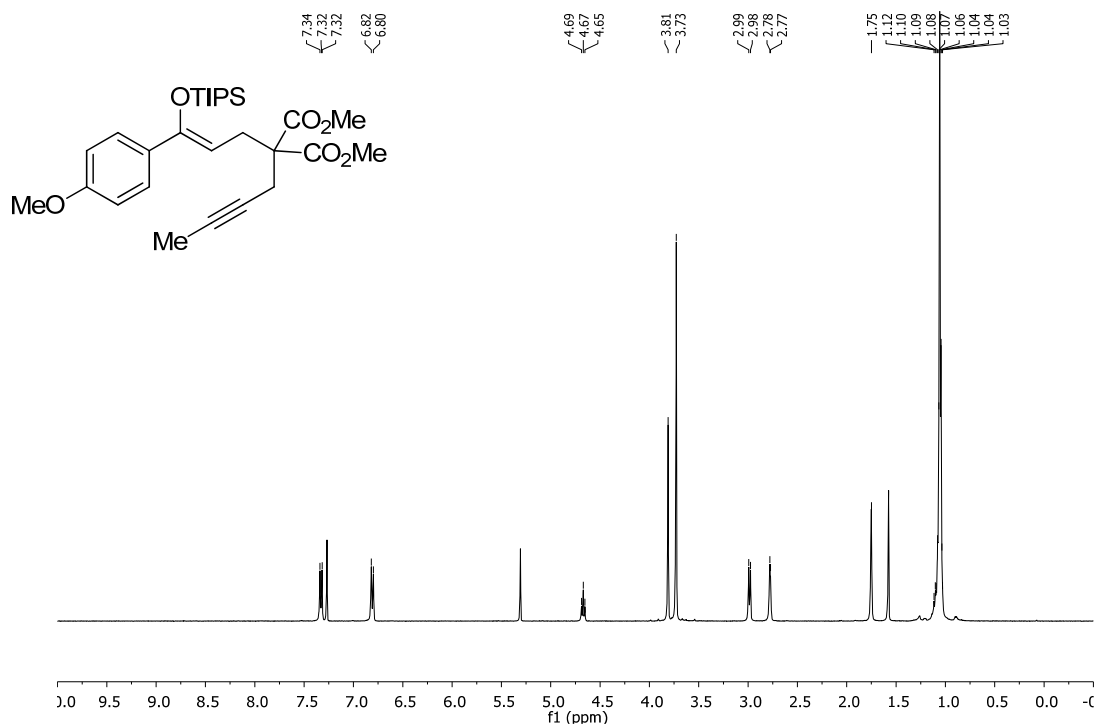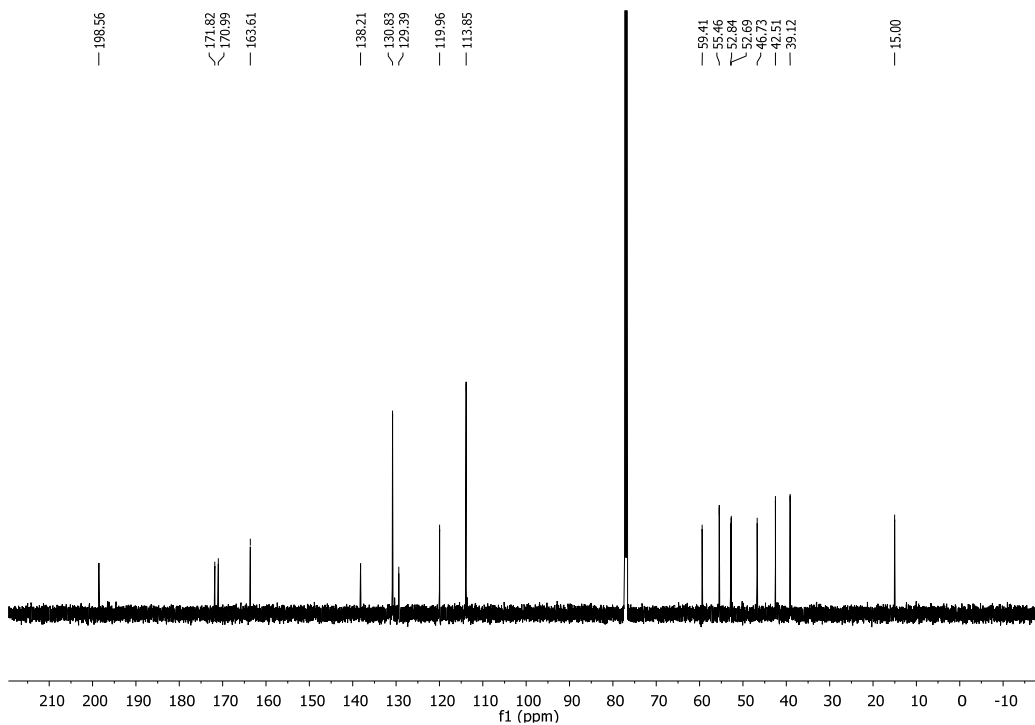

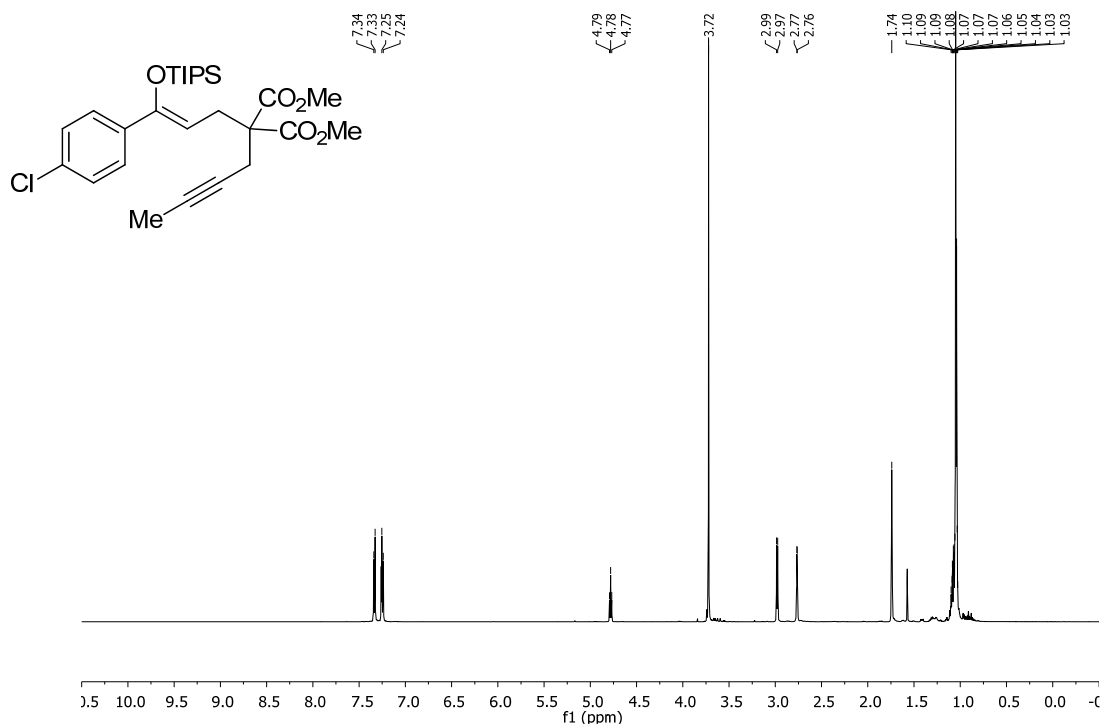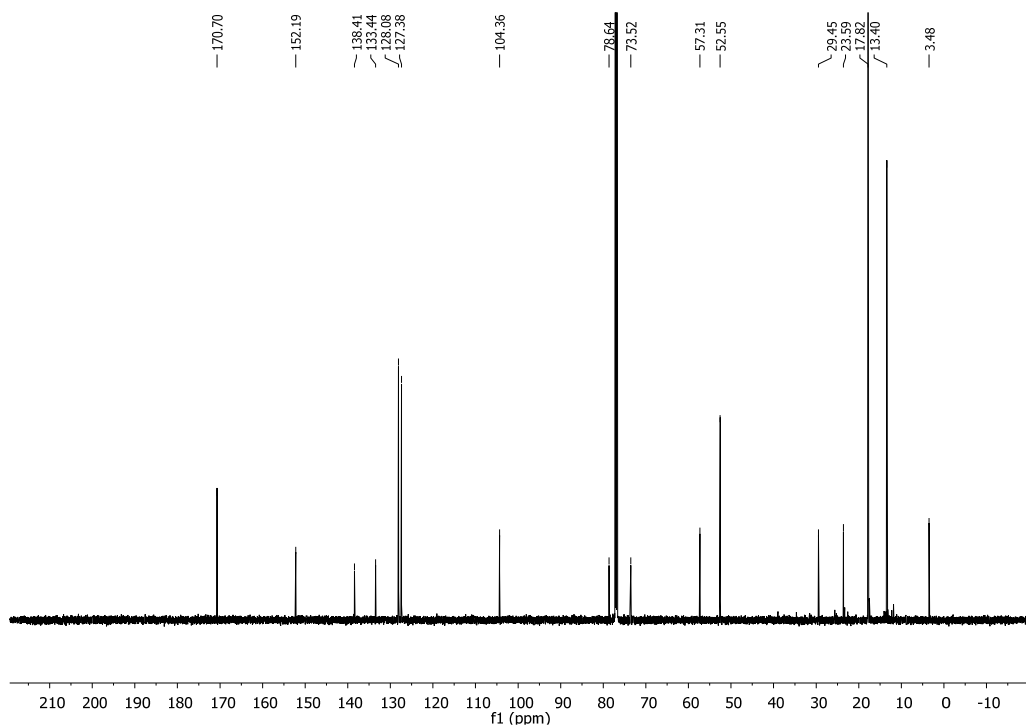

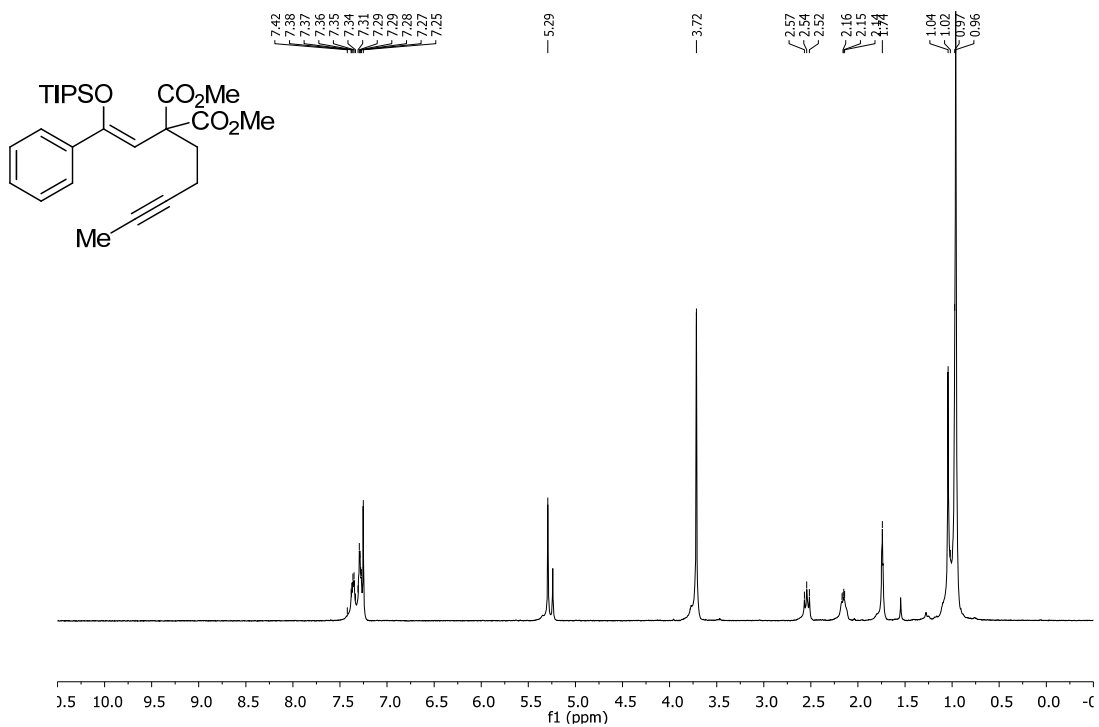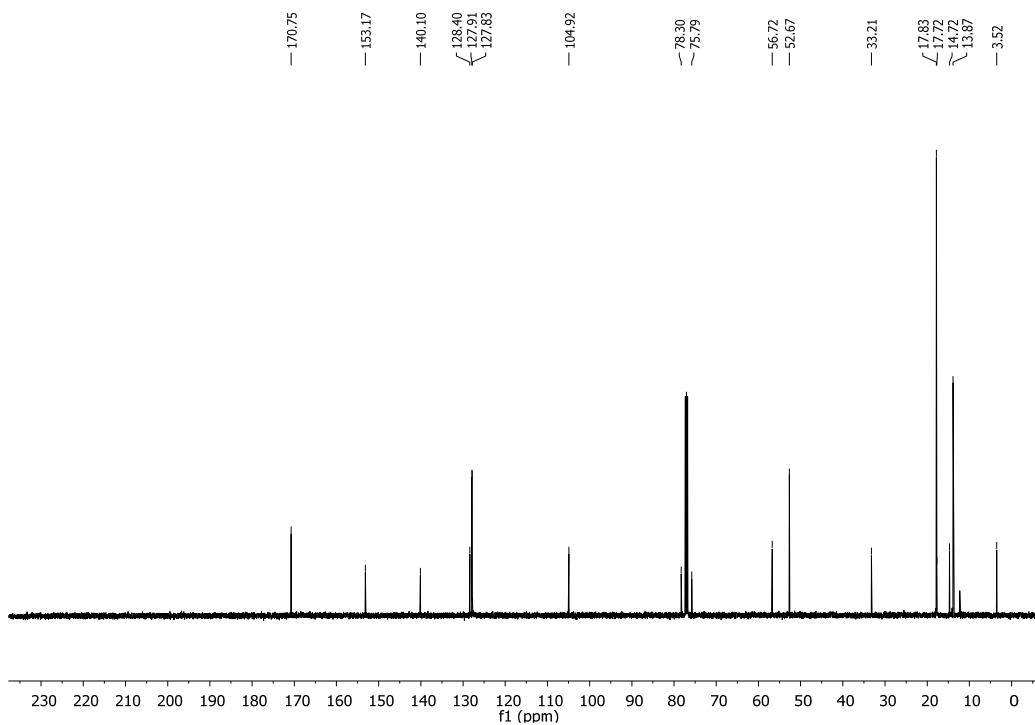

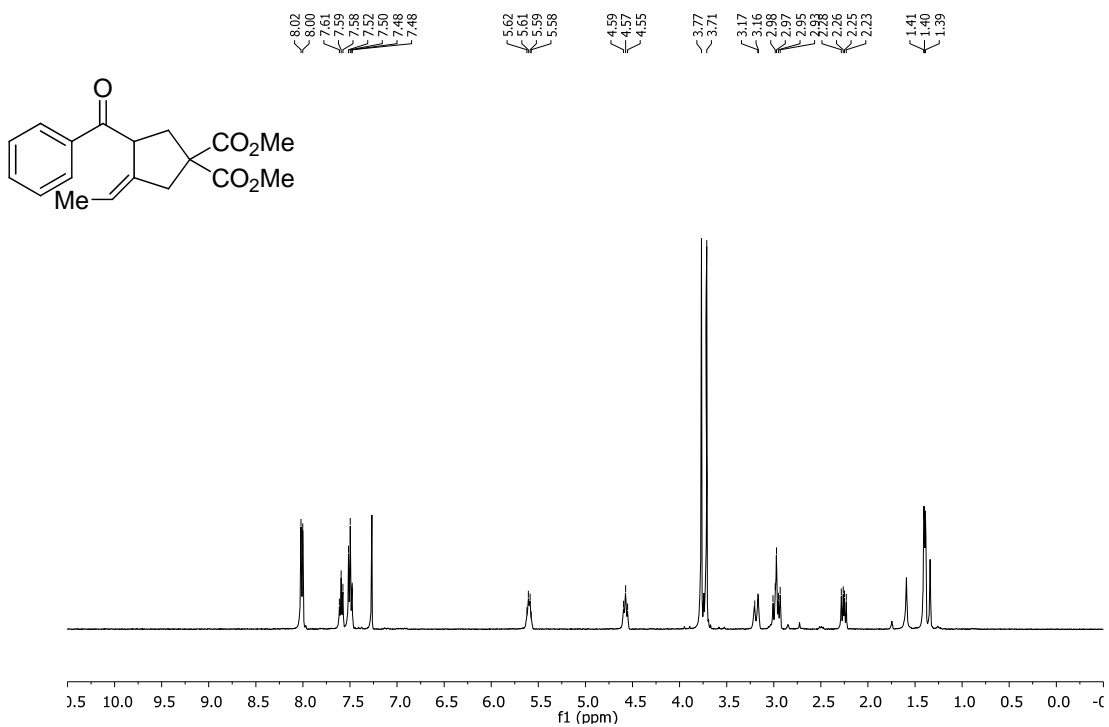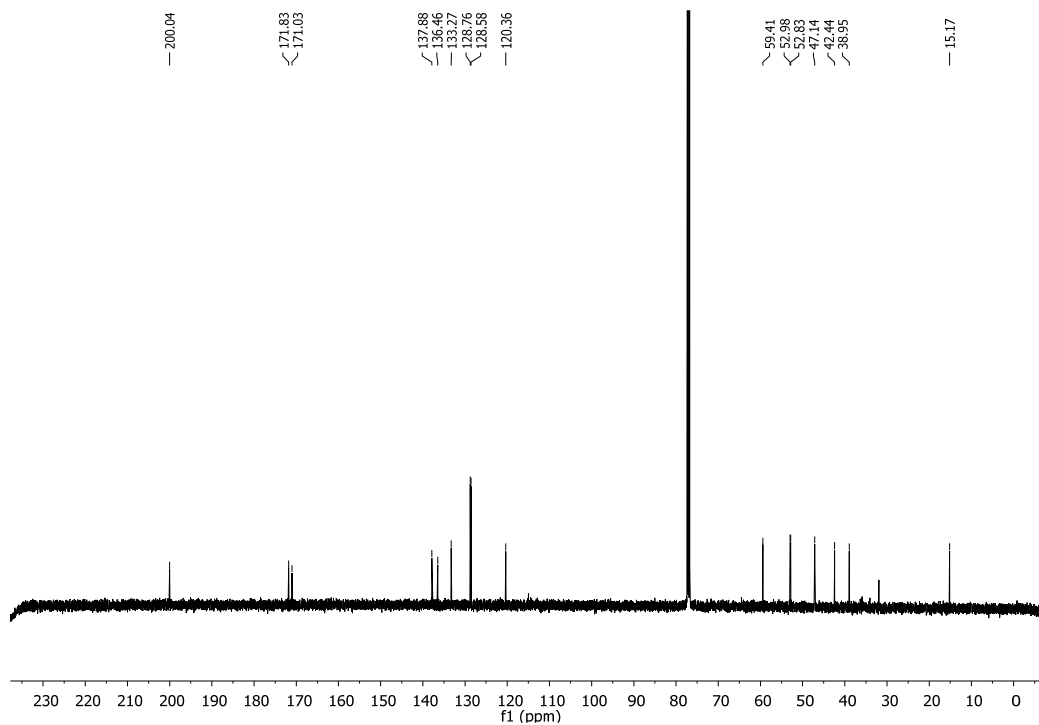



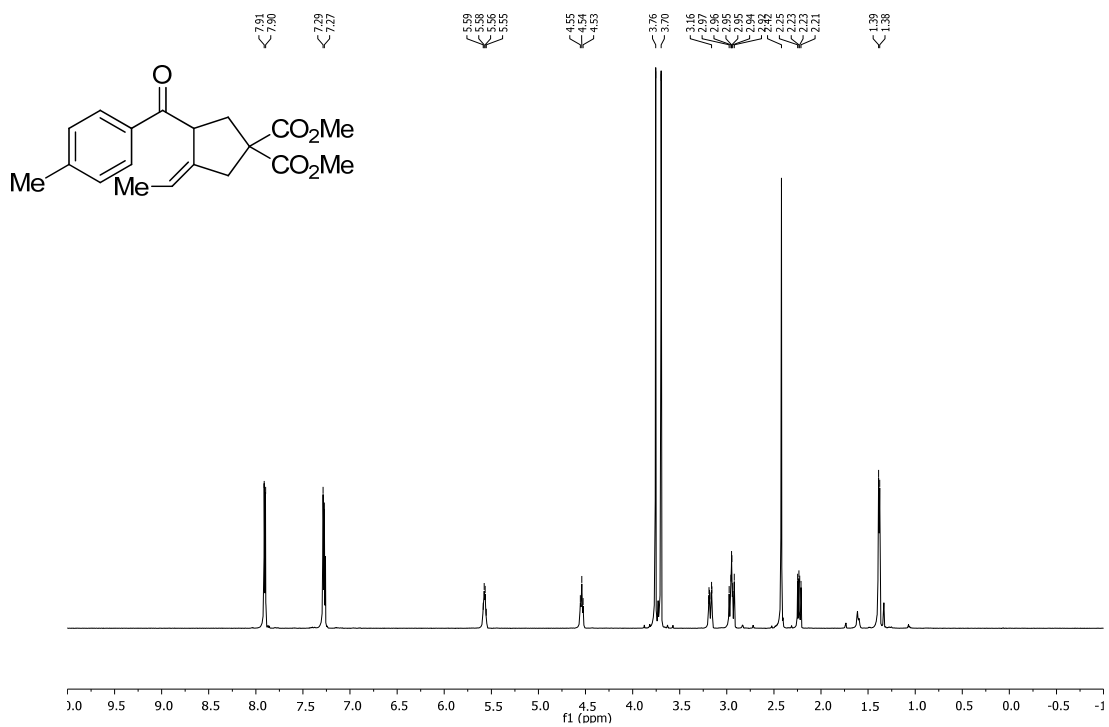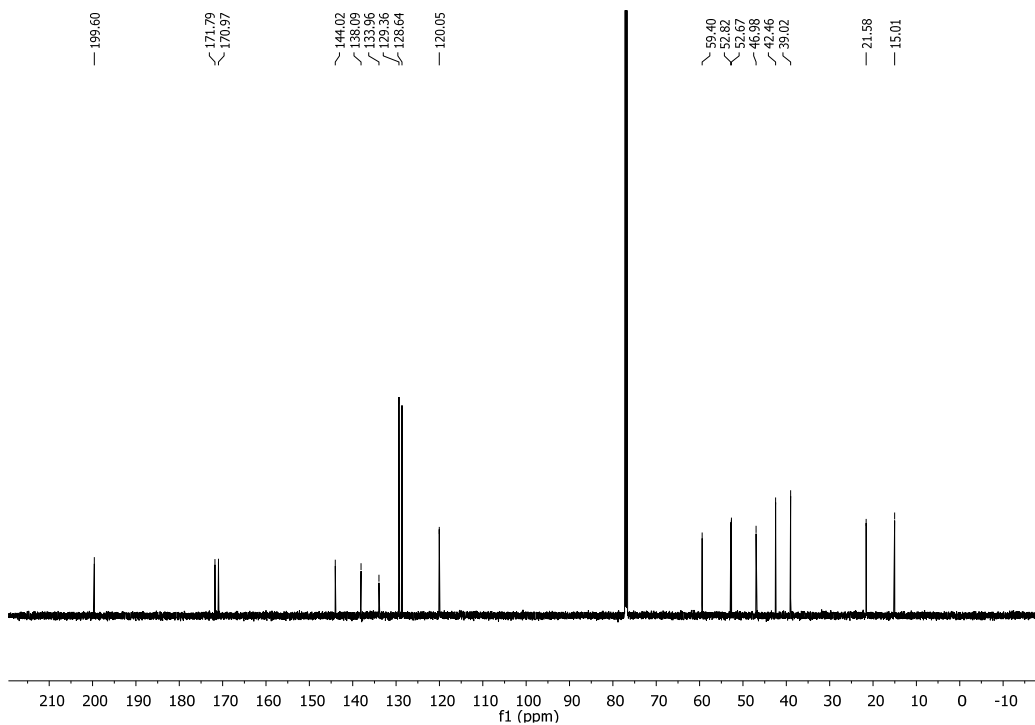

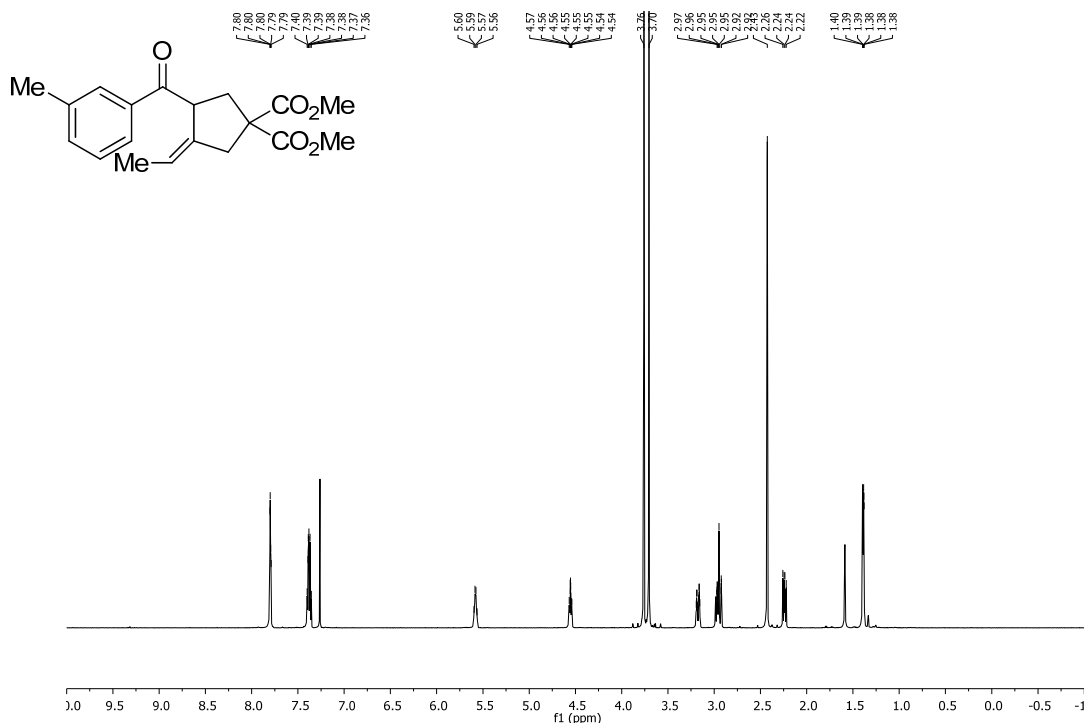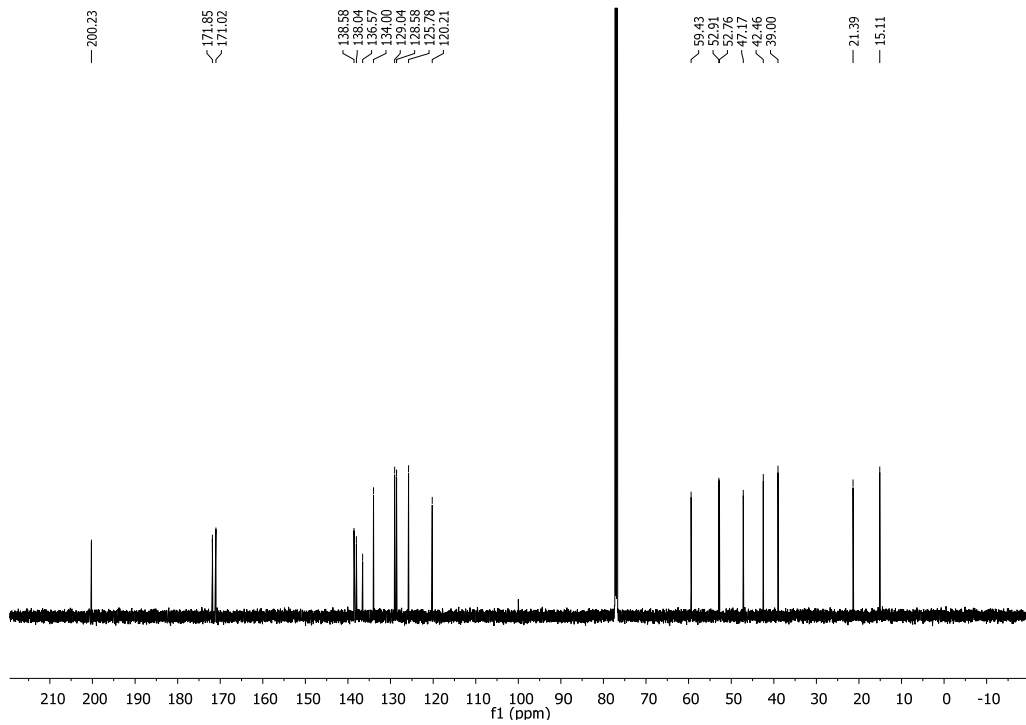

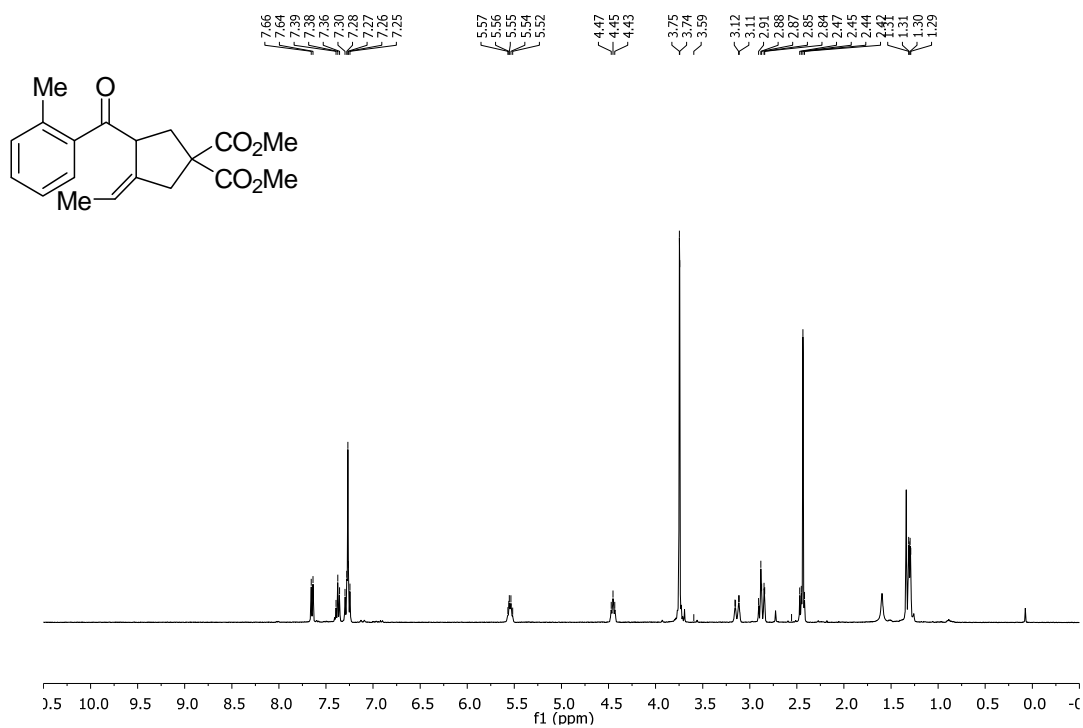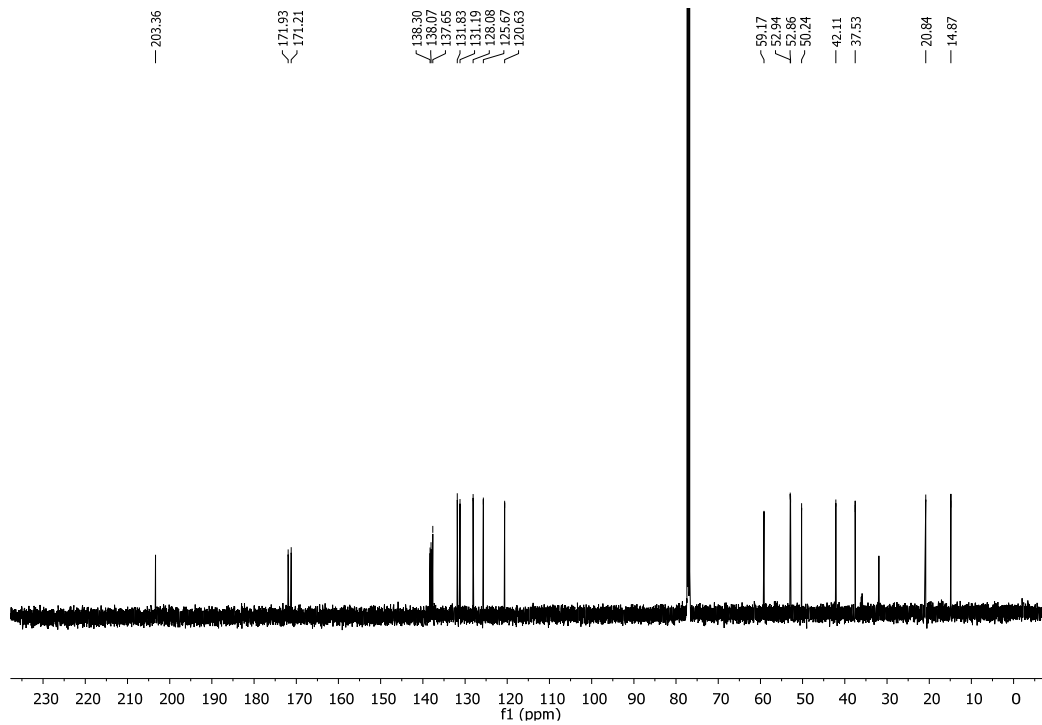

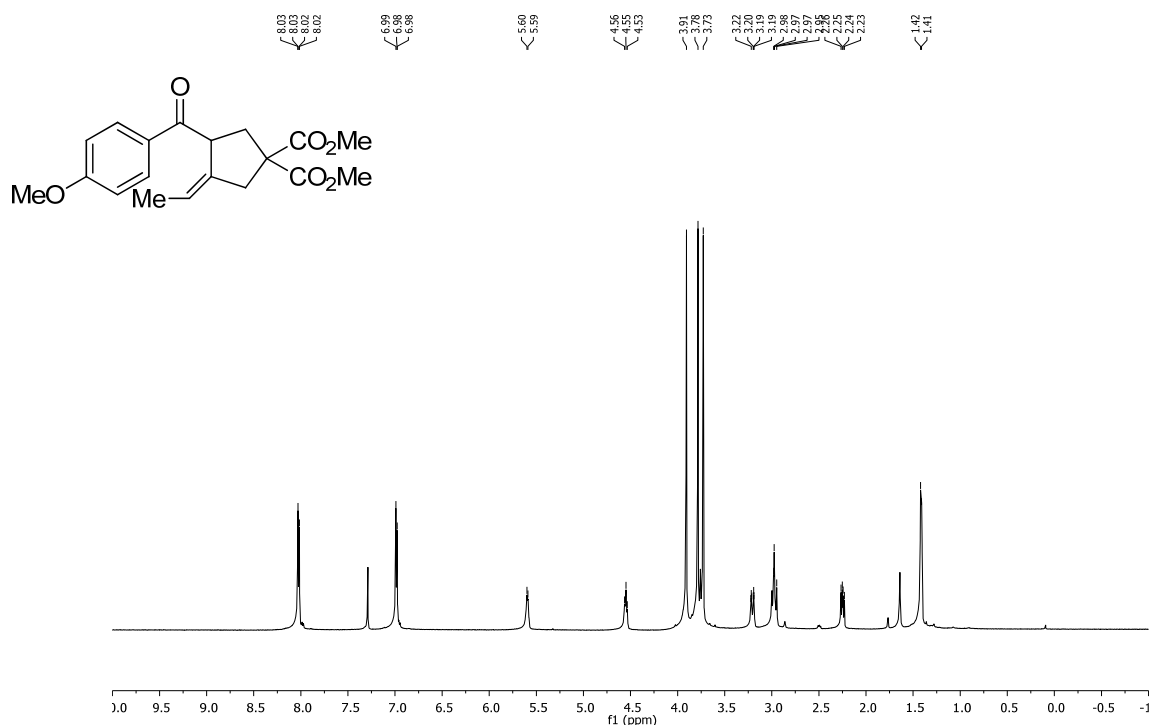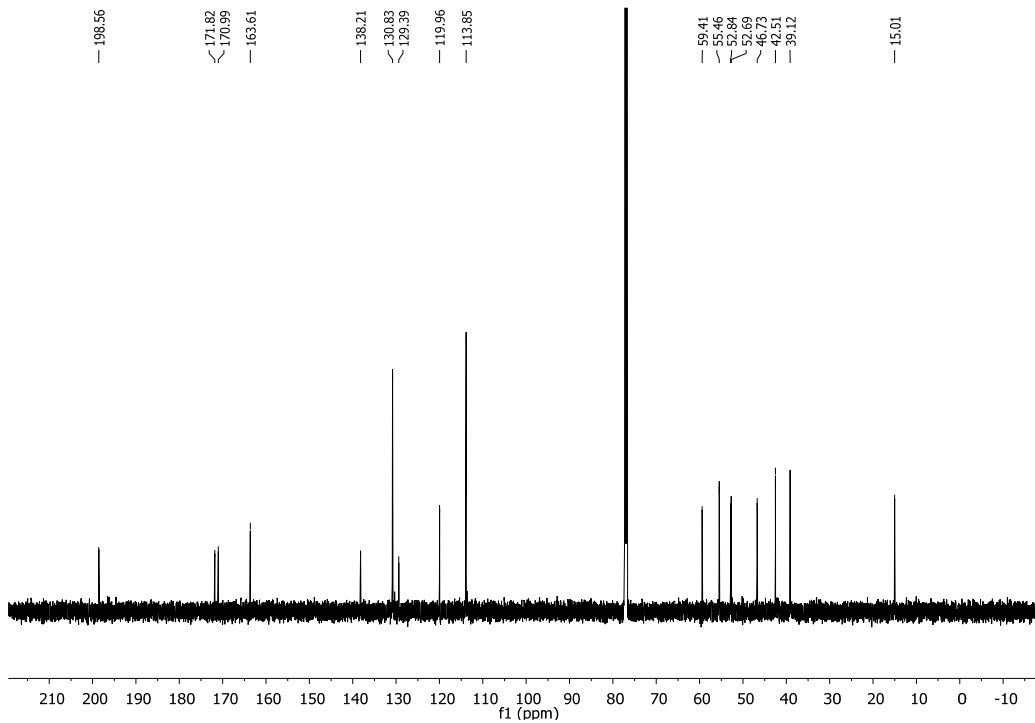

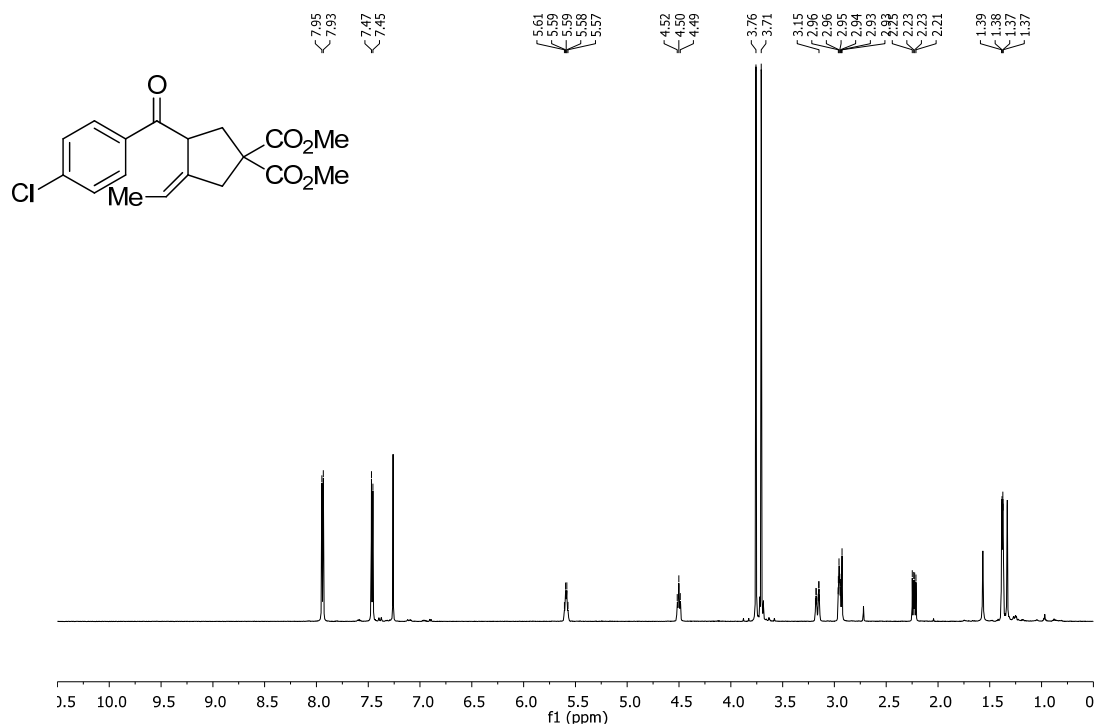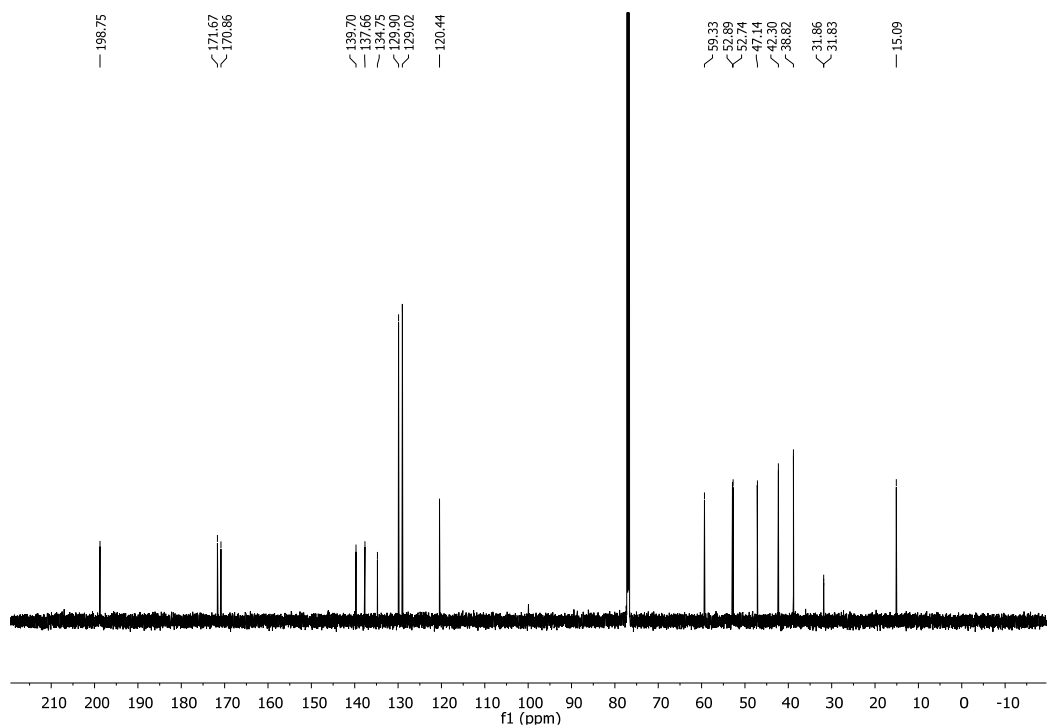

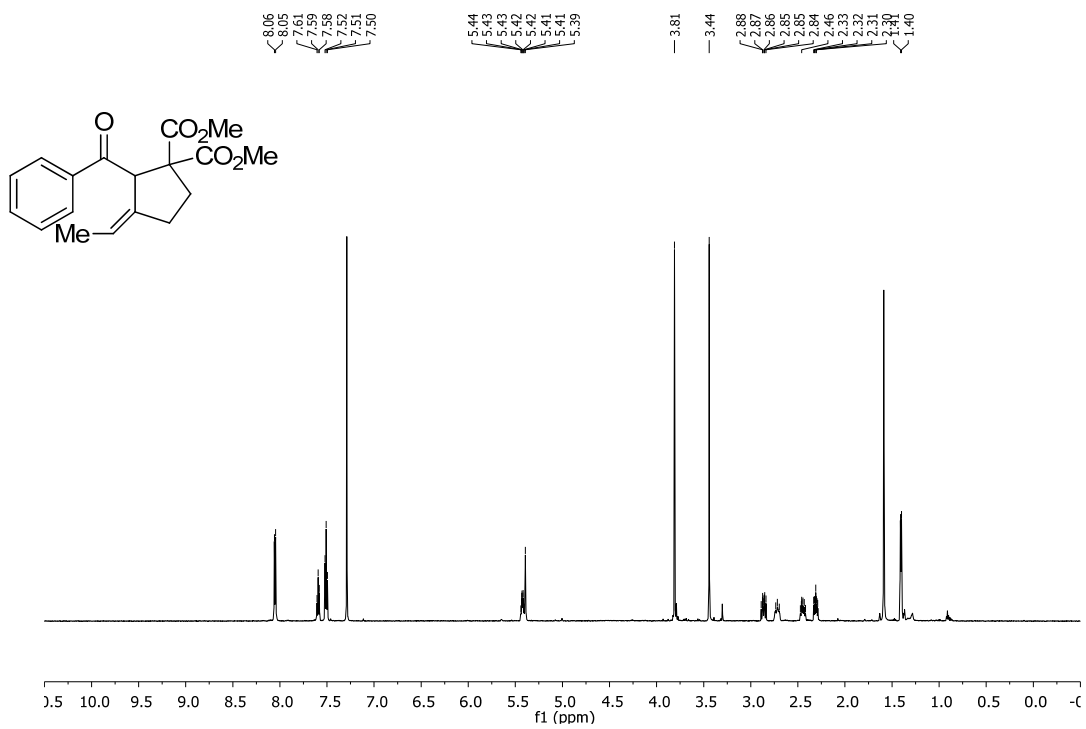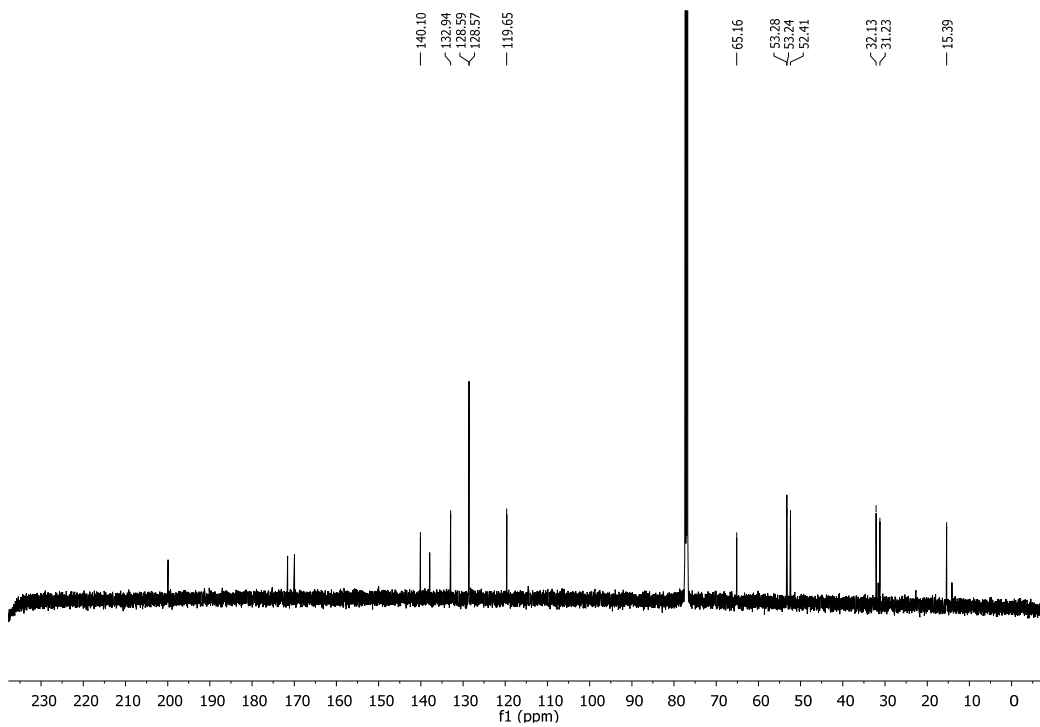

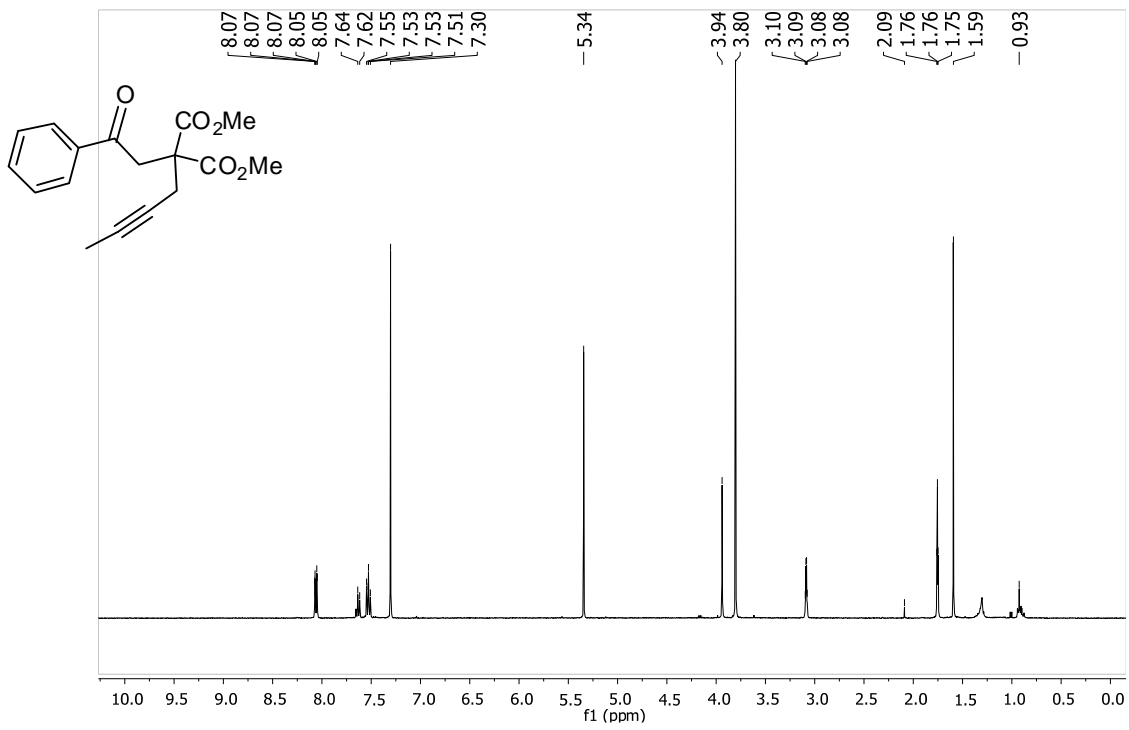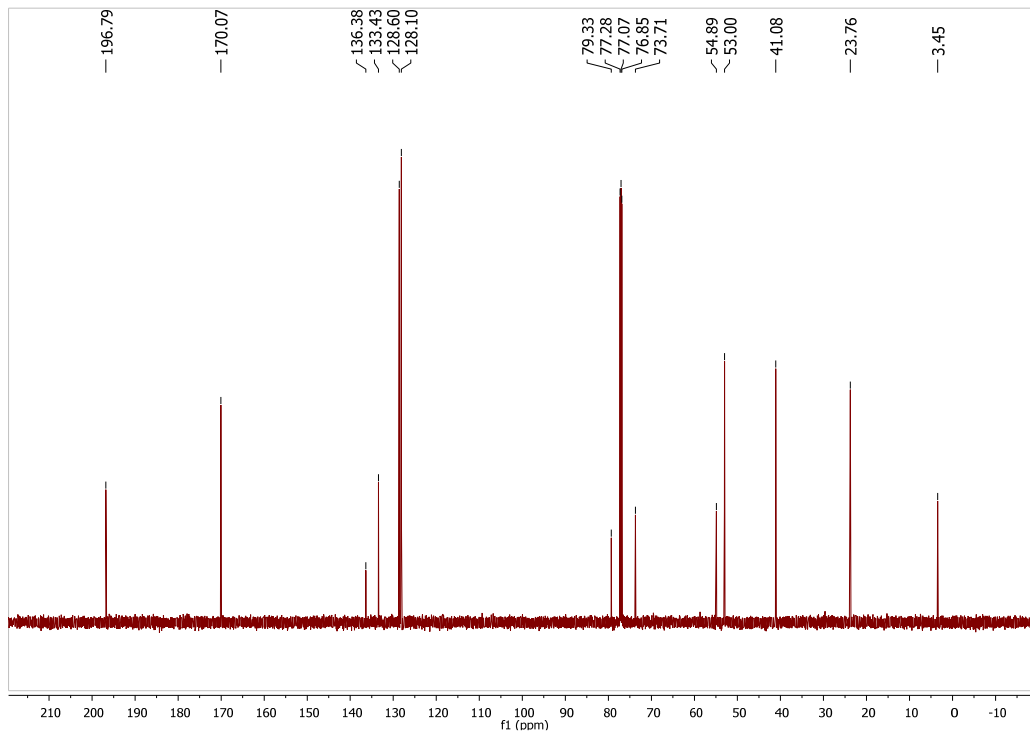

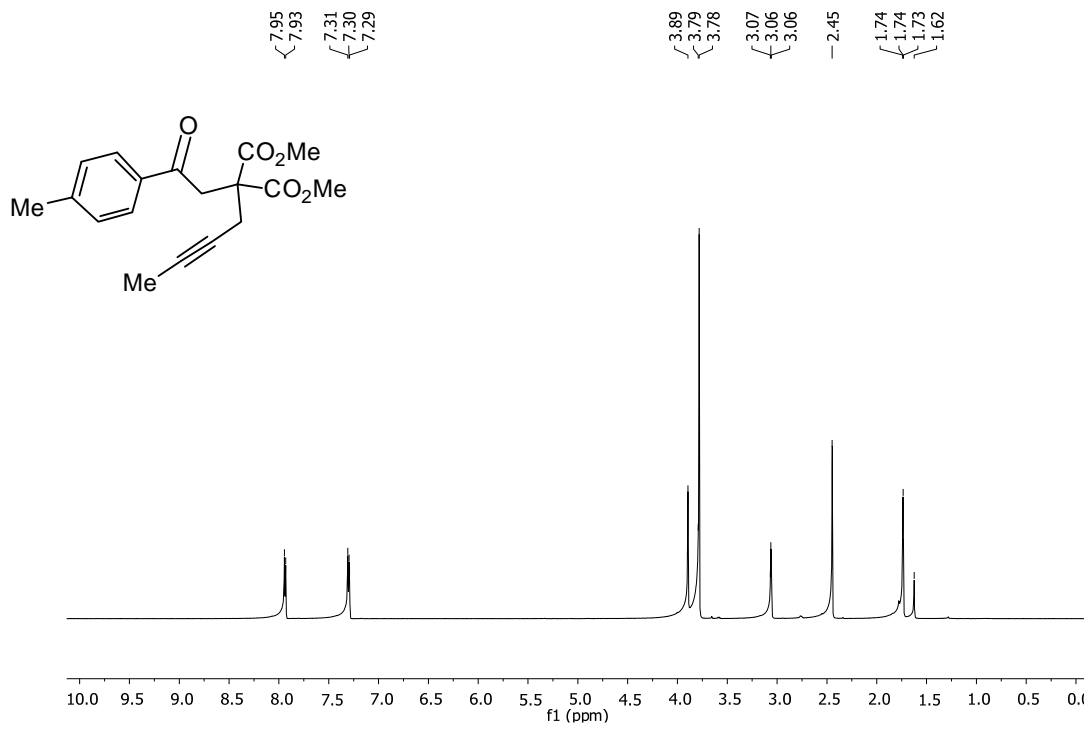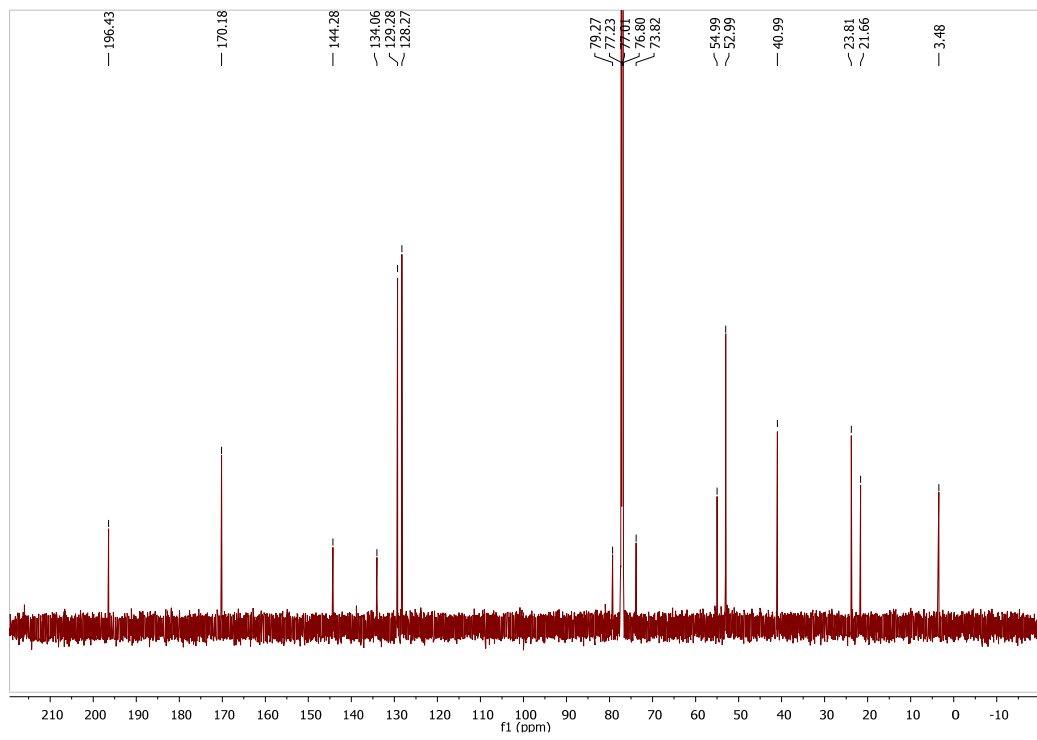



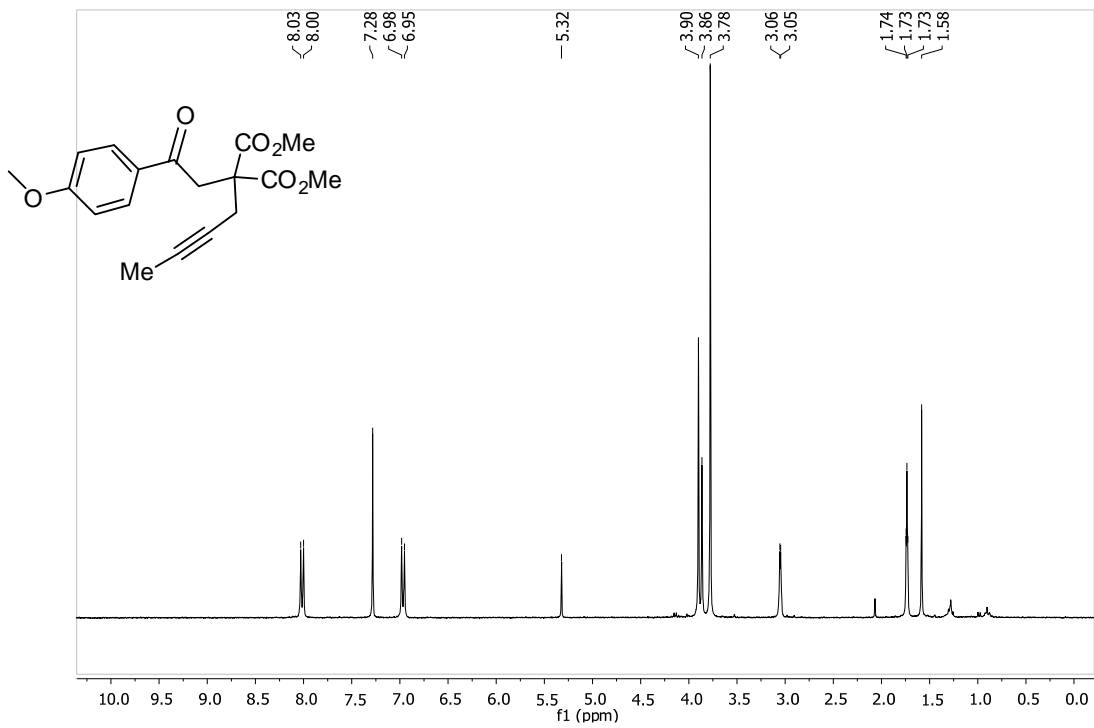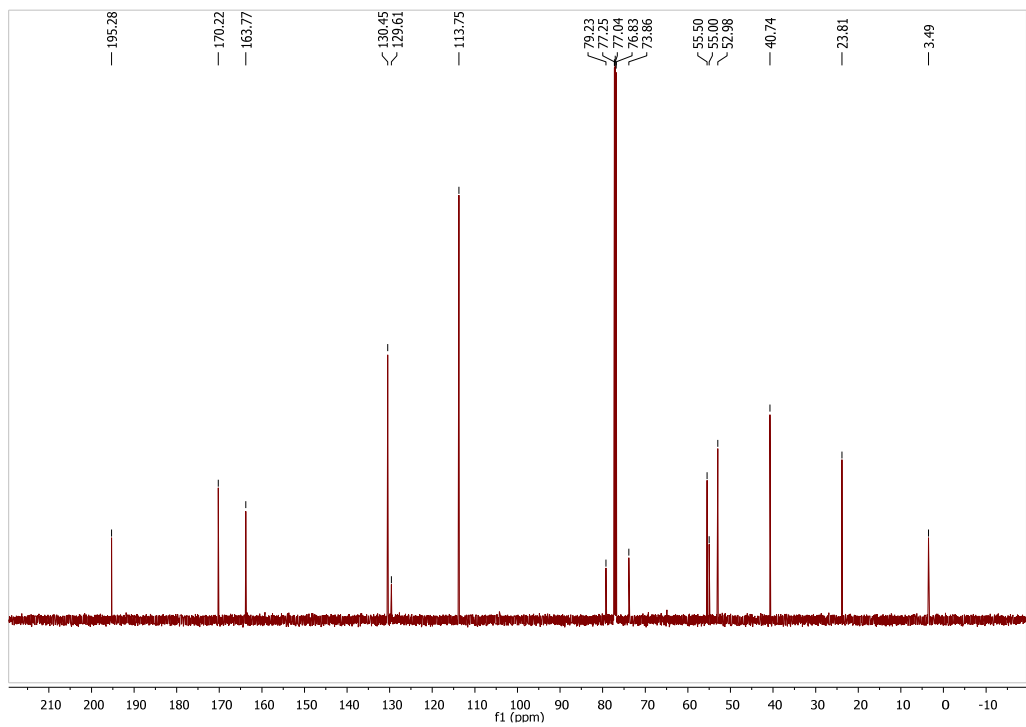

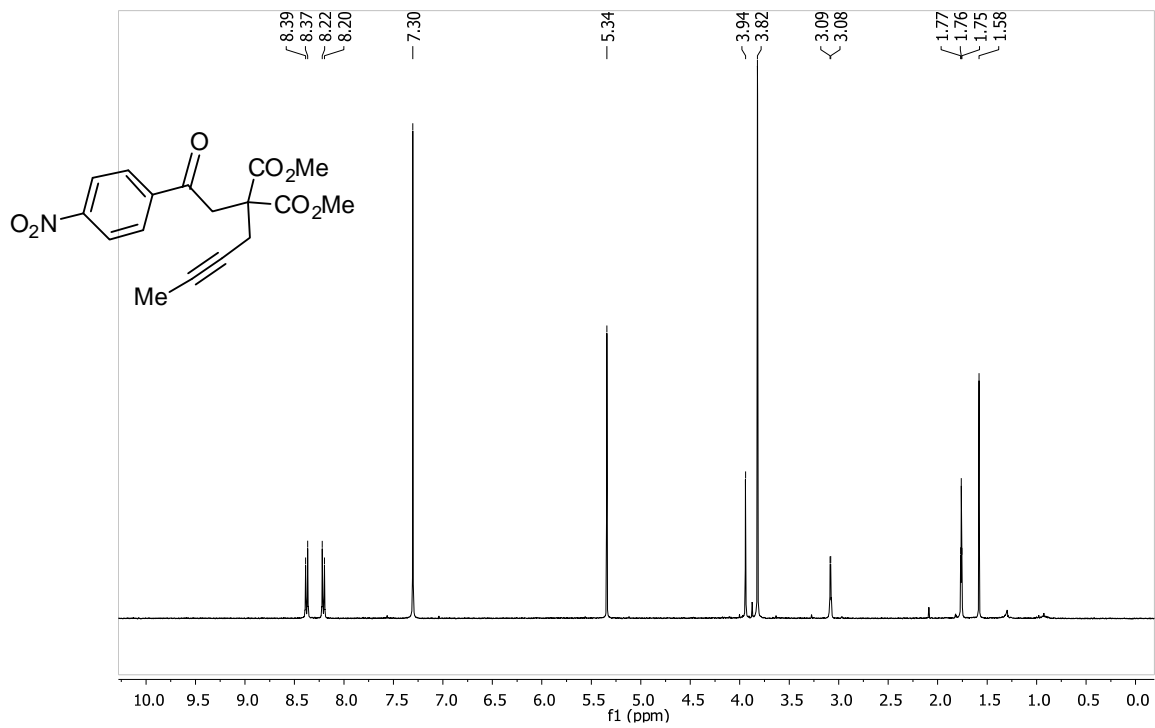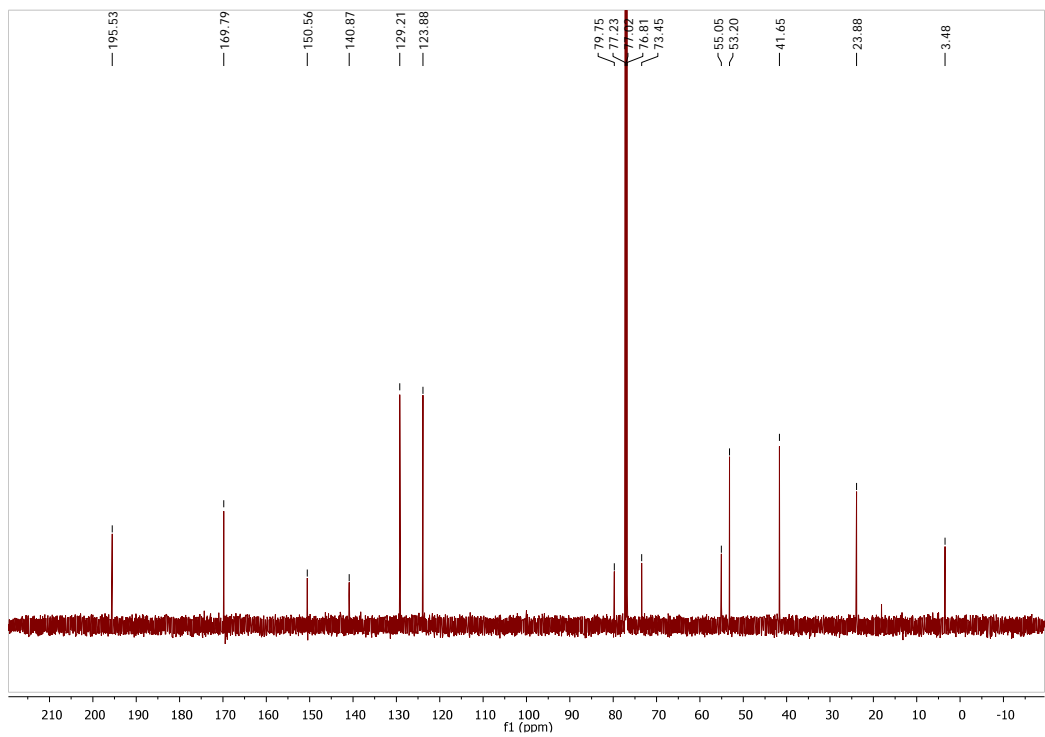

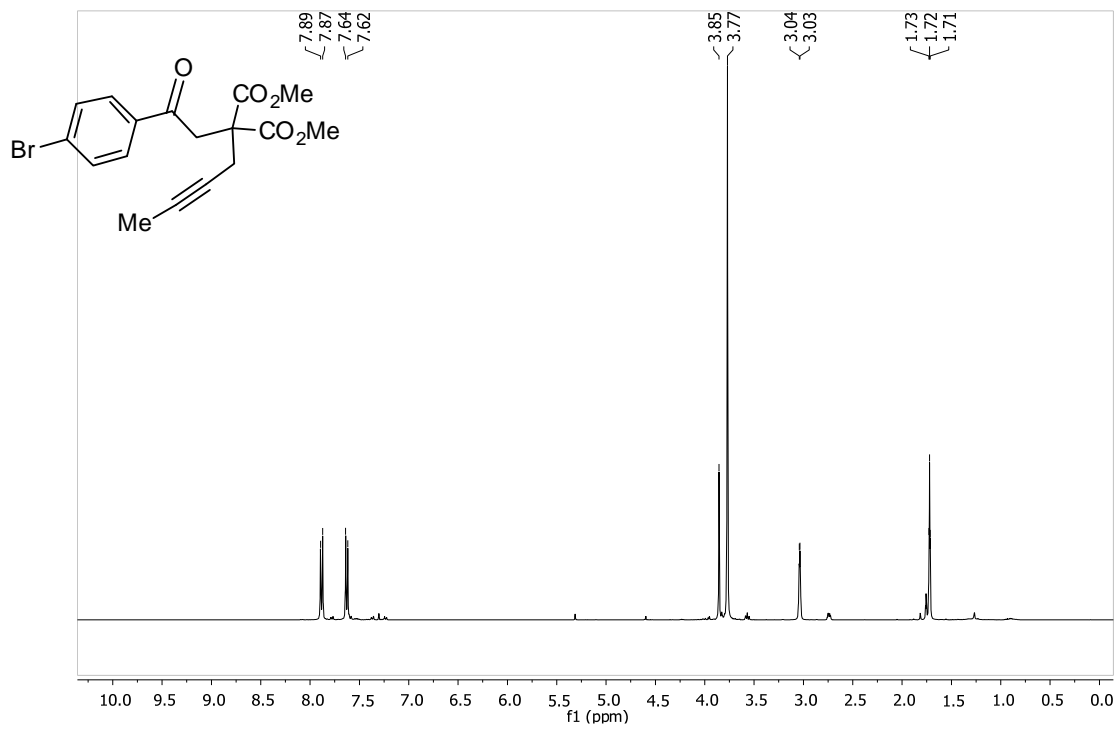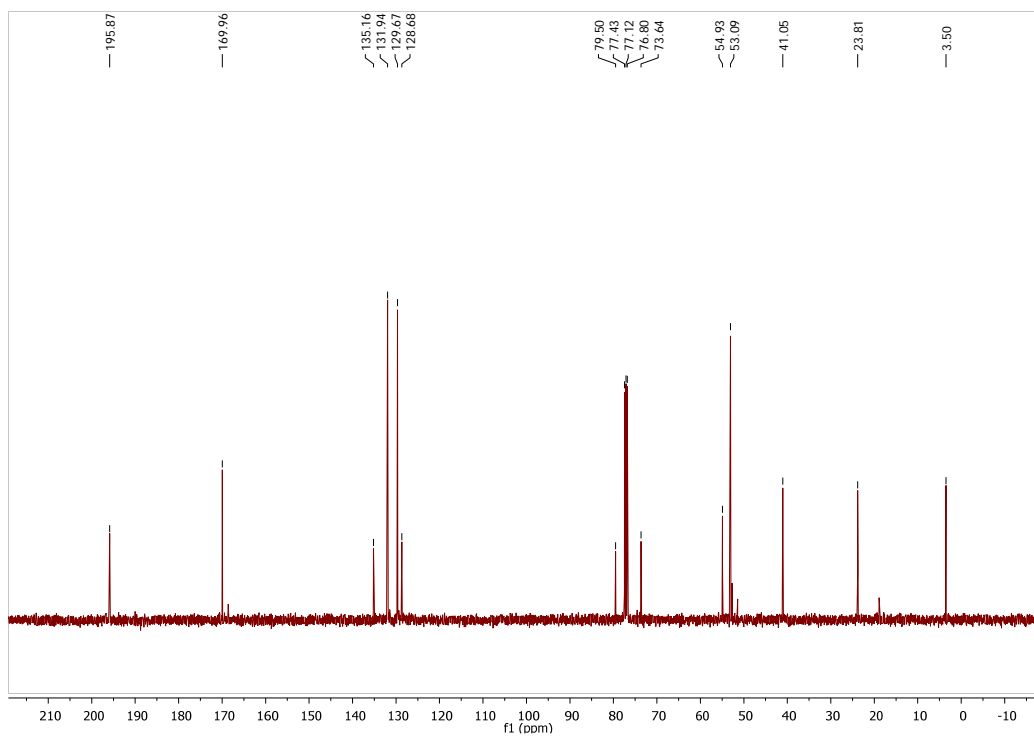

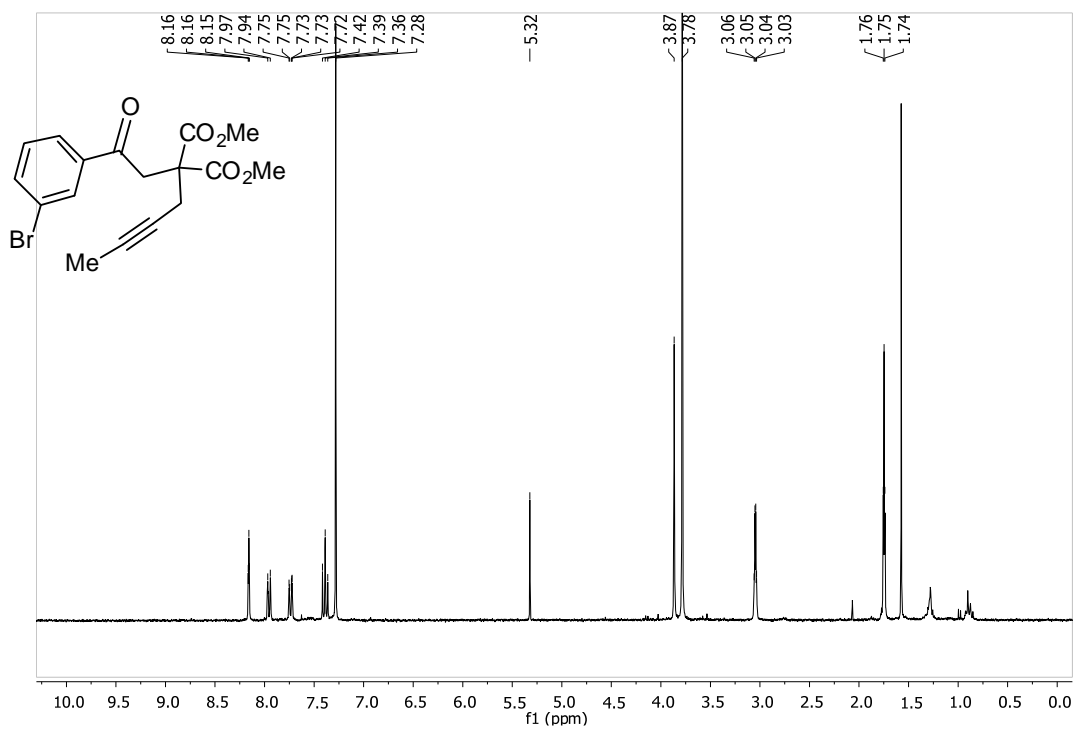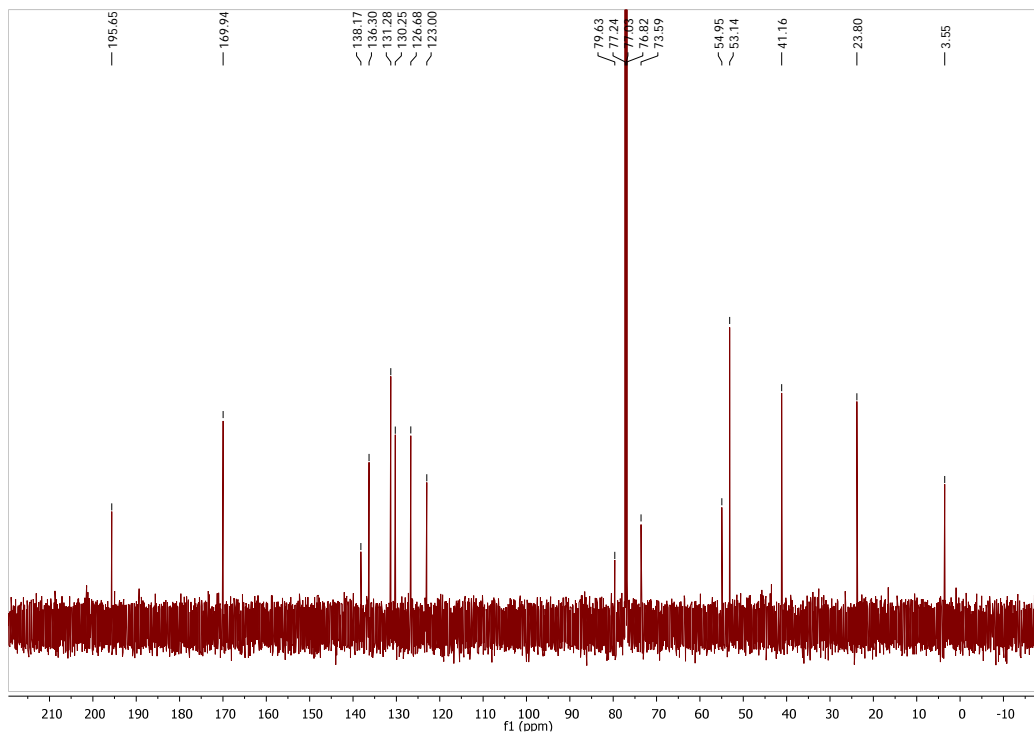

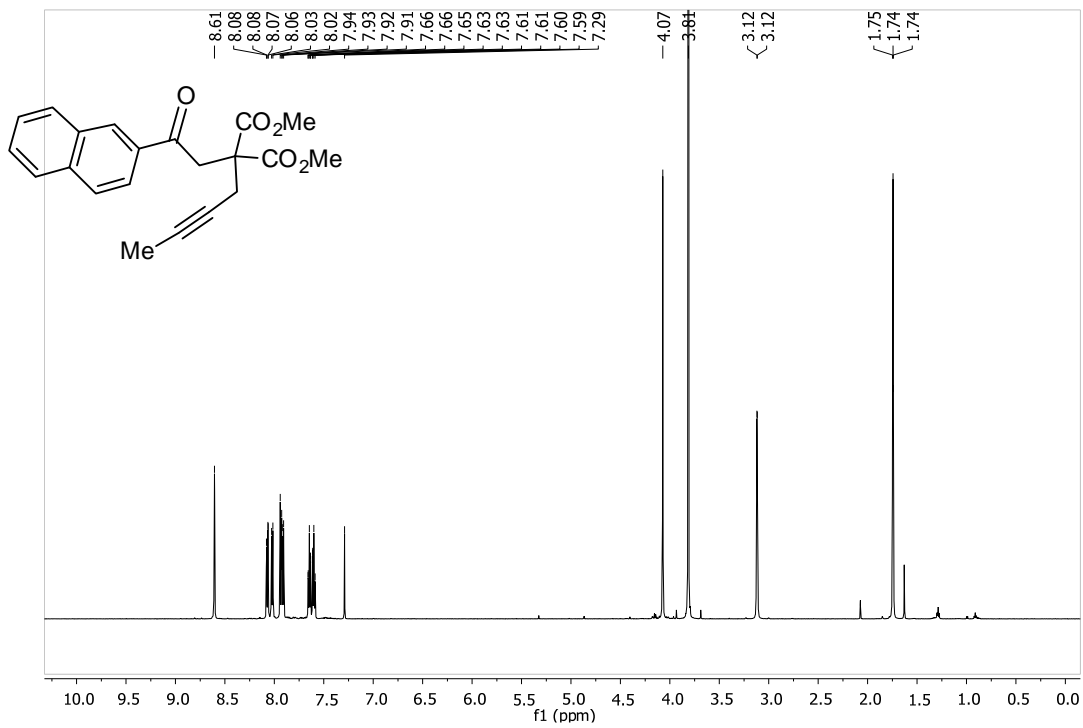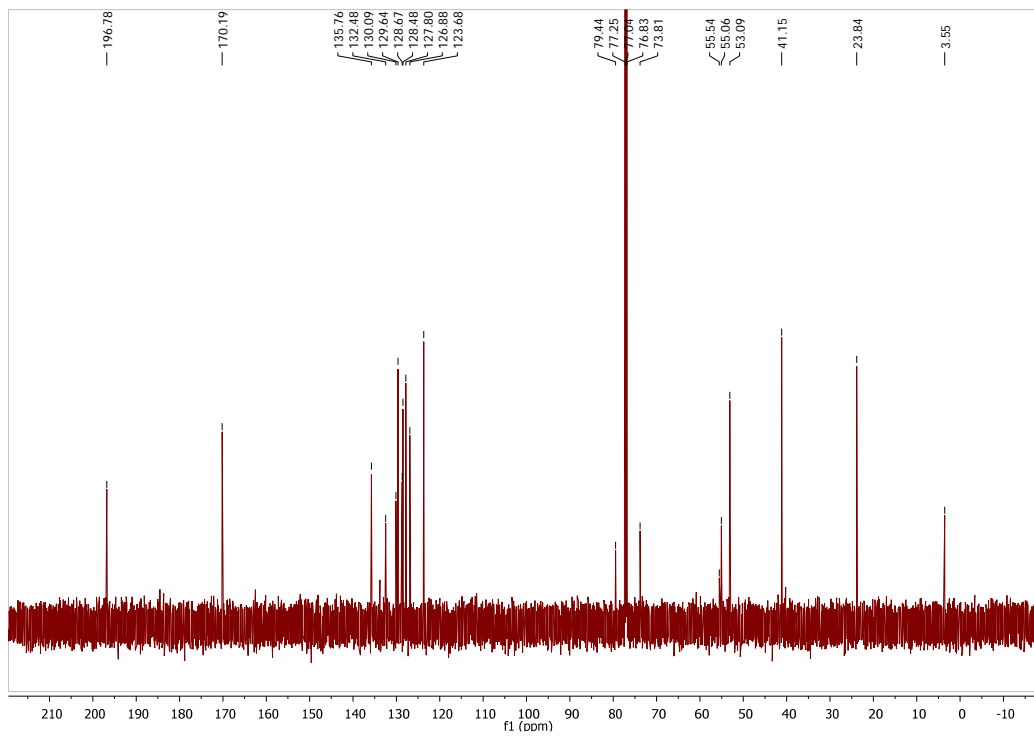

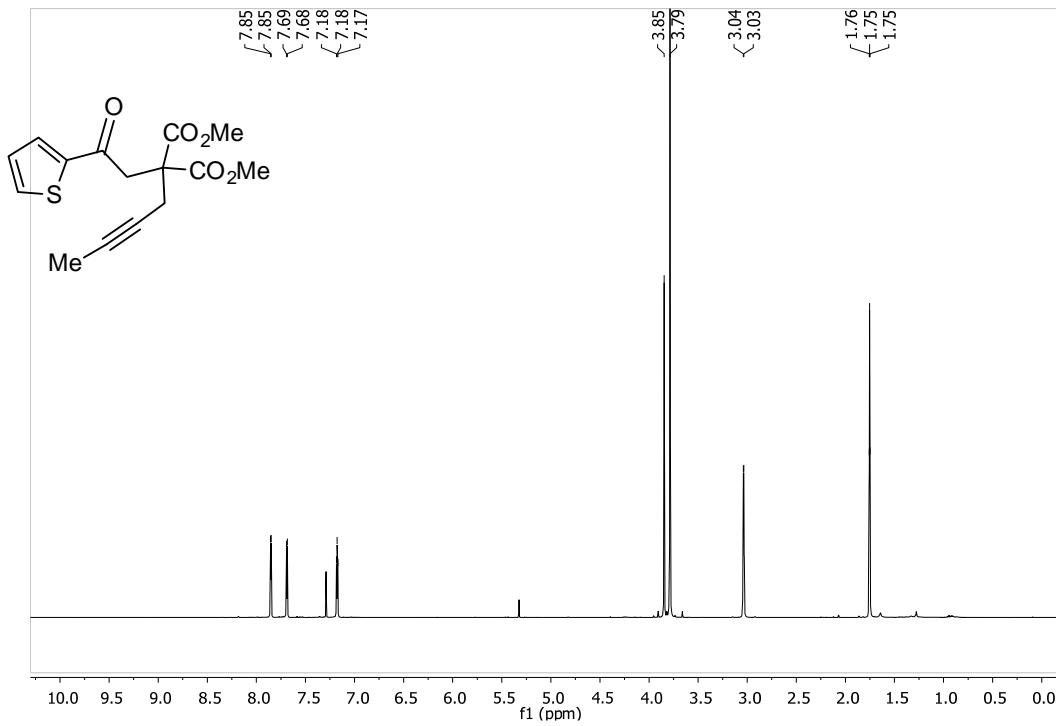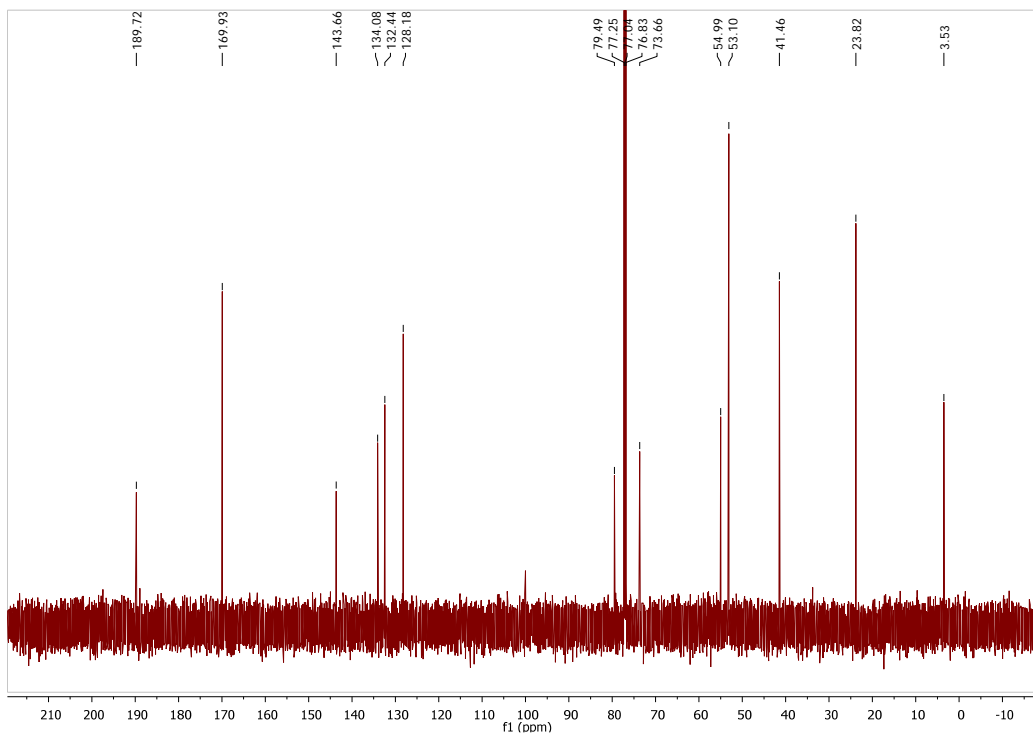

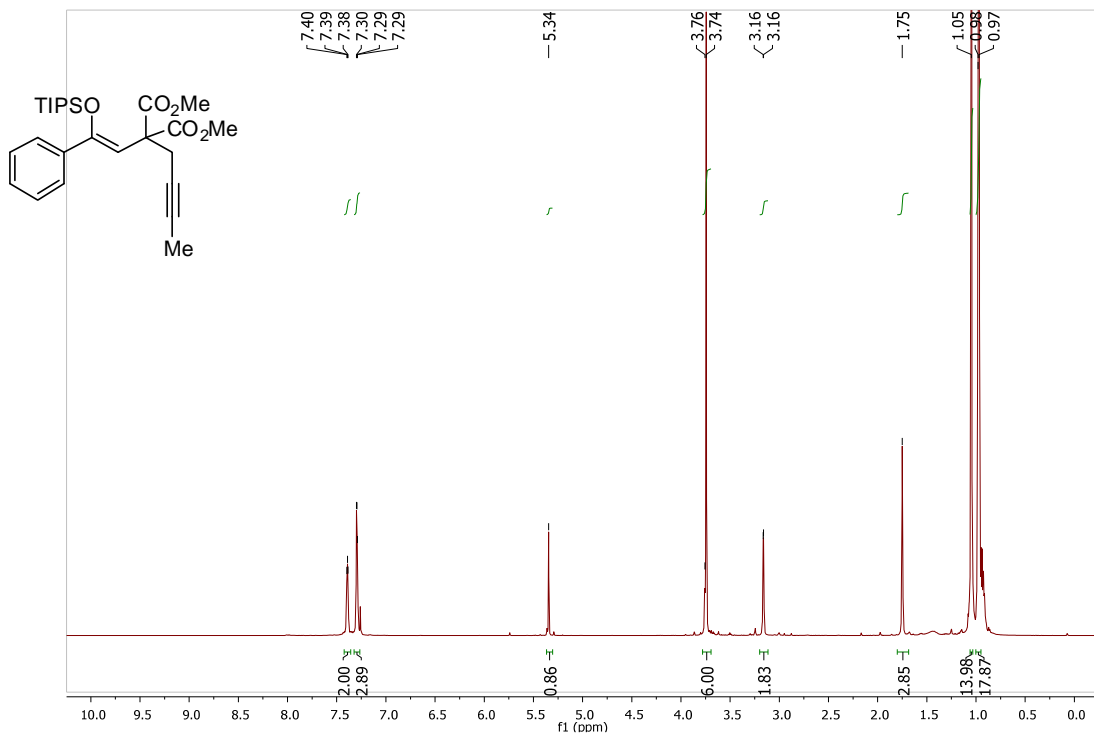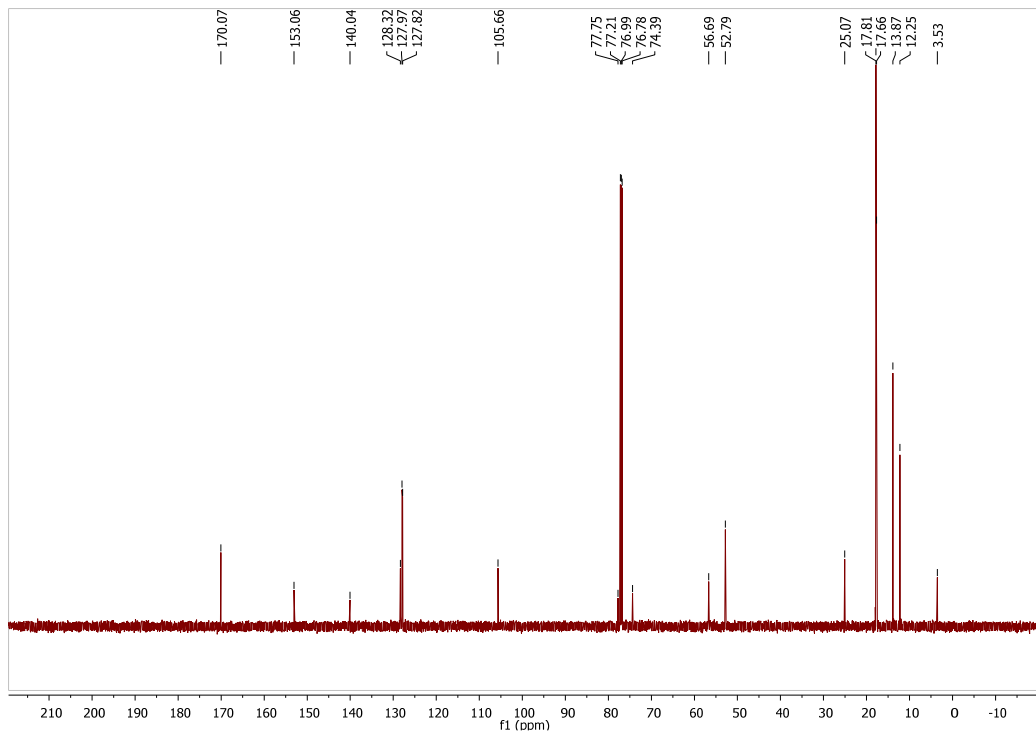

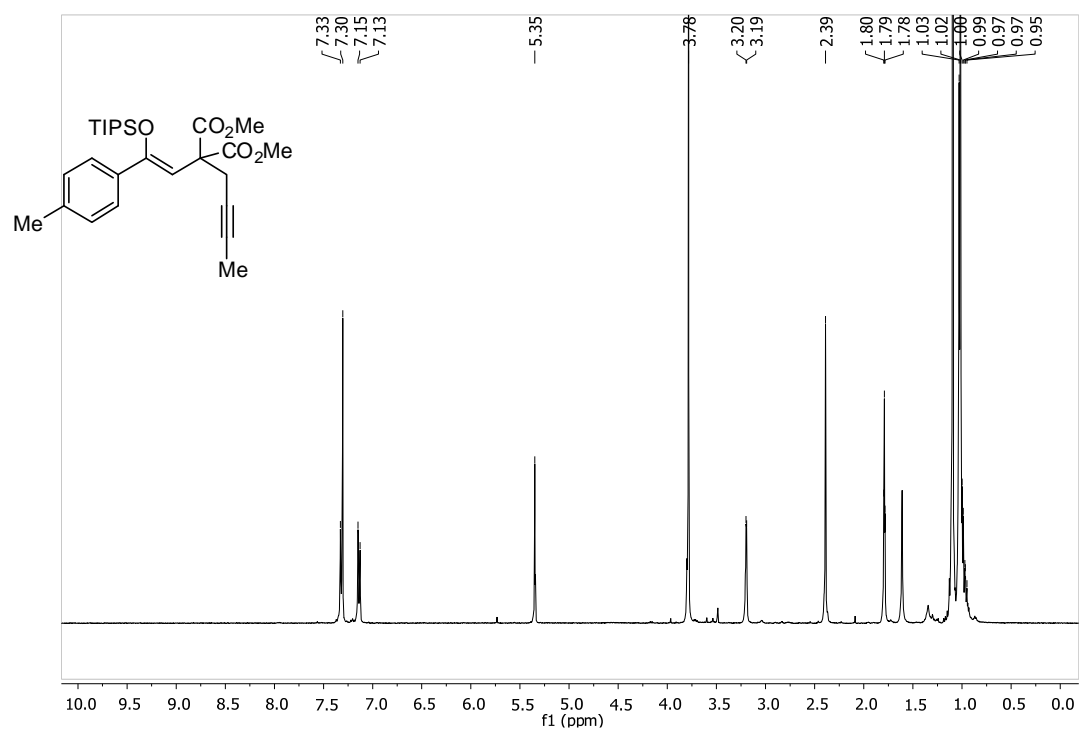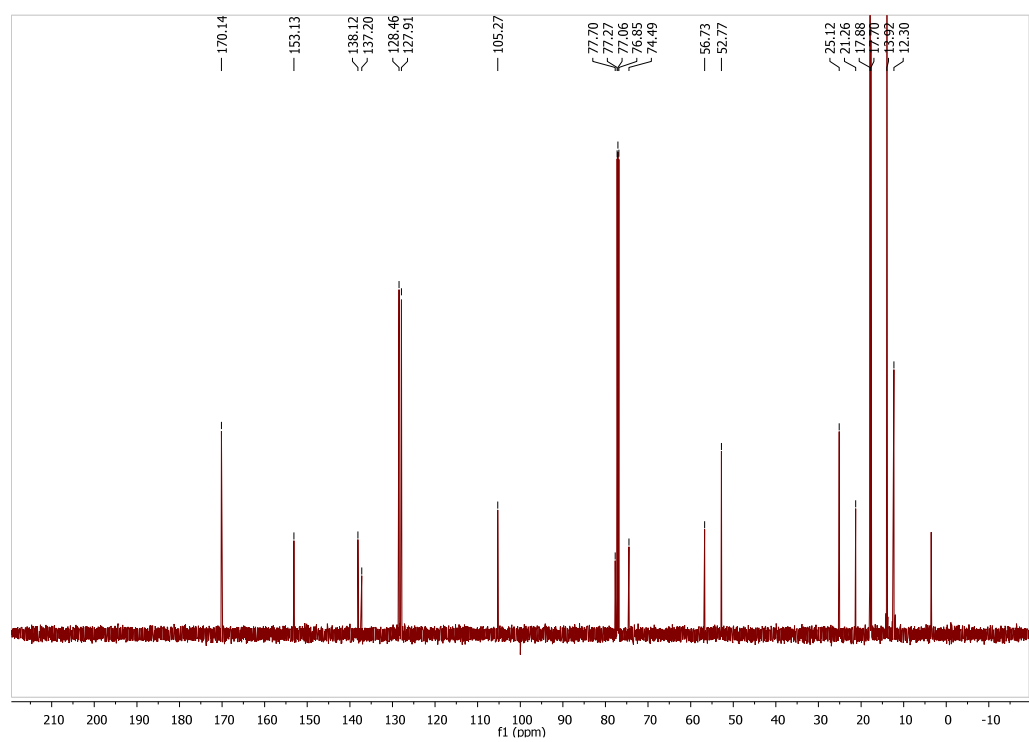



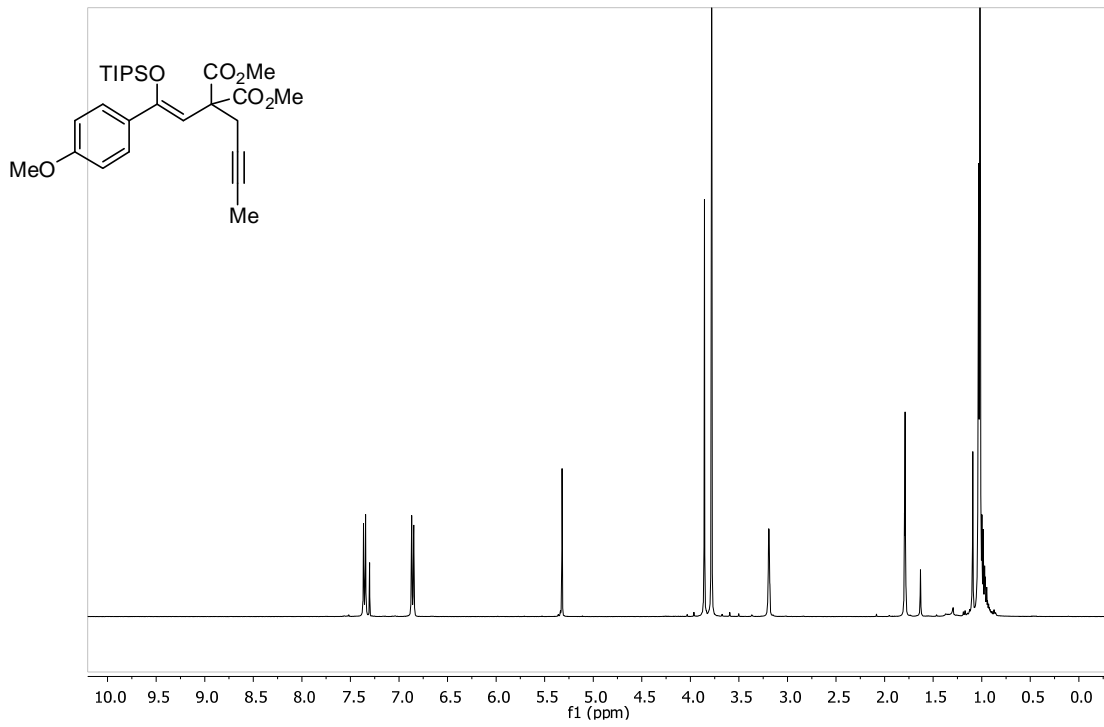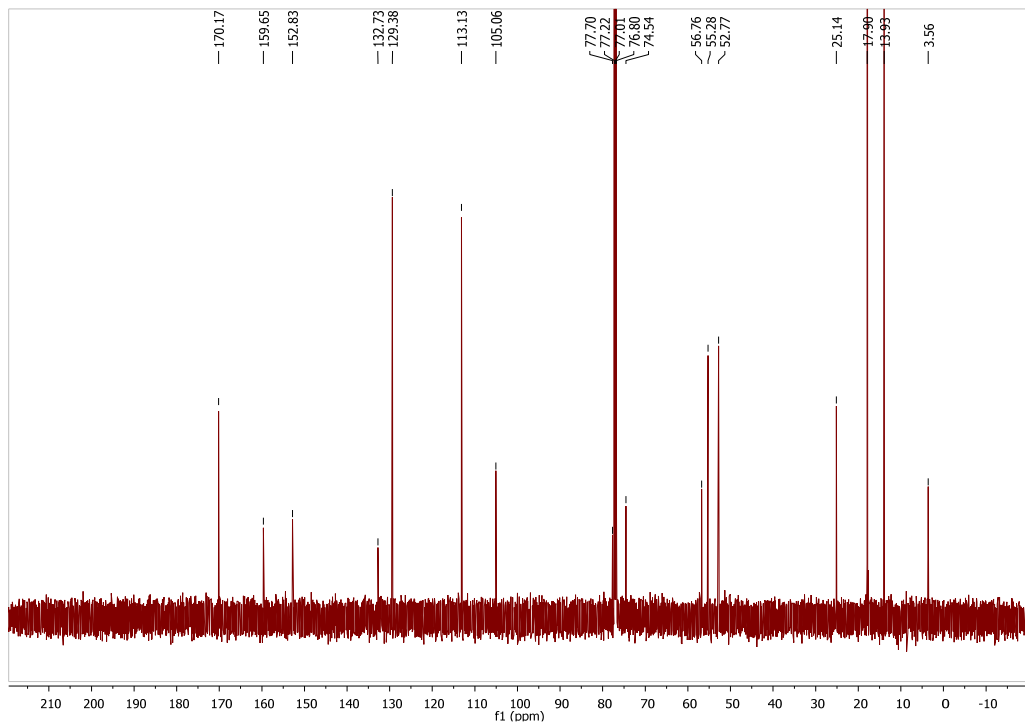

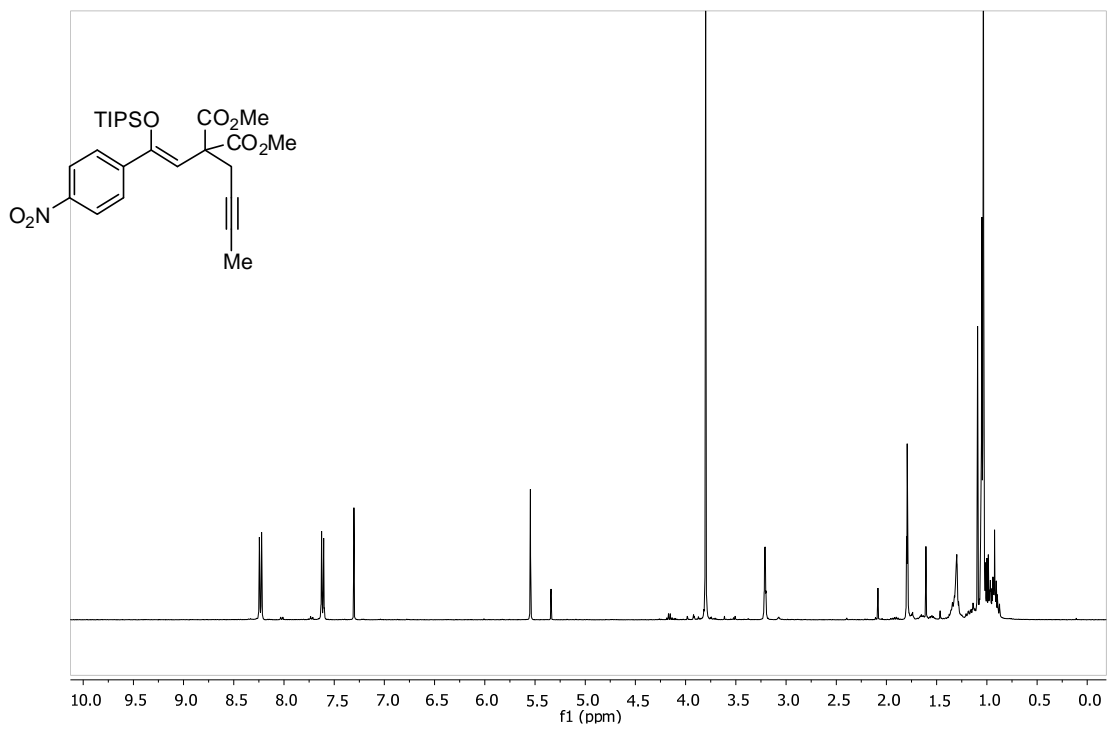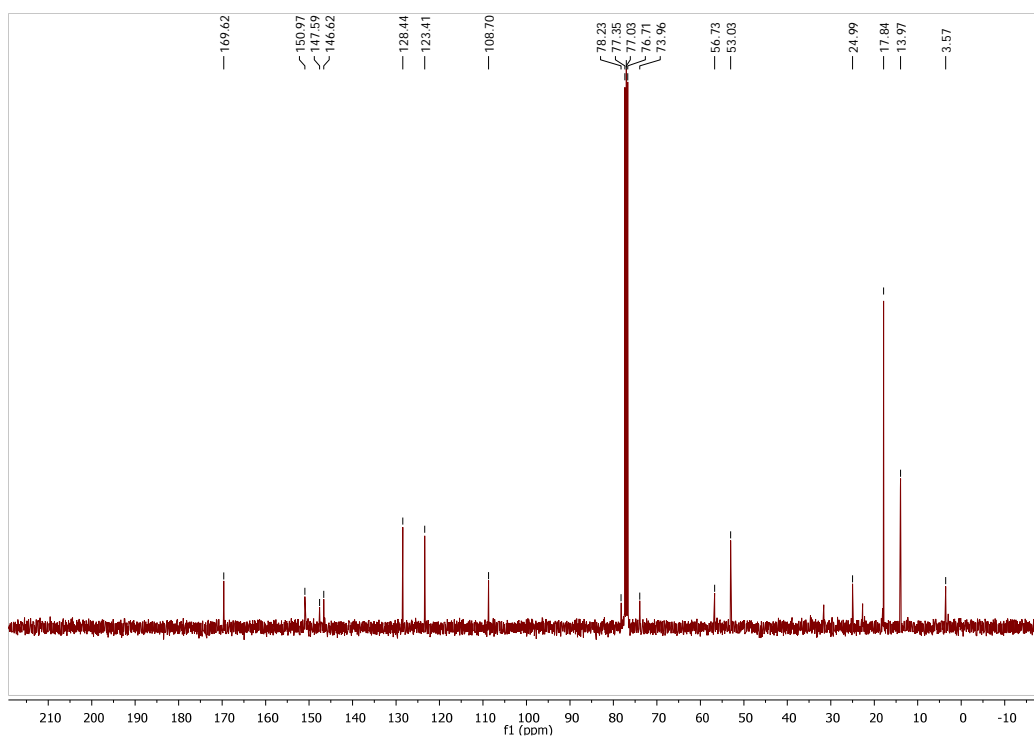

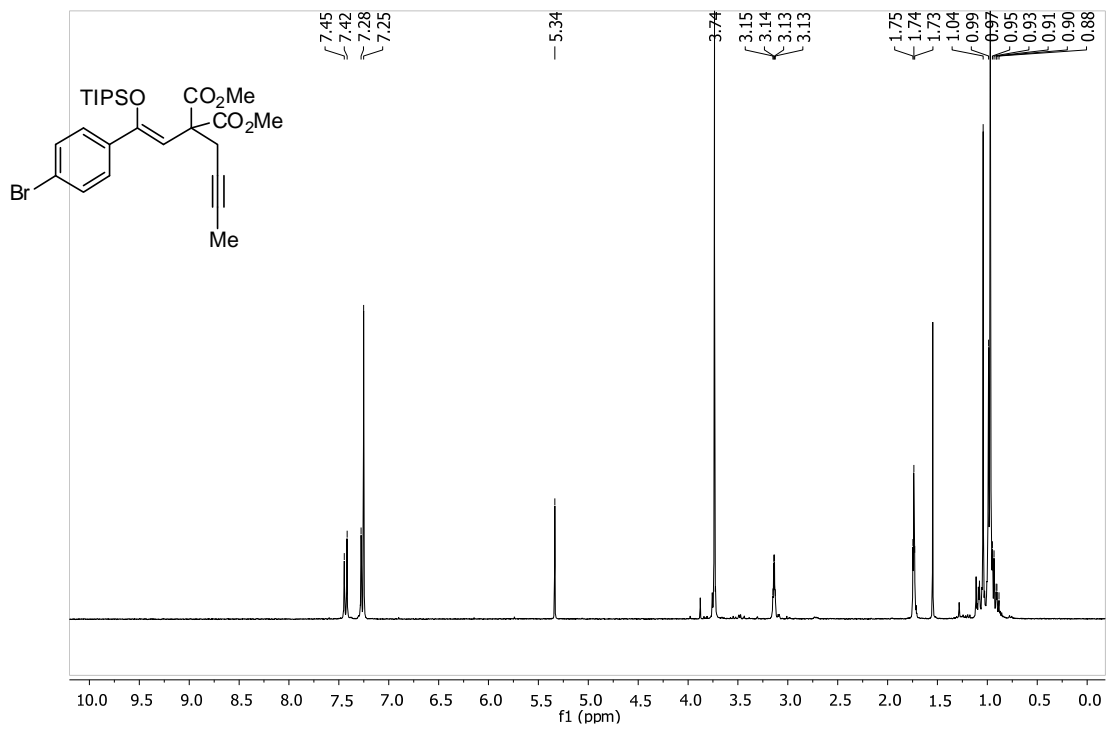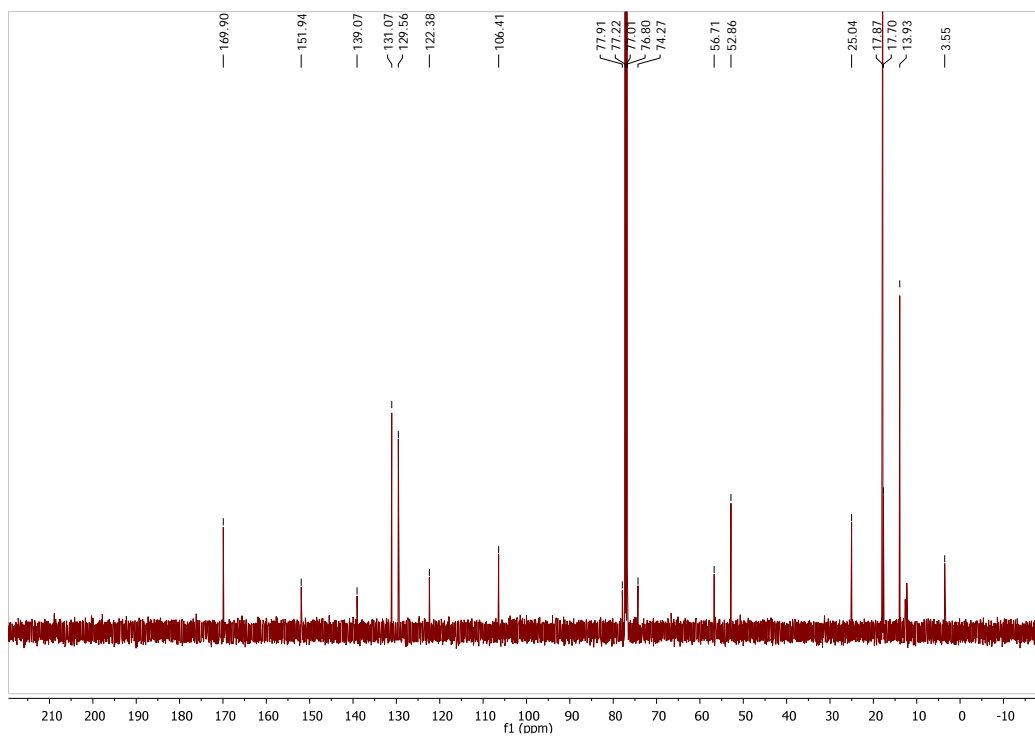

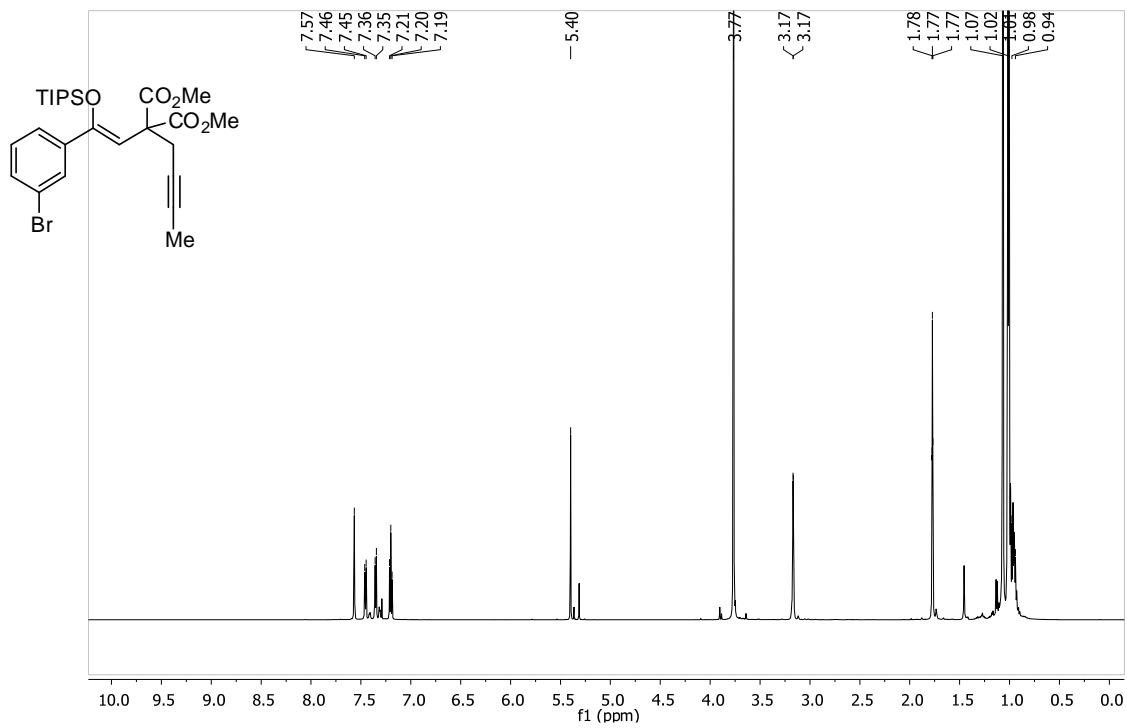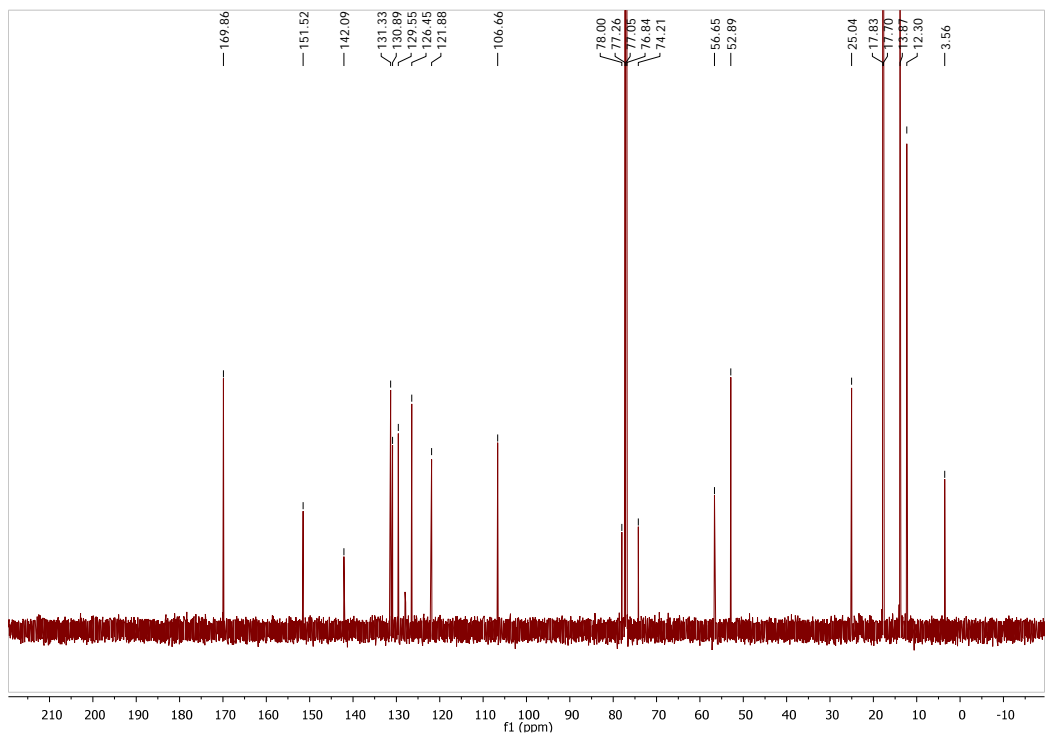

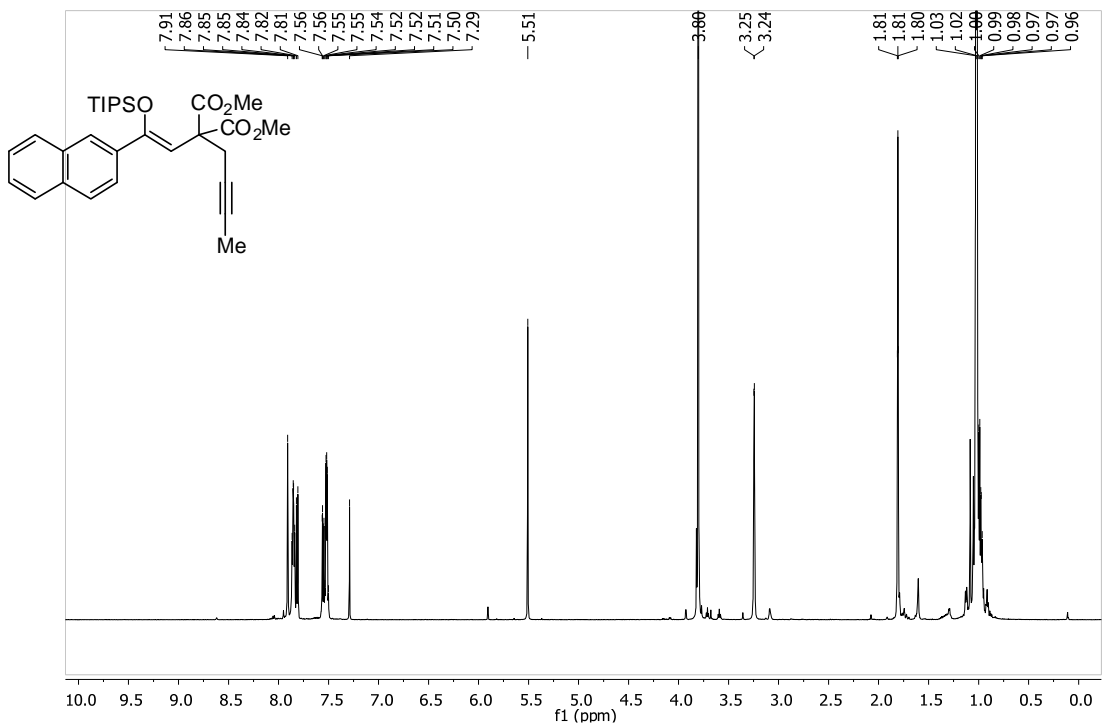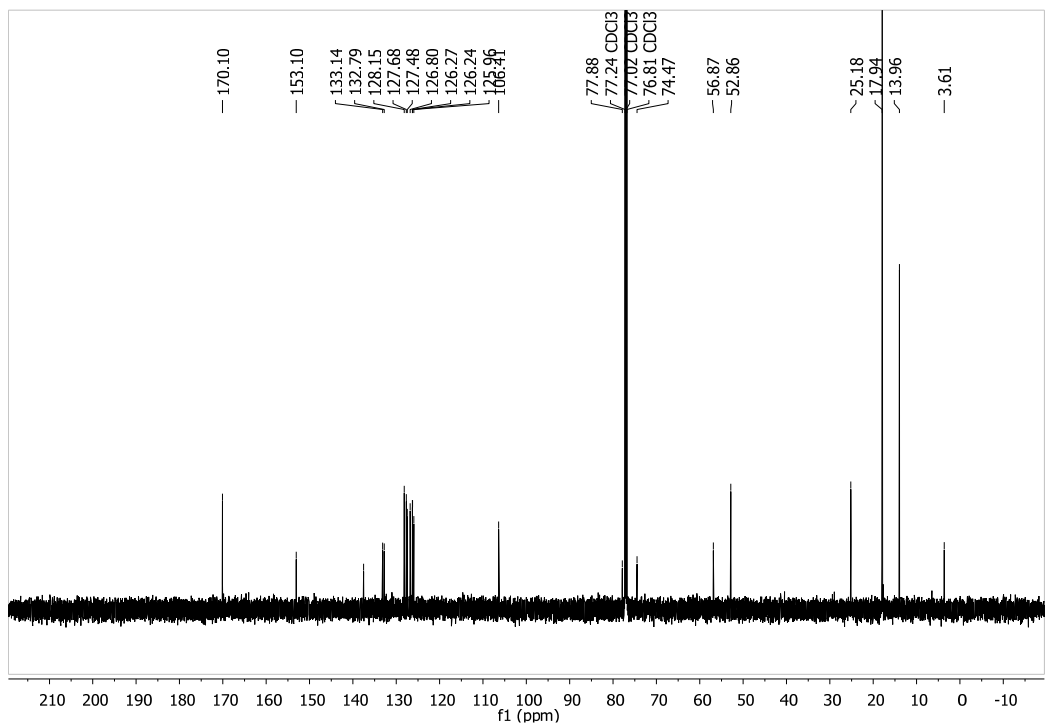

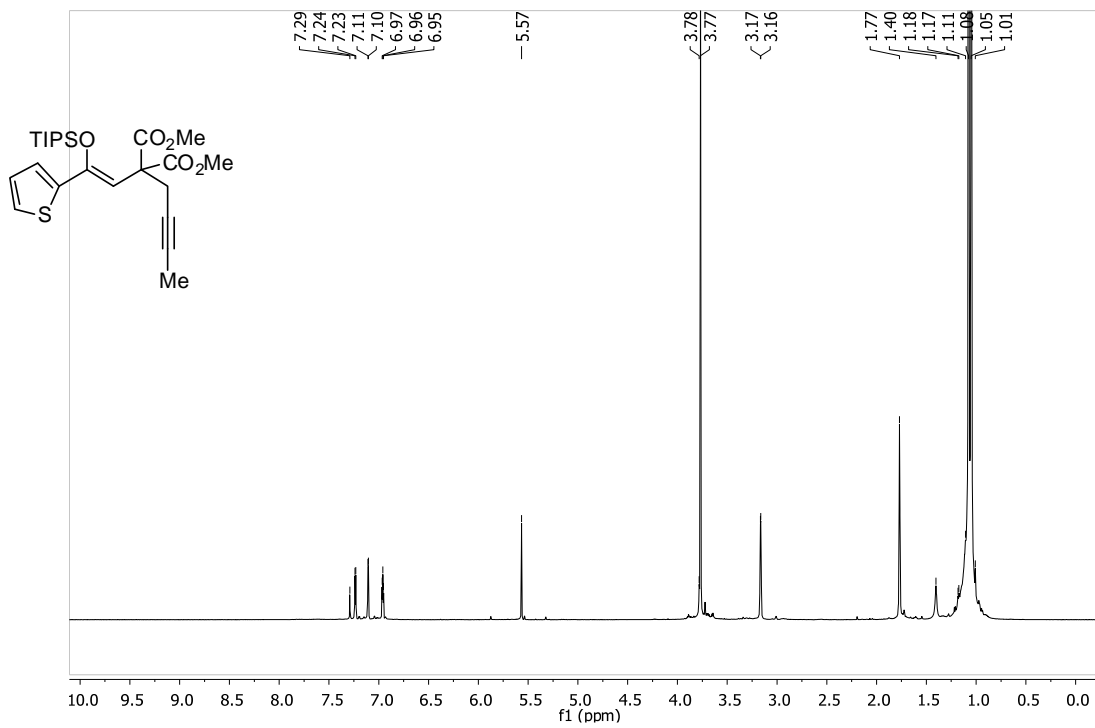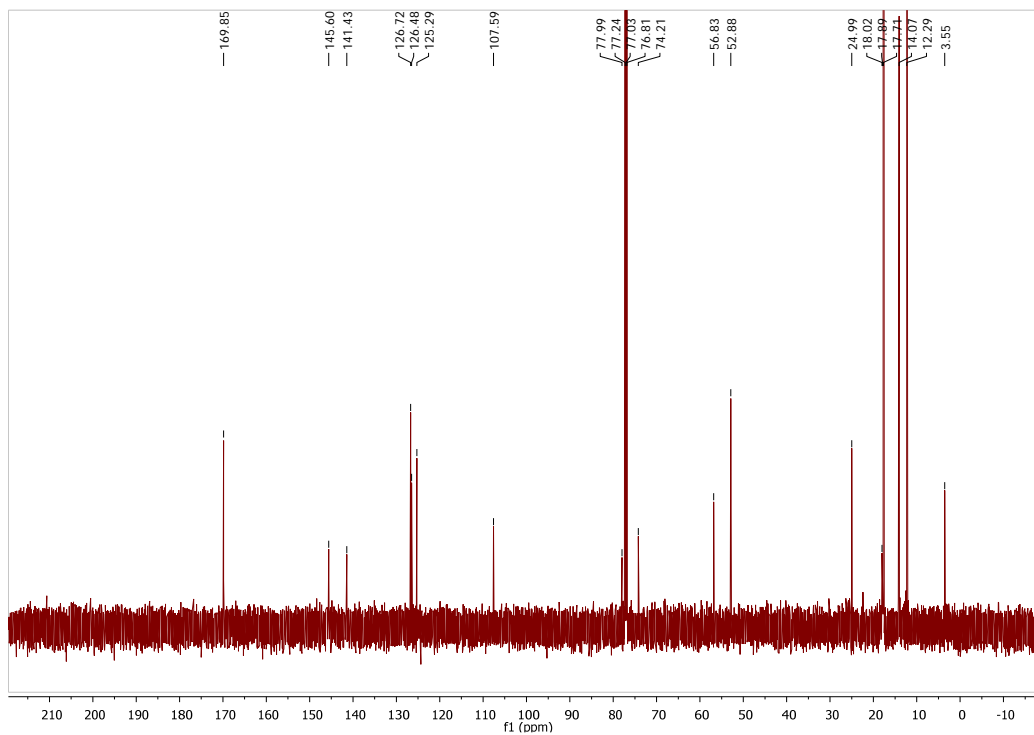

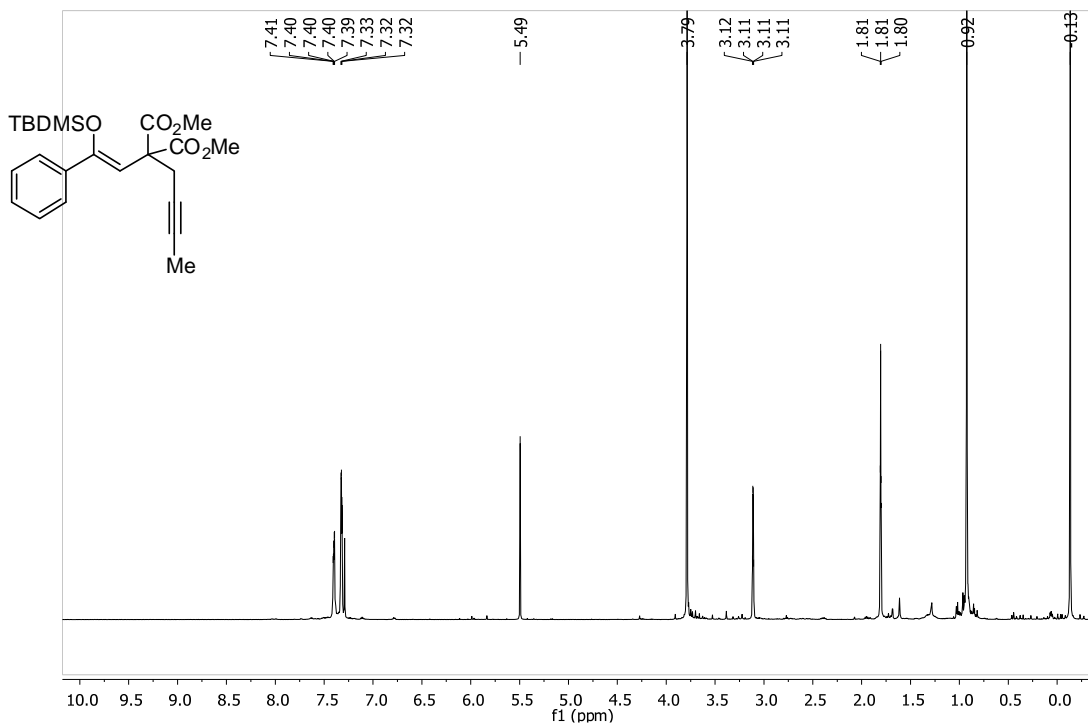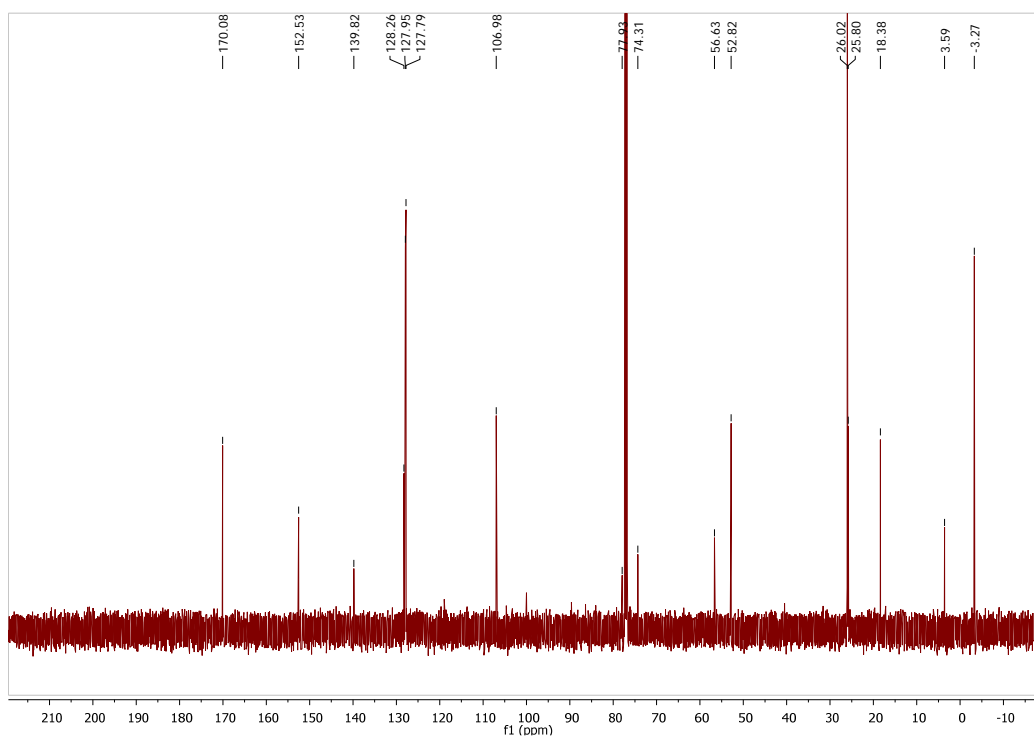

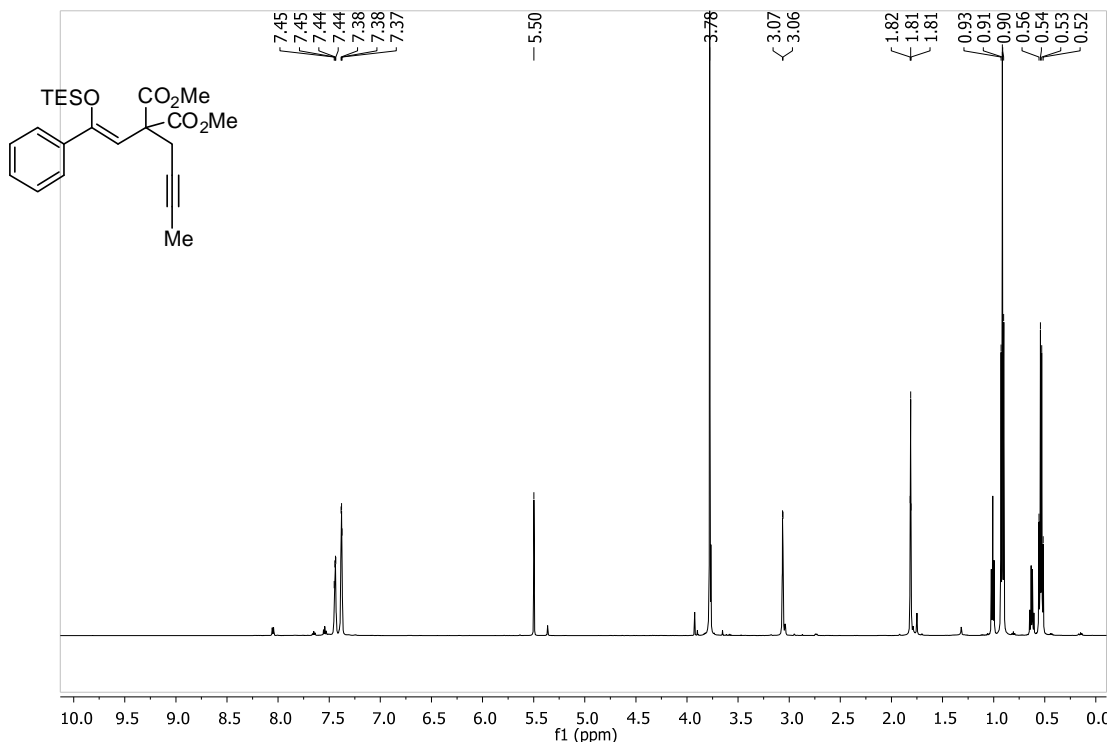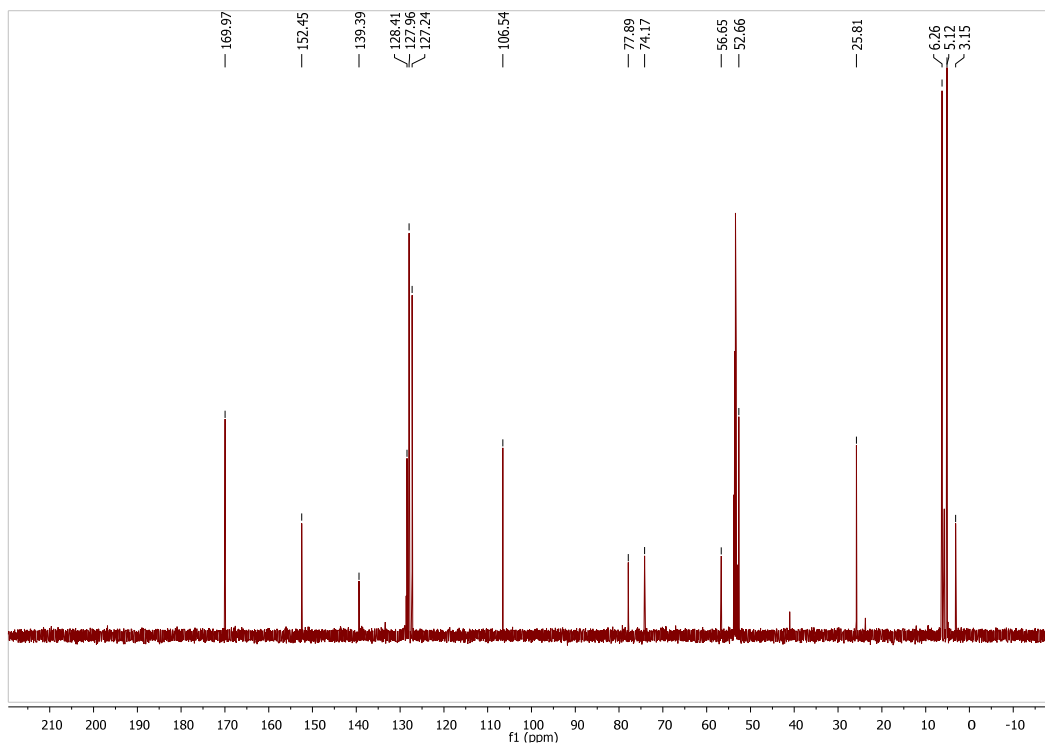



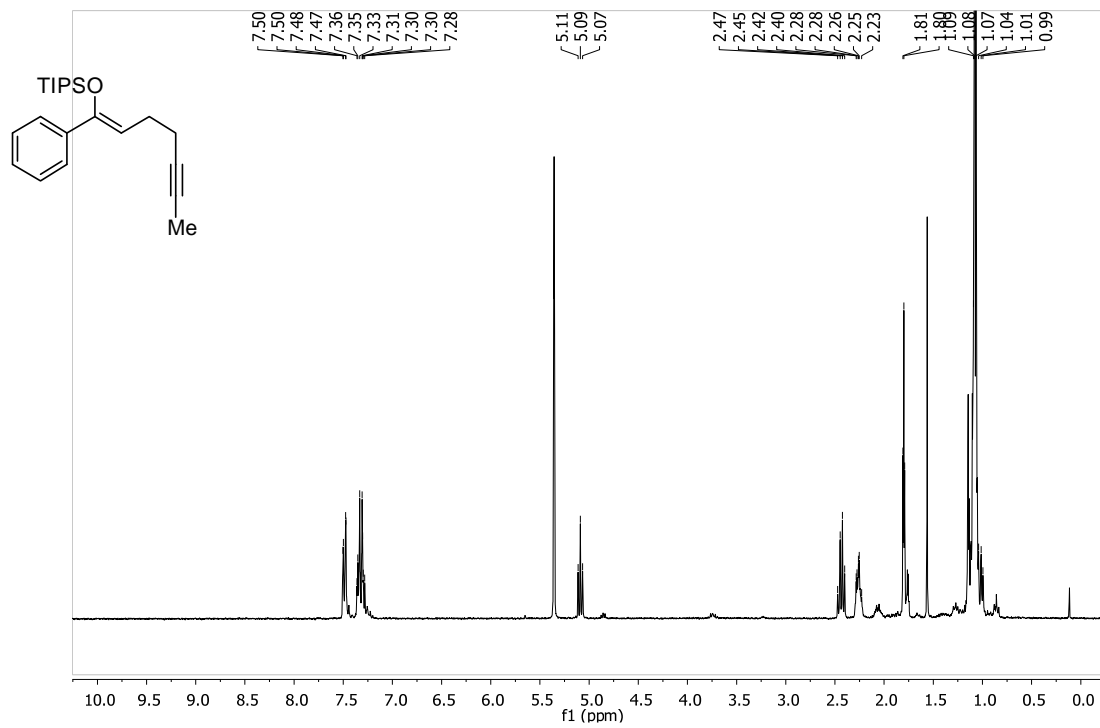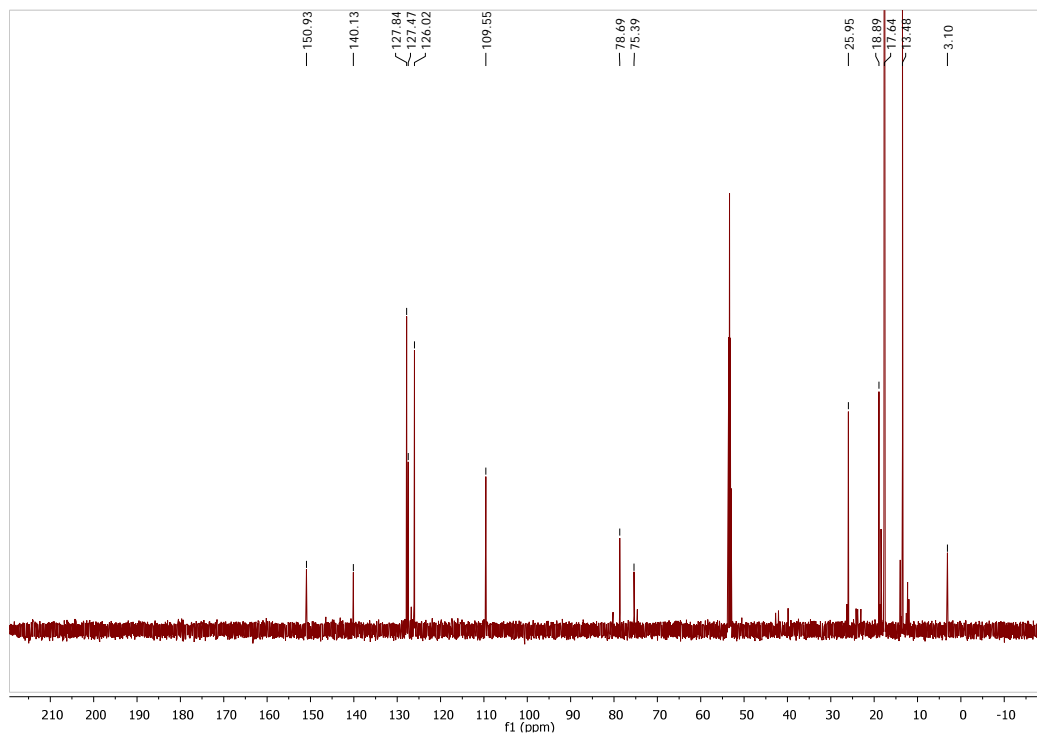

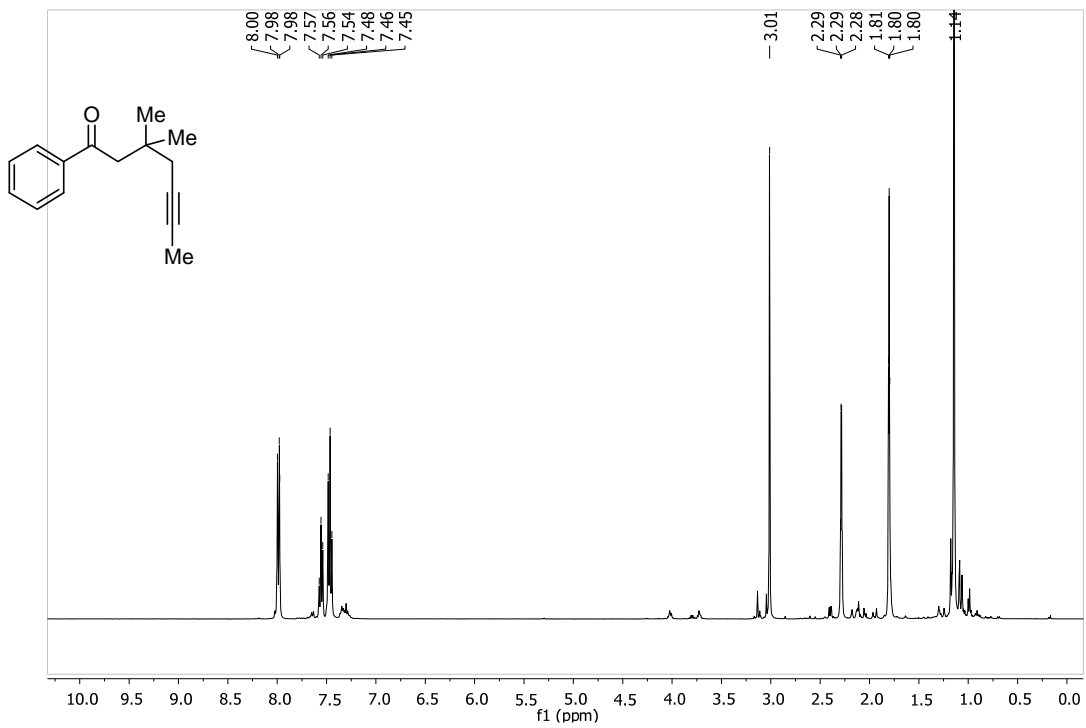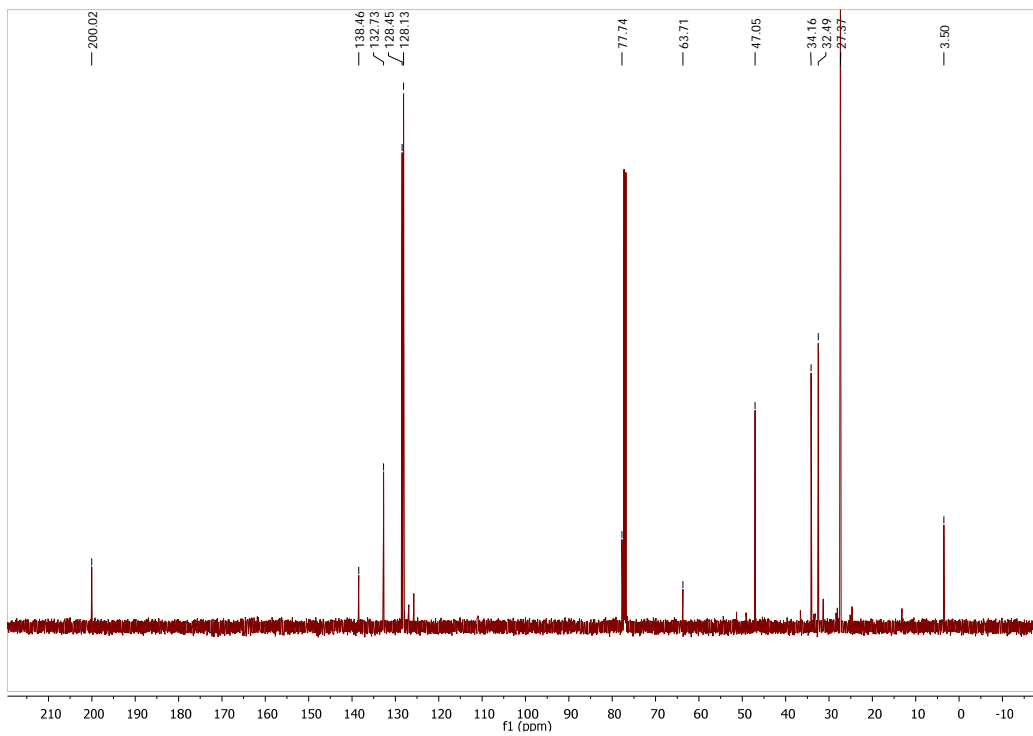

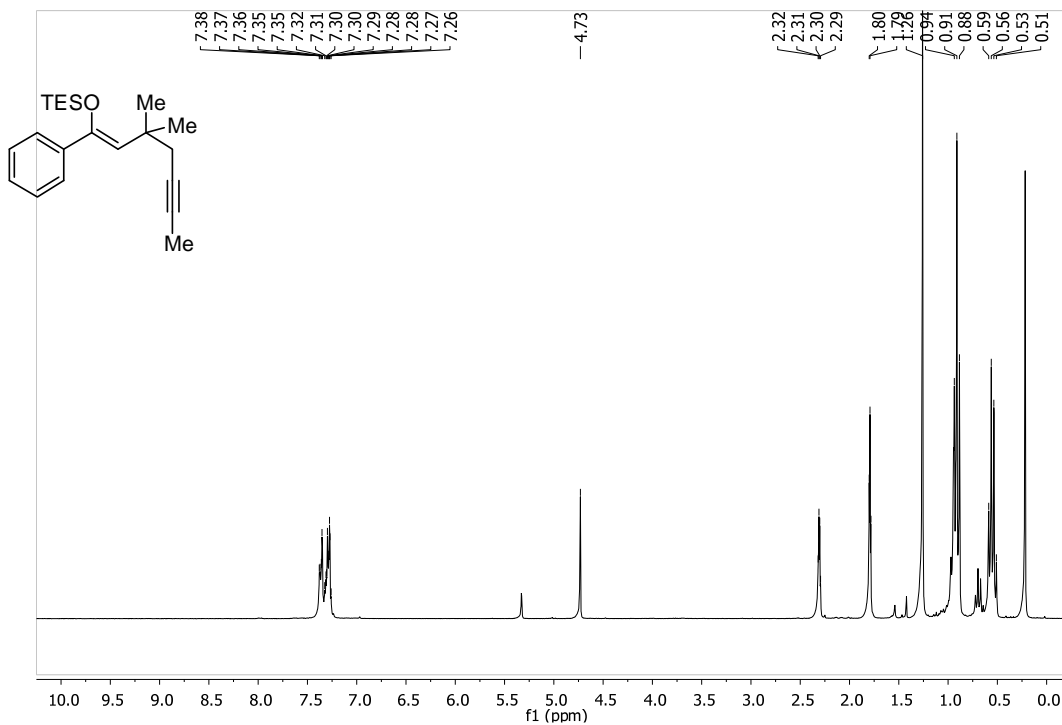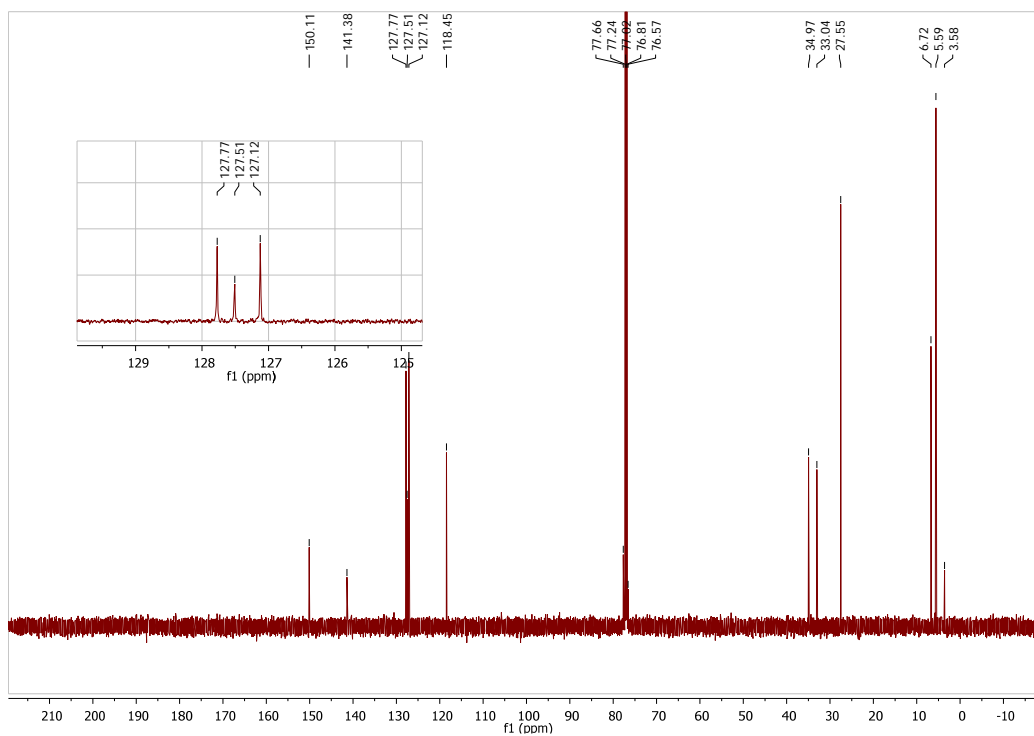

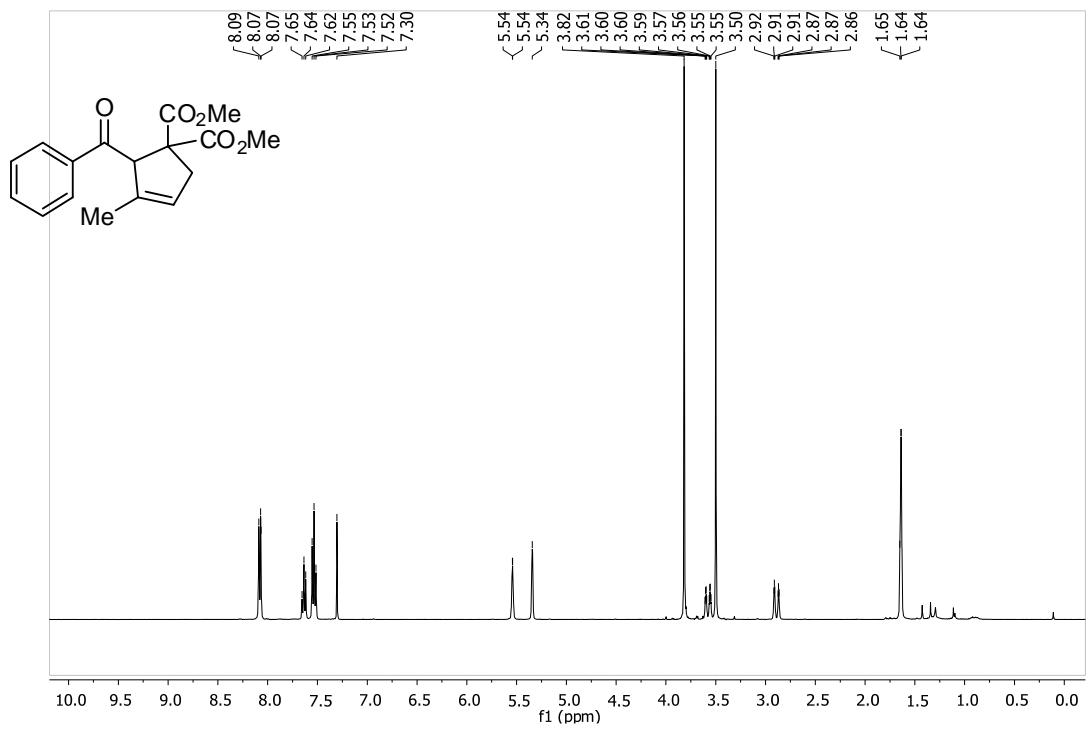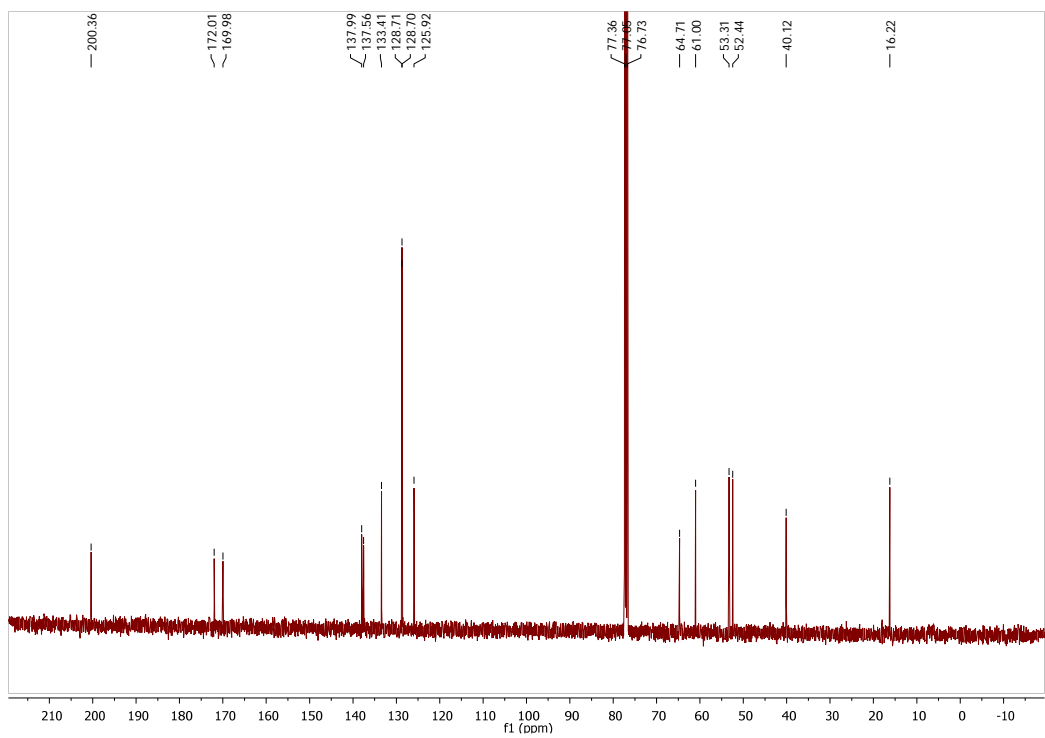



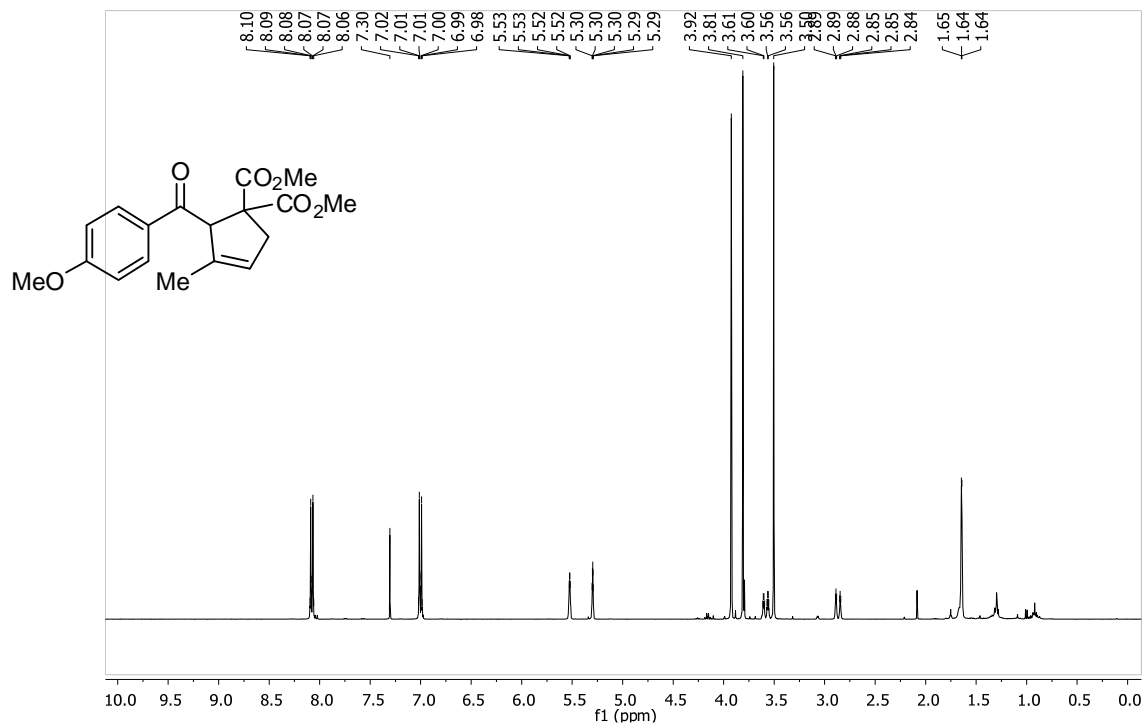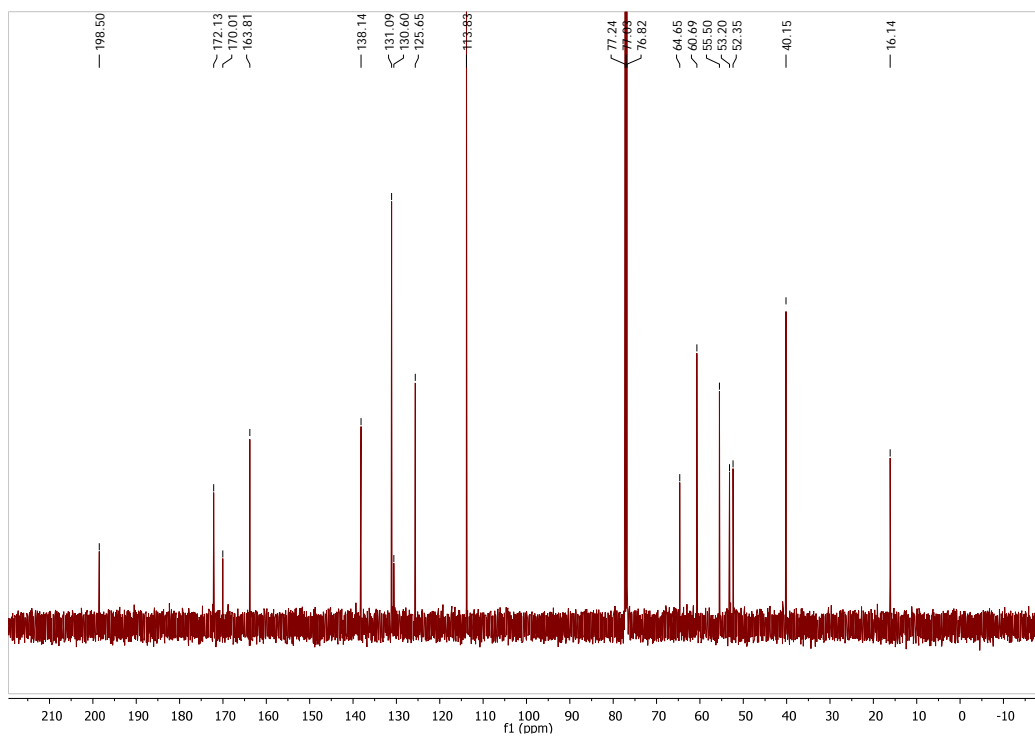

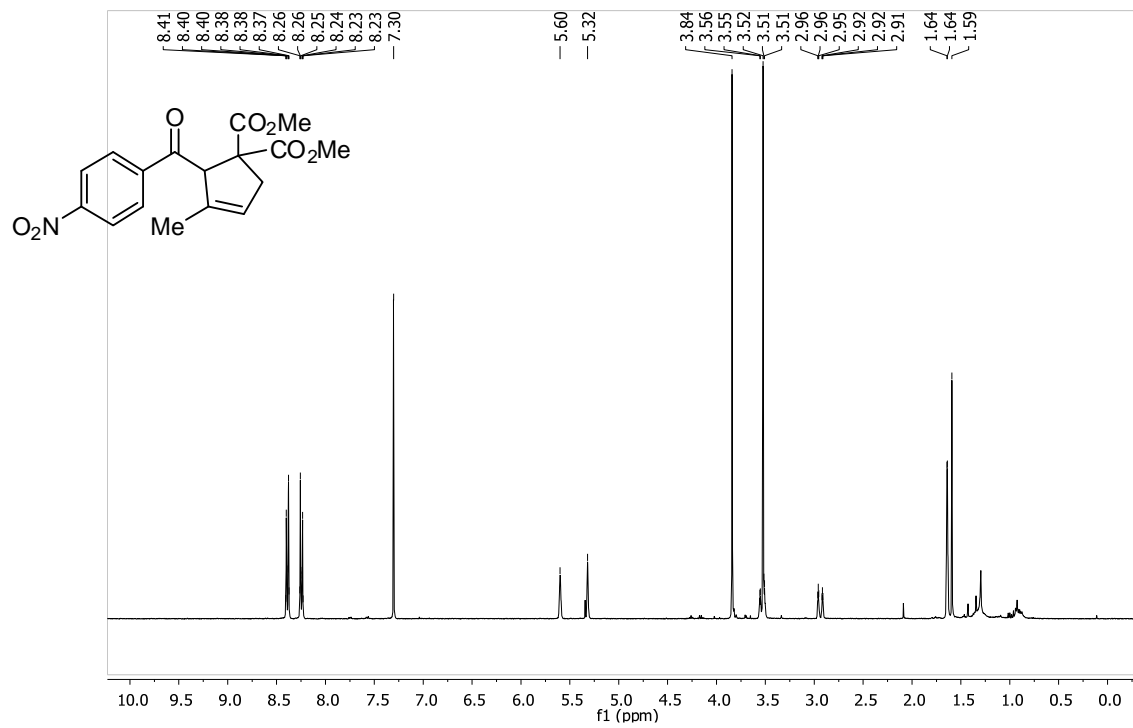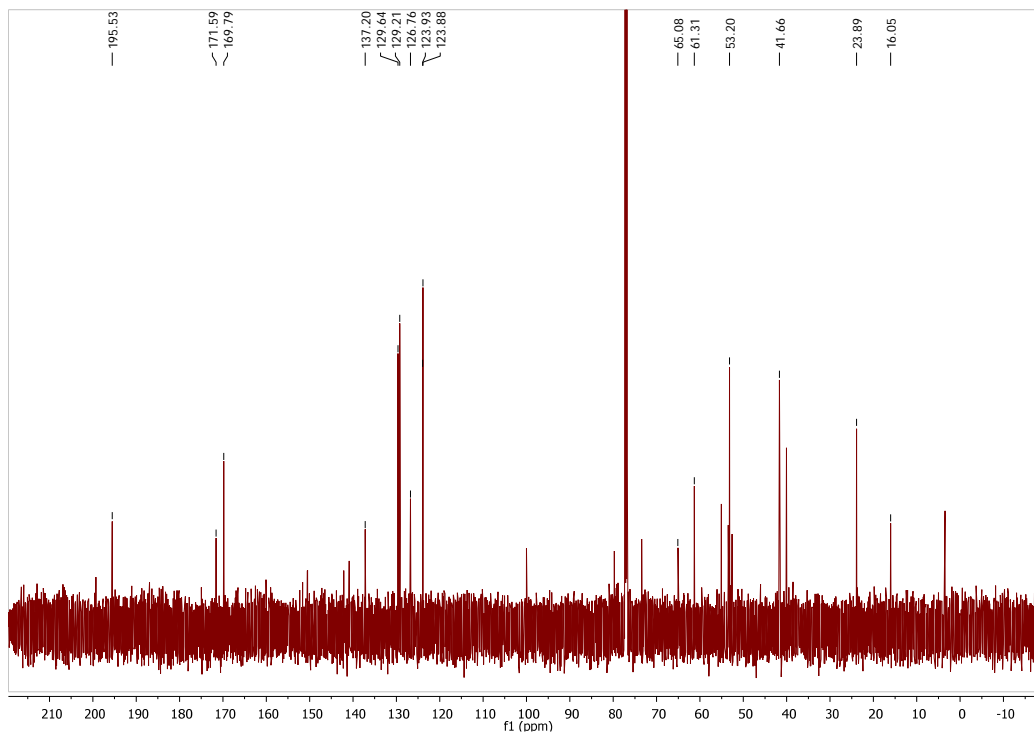

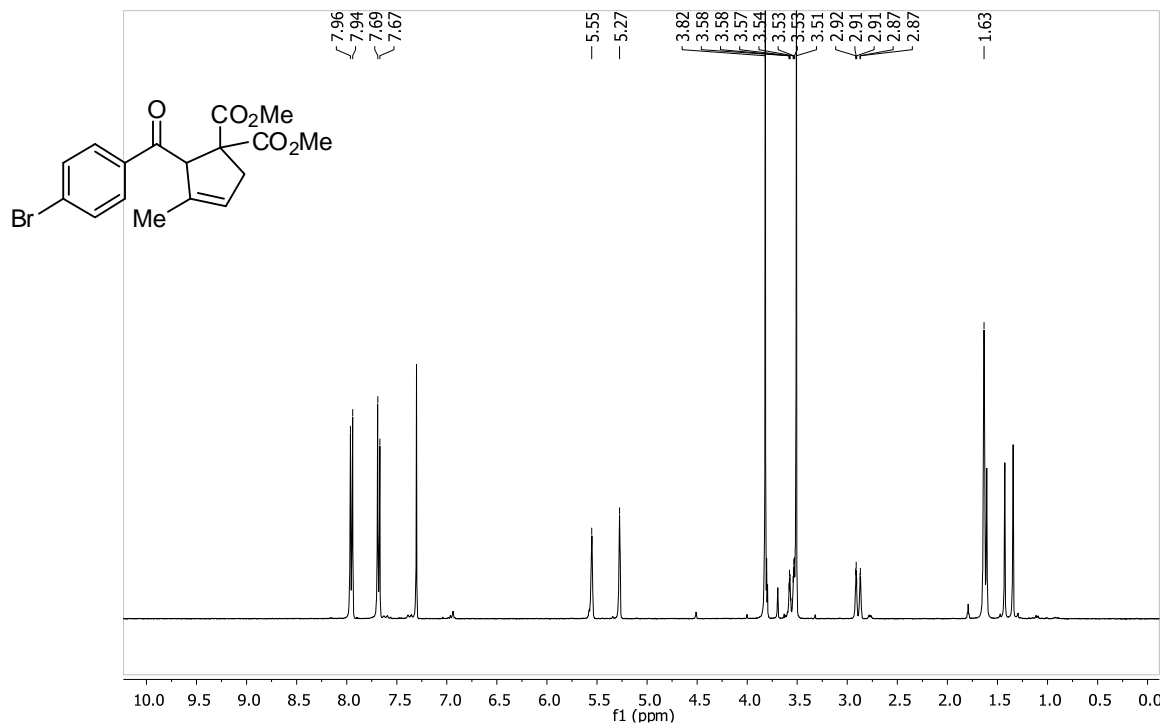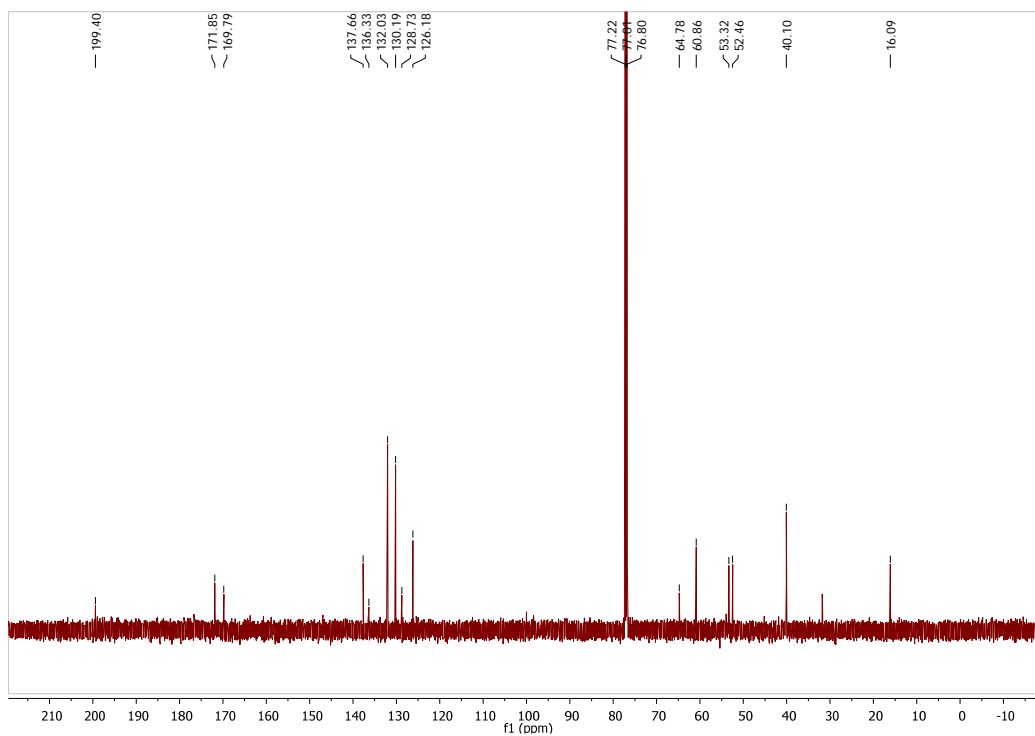



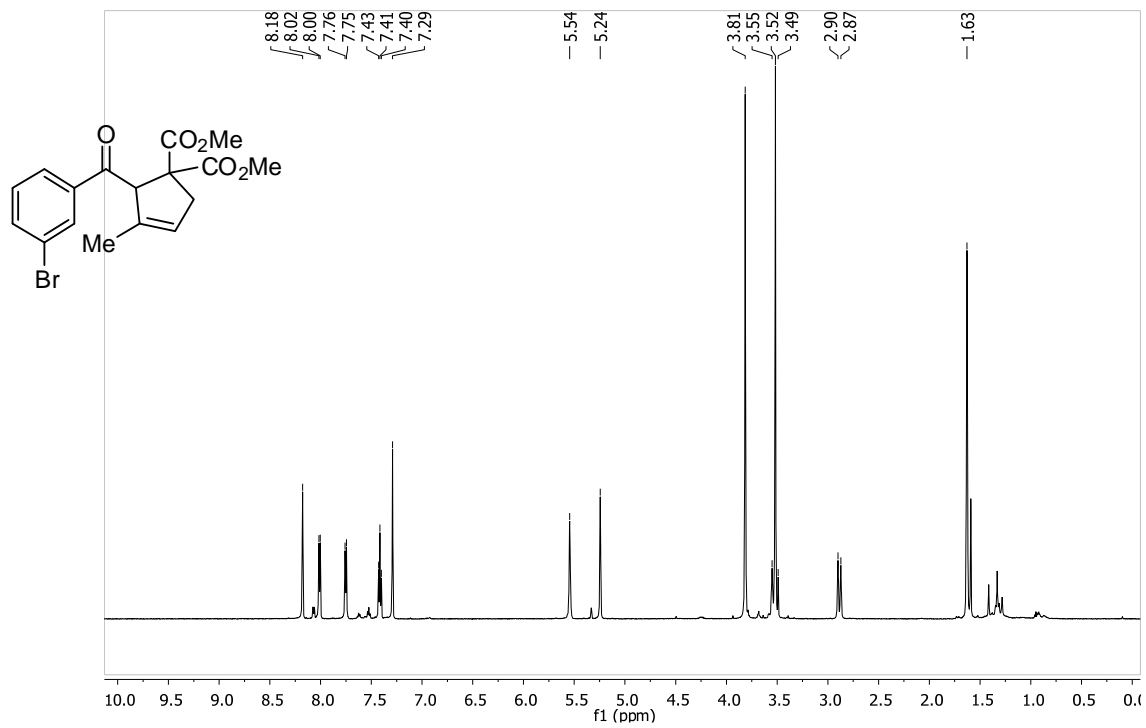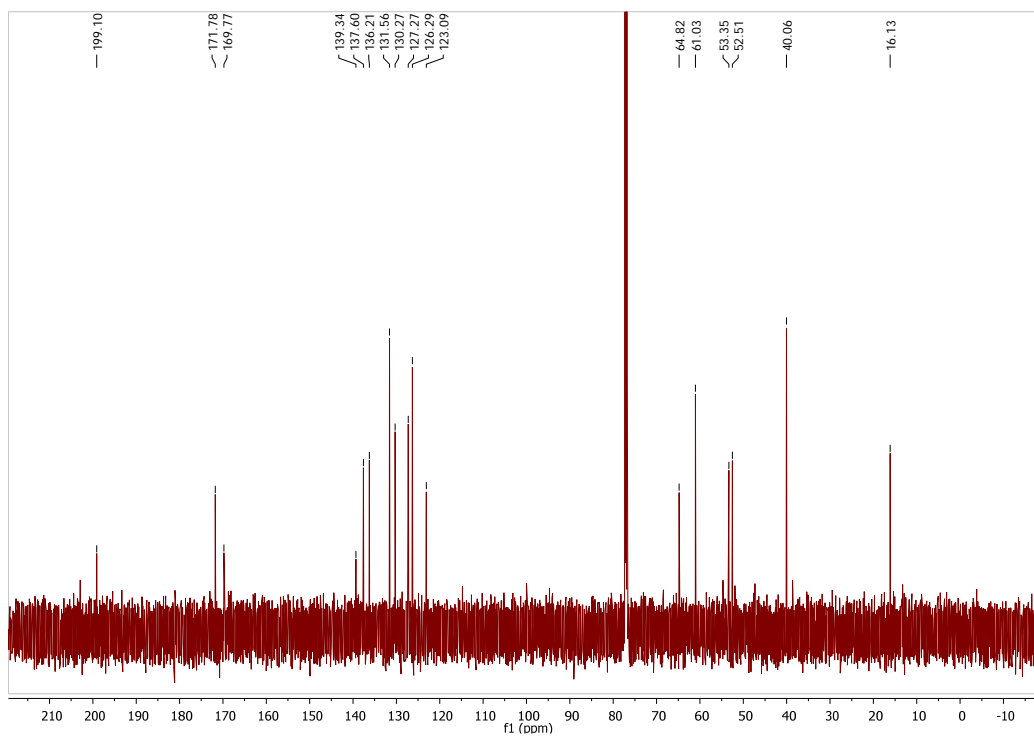

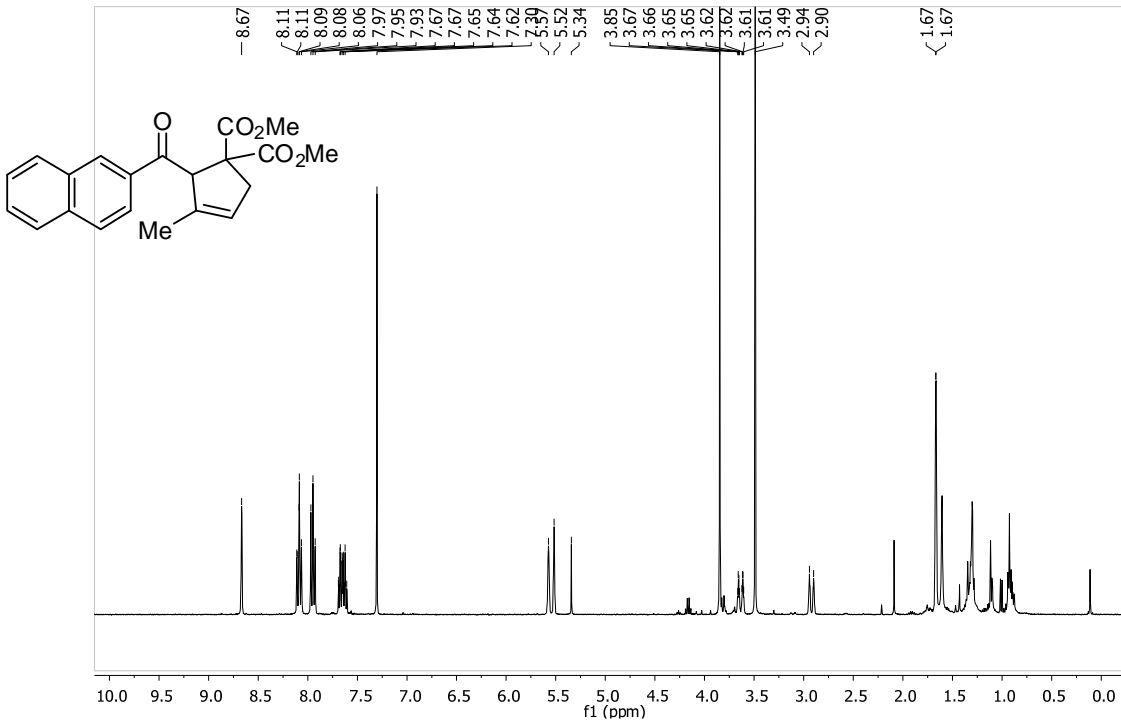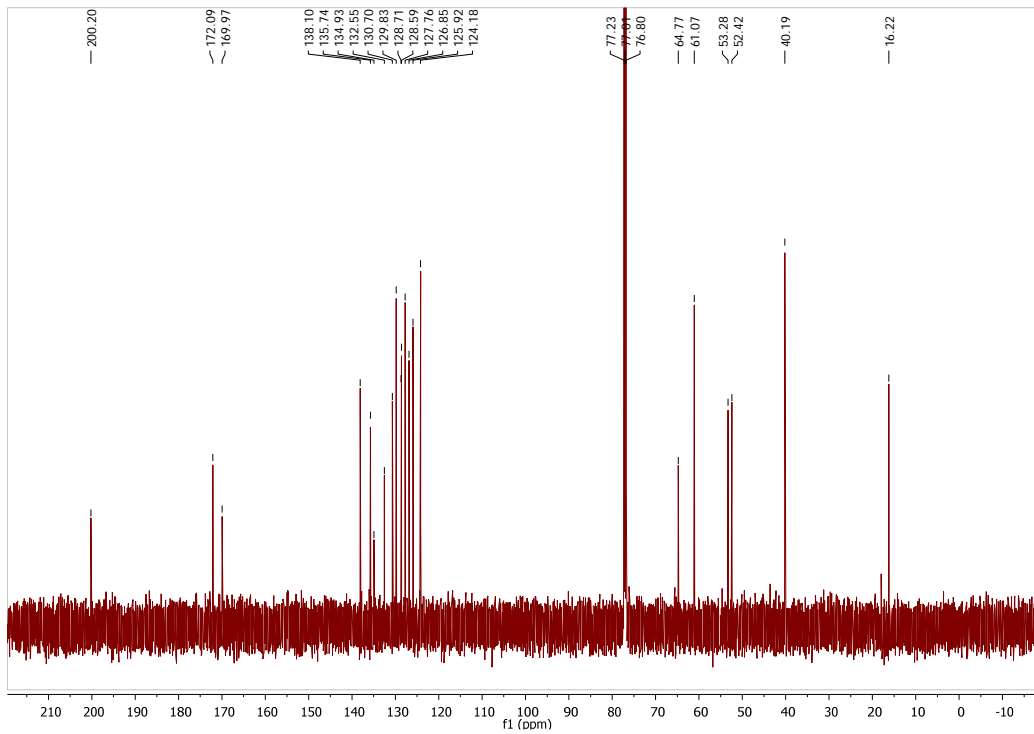

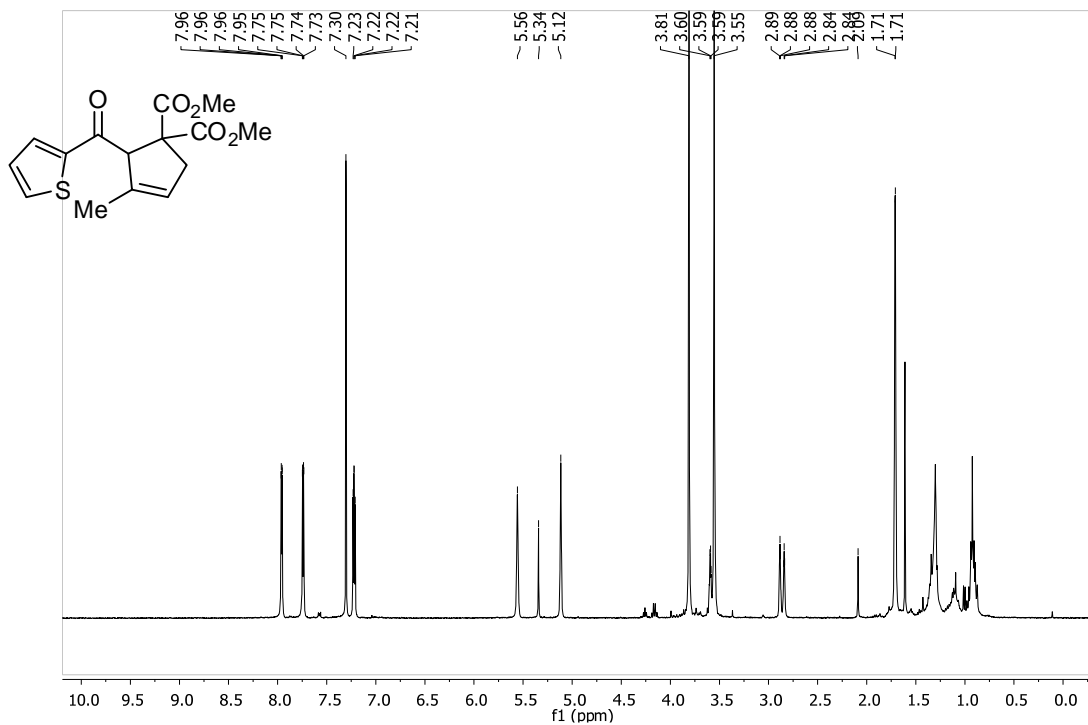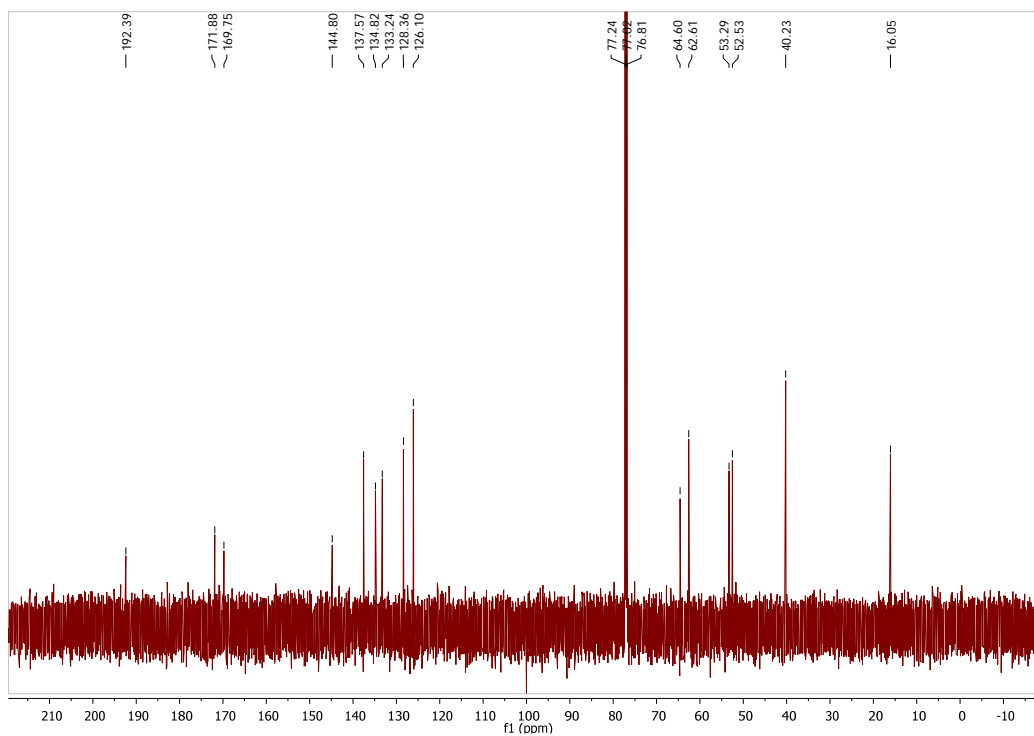

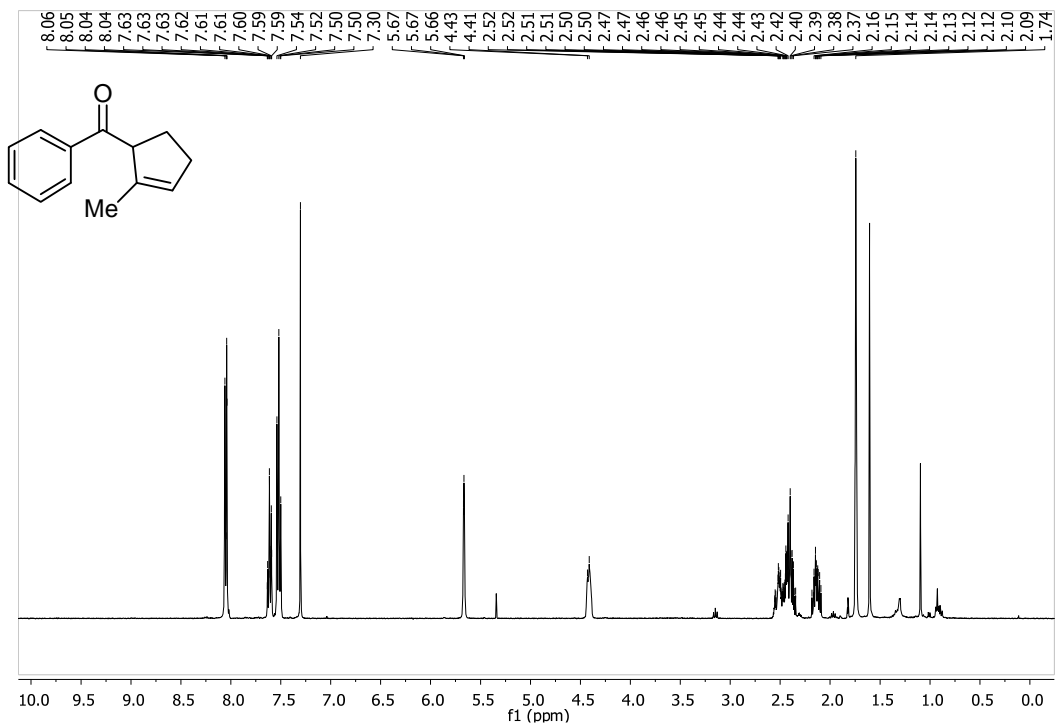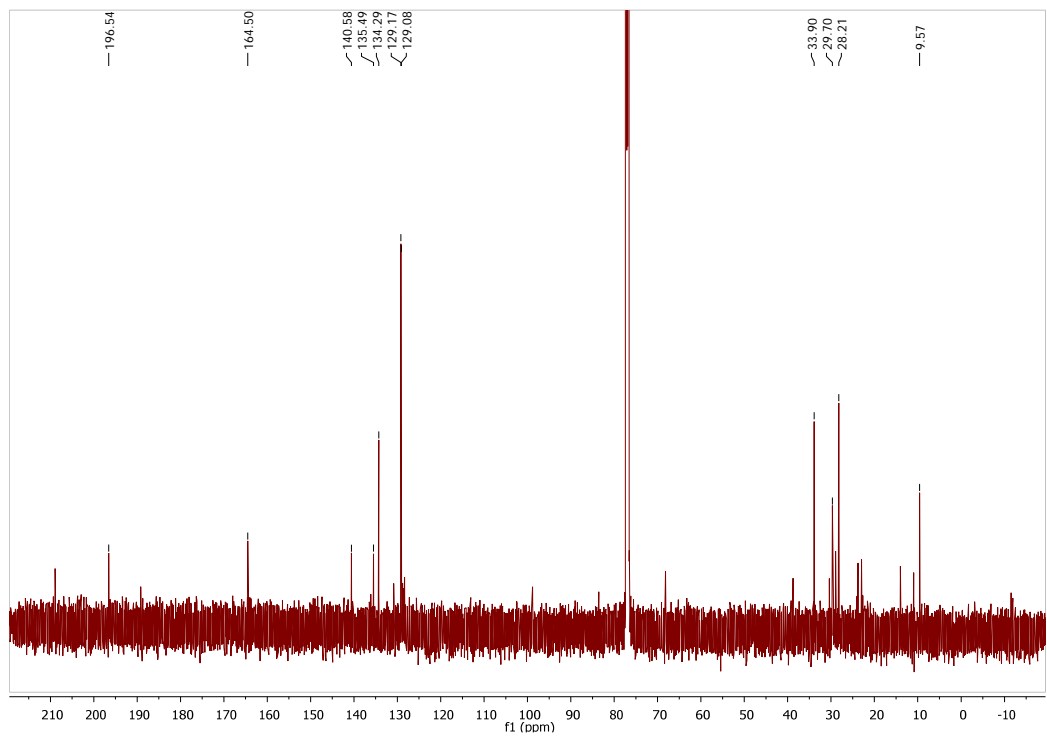



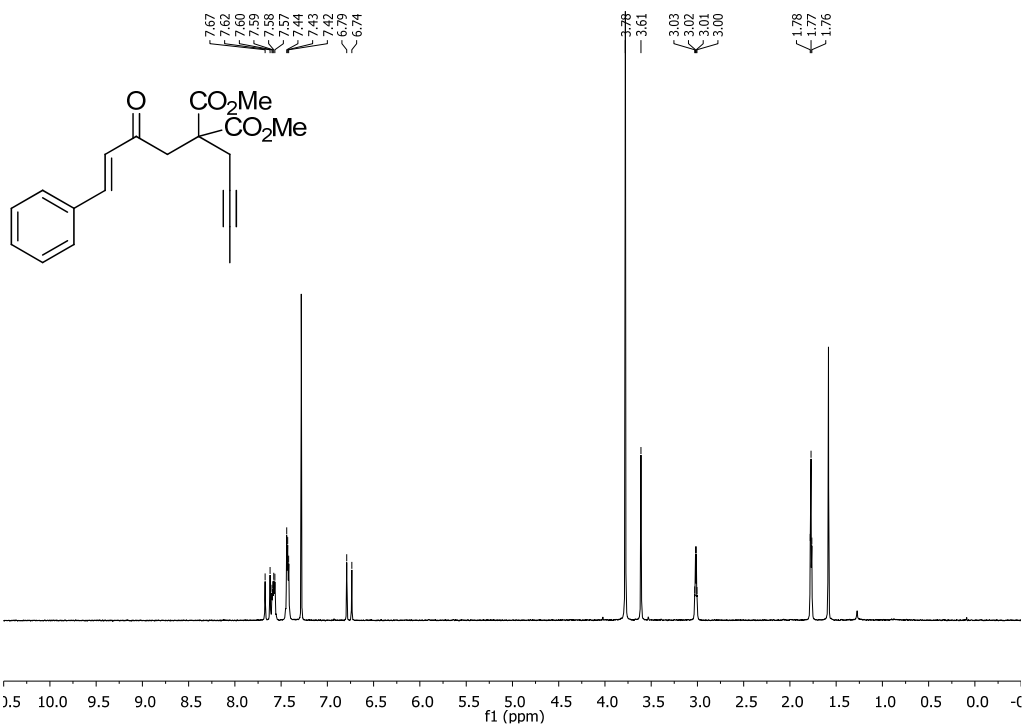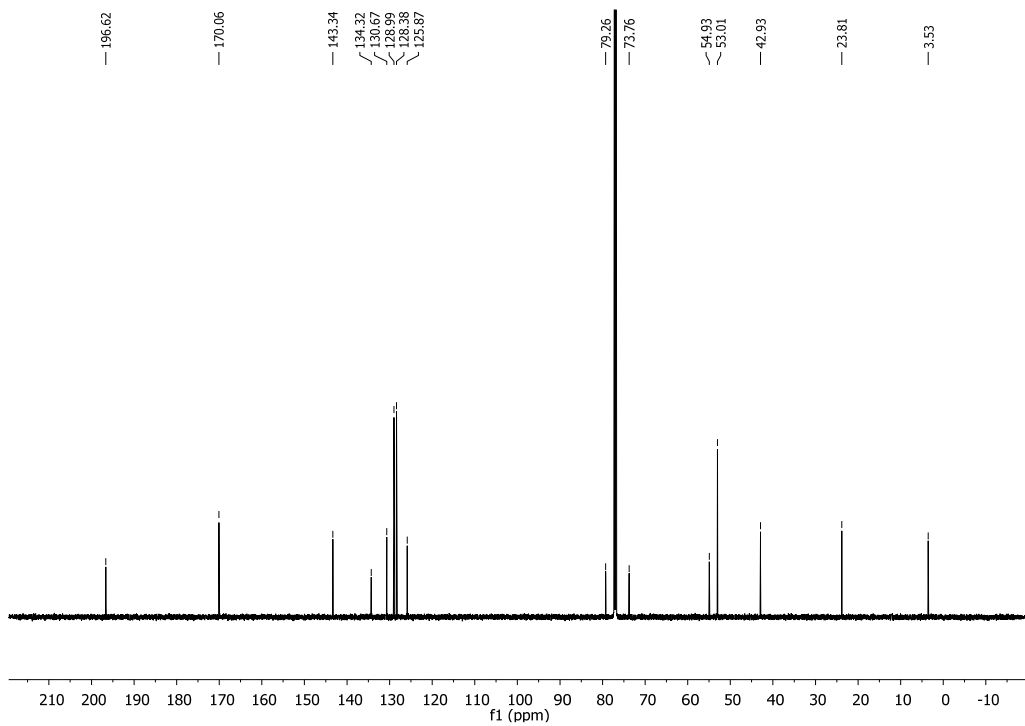

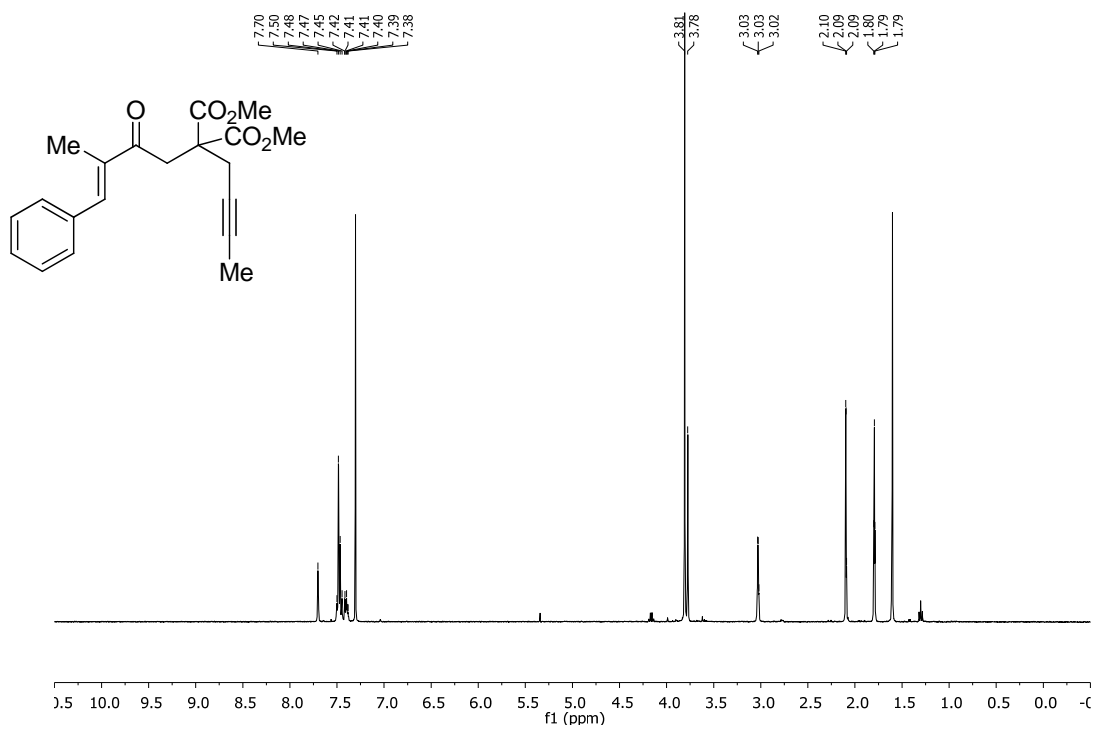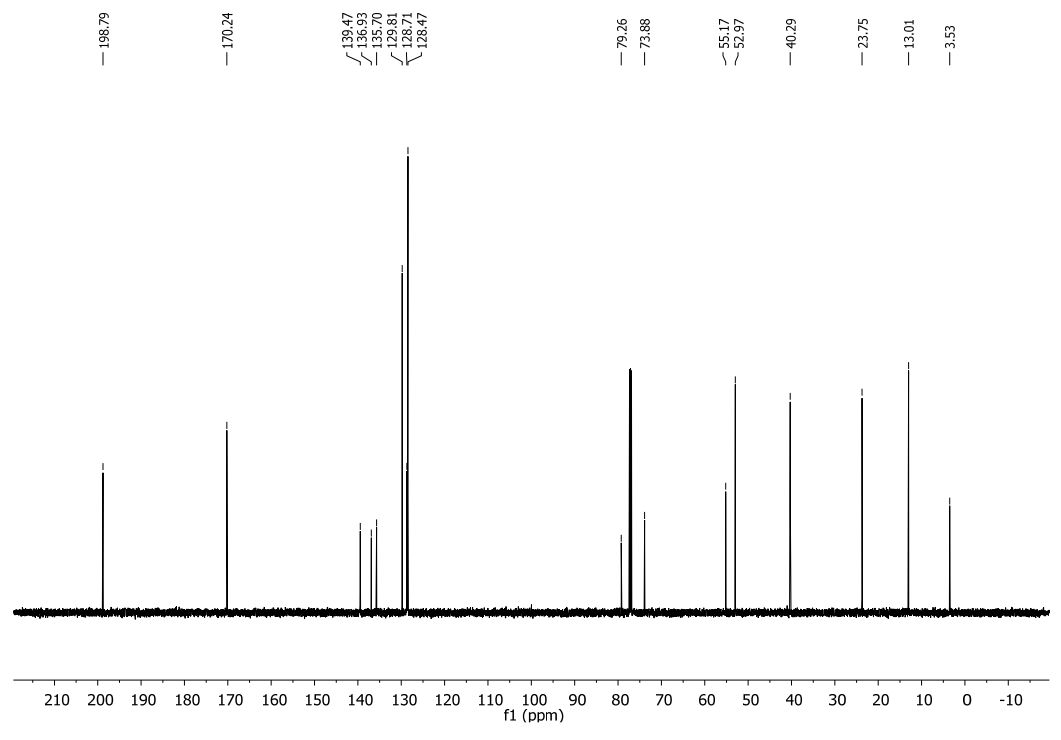

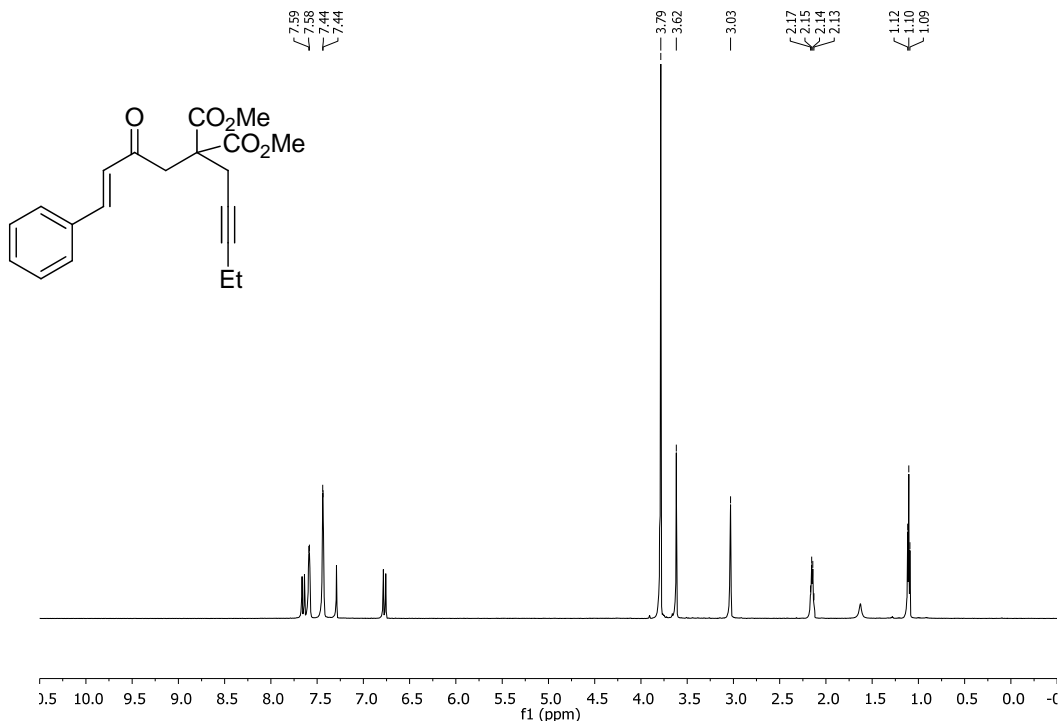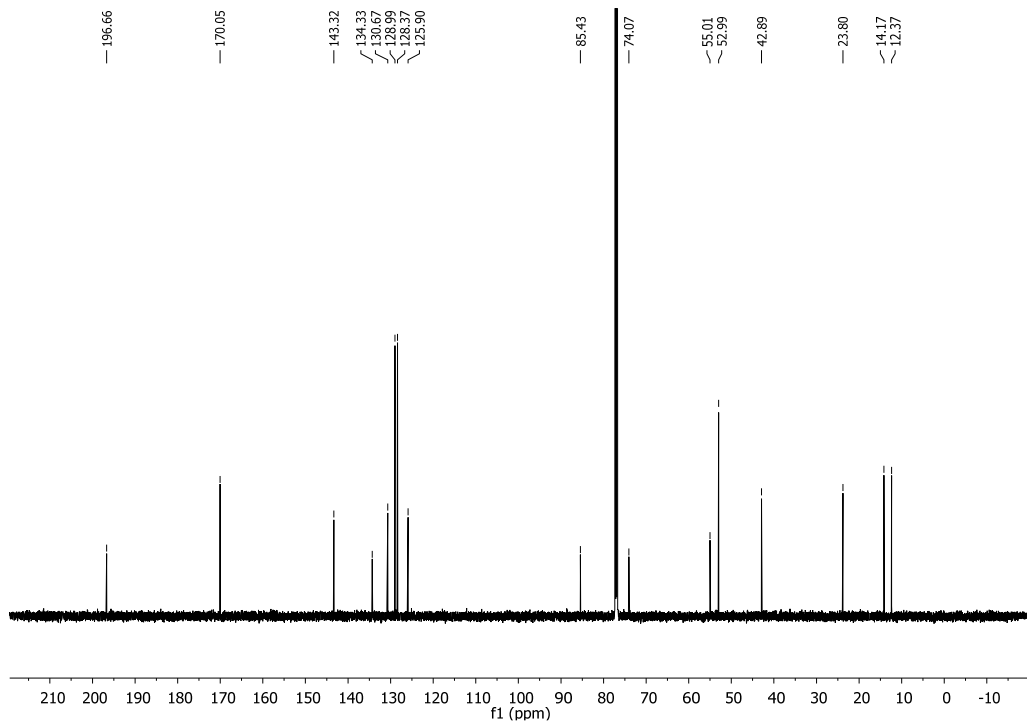



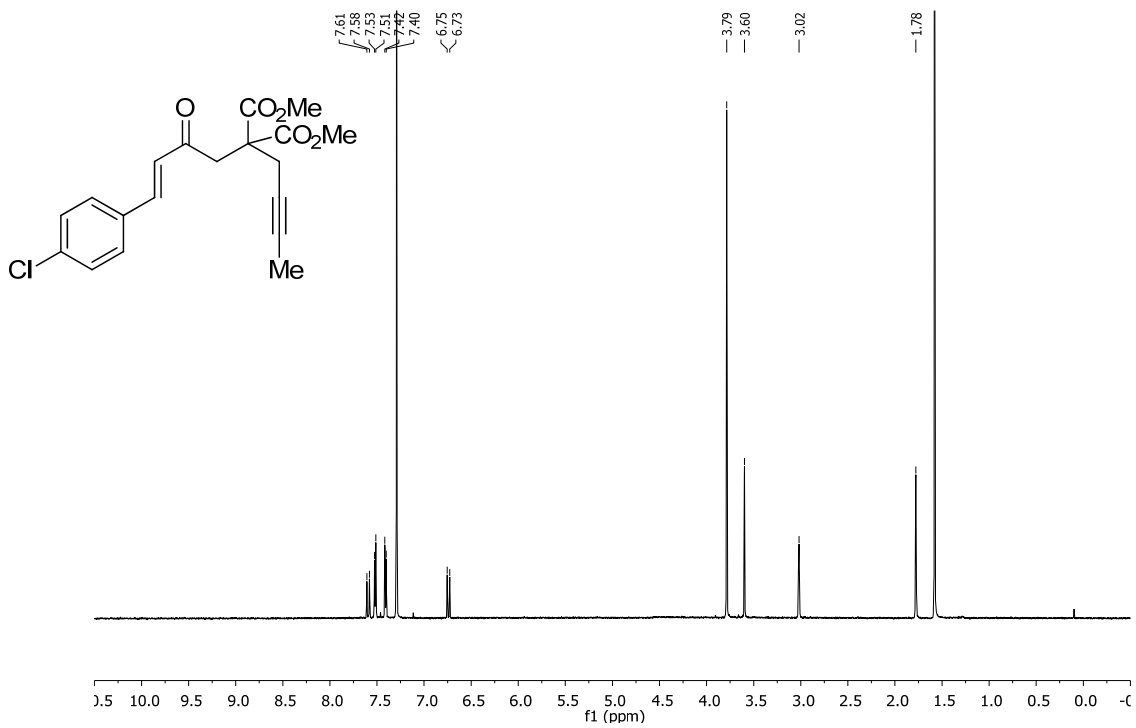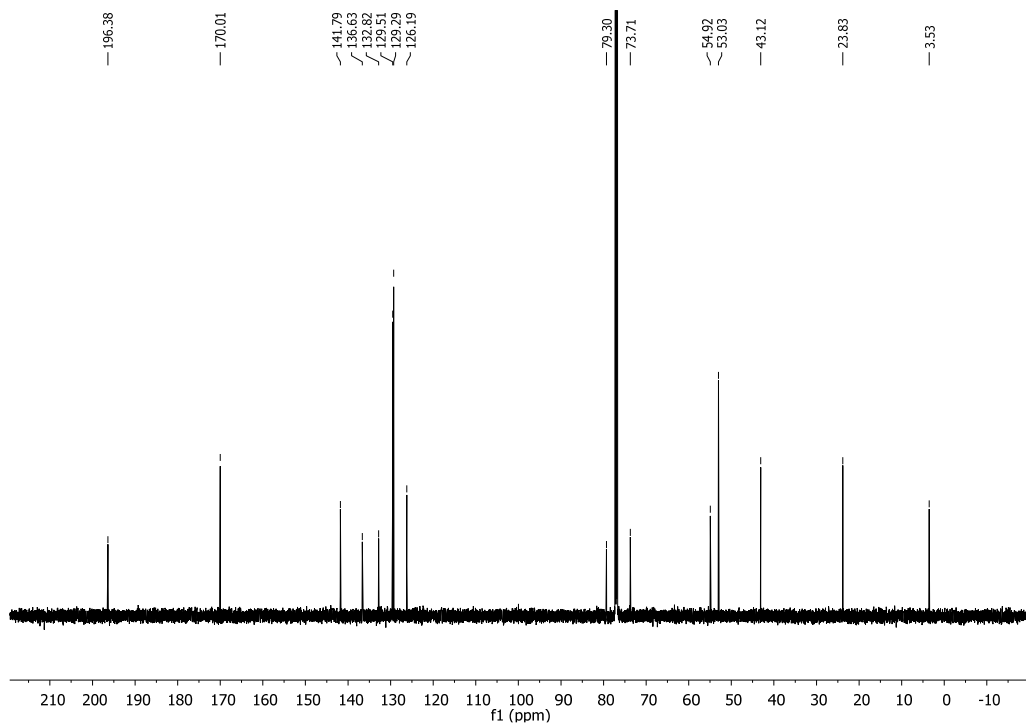

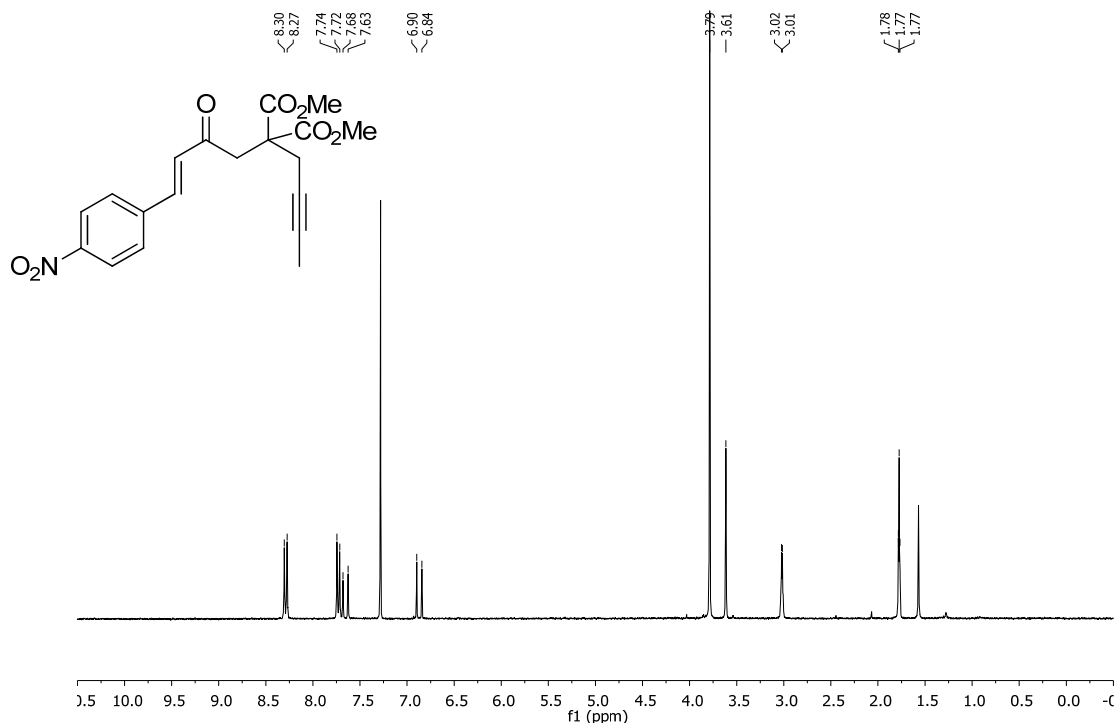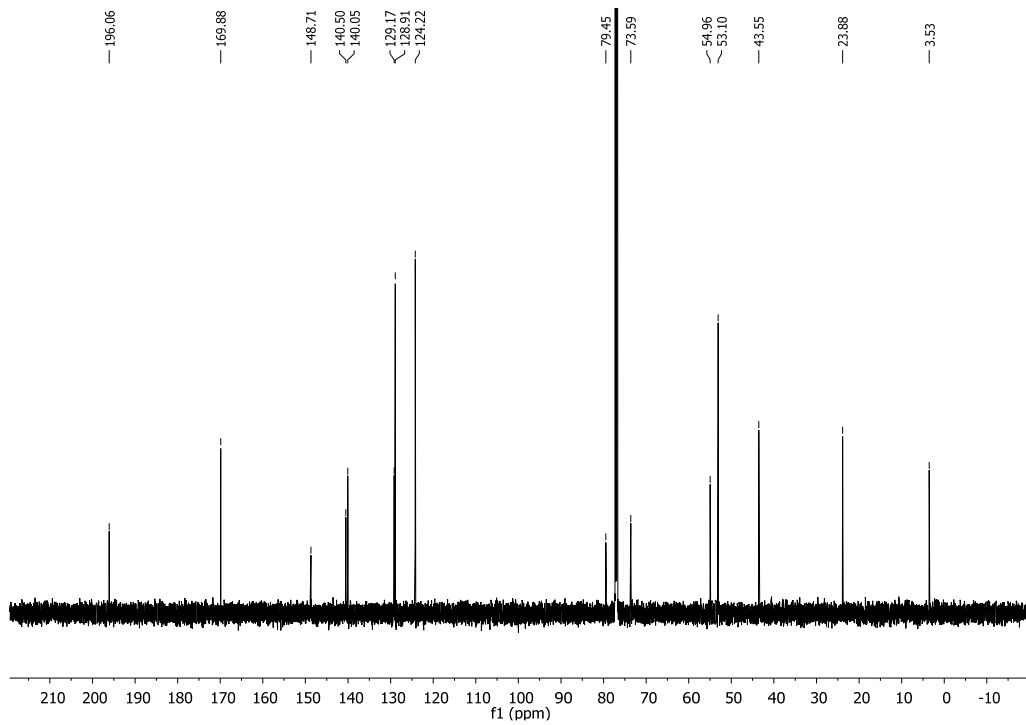

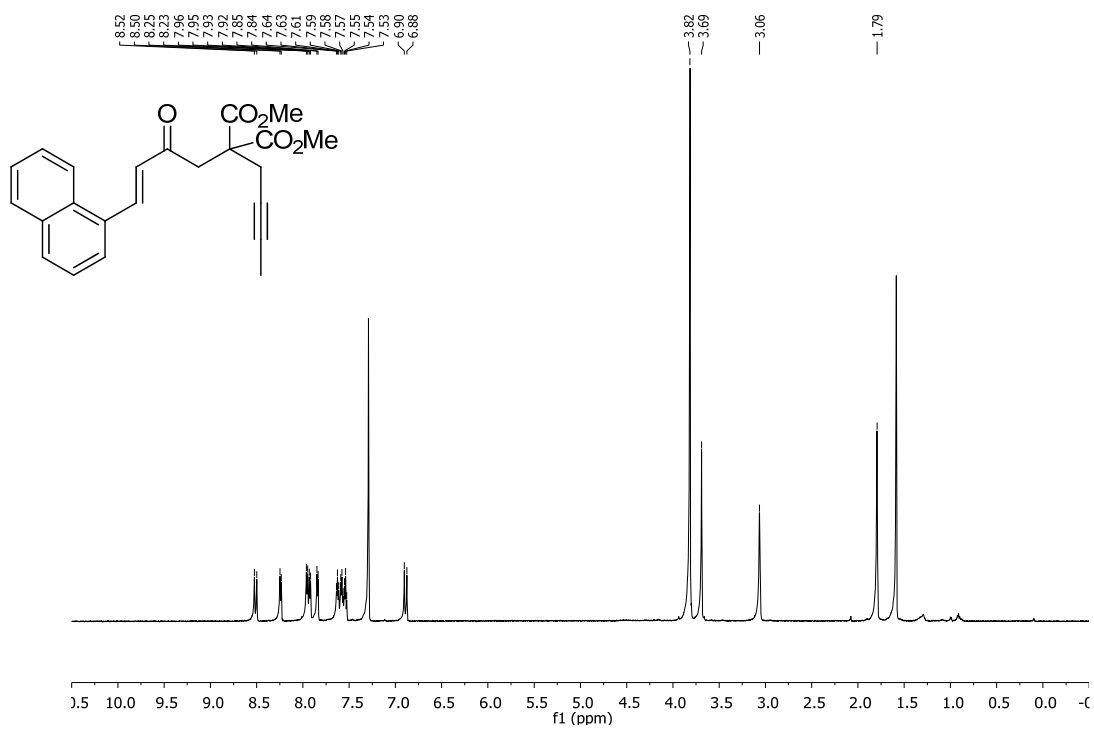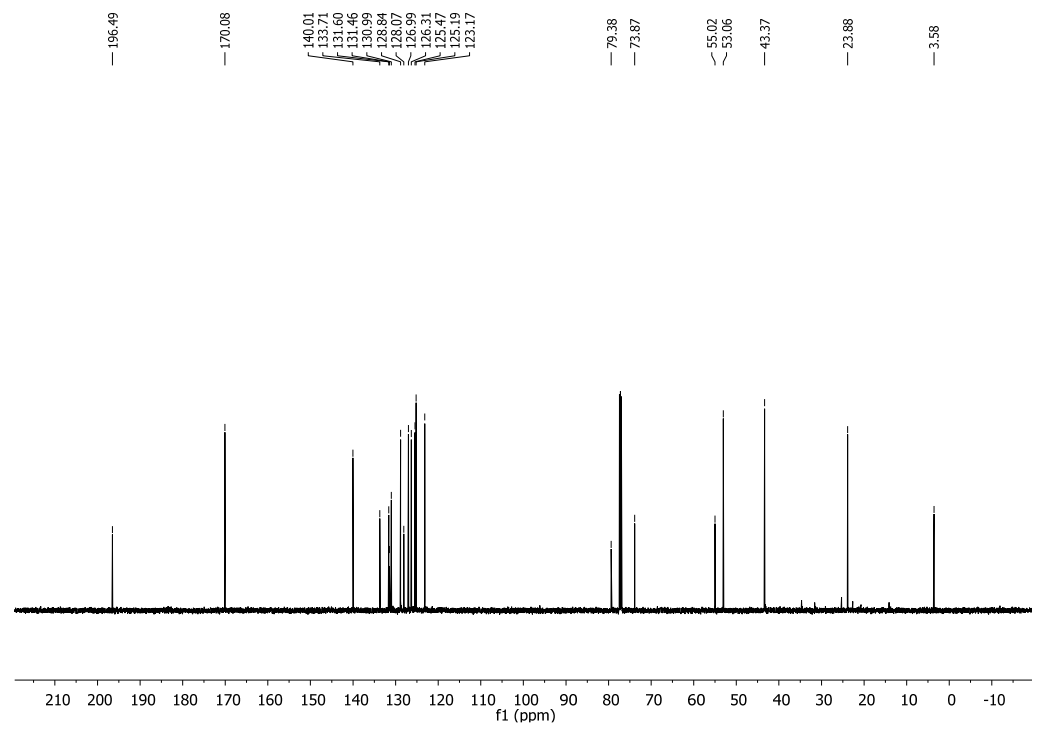

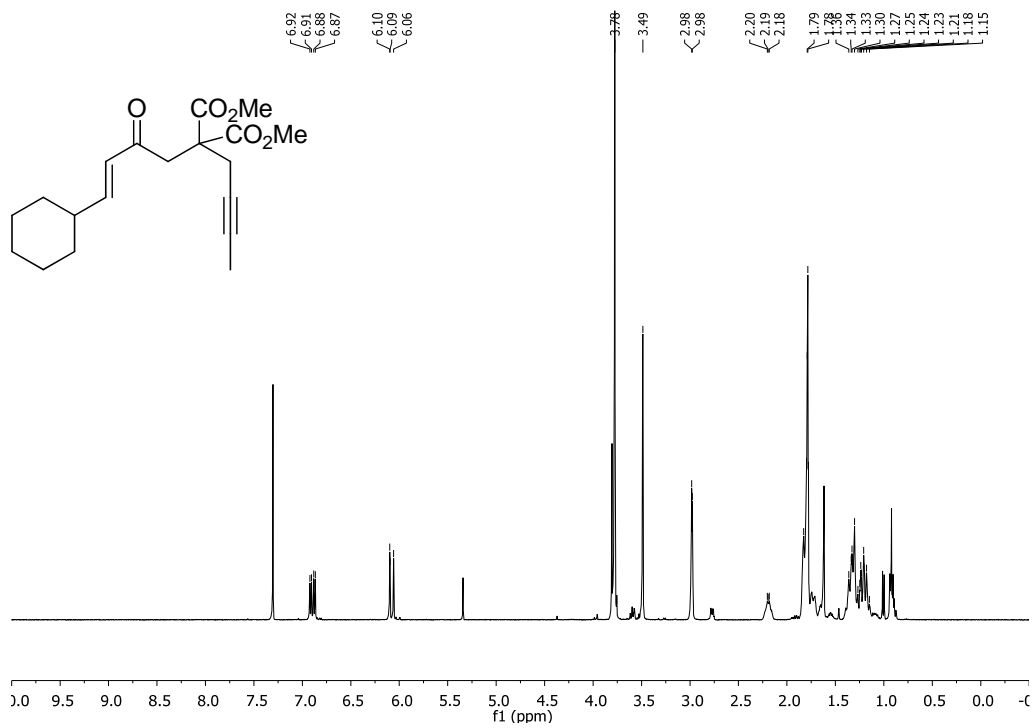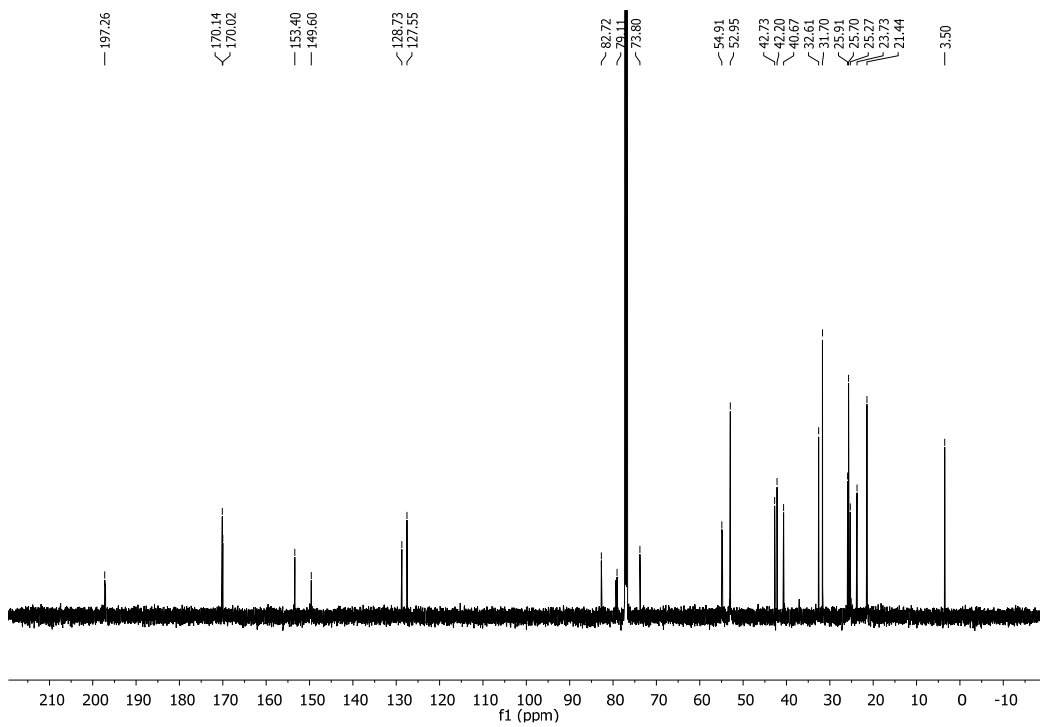

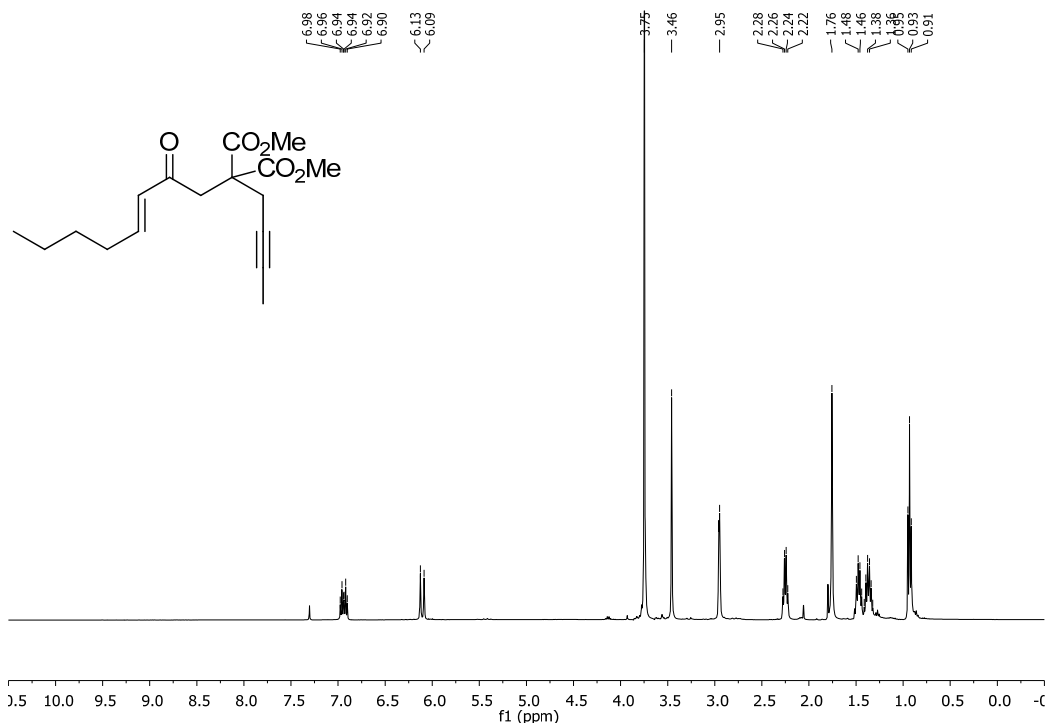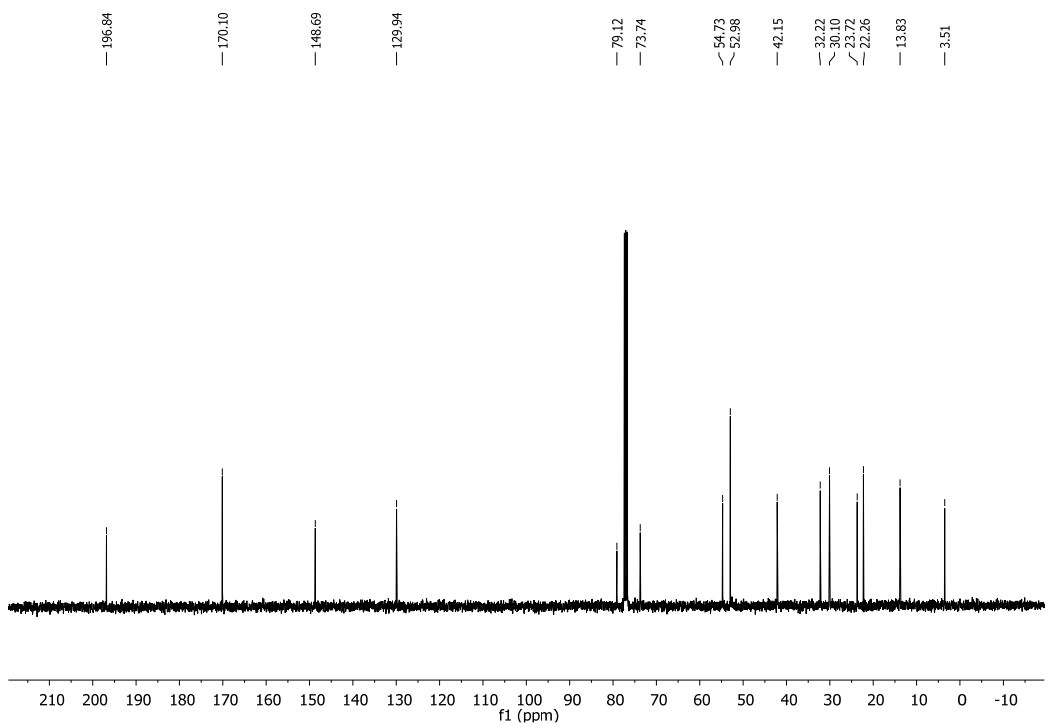

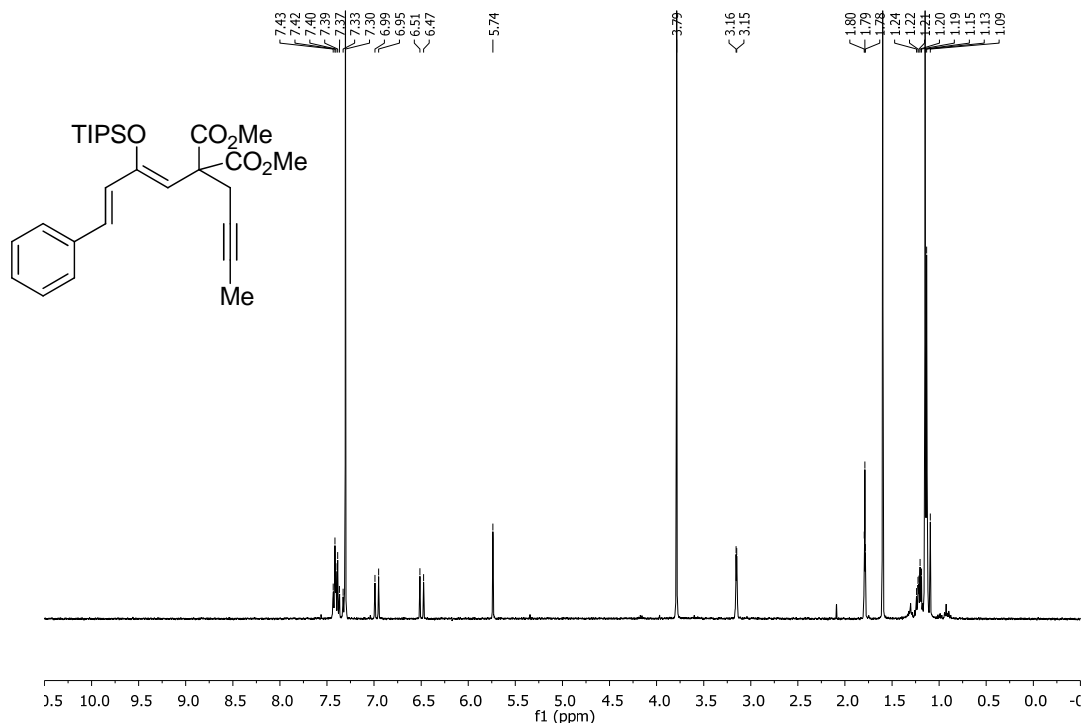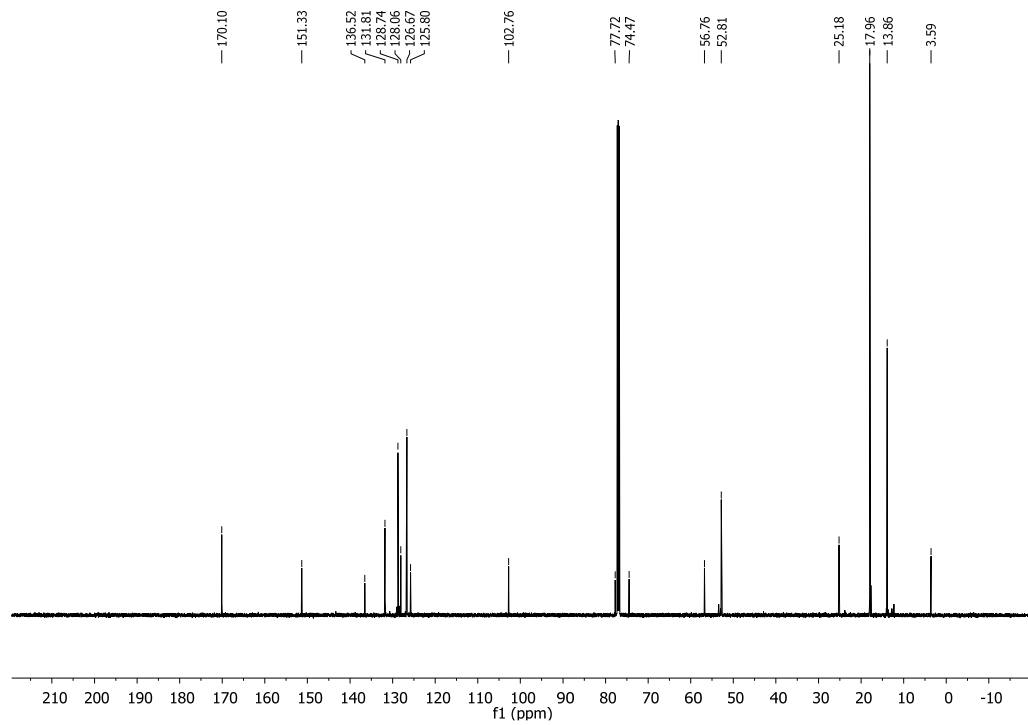

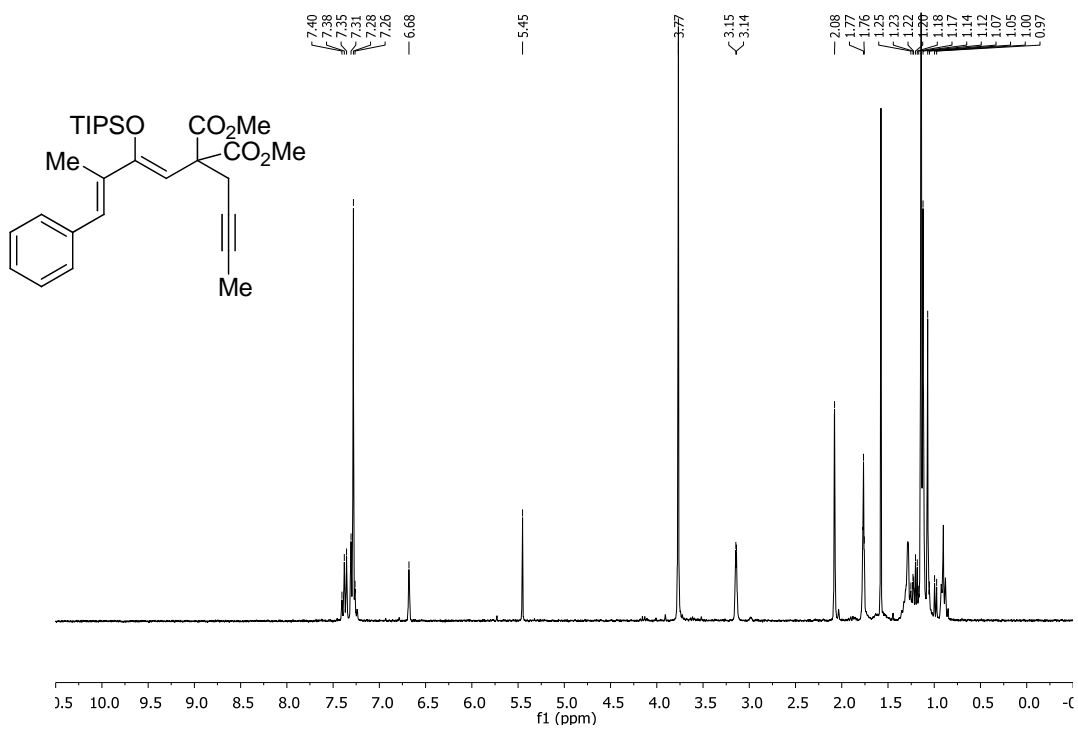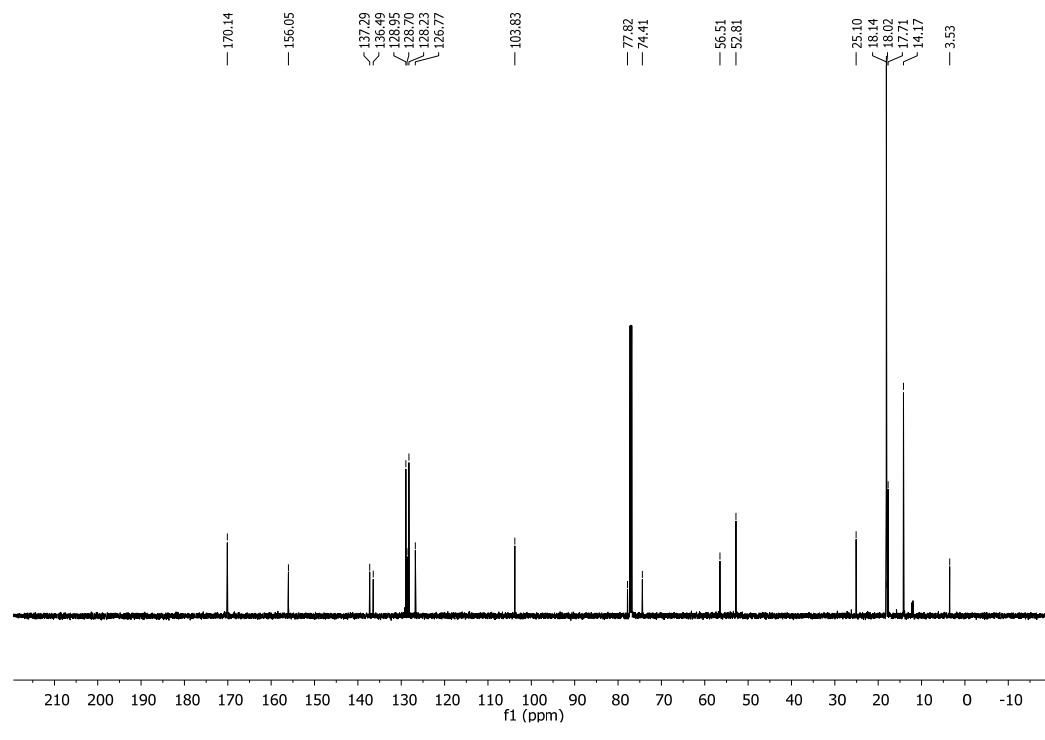

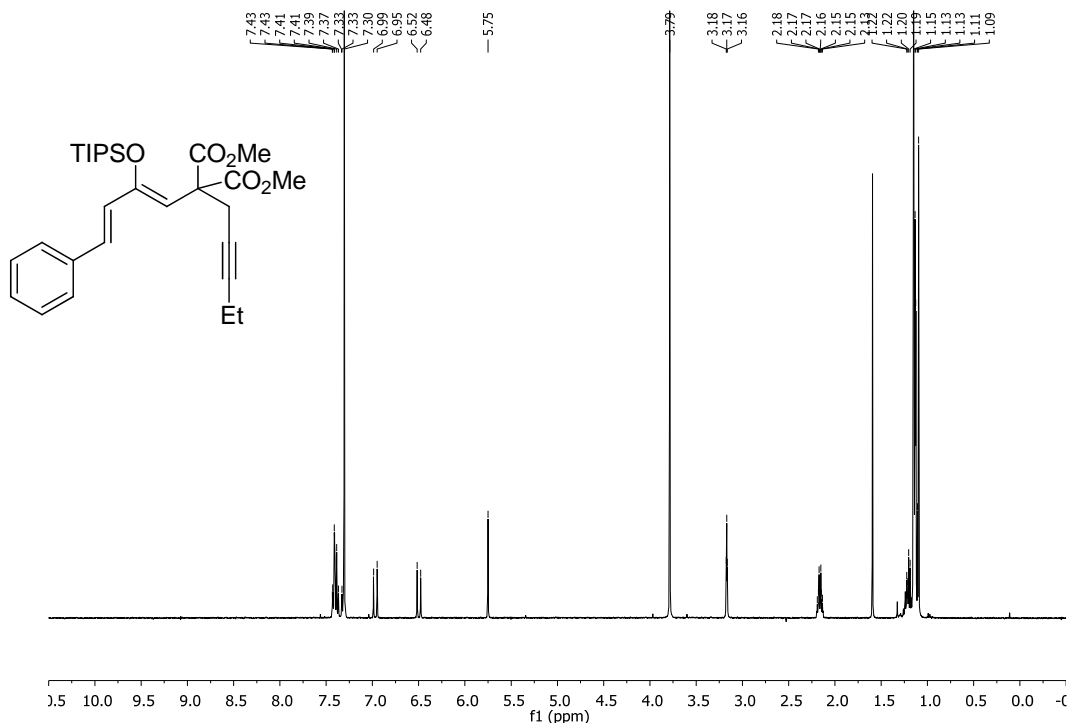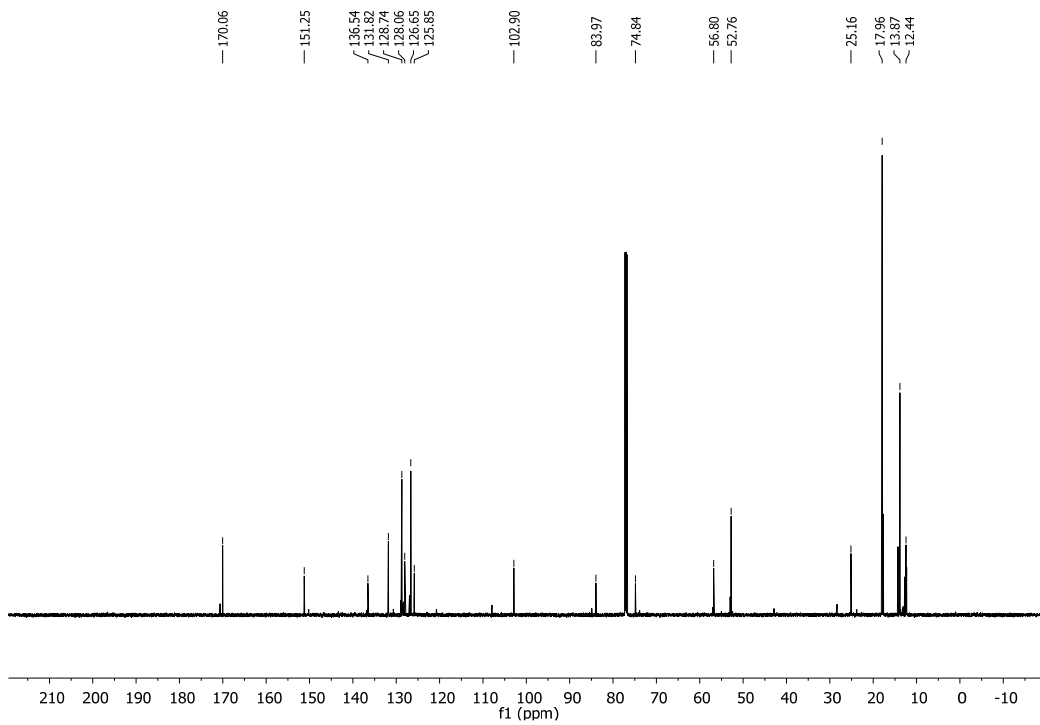



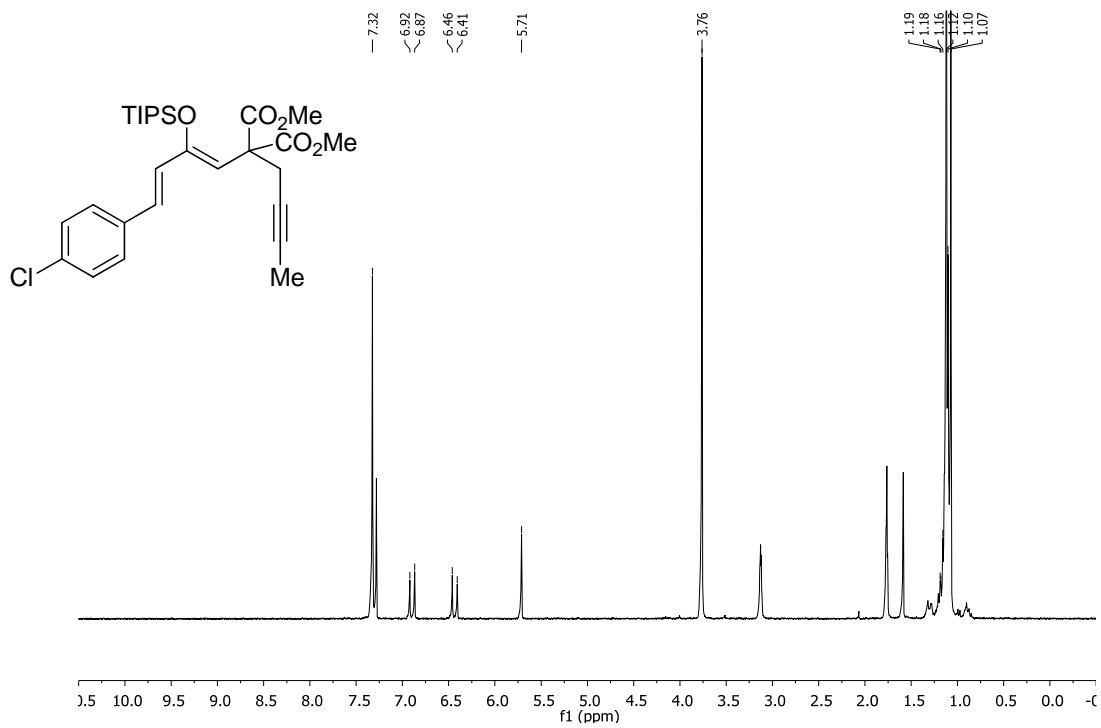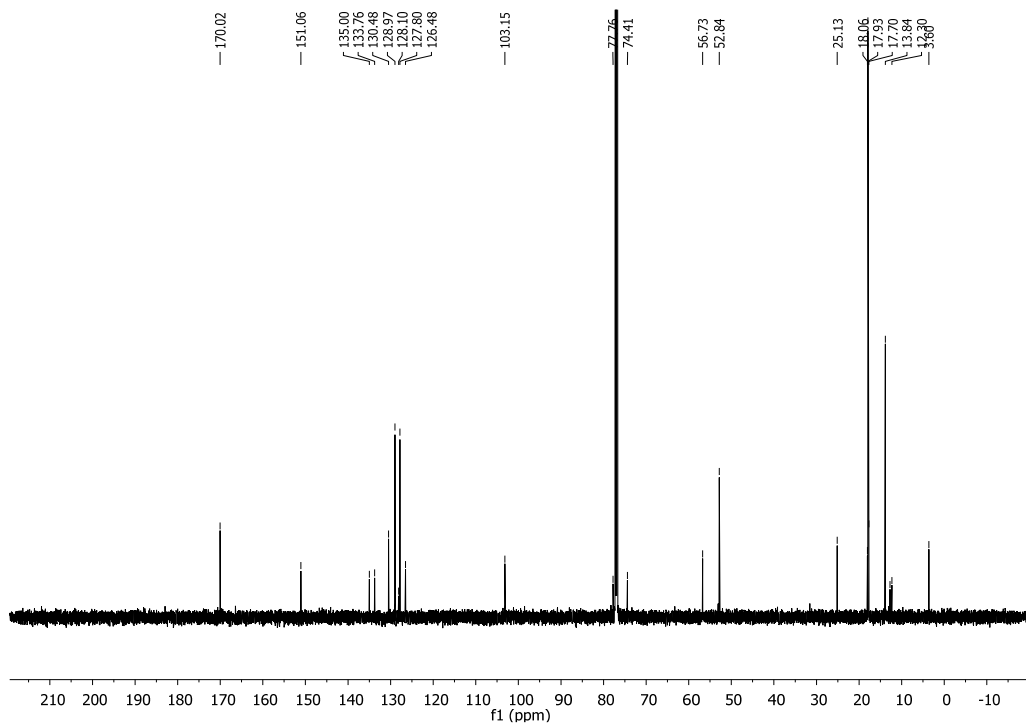

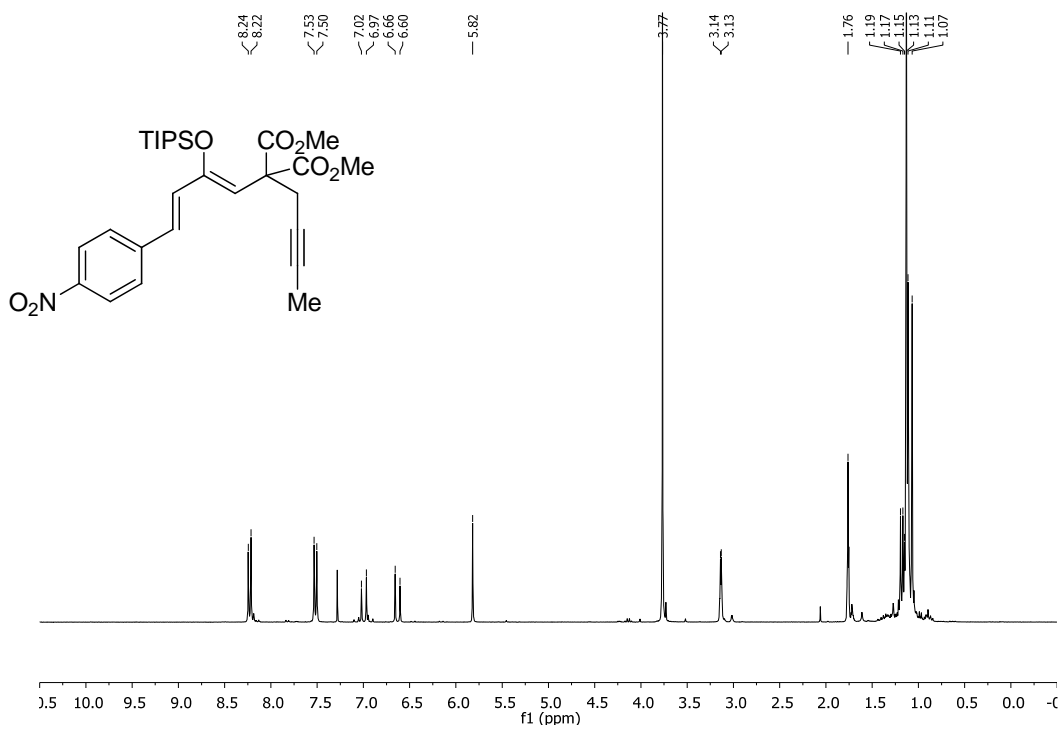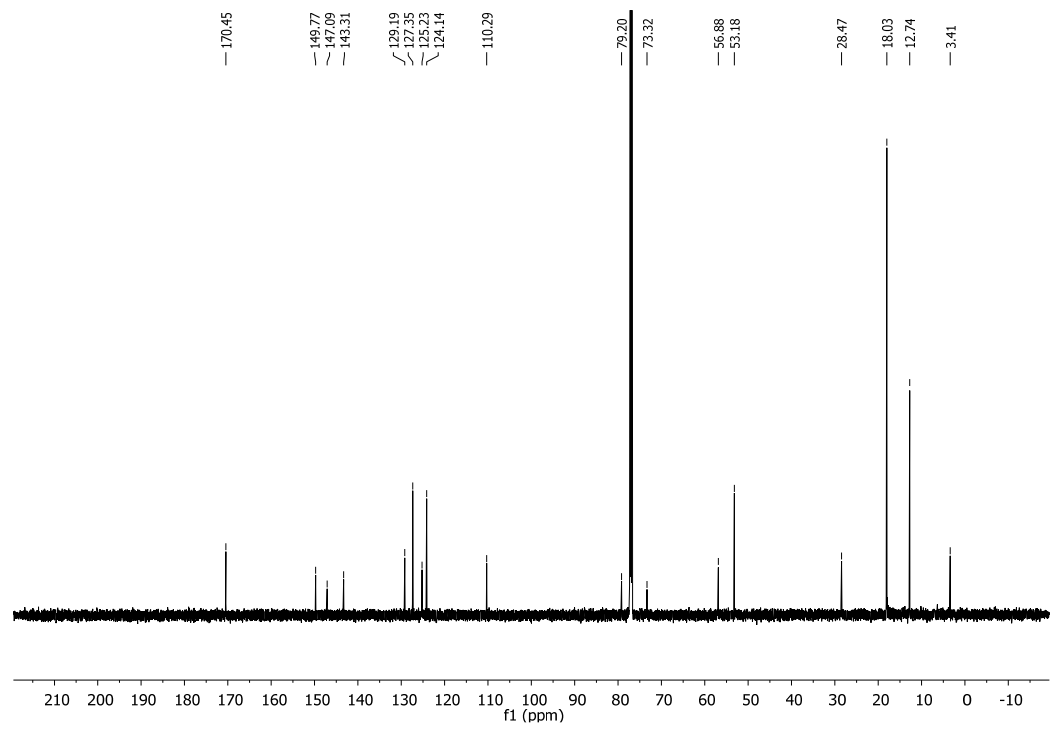

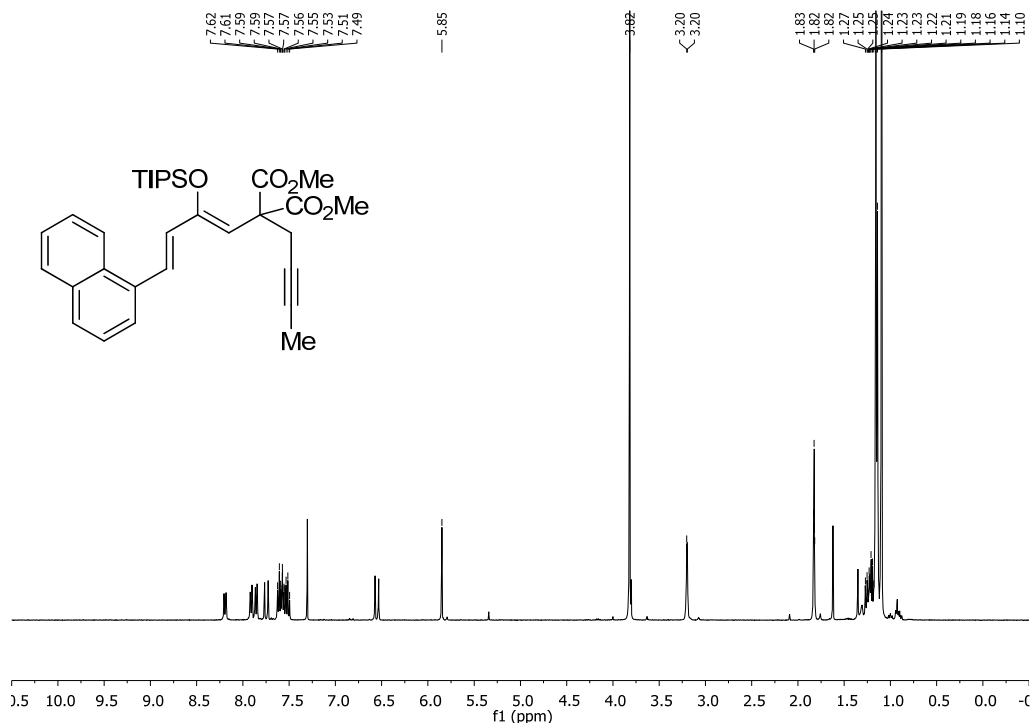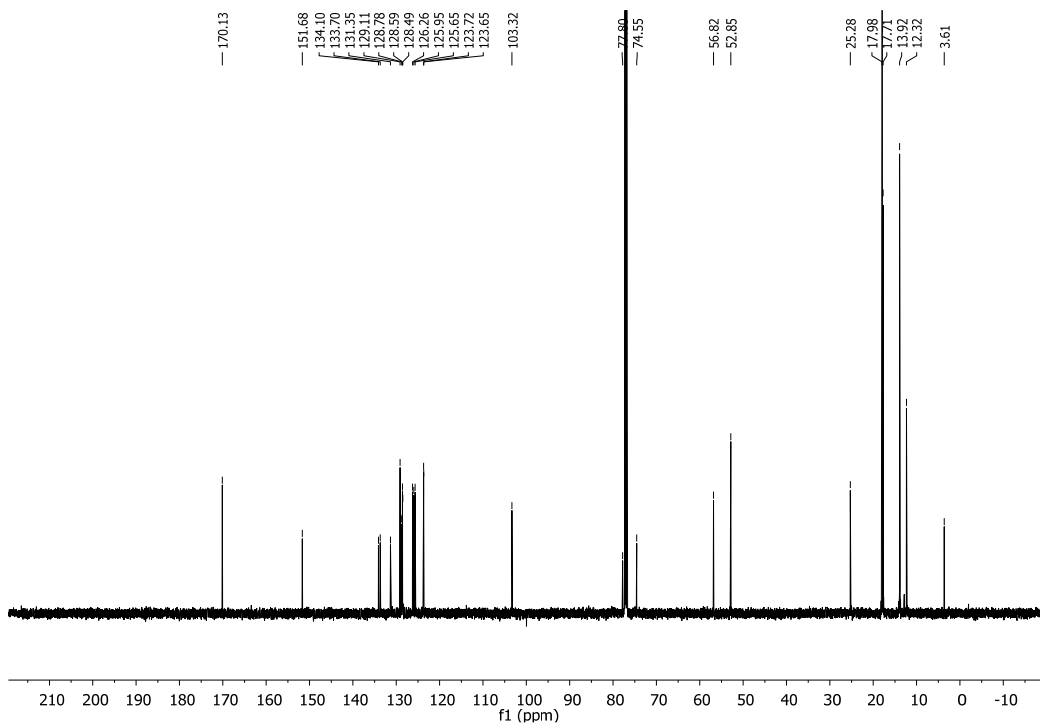

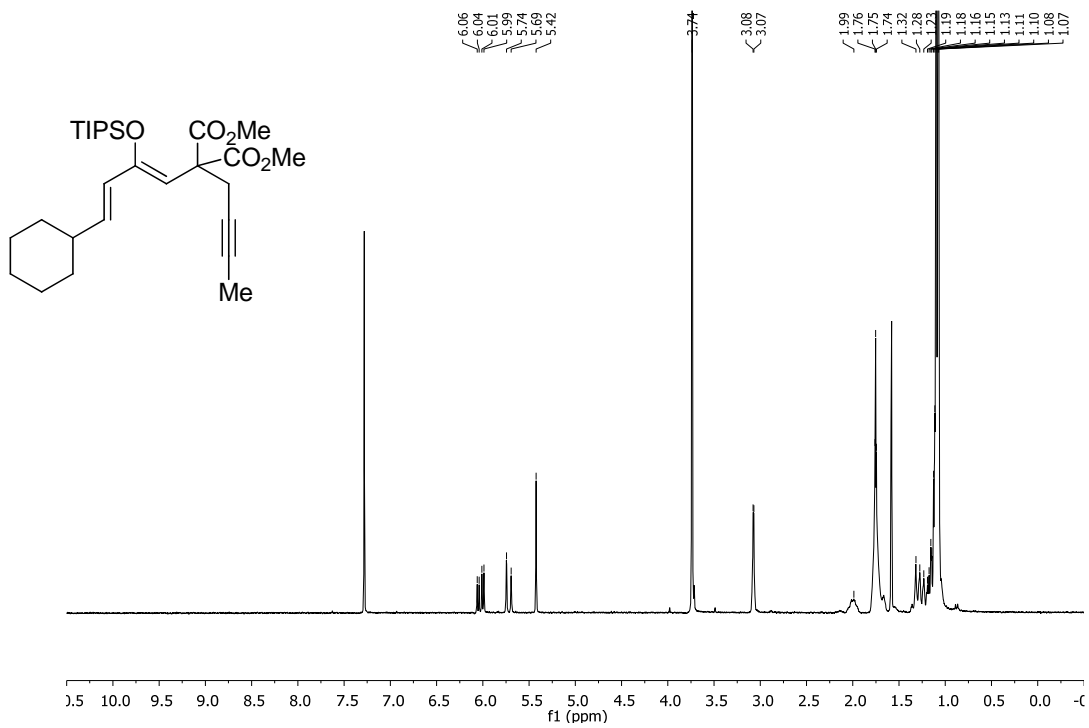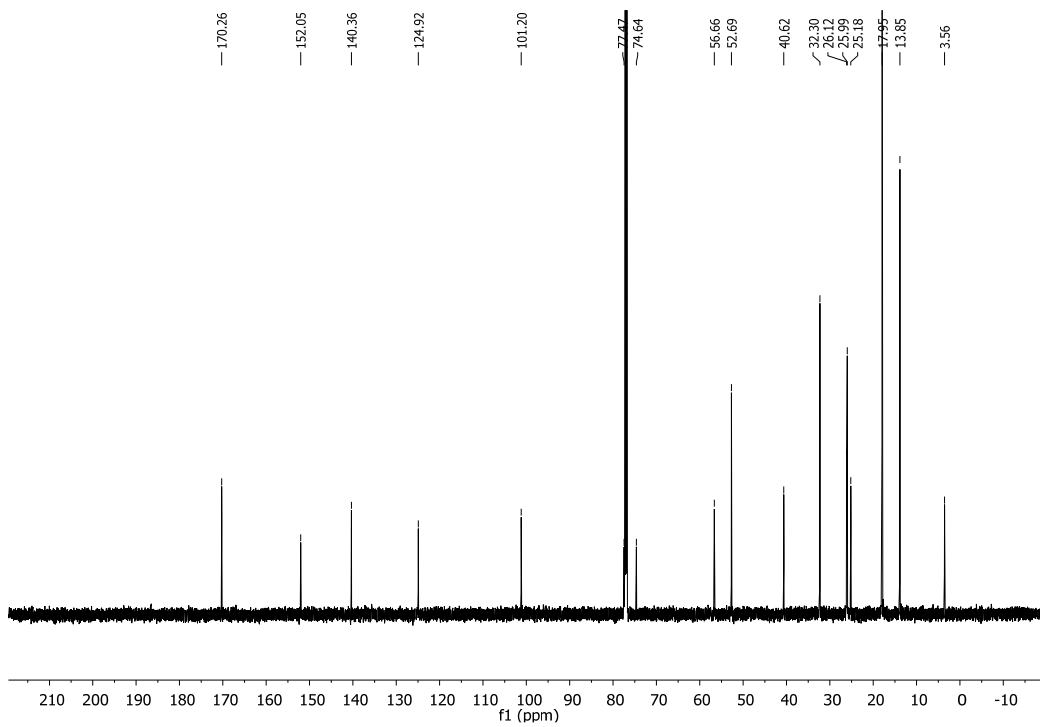

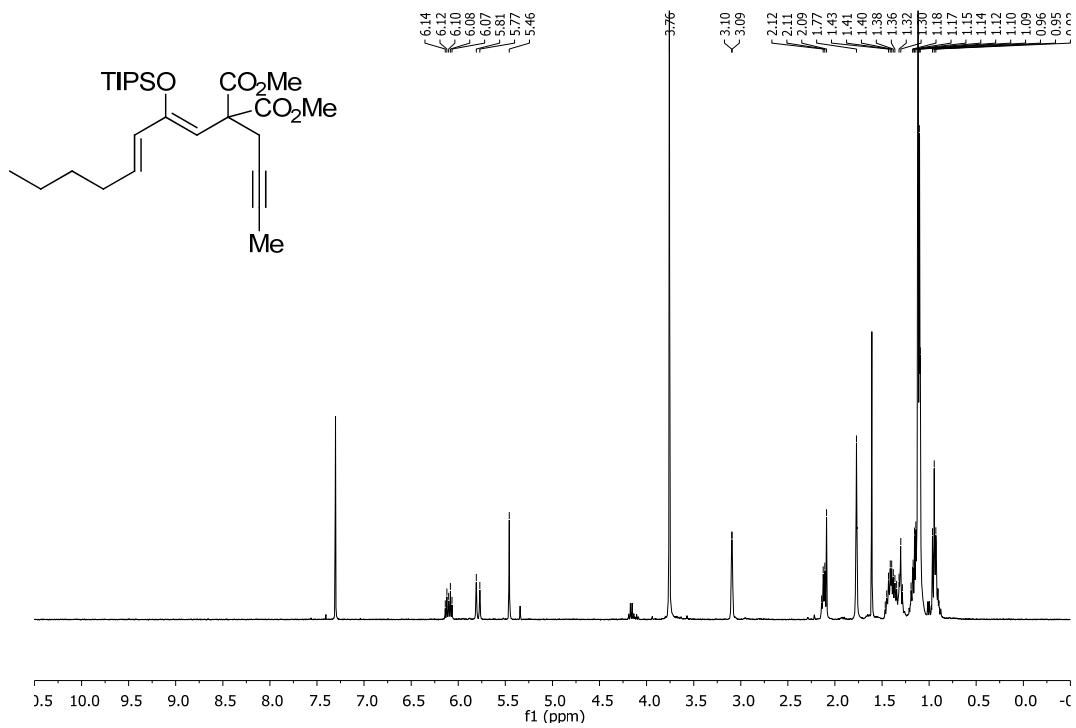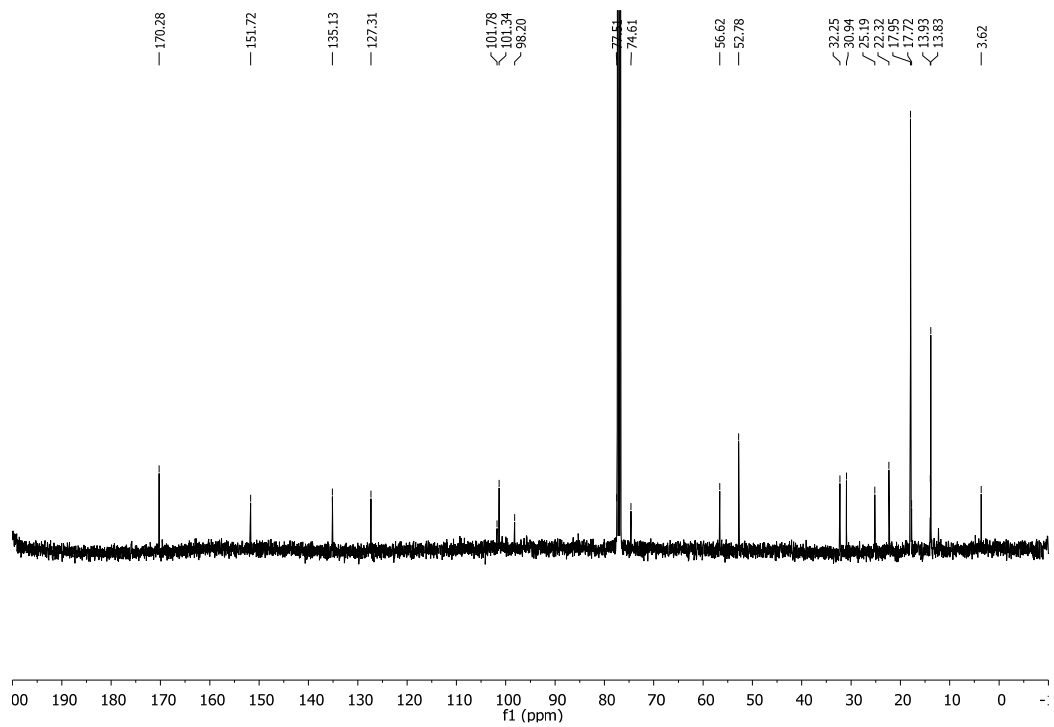

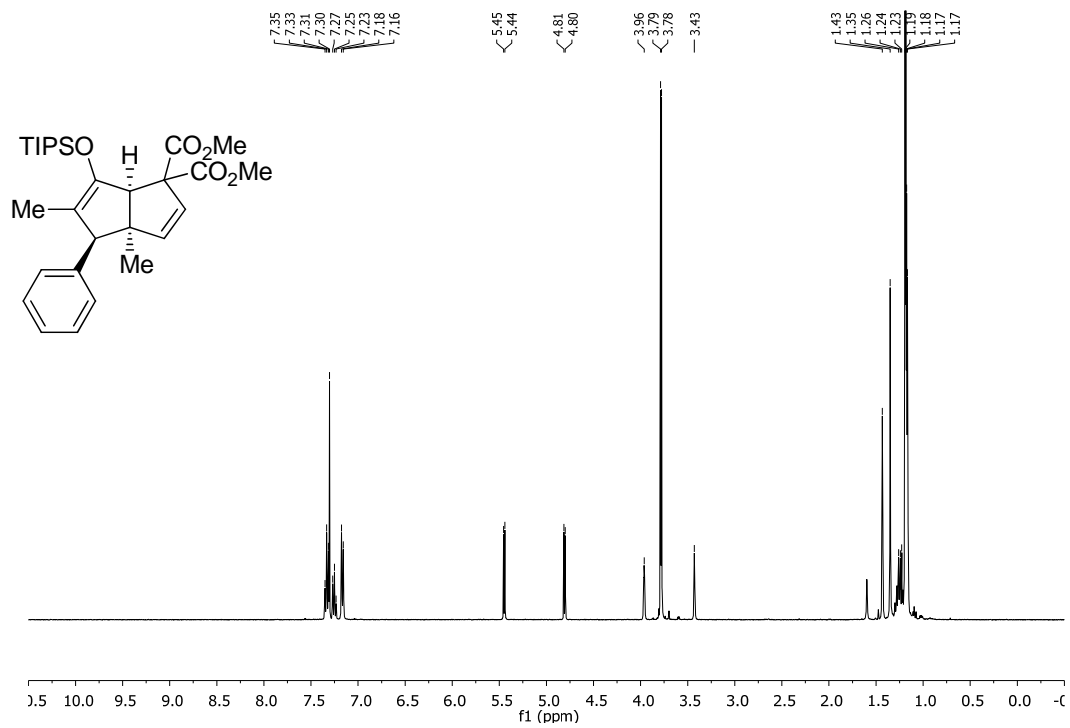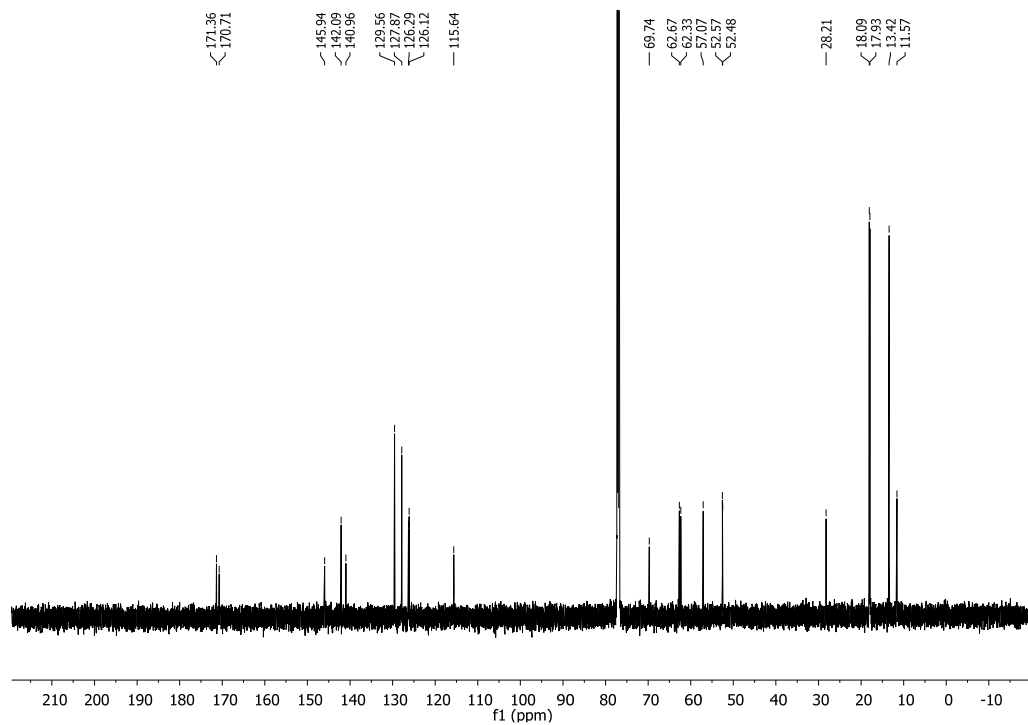

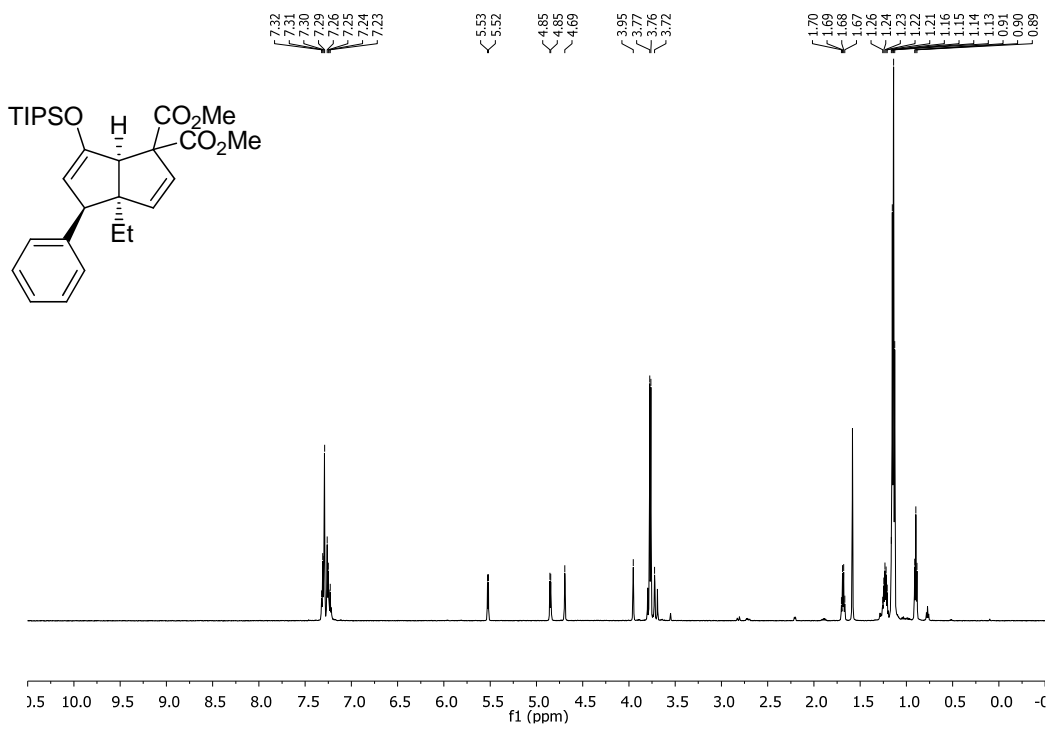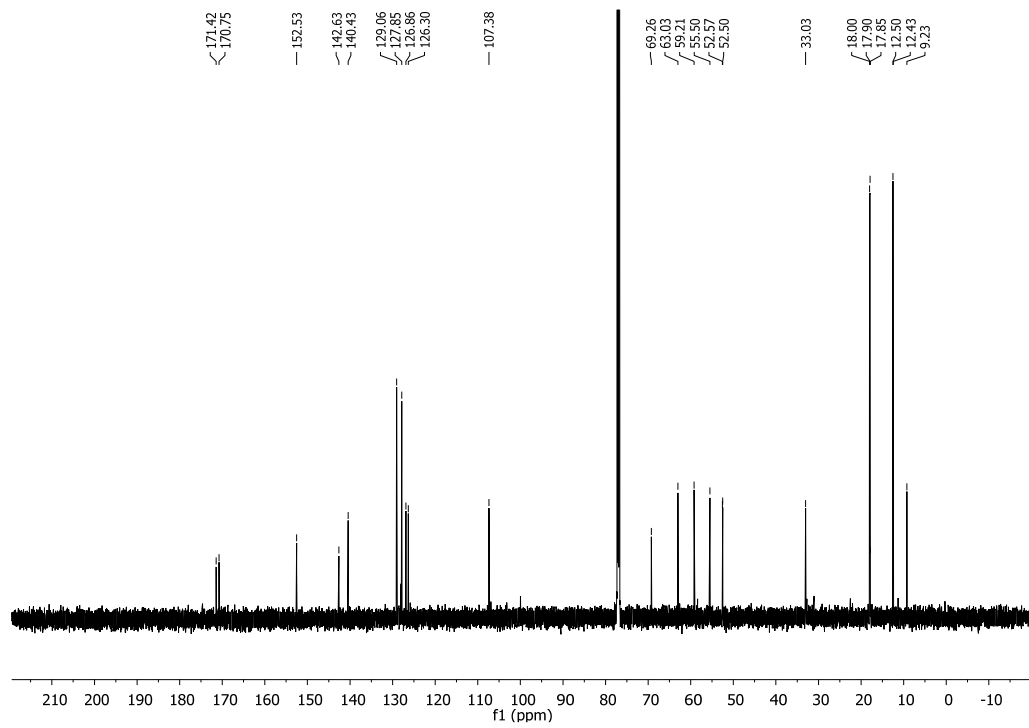





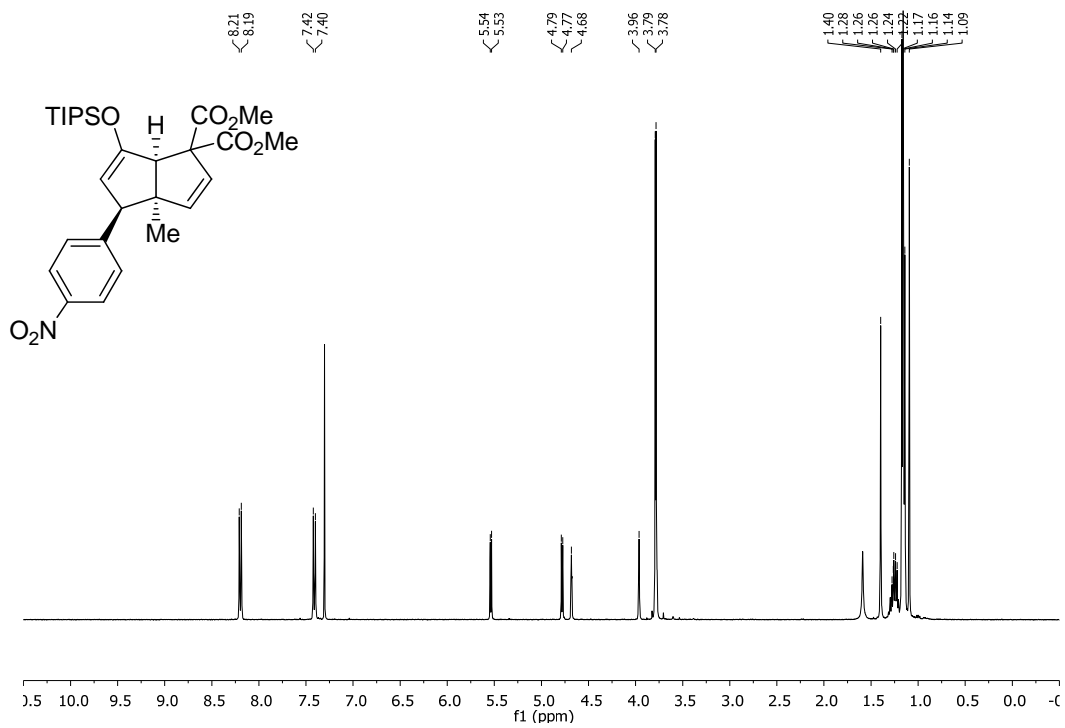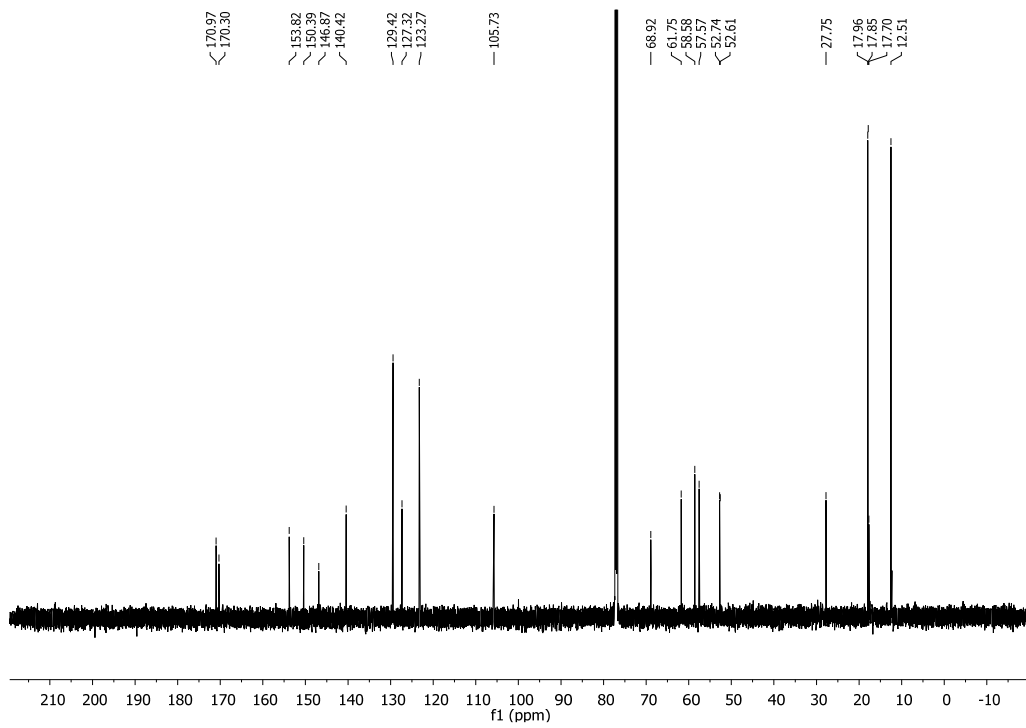

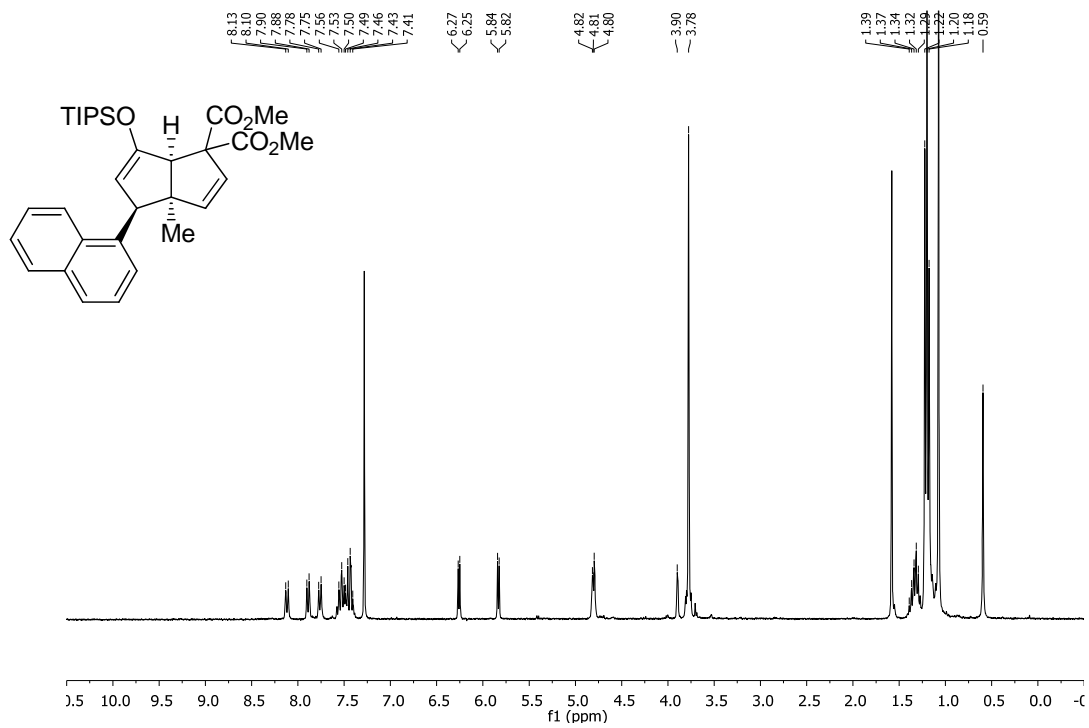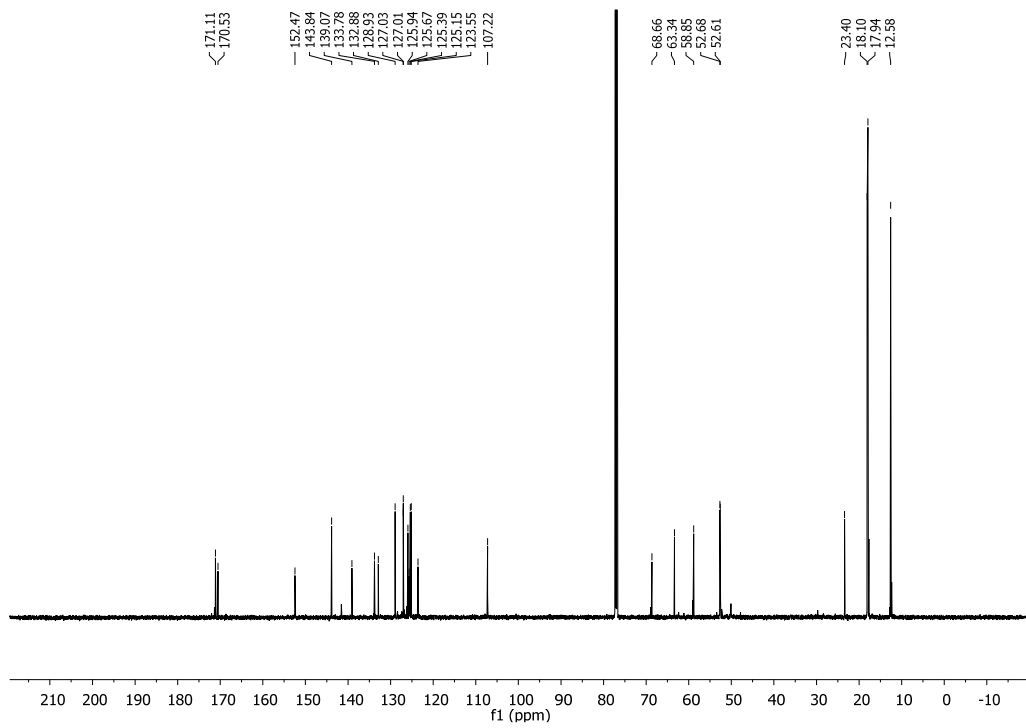



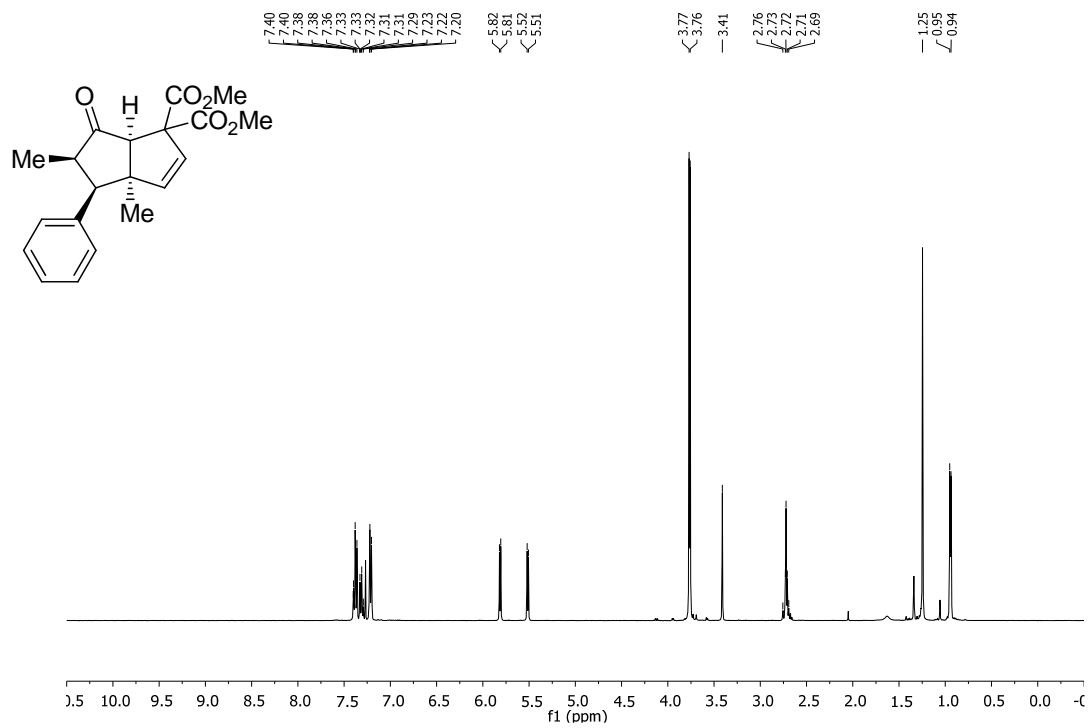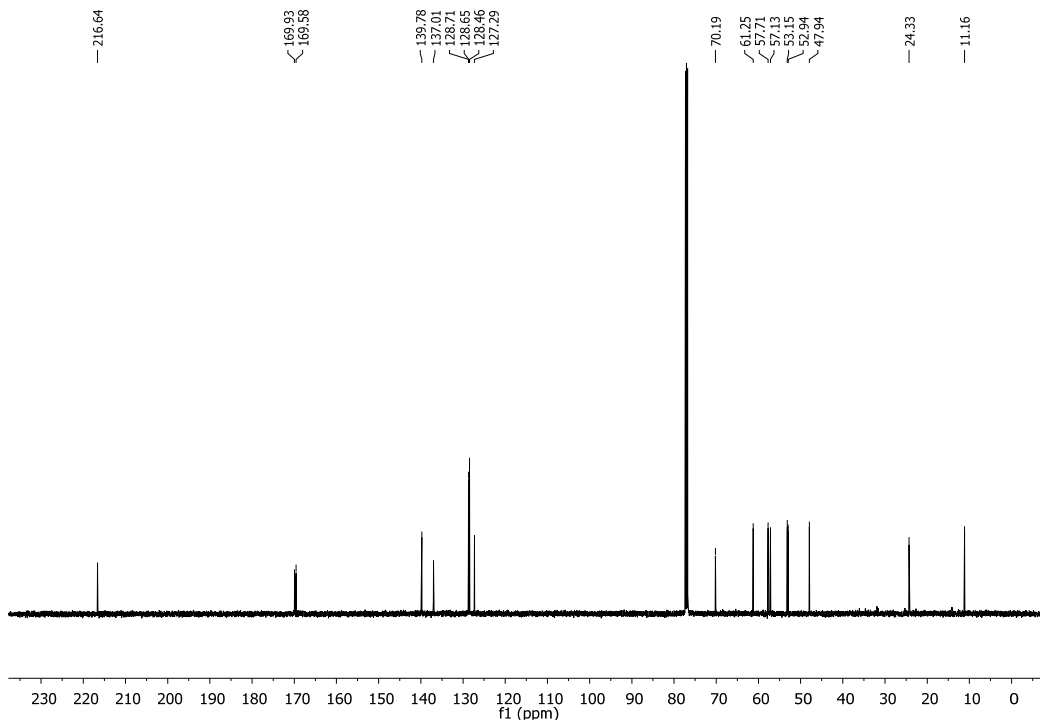

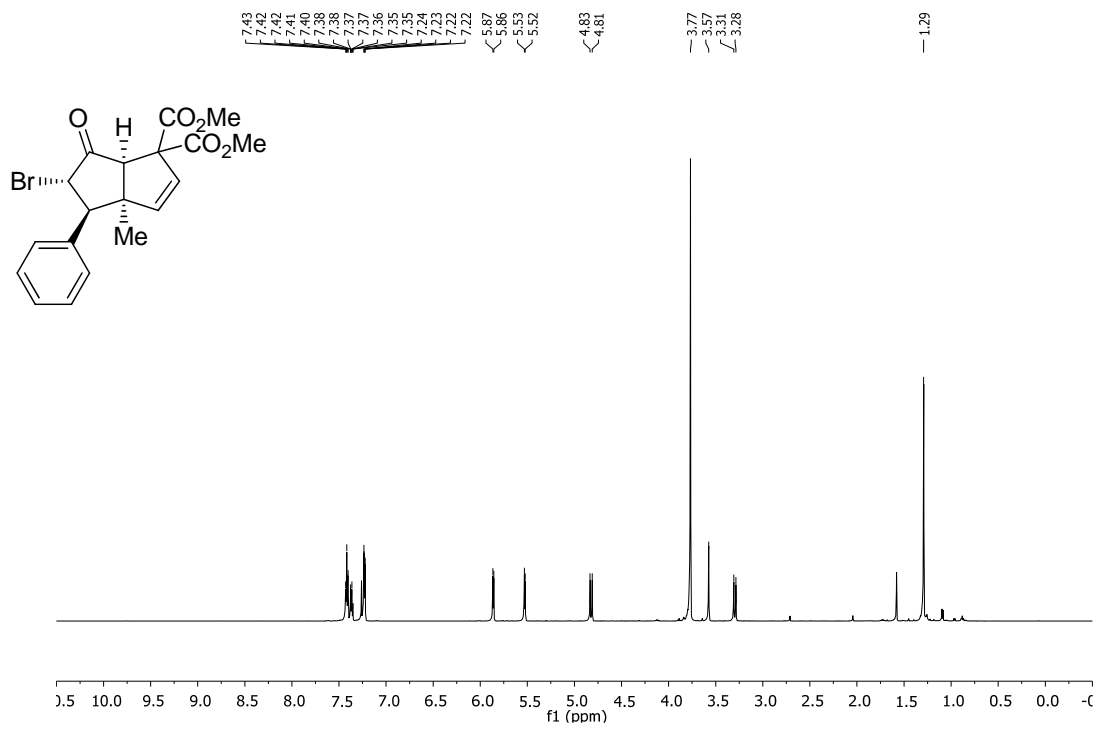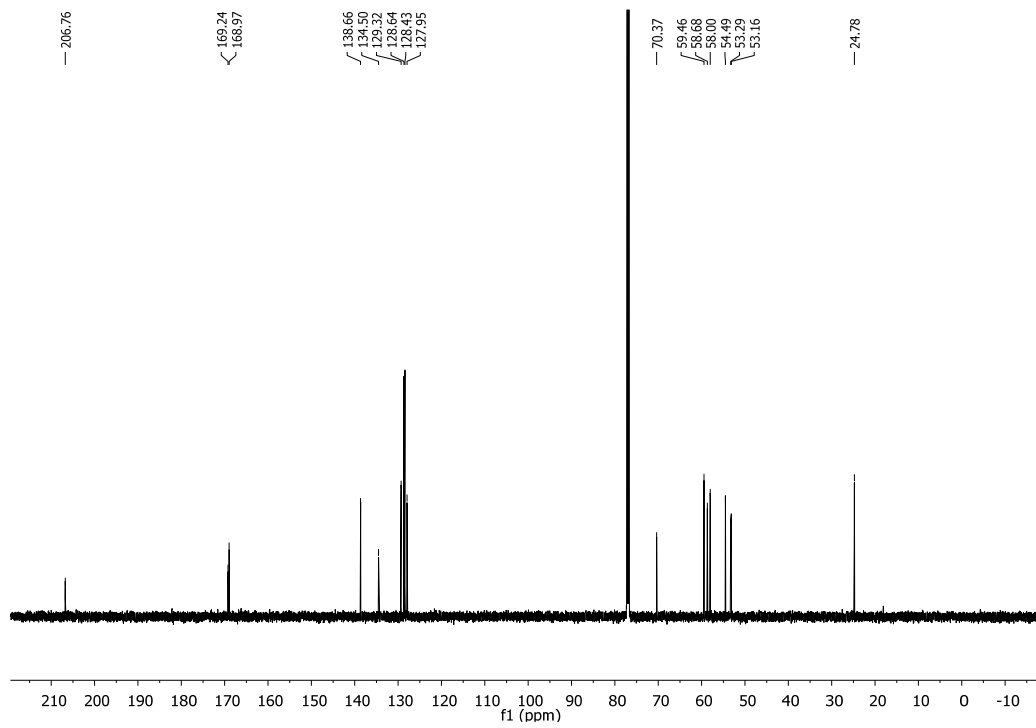

Supplement: NIHMS354210-supplement-2_si_002.pdf [file NIHMS354210-supplement-2_si_002.pdf]
