# Supplementary material
Source: PubMed Central journal article supplement (PMC3279184)
Supplement: NIHMS354210-supplement-1_si_001.pdf [file NIHMS354210-supplement-1_si_001.pdf]

# Enantioselective Cyclizations of Silyloxyenynes Catalyzed by Cationic Metal Phosphine Complexes

Jean-François Brazeau, Suyan Zhang, Ignacio Colomer, Britton K. Corkey, F. Dean Toste\*

*Department of Chemistry, University of California, Berkeley, California 94720*

## Supporting Information (Part A)

### Table of Contents:

|              |                                                                    |             |
|--------------|--------------------------------------------------------------------|-------------|
| <b>I.</b>    | <b>General Information</b>                                         | <b>S-1</b>  |
| <b>II.</b>   | <b>Palladium-catalyzed cyclizations</b>                            | <b>S-3</b>  |
| <b>III.</b>  | <b>Synthesis of Silyloxy-1,6-enynes</b>                            | <b>S-3</b>  |
| <b>IV.</b>   | <b>Gold(I)-catalyzed cyclizations with Silyloxy-1,6-enynes</b>     | <b>S-11</b> |
| <b>V.</b>    | <b>Synthesis of Silyloxy-1,5-enynes</b>                            | <b>S-15</b> |
| <b>VI.</b>   | <b>Gold(I)-catalyzed cyclizations with Silyloxy-1,5-enynes</b>     | <b>S-26</b> |
| <b>VII.</b>  | <b>Synthesis of Silyloxy-1,3-dien-7-yne</b>                        | <b>S-32</b> |
| <b>VIII.</b> | <b>Gold(I)-catalyzed cyclizations with Silyloxy-1,3-dien-7-yne</b> | <b>S-41</b> |
| <b>IX.</b>   | <b>Synthesis of 76, 77 and 78</b>                                  | <b>S-47</b> |
| <b>X.</b>    | <b>Crystallographic data</b>                                       |             |
|              | a) 47                                                              | <b>S-49</b> |
|              | b) 76                                                              | <b>S-51</b> |
| <b>XI.</b>   | <b>HPLC traces</b>                                                 | <b>S-53</b> |

## I. General Information.

Unless otherwise noted, all reagents were obtained commercially and used without further purification. Sodium tetrakis[3,5-bis(trifluoromethyl)phenyl]borate (NaBARF) was ordered from Strem Chemicals. Tetrahydrofuran (THF), diethyl ether (Et<sub>2</sub>O), and dichloromethane (CH<sub>2</sub>Cl<sub>2</sub>) were dried by passing commercially available predried, oxygen-free formulations through activated alumina columns.<sup>1</sup> Triethylamine (Et<sub>3</sub>N) was distilled from CaH<sub>2</sub>. Unless otherwise noted, all reaction mixtures were stirred with a magnetic stir bar in flame-dried glassware under a positive pressure of dry nitrogen. The gold(I)-catalyzed reactions were performed in screw-cap vials under air without exclusion of moisture. Racemic samples were obtained using DTBM-SEGPHOS(AuCl)<sub>2</sub> and NaBARF as catalyst. Chiral gold(I) catalysts were prepared according to a procedure previously described by our group.<sup>2,3</sup>

**Chromatography.** Analytical thin layer chromatography (TLC) was performed on Merck precoated glass-backed TLC plates (silica gel 60 F<sub>254</sub>) and visualized by UV lamp (254 nm) and potassium permanganate (KMnO<sub>4</sub>) stain. Chromatography on silica gel was carried out using ICN SiliTech 32-63 D 60 Å silica gel. Technical grade solvents were employed, which were distilled prior to use. Concentration under reduced pressure was performed by rotary evaporation at 40 °C at the appropriate pressure. Purified compounds were further dried under high vacuum (0.3 Torr). Yields refer to chromatographically purified and spectroscopically pure compounds, unless stated otherwise.

**Nuclear magnetic resonance spectra.** <sup>1</sup>H and <sup>13</sup>C spectra were recorded on a Bruker AV-300, AVQ-400, AVB-400 or AV-600 spectrometer. Chemical shifts (δ) are reported in ppm. <sup>1</sup>H NMR spectra were referenced to CDCl<sub>3</sub> (7.26 ppm) and <sup>13</sup>C NMR spectra were referenced to CDCl<sub>3</sub> (77.0 ppm). All <sup>13</sup>C spectra were measured with complete proton decoupling. Peak multiplicities are designated by the following abbreviations: s, singlet; d, doublet; t, triplet; m, multiplet; br, broad; and *J*, coupling constant in Hz.

---

<sup>1</sup> Alaimo, P. J.; Peters, D. W.; Arnold, J.; Bergman, R. G. *J. Chem. Ed.* **2001**, 78, 64.

<sup>2</sup> Johansson, M. J.; Gorin, D. J.; Stabe, S. T.; Toste, F. D. *J. Am. Chem. Soc.* **2005**, 127, 18002.

<sup>3</sup> Melhado, A. D.; Luparia, M.; Toste, F. D. *J. Am. Chem. Soc.* **2007**, 129, 12638.

**HPLC analyses:** Chiral high performance liquid chromatography (HPLC) was performed on Shimadzu VP and Shimadzu prominence series instruments using 4.6 x 25 cm Daicel Chiralcel OD-H and Chiralpak IB columns.

**Mass spectroscopy.** Mass spectral data were obtained via the Micro-Mass/Analytical Facility operated by the College of Chemistry, University of California, Berkeley.

## II. Palladium-catalyzed cyclizations

For more details on procedure and analytical data for compounds **1–21**, see reference Corkey, B. K.; Toste, F. D. *J. Am. Chem. Soc.* **2007**, *129*, 2764.

**General Procedure for Palladium-catalyzed cyclizations of Silyloxy-1,6-enynes:** A solution of substrate (0.02 mmol), acetic acid (2 drops, 10  $\mu$ L) and (R)-DTBMSegphosPd(OTf)<sub>2</sub> (10 mol%) or BinaphanePd(OTf)<sub>2</sub> in diethyl ether (1 mL) was stirred until the reaction was complete as determined by TLC. The solvent was removed and the residue was purified on silica gel to give the desired products.

## III. Synthesis of Silyloxy-1,6-enynes

### a) Synthesis of Silyloxy-1,6-enynes **22, 24-28**

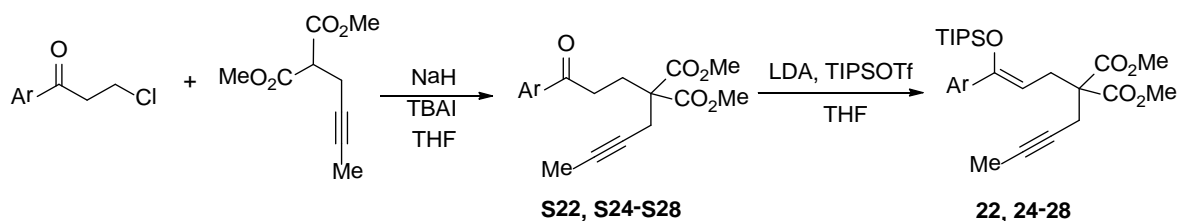

**General Procedure A - Preparation of Aryl ketones:** The alkyne (1.0 equiv.) was dissolved in THF (0.4 M) and cooled to 0 °C. Then, NaH (60 % in oil, 1.1 equiv.) was added in one portion. The reaction mixture was stirred for 30 min. at this temperature. The corresponding 3-chloroketone (1.0 equiv.) was dissolved in THF (0.5 M) and transferred slowly to the reaction mixture. Tetrabutylammonium iodide (TBAI, 0.1 equiv.) was added in one portion. The reaction was warmed to room temperature and then stirred at reflux for 5 h. The reaction mixture was quenched by the addition of an equal volume of sat. aq. NH<sub>4</sub>Cl. The mixture was extracted with Et<sub>2</sub>O (3 ×), and the combined organic layers were washed with brine, dried over MgSO<sub>4</sub>, filtered, and concentrated *in vacuo*. The residue was purified by flash column chromatography to provide analytically pure compound.

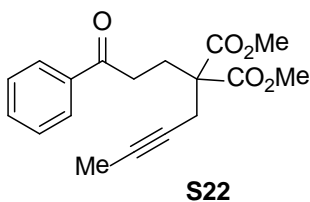

**Dimethyl-2-(but-2-yn-1-yl)-2-(3-oxo-3-phenylpropyl)malonate (S22):** According to the general procedure A, the corresponding 3-chloro-ketone (342 mg, 2.0 mmol) was reacted under the standard conditions. The product was purified by flash column chromatography on silica gel (15% EtOAc in hexanes) to give **S22** (462 mg, 71%) as a white powder:  $^1\text{H NMR}$  (500 MHz,  $\text{CDCl}_3$ )  $\delta$  7.99 (d,  $J = 7.7$  Hz, 2H), 7.63 – 7.53 (m, 1H), 7.49 (t,  $J = 7.6$  Hz, 2H), 3.76 (s, 6H), 3.16 – 2.94 (m, 2H), 2.95 – 2.77 (d,  $J = 2.7$  Hz, 2H), 2.60 – 2.38 (m, 2H), 1.77 (s, 3H);  $^{13}\text{C NMR}$  (126 MHz,  $\text{CDCl}_3$ )  $\delta$  198.8, 170.80 136.7, 133.1, 128.6, 128.1, 79.4, 73.1, 56.6, 52.8, 33.8, 27.1, 24.3, 3.5; **HRMS** (ESI) calc for  $[\text{C}_{18}\text{H}_{21}\text{O}_5]^+$  ( $[\text{M}+\text{H}]^+$ ):  $m/z$  317.1384, found 317.1388.

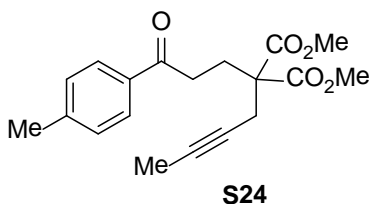

**Dimethyl-2-(but-2-yn-1-yl)-2-(3-oxo-3-(p-tolyl)propyl)malonate (S24):** According to the general procedure A, the corresponding 3-chloro-ketone (547 mg, 3.0 mmol) was reacted under the standard conditions. The product was purified by flash column chromatography on silica gel (15% EtOAc in hexanes) to give **S24** (721 mg, 74%) as a viscous oil:  $^1\text{H NMR}$  (600 MHz,  $\text{CDCl}_3$ )  $\delta$  7.94 (d,  $J = 7.9$  Hz, 2H), 7.26 (d,  $J = 7.8$  Hz, 2H), 3.75 (s, 6H), 3.02 (dd,  $J = 8.8, 7.1$  Hz, 2H), 2.84 (s, 2H), 2.57 – 2.44 (m, 2H), 2.41 (s, 3H), 1.73 (s, 3H);  $^{13}\text{C NMR}$  (126 MHz,  $\text{CDCl}_3$ )  $\delta$  198.5, 170.8, 143.9, 134.2, 129.3, 128.2, 79.3, 73.1, 56.6, 52.8, 33.6, 27.2, 24.2, 21.6, 3.5; **HRMS** (ESI) calc for  $[\text{C}_{19}\text{H}_{23}\text{O}_5]^+$  ( $[\text{M}+\text{H}]^+$ ):  $m/z$  331.1540, found 331.1544.

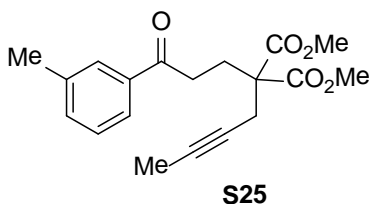

**Dimethyl-2-(but-2-ynyl)-2-(3-oxo-3-(m-tolyl)propyl)malonate (S25):** According to the general procedure A, the corresponding 3-chloro-ketone (366 mg, 2.0 mmol) was reacted under the standard conditions. The product was purified by flash column chromatography on silica gel (15% EtOAc in hexanes) to give **S25** (401 mg, 59%) as an off-white solid:  $^1\text{H NMR}$  (600 MHz,  $\text{CDCl}_3$ )  $\delta$  7.77 (s, 1H), 7.45 – 7.26 (m, 3H), 3.74 (s, 6H), 3.08 – 2.91 (m, 2H), 2.85 (d,  $J = 2.6$  Hz, 1H), 2.54 – 2.44 (m, 1H), 2.41 (s, 2H), 1.74 (s, 3H);  $^{13}\text{C NMR}$  (151 MHz,  $\text{CDCl}_3$ )  $\delta$  198.9, 170.7, 138.3, 136.6, 133.8, 128.5, 128.4, 125.3, 79.3, 73.0, 56.5, 52.7, 33.71, 27.0, 24.1, 21.3, 3.45; **HRMS** (ESI) calc for  $[\text{C}_{19}\text{H}_{22}\text{O}_5\text{Na}]^+$  ( $[\text{M}+\text{Na}]^+$ ):  $m/z$  353.1359, found: 353.1361.

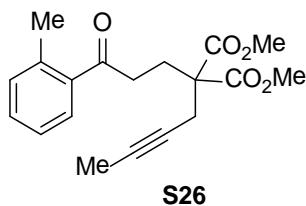

**Dimethyl 2-(but-2-ynyl)-2-(3-oxo-3-(4-methoxyphenyl)propyl)malonate (S27):** According to the general procedure A, the corresponding 3-chloro-ketone (366 mg, 2.0 mmol) was reacted under the standard conditions. The product was purified twice by flash column chromatography on silica gel (15% EtOAc in hexanes) to give **S27** (318 mg, 48%) as a viscous oil:  $^1\text{H NMR}$  (600 MHz,  $\text{CDCl}_3$ )  $\delta$  7.66 (d,  $J = 7.6$  Hz, 1H), 7.37 (d,  $J = 7.4$  Hz, 1H), 7.27 – 7.23 (m, 2H), 3.74 (s, 6H), 2.95 (t,  $J = 7.8$  Hz, 2H), 2.82 (q,  $J = 2.4$  Hz, 2H), 2.50 (s, 3H), 2.48 – 2.43 (m, 2H), 1.79 – 1.70 (t,  $J = 2.6$  Hz, 3H);  $^{13}\text{C NMR}$  (151 MHz,  $\text{CDCl}_3$ )  $\delta$  202.6, 170.7, 138.2, 137.4, 131.9, 131.3, 128.5, 125.6, 79.2, 73.0, 56.5, 52.7, 36.4, 27.1, 24.1, 21.3, 3.4; **HRMS** (ESI) calc for  $[\text{C}_{19}\text{H}_{22}\text{O}_5\text{Na}]^+$  ( $[\text{M}+\text{Na}]^+$ ):  $m/z$  353.1359, found: 353.1363.

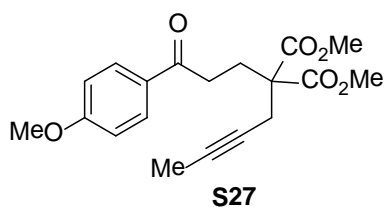

**Dimethyl-2-(but-2-yn-1-yl)-2-(3-(4-methoxyphenyl)-3-oxopropyl)malonate (S27):**

According to the general procedure A, the corresponding 3-chloro ketone (393 mg, 2.0 mmol) was reacted under the standard conditions. The product was purified by flash column chromatography on silica gel (20% EtOAc in hexanes) to give **S27** (541 mg, 78%) as an off-white solid:  $^1\text{H NMR}$  (500 MHz,  $\text{CDCl}_3$ )  $\delta$  7.99 (d,  $J = 8.6$  Hz, 2H), 6.96 (d,  $J = 8.8$  Hz, 2H), 3.90 (s, 3H), 3.77 (s, 6H), 3.03 – 2.95 (m, 1H), 2.87 (s, 2H), 2.55 – 2.44 (m, 2H), 1.77 (s, 3H);  $^{13}\text{C NMR}$  (126 MHz,  $\text{CDCl}_3$ )  $\delta$  197.4, 170.8, 163.5, 130.4, 129.8, 113.7, 79.3, 73.1, 56.6, 55.5, 52.8, 33.4, 27.3, 24.2, 3.6; **HRMS** (ESI) calc for  $[\text{C}_{19}\text{H}_{23}\text{O}_6]^+$  ( $[\text{M}+\text{H}]^+$ ):  $m/z$  347.1489, found: 347.1493.

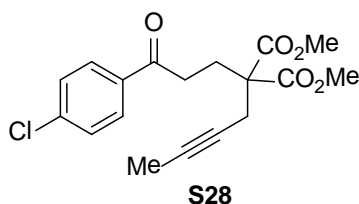

**Dimethyl-2-(but-2-yn-1-yl)-2-(3-(4-chlorophenyl)-3-oxopropyl)malonate (S28):** According to the general procedure A, the corresponding 3-chloro ketone (330 mg, 1.6 mmol) was reacted under the standard conditions. The product was purified by flash column chromatography on silica gel (15% EtOAc in hexanes) to give **S28** (391 mg, 70%) as an off-white solid:  $^1\text{H NMR}$  (500 MHz,  $\text{CDCl}_3$ )  $\delta$  7.89 (d,  $J = 8.7$  Hz, 2H), 7.41 (d,  $J = 8.2$  Hz, 2H), 3.72 (s, 6H), 2.99 (t,  $J = 7.8$  Hz, 2H), 2.81 (d,  $J = 2.5$  Hz, 2H), 2.47 (t,  $J = 7.8$  Hz, 2H), 1.72 (s, 3H);  $^{13}\text{C NMR}$  (126 MHz,  $\text{CDCl}_3$ )  $\delta$  197.6, 170.7, 139.5, 134.9, 129.5, 128.9, 79.4, 73.0, 56.5, 52.8, 33.8, 27.1, 24.3, 3.5; **HRMS** (ESI) calc for  $[\text{C}_{18}\text{H}_{20}\text{O}_5\text{Cl}]^+$  ( $[\text{M}+\text{Na}]^+$ ):  $m/z$  351.0994, found: 351.1000.

**General Procedure B - Preparation of enolsilanes:** A solution of diisopropylamine (1.1 equiv) in THF (0.5 M) was cooled to  $-78$  °C and n-butyllithium (1.6 M solution of in n-hexane, 1.05 equiv.) was added slowly by a syringe. This mixture was stirred for 20 min at  $-78$  °C and a solution (0.5 M) of the corresponding ketone (1.0 equiv) was added. The mixture was stirred for an additional 30 min and TIPSOTf (1.2 equiv) was added. The solution was stirred for 1.5 h at  $-78$  °C and subsequently allowed to warm up to room temperature. The

reaction was quenched by the addition of an equal volume of sat. aq.  $\text{NH}_4\text{Cl}$ . The mixture was extracted with EtOAc (3  $\times$ ), and the combined organic layers were washed with brine, dried over  $\text{MgSO}_4$ , filtered, and concentrated *in vacuo*. The residue was purified by flash column chromatography to provide analytically pure compound.

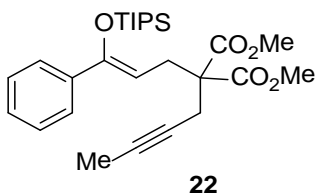

**(Z)-dimethyl 2-(but-2-ynyl)-2-(3-phenyl-3-(triisopropylsilyloxy)allyl)malonate (22):**

According to the general procedure B, ketone **S22** (158 mg, 0.5 mmol) was reacted under the standard conditions. The product was purified by flash column chromatography on silica gel (5% EtOAc in hexanes) to give **22** (180 mg, 76%) as a pale yellow viscous oil:  $^1\text{H NMR}$  (300 MHz,  $\text{CDCl}_3$ )  $\delta$  7.39 (dd,  $J = 7.3, 2.3$  Hz, 2H), 7.32 – 7.15 (m, 3H), 4.76 (t,  $J = 7.1$  Hz, 1H), 3.72 (s, 6H), 2.99 (d,  $J = 7.1$  Hz, 2H), 2.77 (q,  $J = 2.6$  Hz, 2H), 1.74 (t,  $J = 2.5$  Hz, 3H), 1.13 – 0.90 (m, 21H);  $^{13}\text{C NMR}$  (101 MHz,  $\text{CDCl}_3$ )  $\delta$   $^{13}\text{C NMR}$  (126 MHz,  $\text{CDCl}_3$ )  $\delta$  170.9, 153.4, 127.9, 127.8, 126.2, 103.7, 78.6, 73.7, 57.4, 52.6, 29.4, 23.6, 18.0, 13.5, 12.5, 3.6; **HRMS** (ESI) calc for  $[\text{C}_{27}\text{H}_{41}\text{O}_5\text{Si}]^+$  ( $[\text{M}+\text{H}]^+$ ):  $m/z$  473.2718, found 473.2728.

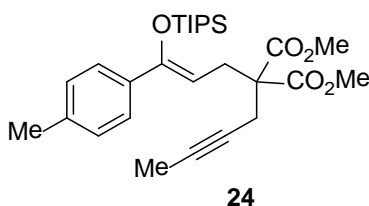

**(Z)-dimethyl 2-(but-2-ynyl)-2-(3-p-tolyl-3-(triisopropylsilyloxy)allyl)malonate (24):**

According to the general procedure B, ketone **S24** (316 mg, 1.0 mmol) was reacted under the standard conditions. The product was purified by flash column chromatography on silica gel (5% EtOAc in hexanes) to give **24** (303 mg, 64%) as a pale yellow viscous oil:  $^1\text{H NMR}$  (400 MHz,  $\text{CDCl}_3$ )  $\delta$  7.29 (d,  $J = 7.7$  Hz, 2H), 7.08 (d,  $J = 7.7$  Hz, 2H), 4.73 (t,  $J = 7.0$  Hz, 2H), 3.73 (s, 6H), 2.99 (d,  $J = 7.0$  Hz, 2H), 2.78 (q,  $J = 2.7$  Hz, 2H), 2.34 (s, 3H), 1.75 (s, 3H), 1.15 – 0.95 (m, 21H);  $^{13}\text{C NMR}$  (151 MHz,  $\text{CDCl}_3$ )  $\delta$  170.8, 153.3, 137.5, 137.1, 128.5, 128.2,



126.1, 102.9, 78.5, 73.7, 57.5, 52.5, 29.4, 23.5, 21.1, 17.9, 17.65, 13.43, 12.5, 3.5; **HRMS** (ESI) calc for  $[\text{C}_{28}\text{H}_{43}\text{O}_5\text{Si}]^+$  ( $[\text{M}+\text{Na}]^+$ ):  $m/z$  487.2874, found 487.2884.

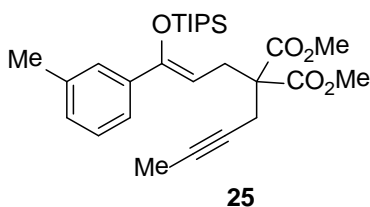

**(Z)-dimethyl 2-(but-2-ynyl)-2-(3-m-tolyl-3-(triisopropylsilyloxy)allyl)malonate (25):**

According to the general procedure B, ketone **S25** (168 mg, 0.5 mmol) was reacted under the standard conditions. The product was purified by flash column chromatography on silica gel (5% EtOAc in hexanes) to give **25** (182 mg, 77%) as a pale yellow viscous oil:  $^1\text{H NMR}$  (600 MHz,  $\text{CDCl}_3$ )  $\delta$  7.31 – 7.11 (m, 3H), 7.06 (d,  $J = 7.4$  Hz, 1H), 4.75 (t,  $J = 7.0$  Hz, 1H), 3.73 (s, 6H), 3.00 (d,  $J = 6.9$  Hz, 2H), 2.78 (q,  $J = 2.5$  Hz, 2H), 2.32 (s, 3H), 1.75 (s, 3H), 1.20 – 0.97 (m, 21H);  $^{13}\text{C NMR}$  (151 MHz,  $\text{CDCl}_3$ )  $\delta$  170.8, 153.4, 139.8, 137.3, 128.4, 127.7, 126.9, 123.4, 103.4, 78.5, 73.7, 57.4, 52.5, 29.4, 23.5, 21.4, 17.8, 13.4, 3.5; **HRMS** (ESI) calc for  $[\text{C}_{28}\text{H}_{43}\text{O}_5\text{Si}]^+$  ( $[\text{M}+\text{Na}]^+$ ):  $m/z$  487.2874, found 487.2882.

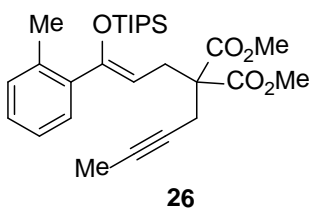

**(Z)-dimethyl 2-(but-2-ynyl)-2-(3-o-tolyl-3-(triisopropylsilyloxy)allyl)malonate (26):**

According to the general procedure B, ketone **S26** (168 mg, 0.5mmol) was reacted under the standard conditions. The product was purified by flash column chromatography on silica gel (5% EtOAc in hexanes) to give **26** (191 mg, 81%) as a pale yellow viscous oil:  $^1\text{H NMR}$  (500 MHz,  $\text{CDCl}_3$ )  $\delta$  7.28 – 7.07 (m, 4H), 4.48 (t,  $J = 7.0$  Hz, 1H), 3.76 (s, 6H), 3.05 (d,  $J = 7.2$  Hz, 2H), 2.80 (s, 2H), 2.37 (s, 3H), 1.78 (s, 3H), 1.16 – 0.95 (m, 21H);  $^{13}\text{C NMR}$  (126 MHz,  $\text{CDCl}_3$ )  $\delta$  171.0, 153.4, 140.3, 136.7, 130.1, 128.9, 128.1, 125.4, 105.2, 78.7, 73.9, 57.5, 52.8, 29.0, 23.5, 20.0, 17.9, 13.3, 3.8; **HRMS** (ESI) calc for  $[\text{C}_{28}\text{H}_{43}\text{O}_5\text{Si}]^+$  ( $[\text{M}+\text{Na}]^+$ ):  $m/z$  487.2874, found 487.2883.

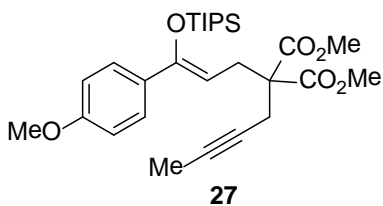

**(Z)-dimethyl-2-(but-2-ynyl)-2-(3-(4-methoxyphenyl)-3-(triisopropylsilyloxy)allyl)malonate (27):** According to the general procedure B, ketone **S27** (200 mg, 0.58 mmol) was reacted under the standard conditions. The product was purified by flash column chromatography on silica gel (5% EtOAc in hexanes) to give **27** (213 mg, 78%) as an off-white solid:  $^1\text{H NMR}$  (400 MHz,  $\text{CDCl}_3$ )  $\delta$  7.33 (d,  $J = 8.8$  Hz, 2H), 6.81 (d,  $J = 8.8$  Hz, 2H), 4.67 (t,  $J = 7.0$  Hz, 1H), 3.81 (s, 3H), 3.73 (s, 6H), 2.98 (d,  $J = 6.9$  Hz, 2H), 2.78 (q,  $J = 2.5$  Hz, 2H), 1.75 (s, 3H), 1.19 – 0.94 (m, 21H);  $^{13}\text{C NMR}$  (151 MHz,  $\text{CDCl}_3$ )  $\delta$  198.6, 171.8, 170.99, 163.6, 138.2, 130.8, 129.4, 120.0, 113.8, 59.4, 55.5, 52.8, 52.7, 46.7, 42.5, 39.1, 15.0; **HRMS** (ESI) calc for  $[\text{C}_{28}\text{H}_{43}\text{O}_6\text{Si}]^+$  ( $[\text{M}+\text{H}]^+$ ):  $m/z$  503.2823, found 503.2833.

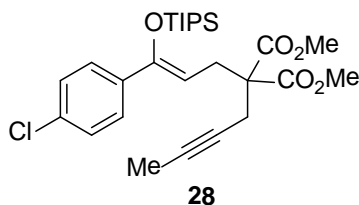

**(Z)-dimethyl-2-(but-2-ynyl)-2-(3-(4-chlorophenyl)-3-(triisopropylsilyloxy)allyl)malonate (28):** According to the general procedure B, ketone **S28** (289 mg, 0.82 mmol) was reacted under the standard conditions. The product was purified by flash column chromatography on silica gel (5% EtOAc in hexanes) to give **28** (269 mg, 65%) as an off-white solid:  $^1\text{H NMR}$  (600 MHz,  $\text{CDCl}_3$ )  $\delta$  7.33 (d,  $J = 8.4$  Hz, 2H), 7.25 (d,  $J = 8.4$  Hz, 2H), 4.78 (t,  $J = 7.0$  Hz, 1H), 3.72 (s, 6H), 2.98 (d,  $J = 7.0$  Hz, 2H), 2.77 (q,  $J = 2.6$  Hz, 2H), 1.74 (s, 3H), 1.18 – 0.97 (m, 21H);  $^{13}\text{C NMR}$  (151 MHz,  $\text{CDCl}_3$ )  $\delta$  170.7, 152.2, 138.4, 133.4, 128.1, 127.4, 104.4, 78.6, 73.5, 57.3, 52.6, 29.5, 23.6, 17.8, 13.4, 3.5; **HRMS** (ESI) calc for  $[\text{C}_{27}\text{H}_{40}\text{O}_5\text{SiCl}]^+$  ( $[\text{M}+\text{H}]^+$ ):  $m/z$  507.2328, found 507.2338.

b) Synthesis of Silyloxy-1,6-enynes 29

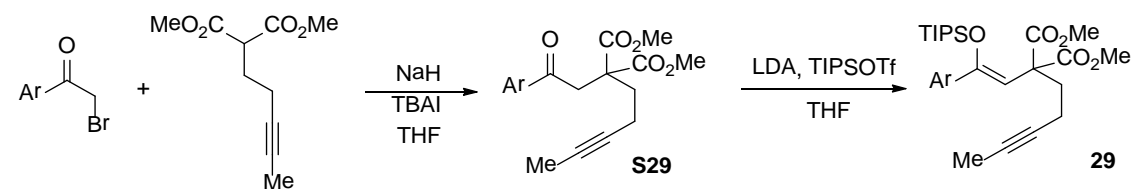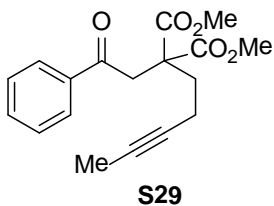

**Dimethyl-2-(2-oxo-2-phenylethyl)-2-(pent-3-ynyl)malonate (S29):** Alkyne (360 mg, 1.8 mmol) was dissolved in THF (0.4 M) and cooled to 0 °C. Then, NaH (60 % in oil, 88 mg, 2.1 mmol) was added in one portion. The reaction mixture was stirred for 30 min. at this temperature. The corresponding 3-chloroketone was dissolved in THF (0.5 M) and transferred slowly to the reaction mixture. The reaction was warmed to room temperature and then stirred at reflux for 5 h. The reaction mixture was quenched by the addition of an equal volume of sat. aq. NH<sub>4</sub>Cl. The mixture was extracted with Et<sub>2</sub>O (3 ×), and the combined organic layers were washed with brine, dried over MgSO<sub>4</sub>, filtered, and concentrated *in vacuo*. The residue was purified by flash column chromatography on silica gel (15% EtOAc in hexanes) to give **S29** (379 mg, 66%) as a pale yellow viscous oil: <sup>1</sup>H NMR (500 MHz, CDCl<sub>3</sub>) δ 7.98 (d, *J* = 7.7 Hz, 2H), 7.56 (t, *J* = 7.0 Hz, 1H), 7.46 (t, *J* = 7.6 Hz, 2H), 3.83 (s, 3H), 3.74 (s, 6H), 2.36 (t, *J* = 7.3 Hz, 2H), 2.18 – 2.10 (m, 2H), 1.67 – 1.28 (s, 3H); <sup>13</sup>C NMR (101 MHz, CDCl<sub>3</sub>) δ 196.4, 171.1, 136.4, 133.4, 128.6, 128.1, 77.9, 54.9, 52.9, 41.4, 31.8, 14.7, 3.2; **HRMS** (ESI) calc for [C<sub>18</sub>H<sub>21</sub>O<sub>5</sub>]<sup>+</sup> ([M+H]<sup>+</sup>): *m/z* 317.1384, found 317.1388.

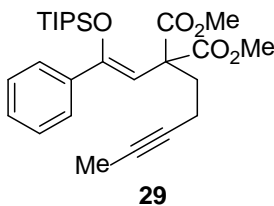

**(Z)-dimethyl-2-(pent-3-yn-10-yl)-2-(2-phenyl-2-((triisopropylsilyl)oxy)vinyl)malonate**

**(29)**: According to the general procedure B, 2-bromoketone **S29** (252 mg, 0.8 mmol) was reacted under the standard conditions. The product was purified by flash column chromatography on silica gel (5% EtOAc in hexanes) to give **29** (264 mg, 70%) as a pale yellow viscous oil:  $^1\text{H NMR}$  (300 MHz,  $\text{CDCl}_3$ )  $\delta$  7.50 – 7.21 (m, 5H), 5.59 (s, 1H), 3.72 (s, 6H), 2.54 (t,  $J = 8.0$  Hz, 2H), 2.25 – 2.09 (m, 2H), 1.83 – 1.65 (s, 3H), 1.17 – 0.80 (m, 21H);  $^{13}\text{C NMR}$  (126 MHz,  $\text{CDCl}_3$ )  $\delta$  170.8, 153.2, 140.1, 128.4, 127.9, 127.8, 104.9, 78.3, 75.8, 56.7, 52.7, 33.2, 17.8, 17.7, 14.7, 13.9, 3.5; **HRMS** (ESI) calc for  $[\text{C}_{27}\text{H}_{40}\text{O}_5\text{SiNa}]^+$  ( $[\text{M}+\text{Na}]^+$ ):  $m/z$  495.2537, found 495.2541.

#### IV. Gold(I) cyclizations for Silyloxy-1,6-enynes

**General Procedure C - Gold(I) cyclizations:** (*R*)-MeO-DTBM-BIPHEP( $\text{AuCl}$ )<sub>2</sub> (0.05 equiv.) and NaBARF (0.1 equiv.) was dissolved in dichloroethane (DCE, 0.1 M) and stir for 15 minutes at room temperature. The mixture was cooled at  $-30$  °C and a solution of the corresponding substrate (1.0 equiv.) in DCE (0.1 M) was transferred to the catalyst mixture. The solution was stirred at the specified temperature until consumption of the starting material as indicated by TLC (12-36 hours). The solution was concentrated and purified on silica gel.

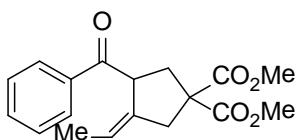

**23**

**(Z)-dimethyl 3-benzoyl-4-ethylidenecyclopentane-1,1-dicarboxylate (23)**: According to the general procedure C, enolsilane **22** (16.5 mg, 35  $\mu\text{mol}$ ) was reacted under the standard conditions. The product was purified by flash column chromatography on silica gel (15% EtOAc in hexanes) to give **23**<sup>4</sup> (9.3 mg, 84%) as a pale yellow viscous oil:  $^1\text{H NMR}$  (400 MHz,  $\text{CDCl}_3$ )  $\delta$  8.01 (d,  $J = 7.6$  Hz, 2H), 7.59 (t,  $J = 7.4$  Hz, 1H), 7.50 (t,  $J = 7.9$  Hz, 2H), 5.60 (q,  $J = 6.3$  Hz, 1H), 4.57 (t,  $J = 8.5$  Hz, 1H), 3.77 (s, 3H), 3.71 (s, 3H), 3.28 – 3.11 (m,

<sup>4</sup> The gold-catalyzed hydration of 1,6-diyne furnished product **23** in less than 5% yield, see: Sperger, C.; Fiksdahl, A. *Org. Lett.* **2009**, *11*, 2449.

1H), 3.05 – 2.83 (m, 2H), 2.26 (dd,  $J = 13.2, 8.1$  Hz, 1H), 1.40 (d,  $J = 6.8$  Hz, 3H);  $^{13}\text{C}$  NMR (151 MHz,  $\text{CDCl}_3$ )  $\delta$  200.0, 171.8, 171.0, 137.9 136.5, 133.3, 128.8, 128.6, 120.4, 59.4, 53.0, 52.8, 47.1, 42.4, 39.0, 15.2; **HRMS** (ESI) calc for  $[\text{C}_{18}\text{H}_{21}\text{O}_5]^+$  ( $[\text{M}+\text{H}]^+$ ):  $m/z$  317.1384, found 317.1386; **HPLC**: enantiomeric excess determined by HPLC with a Chiralpak IB column (99:1 hexanes : iPrOH, 1.0 ml/min, 204 nm); major enantiomer  $t_r = 26.5$  min, minor enantiomer  $t_r = 21.6$  min; 93% ee.

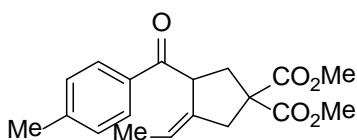

**30**

**(Z)-dimethyl-3-ethylidene-4-(4-methylbenzoyl)cyclopentane-1,1-dicarboxylate (30):**

According to the general procedure C, enolsilane **24** (17.0 mg, 35  $\mu\text{mol}$ ) was reacted under the standard conditions. The product was purified by flash column chromatography on silica gel (15% EtOAc in hexanes) to give **30** (9.6 mg, 83%) as a pale yellow viscous oil:  $^1\text{H}$  NMR (600 MHz,  $\text{CDCl}_3$ )  $\delta$  7.90 (d,  $J = 8.6$  Hz, 2H), 7.28 (d,  $J = 7.8$  Hz, 2H), 5.57 (q,  $J = 6.8$  Hz, 1H), 4.54 (t,  $J = 8.7$  Hz, 1H), 3.76 (s, 3H), 3.70 (s, 3H), 3.18 (dt,  $J = 15.5, 2.5$  Hz, 1H), 2.95 (m, 2H), 2.42 (s, 3H), 2.23 (dd,  $J = 13.2, 8.3$  Hz, 2H), 1.38 (d,  $J = 6.8$  Hz, 3H);  $^{13}\text{C}$  NMR (151 MHz,  $\text{CDCl}_3$ )  $\delta$  199.6, 171.8, 171.0, 144.0, 138.1, 134.0, 129.4, 128.6, 120.1, 59.4, 52.8, 52.7, 47.0, 42.5, 39.0, 21.6, 15.0; **HRMS** (ESI) calc for  $[\text{C}_{19}\text{H}_{23}\text{O}_5]^+$  ( $[\text{M}+\text{H}]^+$ ):  $m/z$  331.1546, found 331.1546; **HPLC**: enantiomeric excess determined by HPLC Chiralpak IB column (99:1 hexanes : iPrOH, 1.0 ml/min, 204 nm); major enantiomer  $t_r = 29.0$  min, minor enantiomer  $t_r = 24.6$  min; 86% ee.

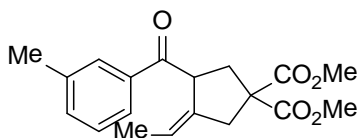

**31**

**(Z)-dimethyl-3-ethylidene-4-(3-methylbenzoyl)cyclopentane-1,1-dicarboxylate (31):**

According to the general procedure C, enolsilane **25** (17.0 mg, 35  $\mu\text{mol}$ ) was reacted under the standard conditions. The product was purified by flash column chromatography on silica gel (15% EtOAc in hexanes) to give **31** (10.3 mg, 86%) as a pale yellow viscous oil:  $^1\text{H NMR}$  (600 MHz,  $\text{CDCl}_3$ )  $\delta$  7.80 (s, 1H), 7.44 – 7.34 (m, 3H), 5.61 – 5.56 (q,  $J = 6.6$  Hz, 1H), 4.55 (t,  $J = 8.5$  Hz, 1H), 3.75 (s, 3H), 3.70 (s, 3H), 3.17(ddd,  $J = 15.4, 5.0, 2.6$  Hz, 1H), 3.02 – 2.87 (m, 2H), 2.43 (s, 3H), 2.24 (dd,  $J = 13.2, 8.1$  Hz, 1H), 1.39 (d,  $J = 6.8$  Hz, 3H);  $^{13}\text{C NMR}$  (151 MHz,  $\text{CDCl}_3$ )  $\delta$  200.2, 171.9, 171.0, 138.6, 138.0, 136.6, 134.0, 129.0, 128.6, 125.8, 120.2, 59.4, 52.9, 52.8, 47.2, 42.5, 39.0, 21.4, 15.1; **HRMS** (ESI) calc for  $[\text{C}_{19}\text{H}_{22}\text{O}_5\text{Na}]^+$  ( $[\text{M}+\text{Na}]^+$ ):  $m/z$  353.1359, found 353.1362; **HPLC**: enantiomeric excess determined by HPLC Chiralpak IB column (99:1 hexanes : iPrOH, 1.0 ml/min, 204 nm); major enantiomer  $t_r = 26.8$  min, minor enantiomer  $t_r = 19.8$  min; 90% ee.

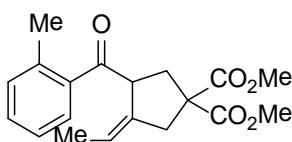

**32**

**(Z)-dimethyl-3-ethylidene-4-(2-methylbenzoyl)cyclopentane-1,1-dicarboxylate (32):**

According to the general procedure C, enolsilane **26** (17.0 mg, 35  $\mu\text{mol}$ ) was reacted under the standard conditions. The product was purified by flash column chromatography on silica gel (15% EtOAc in hexanes) to give **32** (8.3 mg, 70%) as a pale yellow viscous oil:  $^1\text{H NMR}$  (400 MHz,  $\text{CDCl}_3$ )  $\delta$  7.65 (d,  $J = 7.6$  Hz, 1H), 7.41 – 7.34 (m, 1H), 7.32 – 7.21 (m, 2H), 5.54 (q,  $J = 6.9$  Hz, 1H), 4.45 (t,  $J = 7.6$  Hz, 1H), 3.75 (s, 3H), 3.74 (s, 3H), 3.13 (dd,  $J = 15.4, 2.5$  Hz, 1H), 2.98 – 2.79 (m, 2H), 2.48 – 2.40 (m, 4H), 1.30 (dd,  $J = 6.8, 2.3$  Hz, 3H);  $^{13}\text{C NMR}$  (101 MHz,  $\text{CDCl}_3$ )  $\delta$   $^{13}\text{C NMR}$  (126 MHz,  $\text{CDCl}_3$ )  $\delta$  203.4, 171.9, 171.2, 138.3, 138.1, 137.6, 131.8, 131.2, 128.1, 125.7, 120.6, 59.2, 52.9, 52.9, 50.2, 42.1, 37.5, 20.8, 14.9; **HRMS** (ESI) calc for  $[\text{C}_{19}\text{H}_{22}\text{O}_5\text{Na}]^+$  ( $[\text{M}+\text{Na}]^+$ ):  $m/z$  353.1359, found 353.1363; **HPLC**: enantiomeric excess determined by HPLC Chiralpak IB column (99.2:0.8 hexanes : iPrOH, 0.8 ml/min, 205 nm); major enantiomer  $t_r = 36.7$  min, minor enantiomer  $t_r = 35.4$  min; 91% ee.

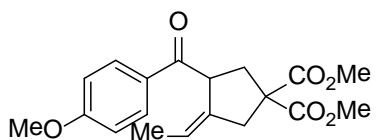

33

**(Z)-dimethyl-3-ethylidene-4-(4-methoxybenzoyl)cyclopentane-1,1-dicarboxylate (33):**

According to the general procedure C, enolsilane **26** (17.5 mg, 35  $\mu\text{mol}$ ) was reacted under the standard conditions. The product was purified by flash column chromatography on silica gel (15% EtOAc in hexanes) to give **33** (9.8 mg, 81%) as a pale yellow viscous oil:  $^1\text{H NMR}$  (600 MHz,  $\text{CDCl}_3$ )  $\delta$  8.02 (d,  $J = 8.6$  Hz, 2H), 6.98 (d,  $J = 8.8$  Hz, 2H), 5.59 (q,  $J = 6.5$  Hz, 1H), 4.55 (t,  $J = 8.6$  Hz, 1H), 3.91 (s, 3H), 3.78 (s, 3H), 3.73 (s, 3H), 3.25 – 3.17 (m, 1H), 3.04 – 2.93 (m, 2H), 2.25 (dd,  $J = 13.1, 8.4$  Hz, 1H), 1.42 (d,  $J = 6.3$  Hz, 3H);  $^{13}\text{C NMR}$  (151 MHz,  $\text{CDCl}_3$ )  $\delta$  198.6, 171.8, 171.0, 163.6, 138.2, 130.8, 129.4, 120.0, 113.9, 59.4, 55.5, 52.8, 52.7, 46.7, 42.5, 39.1, 15.0; **HRMS** (ESI) calc for  $[\text{C}_{19}\text{H}_{23}\text{O}_6]^+$  ( $[\text{M}+\text{H}]^+$ ):  $m/z$  347.1489, found 347.1488. **HPLC**: enantiomeric excess determined by HPLC Chiralpak IB column (98:2 hexanes : iPrOH, 1.0 ml/min, 244 nm); major enantiomer  $t_r = 21.8$  min, minor enantiomer  $t_r = 19.7$  min; 79% ee.

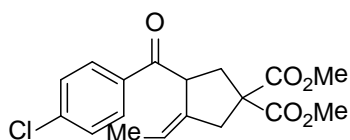

34

**(Z)-dimethyl-3-(4-chlorobenzoyl)-4-ethylidenecyclopentane-1,1-dicarboxylate (34):**

According to the general procedure C, enolsilane **28** (17.1 mg, 35  $\mu\text{mol}$ ) was reacted under the standard conditions. The product was purified by flash column chromatography on silica gel (15% EtOAc in hexanes) to give **S1a** (8.6 mg, 73%) as a pale yellow viscous oil:  $^1\text{H NMR}$  (600 MHz,  $\text{CDCl}_3$ )  $\delta$  7.94 (d,  $J = 8.6$  Hz, 2H), 7.46 (d,  $J = 8.5$  Hz, 2H), 5.59 (q,  $J = 6.7$  Hz, 1H), 4.50 (t,  $J = 8.6$  Hz, 1H), 3.76 (s, 3H), 3.71 (s, 3H), 3.16 (dq,  $J = 15.9, 2.6$  Hz, 1H), 3.00 – 2.89 (m, 2H), 2.23 (dd,  $J = 13.3, 8.1$  Hz, 1H), 1.42 – 1.35 (dd,  $J = 6.9, 2.6$  Hz, 3H);  $^{13}\text{C NMR}$  (151 MHz,  $\text{CDCl}_3$ )  $\delta$  198.8, 171.7, 170.9, 139.7, 137.7, 134.8, 129.9, 129.0, 120.4, 59.3, 52.9, 52.7, 47.1, 42.3, 38.8, 31.9, 31.8, 15.1; **HRMS** (ESI) calc for  $[\text{C}_{18}\text{H}_{19}\text{O}_5\text{ClNa}]^+$  ( $[\text{M}+\text{Na}]^+$ ):  $m/z$  373.0813, found 373.0816. **HPLC**: enantiomeric excess determined by HPLC Chiralpak

IB column (99:1 hexanes : iPrOH, 1.0 ml/min, 210 nm); major enantiomer  $t_r = 28.9$  min, minor enantiomer  $t_r = 20.2$  min; 70% ee.

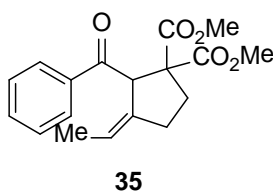

**(Z)-dimethyl-2-benzoyl-3-ethylidenecyclopentane-1,1-dicarboxylate (35):** According to the general procedure C, enolsilane **29** (16.6 mg, 35  $\mu\text{mol}$ ) was reacted under the standard conditions. The product was purified by flash column chromatography on silica gel (15% EtOAc in hexanes) to give **35** (8.8 mg, 79%) as a pale yellow viscous oil:  $^1\text{H NMR}$  (600 MHz,  $\text{CDCl}_3$ )  $\delta$  8.05 (d,  $J = 7.6$  Hz, 2H), 7.59 (t,  $J = 7.5$  Hz, 1H), 7.51 (t,  $J = 7.6$  Hz, 2H), 5.45 – 5.40 (m, 1H), 5.40 (s, 1H), 3.81 (s, 3H), 3.44 (s, 3H), 2.86 (ddd,  $J = 13.1, 9.8, 8.0$  Hz, 1H), 2.77 – 2.68 (m, 1H), 2.48 – 2.41 (m, 1H), 2.31 (ddd,  $J = 13.0, 8.2, 4.7$  Hz, 1H), 1.40 (d,  $J = 6.3$  Hz, 3H);  $^{13}\text{C NMR}$  (151 MHz,  $\text{CDCl}_3$ )  $\delta$  140.1, 132.9, 128.6, 128.6, 119.6, 65.2, 53.3, 53.2, 52.4, 32.1, 31.2, 15.4; **HRMS** (ESI) calc for  $[\text{C}_{18}\text{H}_{21}\text{O}_5]^+$  ( $[\text{M}+\text{H}]^+$ ):  $m/z$  317.1384, found 317.1388; **HPLC**: enantiomeric excess determined by HPLC Chiralpak IB column (99:1 hexanes : iPrOH, 1.0 ml/min, 244 nm); major enantiomer  $t_r = 13.0$  min, minor enantiomer  $t_r = 11.0$  min; 50% ee.

## V. Synthesis of Silyloxy-1,5-enynes

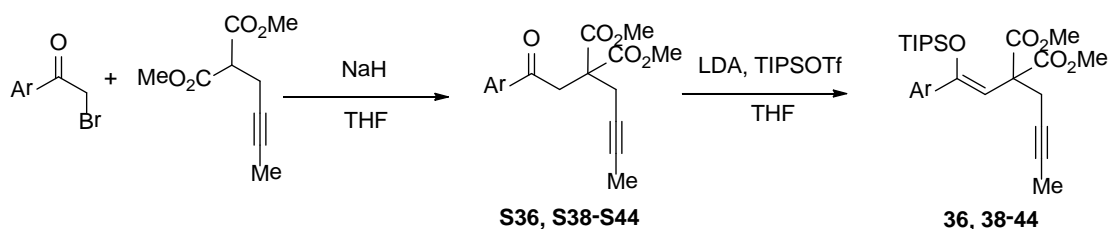

**General Procedure D - Preparation of Aryl ketones:** The alkyne was dissolved in THF (0.4 M) and cooled to 0 °C. Then, NaH (60 % in oil, 1.1 equiv.) was added in one portion. The reaction mixture was stirred for 30 min. at this temperature. The corresponding 2-bromoketone was dissolved in THF (0.5 M) and transferred slowly to the reaction mixture.



The reaction was warmed to room temperature and quenched by the addition of an equal volume of sat. aq.  $\text{NH}_4\text{Cl}$ . The mixture was extracted with  $\text{Et}_2\text{O}$  (3 $\times$ ), and the combined organic layers were washed with brine, dried over  $\text{MgSO}_4$ , filtered, and concentrated *in vacuo*. The residue was purified by flash column chromatography to provide analytically pure compounds.

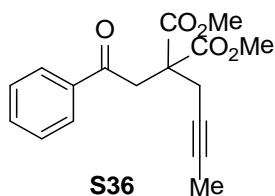

**Dimethyl-2-(but-2-ynyl)-2-(2-oxo-2-phenylethyl)malonate (S36):**

According to the general procedure D, the corresponding 2-bromoketone (0.94 g, 4.7 mmol) was reacted under the standard conditions. The product was purified by flash column chromatography on silica gel (15% EtOAc in hexanes) to give **S36** (0.99 g, 70%) as a pale yellow viscous oil:  $^1\text{H NMR}$  (400 MHz,  $\text{CDCl}_3$ )  $\delta$  8.09 – 8.03 (m, 2H), 7.64 (t,  $J = 7.4$  Hz, 1H), 7.53 (t,  $J = 7.6$  Hz, 2H), 5.34 (s, 3H), 3.94 (s, 2H), 3.80 (s, 6H), 3.09 (q,  $J = 2.5$  Hz, 2H), 1.76 (t,  $J = 2.6$  Hz, 3H);  $^{13}\text{C NMR}$  (101 MHz,  $\text{CDCl}_3$ )  $\delta$  196.8, 170.1, 136.4, 133.4, 128.6, 128.1, 79.3, 73.7, 54.9, 53.0, 41.1, 23.8, 3.5; **HRMS** (ESI) calc for  $[(\text{C}_{17}\text{H}_{18}\text{O}_5\text{Na})^+]$  ( $[\text{M}+\text{Na}]^+$ ):  $m/z$  325.1046, found 325.1043.

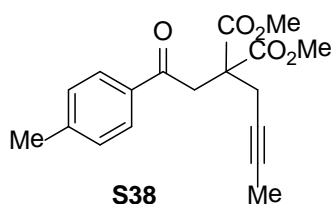

**Dimethyl-2-(but-2-ynyl)-2-(2-oxo-2-p-tolylolethyl)malonate (S38):**

According to the general procedure D, the corresponding 2-bromoketone (0.60 g, 2.8 mmol) was reacted under the standard conditions. The product was purified by flash column chromatography on silica gel (15% EtOAc in hexanes) to give **S38** (0.69 g, 78%) as an off-white solid:  $^1\text{H NMR}$  (600 MHz,  $\text{CDCl}_3$ )  $\delta$  7.94 (d,  $J = 7.9$  Hz, 2H), 7.30 (d,  $J = 8.1$  Hz, 2H), 3.89 (s, 2H), 3.78 (s, 6H), 3.06 (s, 2H), 2.45 (s, 3H), 1.74 (s, 3H);  $^{13}\text{C NMR}$  (151 MHz,

CDCl<sub>3</sub>) δ 196.4, 170.2, 144.3, 134.1, 129.3, 128.3, 79.3, 73.8, 55.0, 53.0, 41.0, 23.8, 21.7, 3.5;  
**HRMS** (ESI) calc for [C<sub>18</sub>H<sub>20</sub>O<sub>5</sub>Na]<sup>+</sup> ([M+Na]<sup>+</sup>): *m/z* 339.1203, found 339.1202.

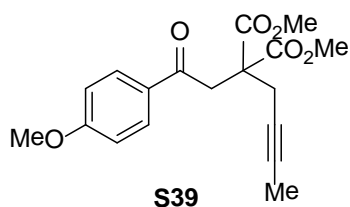

**Dimethyl-2-(but-2-ynyl)-2-(2-(4-methoxyphenyl)-2-oxoethyl)malonate (S39):** According to the general procedure D, the corresponding 2-bromoketone (0.41 g, 1.8 mmol) was reacted under the standard conditions. The product was purified by flash column chromatography on silica gel (20% EtOAc in hexanes) to give **S39** (0.47 g, 78%) as an off-white solid: **<sup>1</sup>H NMR** (400 MHz, CDCl<sub>3</sub>) δ 8.01 (d, *J* = 8.9 Hz, 2H), 6.97 (d, *J* = 8.9 Hz, 2H), 3.90 (s, 3H), 3.86 (s, 2H), 3.78 (s, 6H), 3.05 (d, *J* = 2.5 Hz, 2H), 1.73 (t, *J* = 2.5 Hz, 3H); **<sup>13</sup>C NMR** (101 MHz, CDCl<sub>3</sub>) δ 195.3, 170.2, 163.8, 130.5, 129.6, 113.8, 79.2, 73.9, 55.5, 55.0, 53.0, 40.7, 23.8, 3.5; **HRMS** (ESI) calc for [C<sub>18</sub>H<sub>20</sub>O<sub>6</sub>Na]<sup>+</sup> ([M+Na]<sup>+</sup>): *m/z* 355.1152, found 355.1151.

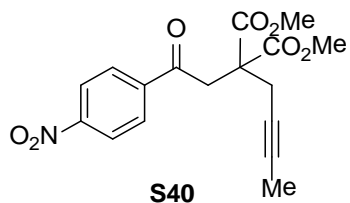

**Dimethyl-2-(but-2-ynyl)-2-(2-(4-nitrophenyl)-2-oxoethyl)malonate (S40):** According to the general procedure D, the corresponding 2-bromoketone (0.45 g, 1.8 mmol) was reacted under the standard conditions. The product was purified by flash column chromatography on silica gel (20% EtOAc in hexanes) to give **S40** (0.43 g, 69%) as a pale yellow solid: **<sup>1</sup>H NMR** (400 MHz, CDCl<sub>3</sub>) δ 8.38 (d, *J* = 8.9 Hz, 2H), 8.21 (d, *J* = 8.9 Hz, 2H), 5.34 (s, 3H), 3.94 (s, 2H), 3.82 (s, 6H), 3.08 (d, *J* = 2.6 Hz, 2H), 1.76 (t, *J* = 2.6 Hz, 3H); **<sup>13</sup>C NMR** (151 MHz, CDCl<sub>3</sub>) δ 195.5, 169.8, 150.6, 140.9, 129.2, 123.9, 79.8, 73.5, 55.1, 53.2, 41.7, 23.9, 3.5; **HRMS** (ESI) calc for [C<sub>17</sub>H<sub>17</sub>O<sub>7</sub>NNa]<sup>+</sup> ([M+Na]<sup>+</sup>): *m/z* 370.0897, found 370.0900.

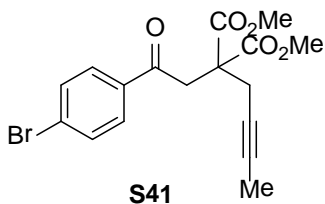

**Dimethyl-2-(2-(4-bromophenyl)-2-oxoethyl)-2-(but-2-ynyl)malonate (S41):** According to the general procedure D, the corresponding 2-bromoketone (0.50 g, 1.8 mmol) was reacted under the standard conditions. The product was purified by flash column chromatography on silica gel (15% EtOAc in hexanes) to give **S41** (0.51 g, 75%) as an off-white solid: **<sup>1</sup>H NMR** (400 MHz, CDCl<sub>3</sub>) δ 7.88 (d, *J* = 8.6 Hz, 2H), 7.63 (d, *J* = 8.6 Hz, 2H), 3.85 (s, 2H), 3.77 (s, 6H), 3.04 (d, *J* = 2.5 Hz, 2H), 1.72 (t, *J* = 2.5 Hz, 3H); **<sup>13</sup>C NMR** (101 MHz, CDCl<sub>3</sub>) δ 195.9, 169.9, 135.2, 131.9, 129.7, 128.7, 79.5, 73.6, 54.9, 53.1, 41.0, 23.8, 3.5; **HRMS** (ESI) calc for [C<sub>17</sub>H<sub>17</sub>O<sub>5</sub>BrNa]<sup>+</sup> ([M+Na]<sup>+</sup>): *m/z* 403.0152, found 403.0152.

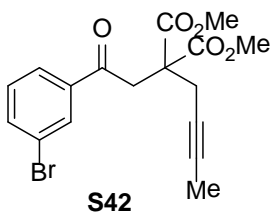

**Dimethyl-2-(2-(3-bromophenyl)-2-oxoethyl)-2-(but-2-ynyl)malonate (S42):** According to the general procedure D, the corresponding 2-bromoketone (0.30 g, 1.1 mmol) was reacted under the standard conditions. The product was purified by flash column chromatography on silica gel (15% EtOAc in hexanes) to give **S42** (0.27 g, 65%) as a yellow solid: **<sup>1</sup>H NMR** (300 MHz, CDCl<sub>3</sub>) δ 8.16 (t, *J* = 1.7 Hz, 1H), 7.95 (d, *J* = 7.8 Hz, 1H), 7.77 – 7.69 (m, 1H), 7.39 (t, *J* = 7.9 Hz, 1H), 3.87 (s, 2H), 3.78 (s, 6H), 3.05 (q, *J* = 2.5 Hz, 2H), 1.75 (t, *J* = 2.6 Hz, 3H); **<sup>13</sup>C NMR** (151 MHz, CDCl<sub>3</sub>) δ 195.6, 167.0, 138.2, 136.3, 131.3, 130.3, 126.7, 123.0, 79.6, 73.6, 54.9, 53.1, 41.2, 23.8, 3.6; **HRMS** (ESI) calc for [C<sub>17</sub>H<sub>17</sub>O<sub>5</sub>BrNa]<sup>+</sup> ([M+Na]<sup>+</sup>): *m/z* 403.0152, found 403.0151.

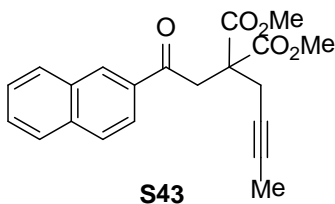

**Dimethyl-2-(but-2-ynyl)-2-(2-(naphthalen-2-yl)-2-oxoethyl)malonate (S43):** According to the general procedure D, the corresponding 2-bromoketone (0.37 g, 1.5 mmol) was reacted under the standard conditions. The product was purified by flash column chromatography on silica gel (15% EtOAc in hexanes) to give **S43** (0.42 g, 80%) as an off-white solid:  $^1\text{H NMR}$  (400 MHz,  $\text{CDCl}_3$ )  $\delta$  8.61 (s, 1H), 8.07 (dd,  $J = 8.6, 1.6$  Hz, 1H), 8.02 (d,  $J = 8.1$  Hz, 1H), 7.92 (dd,  $J = 12.5, 8.4$  Hz, 2H), 7.67 – 7.62 (m, 1H), 7.61 – 7.59 (m, 1H), 4.07 (s, 2H), 3.81 (s, 6H), 3.12 (d,  $J = 2.5$  Hz, 2H), 1.74 (t,  $J = 2.5$  Hz, 3H);  $^{13}\text{C NMR}$  (101 MHz,  $\text{CDCl}_3$ )  $\delta$  196.8, 170.2, 135.8, 132.5, 130.1, 129.6, 128.7, 128.5, 127.8, 126.9, 123.7, 79.4, 73.8, 55.5, 55.1, 53.1, 41.2, 23.8, 3.6; **HRMS** (ESI) calc for  $[\text{C}_{21}\text{H}_{20}\text{O}_5\text{Na}]^+$  ( $[\text{M}+\text{Na}]^+$ ):  $m/z$  375.1203, found 375.1201.

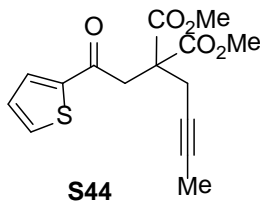

**Dimethyl-2-(but-2-ynyl)-2-(2-oxo-2-(thiophen-2-yl)ethyl)malonate (S44):** According to the general procedure D, the corresponding 2-bromoketone (0.23 g, 1.1 mmol) was reacted under the standard conditions. The product was purified by flash column chromatography on silica gel (25% EtOAc in hexanes) to give **S44** (0.26 g, 78%) as a light brown solid:  $^1\text{H NMR}$  (600 MHz,  $\text{CDCl}_3$ )  $\delta$  7.85 (d,  $J = 3.1$  Hz, 1H), 7.69 (d,  $J = 4.9$  Hz, 1H), 7.20 – 7.15 (m, 1H), 3.85 (s, 2H), 3.79 (s, 6H), 3.04 (d,  $J = 2.5$  Hz, 2H), 1.75 (t,  $J = 2.5$  Hz, 3H);  $^{13}\text{C NMR}$  (151 MHz,  $\text{CDCl}_3$ )  $\delta$  189.7, 169.9, 143.7, 134.1, 132.4, 128.2, 79.5, 73.7, 55.0, 53.1, 41.5, 23.8, 3.5; **HRMS** (ESI) calc for  $[\text{C}_{15}\text{H}_{16}\text{O}_5\text{SNa}]^+$  ( $[\text{M}+\text{Na}]^+$ ):  $m/z$  331.0611, found 331.0609.

**General Procedure E - Preparation of enolsilanes:** A solution of diisopropylamine (1.1 equiv) in THF (0.5 M) was cooled to  $-78\text{ }^{\circ}\text{C}$  and *n*-butyllithium (1.6 M solution of in *n*-hexane, 1.05 equiv.) was added slowly by a syringe. This mixture was stirred for 20 min at  $-78\text{ }^{\circ}\text{C}$  and a solution (0.5 M) of the corresponding ketone (1.0 equiv) was added. The mixture was stirred for an additional 30 min and TIPSOTf (1.2 equiv) was added. The solution was stirred for 1.5 h at  $-78\text{ }^{\circ}\text{C}$  and subsequently allowed to warm up to room temperature. The reaction was quenched by the addition of an equal volume of sat. aq.  $\text{NH}_4\text{Cl}$ . The mixture was extracted with EtOAc (3  $\times$ ), and the combined organic layers were washed with brine, dried over  $\text{MgSO}_4$ , filtered, and concentrated *in vacuo*. The residue was purified by flash column chromatography to provide analytically pure compounds.

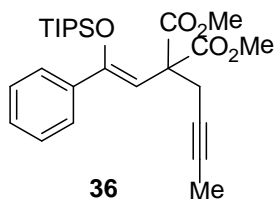

**(Z)-dimethyl-2-(but-2-ynyl)-2-(2-phenyl-2-(triisopropylsilyloxy)vinyl)malonate (36):**

According to the general procedure E, ketone **S36** (0.22 g, 0.72 mmol) was reacted under the standard conditions. The product was purified by flash column chromatography on silica gel (12% EtOAc in hexanes) to give **36** (0.24 g, 74%) as a pale yellow solid:  $^1\text{H NMR}$  (600 MHz,  $\text{CDCl}_3$ )  $\delta$  7.42 – 7.37 (m, 2H), 7.32 – 7.27 (m, 3H), 5.34 (s, 1H), 3.75 (d,  $J = 7.8\text{ Hz}$ , 6H), 3.16 (d,  $J = 2.2\text{ Hz}$ , 2H), 1.75 (s, 3H), 1.05 (s, 3H), 0.97 (d,  $J = 6.2\text{ Hz}$ , 18H);  $^{13}\text{C NMR}$  (151 MHz,  $\text{CDCl}_3$ )  $\delta$  170.1, 153.1, 140.0, 128.3, 128.0, 127.8, 105.7, 77.8, 74.4, 56.7, 52.8, 25.1, 17.8, 17.7, 13.9, 12.3, 3.5; **HRMS** (ESI) calc for  $[\text{C}_{26}\text{H}_{39}\text{O}_5\text{Si}]^+$  ( $[\text{M}+\text{H}]^+$ ):  $m/z$  459.2561, found 459.2569.

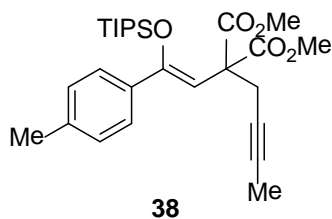

**(Z)-dimethyl-2-(but-2-ynyl)-2-(2-p-tolyl-2-(triisopropylsilyloxy)vinyl)malonate (38):**

According to the general procedure E, ketone **S38** (0.20 g, 0.63 mmol) was reacted under the standard conditions. The product was purified by flash column chromatography on silica gel (12% EtOAc in hexanes) to give **38** (0.21 g, 70%) as a yellow viscous oil:  $^1\text{H NMR}$  (400 MHz,  $\text{CDCl}_3$ )  $\delta$  7.32 (d,  $J = 9.7$  Hz, 4H), 7.14 (d,  $J = 7.9$  Hz, 2H), 5.35 (s, 1H), 3.78 (s, 6H), 3.20 (d,  $J = 2.5$  Hz, 2H), 2.39 (s, 3H), 1.79 (t,  $J = 2.5$  Hz, 3H), 1.02 (d,  $J = 5.3$  Hz, 18H), 0.98 (m, 3H);  $^{13}\text{C NMR}$  (151 MHz,  $\text{CDCl}_3$ )  $\delta$  170.1, 153.1, 138.1, 137.2, 128.5, 127.9, 105.3, 77.7, 74.5, 56.7, 25.1, 21.3, 17.9, 17.7, 13.9, 12.3; **HRMS** (ESI) calc for  $[\text{C}_{27}\text{H}_{40}\text{O}_5\text{SiNa}]^+$  ( $[\text{M}+\text{Na}]^+$ ):  $m/z$  495.2537, found 495.2540.

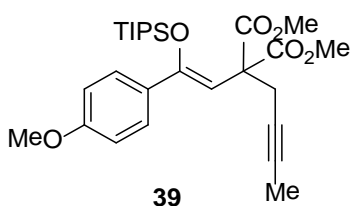

**(Z)-dimethyl-2-(but-2-ynyl)-2-(2-(4-methoxyphenyl)-2-**

**(triisopropylsilyloxy)vinyl)malonate (39):** According to the general procedure E, ketone **S39** (0.098 g, 0.29 mmol) was reacted under the standard conditions. The product was purified by flash column chromatography on silica gel (12% EtOAc in hexanes) to give **39** (0.10 g, 71%) as a yellow viscous oil:  $^1\text{H NMR}$  (400 MHz,  $\text{CDCl}_3$ )  $\delta$  7.35 (d,  $J = 8.7$  Hz, 2H), 6.86 (d,  $J = 8.7$  Hz, 2H), 5.32 (s, 1H), 3.86 (s, 3H), 3.78 (s, 6H), 3.19 (d,  $J = 2.5$  Hz, 2H), 1.79 (t,  $J = 2.5$  Hz, 3H), 1.09 (s, 3H), 1.03 (d,  $J = 5.5$  Hz, 18H);  $^{13}\text{C NMR}$  (151 MHz,  $\text{CDCl}_3$ )  $\delta$  170.2, 159.7, 152.8, 132.7, 129.4, 113.1, 105.1, 77.7, 74.5, 56.76, 55.3, 52.8, 25.1, 17.9, 13.9, 3.6; **HRMS** (ESI) calc for  $[\text{C}_{27}\text{H}_{41}\text{O}_6\text{Si}]^+$  ( $[\text{M}+\text{H}]^+$ ):  $m/z$  489.2667, found 489.2668.

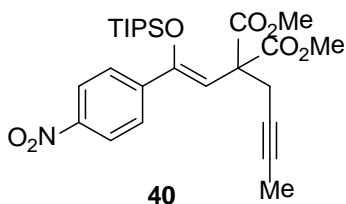

**(Z)-dimethyl-2-(but-2-ynyl)-2-(2-(4-nitrophenyl)-2-(triisopropylsilyloxy)vinyl)malonate**

**(40):** According to the general procedure E, ketone **S40** (0.18 g, 0.52 mmol) was reacted under the standard conditions. The product was purified by flash column chromatography on silica

gel (15% EtOAc in hexanes) to give **40** (0.17 g, 68%) as a brown viscous oil:  $^1\text{H NMR}$  (400 MHz,  $\text{CDCl}_3$ )  $\delta$  8.23 (d,  $J = 8.8$  Hz, 2H), 7.62 (d,  $J = 8.8$  Hz, 2H), 5.55 (s, 1H), 3.80 (s, 6H), 3.21 (d,  $J = 2.5$  Hz, 2H), 1.79 (t,  $J = 2.5$  Hz, 3H), 1.09 (s, 3H), 1.04 (d,  $J = 6.2$  Hz, 18H);  $^{13}\text{C NMR}$  (101 MHz,  $\text{CDCl}_3$ )  $\delta$  169.6, 150.9, 147.6, 146.6, 128.4, 123.4, 108.7, 78.2, 73.9, 56.7, 53.0, 25.0, 17.8, 14.0, 3.6; **HRMS** (ESI) calc for  $[\text{C}_{26}\text{H}_{37}\text{O}_7\text{NSiNa}]^+$  ( $[\text{M}+\text{Na}]^+$ ):  $m/z$  526.2232, found 526.2240.

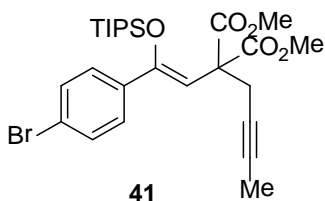

**(Z)-dimethyl-2-(2-(4-bromophenyl)-2-(triisopropylsilyloxy)vinyl)-2-(but-2-ynyl)malonate (41)**: According to the general procedure E, ketone **S41** (0.18 g, 0.46 mmol) was reacted under the standard conditions. The product was purified by flash column chromatography on silica gel (12% EtOAc in hexanes) to give **41** (0.18 g, 73%) as a pale yellow solid:  $^1\text{H NMR}$  (300 MHz,  $\text{CDCl}_3$ )  $\delta$  7.43 (d,  $J = 8.5$  Hz, 2H), 7.26 (d,  $J = 7.4$  Hz, 2H), 5.34 (s, 1H), 3.74 (s, 6H), 3.14 (q,  $J = 2.4$  Hz, 2H), 1.74 (t,  $J = 2.5$  Hz, 3H), 0.98 (d,  $J = 5.2$  Hz, 18H), 0.92 (m, 3H);  $^{13}\text{C NMR}$  (151 MHz,  $\text{CDCl}_3$ )  $\delta$  169.9, 151.9, 139.1, 131.1, 129.6, 122.4, 106.4, 77.9, 74.3, 56.7, 52.9, 25.0, 17.9, 17.7, 13.9, 3.6; **HRMS** (ESI) calc for  $[\text{C}_{26}\text{H}_{37}\text{O}_5\text{BrSiNa}]^+$  ( $[\text{M}+\text{Na}]^+$ ):  $m/z$  559.1486, found 559.1487.

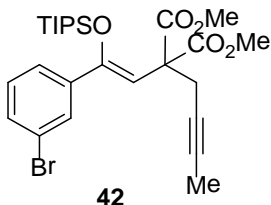

**(Z)-dimethyl-2-(2-(3-bromophenyl)-2-(triisopropylsilyloxy)vinyl)-2-(but-2-ynyl)malonate (42)**: According to the general procedure E, ketone **S42** (0.18 g, 0.46 mmol) was reacted under the standard conditions. The product was purified by flash column chromatography on silica gel (12% EtOAc in hexanes) to give **42** (0.17 g, 70%) as a yellow solid:  $^1\text{H NMR}$  (400 MHz,  $\text{CDCl}_3$ )  $\delta$  7.57 (s, 1H), 7.45 (d,  $J = 8.0$  Hz, 1H), 7.35 (d,  $J = 7.7$  Hz, 1H), 7.20 (t,  $J = 7.8$  Hz, 1H), 5.40 (s, 1H), 3.77 (s, 7H), 3.17 (d,  $J = 2.4$  Hz, 2H), 1.77 (t,  $J = 2.3$  Hz, 3H), 1.01 (d,  $J =$

6.6 Hz, 18H), 0.98 – 0.94 (m, 3H);  $^{13}\text{C}$  NMR (151 MHz,  $\text{CDCl}_3$ )  $\delta$  169.9, 151.5, 142.1, 131.3, 130.9, 129.6, 126.5, 121.9, 106.7, 78.0, 74.2, 56.6, 52.9, 25.0, 17.8, 17.7, 13.9, 12.3, 3.6; HRMS (ESI) calc for  $[\text{C}_{26}\text{H}_{38}\text{O}_5\text{BrSi}]^+$  ( $[\text{M}+\text{H}]^+$ ):  $m/z$  537.1666, found 537.1675.

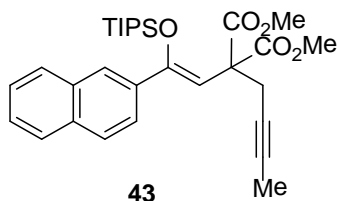

**(Z)-dimethyl-2-(but-2-ynyl)-2-(2-(naphthalen-2-yl)-2-**

**(triisopropylsilyloxy)vinyl)malonate (43):** According to the general procedure E, ketone **S43** (0.16 g, 0.50 mmol) was reacted under the standard conditions. The product was purified by flash column chromatography on silica gel (10% EtOAc in hexanes) to give **43** (0.22 g, 85%) as a off-white solid:  $^1\text{H}$  NMR (600 MHz,  $\text{CDCl}_3$ )  $\delta$  7.91 (s, 1H), 7.85 (dd,  $J = 9.1, 6.6$  Hz, 2H), 7.81 (d,  $J = 8.4$  Hz, 1H), 7.55 (dd,  $J = 8.4, 1.4$  Hz, 1H), 7.55 – 7.50 (m, 2H), 5.51 (s, 1H), 3.80 (s, 6H), 3.24 (d,  $J = 2.4$  Hz, 2H), 1.81 (t,  $J = 2.3$  Hz, 3H), 1.02 (d,  $J = 6.0$  Hz, 18H), 1.00 – 0.95 (m, 3H);  $^{13}\text{C}$  NMR (151 MHz,  $\text{CDCl}_3$ )  $\delta$  170.1, 153.1, 137.5, 133.1, 132.8, 128.2, 127.7, 127.5, 126.8, 126.3, 126.2, 125.9, 106.4, 77.9, 74.5, 56.9, 52.9, 25.2, 17.9, 14.0, 3.6; HRMS (ESI) calc for  $[\text{C}_{30}\text{H}_{41}\text{O}_5\text{Si}]^+$  ( $[\text{M}+\text{H}]^+$ ):  $m/z$  509.2718, found 509.2726.

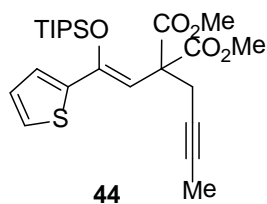

**(Z)-dimethyl-2-(but-2-ynyl)-2-(2-(thiophen-2-yl)-2-(triisopropylsilyloxy)vinyl)malonate**

**(44):** According to the general procedure E, ketone **S44** (0.23 g, 0.75 mmol) was reacted under the standard conditions. The product was purified by flash column chromatography on silica gel (10% EtOAc in hexanes) to give **44** (0.26 g, 75%) as a brown viscous oil:  $^1\text{H}$  NMR (400 MHz,  $\text{CDCl}_3$ )  $\delta$  7.23 (d,  $J = 5.1$  Hz, 1H), 7.11 (d,  $J = 3.4$  Hz, 1H), 6.98 – 6.94 (m, 1H), 5.57 (s, 1H), 3.77 (s, 6H), 3.16 (d,  $J = 2.2$  Hz, 2H), 1.77 (s, 3H), 1.12 (s, 3H), 1.11 – 1.01 (s, 18H);  $^{13}\text{C}$  NMR (101 MHz,  $\text{CDCl}_3$ )  $\delta$  169.9, 145.6, 141.4, 126.7, 126.5, 125.3, 107.6, 78.0, 74.2,



56.8, 25.0, 17.9, 17.7, 14.1, 12.3, 3.6; **HRMS** (ESI) calc for  $[C_{24}H_{37}O_5SSi]^+$  ( $[M+H]^+$ ):  $m/z$  465.2126, found 465.2130.

#### Synthesis of substrate **54**

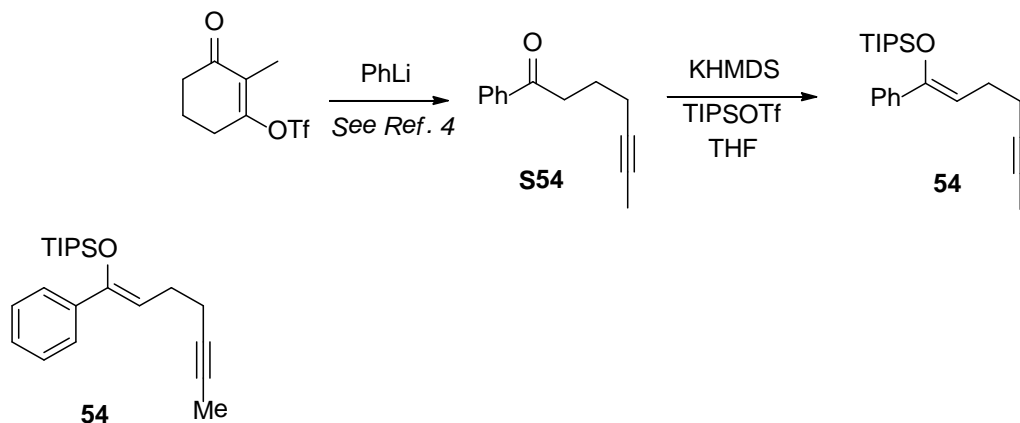

**(Z)-triisopropyl(1-phenylhept-1-en-5-ynoxy)silane (54):** A solution of diisopropylamine (104  $\mu$ l) in THF (0.5 M) was cooled to  $-78$   $^{\circ}$ C and n-butyllithium (287  $\mu$ l, 1.6 M solution of in n-hexane, 1.05 equiv.) was added slowly by a syringe. This mixture was stirred for 20 min at  $-78$   $^{\circ}$ C and a solution (0.5 M) of ketone **S54**<sup>5</sup> (0.12 g, 0.67 mmol 1.0 equiv) was added. The mixture was stirred for an additional 30 min and TIPSOTf (336  $\mu$ l, 1.2 equiv) was added. The solution was stirred for 1.5 h at  $-78$   $^{\circ}$ C and subsequently allowed to warm up to room temperature. The reaction was quenched by the addition of an equal volume of sat. aq.  $NH_4Cl$ . The mixture was extracted with EtOAc (3  $\times$ ), and the combined organic layers were washed with brine, dried over  $MgSO_4$ , filtered, and concentrated *in vacuo*. The residue was purified by flash column chromatography on silica gel (1% EtOAc in hexanes) to give **54** (0.16 g, 71%) as a colorless viscous oil:  **$^1H$  NMR** (300 MHz,  $CD_2Cl_2$ )  $\delta$  7.52 – 7.43 (m, 2H), 7.37 – 7.27 (m, 3H), 5.09 (t,  $J = 6.9$  Hz, 1H), 2.49 – 2.37 (m, 2H), 2.29 – 2.22 (m, 2H), 1.80 (t,  $J = 2.5$  Hz, 3H), 1.08 (d,  $J = 4.3$  Hz, 18H), 1.03 (m, 3H);  **$^{13}C$  NMR** (151 MHz,  $CD_2Cl_2$ )  $\delta$  150.9, 140.1, 127.8, 127.5, 126.0, 109.5, 78.7, 75.4, 25.9, 18.9, 17.6, 13.5, 3.1; **HRMS** (EI) calc for  $[C_{22}H_{34}OSi]^+$  ( $[M]^+$ ):  $m/z$  342.2379, found 342.2377.

<sup>5</sup> Kamijo, S.; Dudley, G. B. *J. Am. Chem. Soc.* **2006**, *128*, 6499.

### Synthesis of substrate **56**

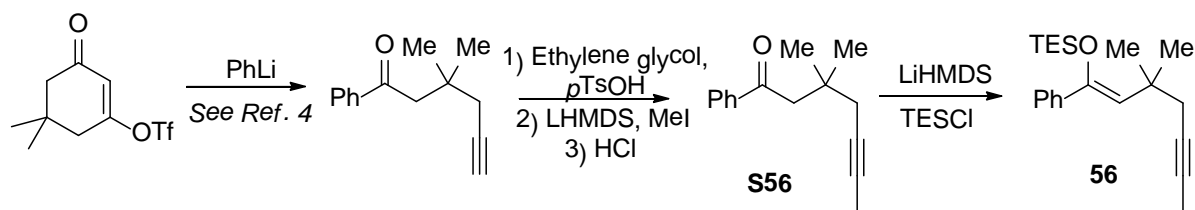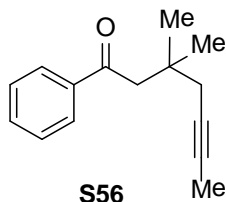

**3,3-dimethyl-1-phenylhept-5-yn-1-one (S56):** To a stirred solution of ketone<sup>5</sup> (1.20 g, 7.5 mmol) in dry benzene (50 mL) were added ethylene glycol (0.63 mL, 11.3 mmol, 1.5 equiv.) and a catalytic amount of *p*TsOH. The mixture was refluxed overnight using a Dean-Stark apparatus. Then, the reaction cooled to rt and poured into a sat. solution of NaHCO<sub>3</sub>. The mixture was extracted with Et<sub>2</sub>O (3×), and the combined organic layers were washed with brine, dried over MgSO<sub>4</sub>, filtered, and concentrated under vacuum.

The crude acetal (7.5 mmol, 1 equiv.) was dissolved in THF (15 mL, 0.5 M) and cooled to -78 °C. A solution of LiHMDS (7.5 mL, 1.0 M in THF, 1 equiv.) was slowly added. The resulting solution was stirred for 1 h and methyl iodide (0.60 mL, 9.4 mmol, 1.25 equiv.) was slowly added, then the solution was stirred overnight with temperature rising to rt. The reaction mixture was quenched with a sat. solution of NH<sub>4</sub>Cl and extracted with Et<sub>2</sub>O (3×). The organic layer was collected, washed with brine, dried with MgSO<sub>4</sub> and concentrated under vacuum.

The crude alkylated product (7.5 mmol, 1 equiv.) was dissolved in THF (15 mL) and a solution of HCl (5 %, 10 mL) was slowly added. The resulting solution was stirred for 4 h and the reaction mixture was quenched with a sat. solution of NaHCO<sub>3</sub> and extracted with EtOAc (3×). The organic layer was collected, washed with brine, dried with MgSO<sub>4</sub> and concentrated under vacuum. The product was purified by flash column chromatography on silica gel (7% EtOAc in hexanes) to give **S56** (1.09 g, 68% over three steps) as a pale yellow viscous oil: **1H NMR** (400 MHz, CDCl<sub>3</sub>) δ 8.01 – 7.95 (m, 2H), 7.56 (t, *J* = 7.3 Hz, 1H), 7.46 (t, *J* = 7.6 Hz, 2H), 3.01 (s, 2H), 2.29 (dd, *J* = 4.9, 2.4 Hz, 2H), 1.80 (t, *J* = 2.5 Hz, 3H), 1.14 (s, 6H); **13C**

**NMR** (151 MHz, CDCl<sub>3</sub>)  $\delta$  200.0, 138.5, 132.7, 128.5, 128.1, 77.7, 63.7, 47.1, 34.2, 32.5, 27.4, 3.5; **HRMS** (EI) calc for [C<sub>15</sub>H<sub>18</sub>O]<sup>+</sup> ([M]<sup>+</sup>): *m/z* 214.1358, found 214.1348.

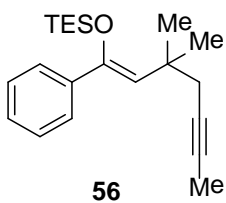

**(Z)-(3,3-dimethyl-1-phenylhept-1-en-5-ynoxy)triethylsilane**

**(56)**: A solution of KHMDS (1.5 equiv.) in THF (0.5 M) was cooled to -78 °C and stirred for 10 min. Ketone **S56** (1 equiv.) in THF (0.5 M) was slowly added. The resulting solution was stirred for 2 h. TESCO (1.2 equiv.) in THF (0.5 M) was slowly added, then the solution was stirred overnight with temperature raising to rt, quenched with sat. NH<sub>4</sub>Cl, extracted with Et<sub>2</sub>O. The organic layer was collected, washed with brine, dried with MgSO<sub>4</sub>, concentrated under vacuum. The residue was purified by flash column chromatography on silica gel (1% Et<sub>3</sub>N in pentane) to give **56** (0.041 g, 71%) as a colorless viscous oil: <sup>1</sup>H NMR (300 MHz, CD<sub>2</sub>Cl<sub>2</sub>)  $\delta$  7.43 – 7.22 (m, 5H), 4.73 (s, 1H), 2.31 (q, *J* = 2.4 Hz, 2H), 1.79 (t, *J* = 2.5 Hz, 3H), 1.26 (s, 6H), 0.91 (t, *J* = 7.9 Hz, 9H), 0.55 (q, *J* = 7.9 Hz, 6H); <sup>13</sup>C NMR (151 MHz, CDCl<sub>3</sub>)  $\delta$  150.1, 141.4, 127.8, 127.5, 127.1, 118.5, 77.7, 76.6, 35.0, 33.0, 27.6, 6.7, 5.6, 3.6; **HRMS** (EI) calc for [C<sub>21</sub>H<sub>32</sub>OSi]<sup>+</sup> ([M]<sup>+</sup>): *m/z* 328.2222, found 328.2213.

## VI. Gold(I) cyclizations for Silyloxy-1,5-enynes

**General Procedure F - Gold(I) cyclizations:** (*R*)-DTBM-SEGP<sub>2</sub>OSi(AuCl)<sub>2</sub> (2.9 mg, 3.5  $\mu$ mol) and NaBARF (3.1 mg, 7.0  $\mu$ mol) was dissolved in CH<sub>2</sub>Cl<sub>2</sub> and stir for 15 minutes at room temperature. The mixture was cooled at -50 °C and a solution of the corresponding enolsilane (35  $\mu$ mol) in CD<sub>2</sub>Cl<sub>2</sub> was transferred to the catalyst mixture. The solution was stirred at the specified temperature until consumption of the starting material as indicated by TLC (1 to 14 hours). The solution was concentrated and purified on silica gel.

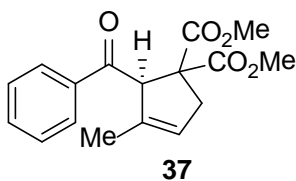

**(R)-dimethyl-2-benzoyl-3-methylcyclopent-3-ene-1,1-dicarboxylate (37):** According to the general procedure F, enolsilane **36** (16 mg, 0.035 mmol) was reacted under the standard conditions. The product was purified by flash column chromatography on silica gel (11% EtOAc in hexanes) to give **37** (8.0 mg, 75%) as a colorless viscous oil: **<sup>1</sup>H NMR** (400 MHz, CDCl<sub>3</sub>) δ 8.12 – 8.04 (m, 2H), 7.64 (t, *J* = 7.4 Hz, 1H), 7.53 (t, *J* = 7.6 Hz, 2H), 5.54 (d, *J* = 0.9 Hz, 1H), 5.34 (s, 1H), 3.82 (s, 3H), 3.58 (ddd, *J* = 16.9, 4.6, 2.3 Hz, 1H), 3.50 (s, 3H), 2.89 (dt, *J* = 16.9, 1.9 Hz, 1H), 1.69 – 1.58 (m, 3H); **<sup>13</sup>C NMR** (101 MHz, CDCl<sub>3</sub>) δ 200.4, 172.0, 169.7, 138.0, 137.6, 133.4, 128.71, 128.70, 125.9, 64.7, 61.0, 53.3, 52.4, 40.1, 16.2; **HRMS** (ESI) calc for [C<sub>17</sub>H<sub>18</sub>O<sub>5</sub>Na]<sup>+</sup> ([M+Na]<sup>+</sup>): *m/z* 325.1046, found 325.1046; **HPLC**: enantiomeric excess determined by HPLC with a Chiralpak IC column (99:1 hexanes : Butanol, 0.8 ml/min, 237 nm); major enantiomer *t<sub>r</sub>* = 14.1 min, minor enantiomer *t<sub>r</sub>* = 16.9 min; 94% ee; absolute configuration was assigned by analogy to the x-ray analysis of **47**.

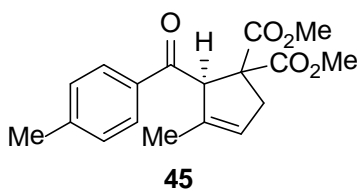

**(R)-dimethyl-3-methyl-2-(4-methylbenzoyl)cyclopent-3-ene-1,1-dicarboxylate (45):** According to the general procedure F, enolsilane **38** (17 mg, 0.035 mmol) was reacted under the standard conditions. The product was purified by flash column chromatography on silica gel (10% EtOAc in hexanes) to give **45** (8.9 mg, 81%) as a colorless viscous oil: **<sup>1</sup>H NMR** (400 MHz, CDCl<sub>3</sub>) δ 7.97 (d, *J* = 7.8 Hz, 2H), 7.32 (d, *J* = 7.8 Hz, 2H), 5.52 (s, 1H), 5.30 (s, 1H), 3.80 (s, 3H), 3.57 (d, *J* = 16.9 Hz, 1H), 3.49 (s, 3H), 2.86 (d, *J* = 16.7 Hz, 1H), 2.46 (s, 3H), 1.62 (s, 3H); **<sup>13</sup>C NMR** (101 MHz, CDCl<sub>3</sub>) δ 199.8, 172.1, 169.7, 144.3, 138.1, 135.1, 129.4, 128.9, 125.7, 64.7, 60.9, 53.2, 52.4, 40.1, 21.7, 16.2; **HRMS** (ESI) calc for [C<sub>18</sub>H<sub>21</sub>O<sub>5</sub>]<sup>+</sup> ([M+H]<sup>+</sup>): *m/z* 317.1384, found 317.1386; **HPLC**: enantiomeric excess determined by HPLC with a Chiralpak IC column (99:1 hexanes : Butanol, 0.8 ml/min, 210 nm); major enantiomer

$t_r = 14.0$  min, minor enantiomer  $t_r = 18.2$  min; 91% ee; absolute configuration was assigned by analogy to the x-ray analysis of **47**.

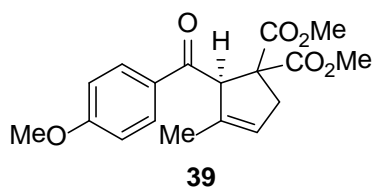

**(R)-dimethyl 2-(4-methoxybenzoyl)-3-methylcyclopent-3-ene-1,1-dicarboxylate (46):**

According to the general procedure F, enolsilane **39** (17.1 mg, 0.035 mmol) was reacted under the standard conditions. The product was purified by flash column chromatography on silica gel (15% EtOAc in hexanes) to give **46** (10.7 mg, 92%) as a colorless viscous oil: **<sup>1</sup>H NMR** (400 MHz, CDCl<sub>3</sub>)  $\delta$  8.11 – 8.05 (m, 2H), 7.03 – 6.97 (m, 2H), 5.52 (m, 1H), 5.30 (s, 1H), 3.92 (s, 3H), 3.81 (s, 3H), 3.58 (ddd,  $J = 16.9, 4.7, 2.4$  Hz, 1H), 3.50 (s, 3H), 2.87 (dt,  $J = 16.9, 1.9$  Hz, 1H), 1.69 – 1.61 (m, 3H); **<sup>13</sup>C NMR** (151 MHz, CDCl<sub>3</sub>)  $\delta$  198.5, 172.1, 170.0, 163.8, 138.1, 131.1, 130.6, 125.6, 113.8, 64.6, 60.7, 55.5, 53.2, 52.3, 40.1, 16.1; **HRMS** (ESI) calc for [C<sub>18</sub>H<sub>20</sub>O<sub>6</sub>Na]<sup>+</sup> ([M+Na]<sup>+</sup>):  $m/z$  355.1152, found 355.1152. **HPLC**: enantiomeric excess determined by HPLC with a Chiralpak IC column (99:1 hexanes : Butanol, 0.8 ml/min, 210 nm); major enantiomer  $t_r = 14.9$  min, minor enantiomer  $t_r = 19.4$  min; 94% ee; absolute configuration was assigned by analogy to the x-ray analysis of **47**.

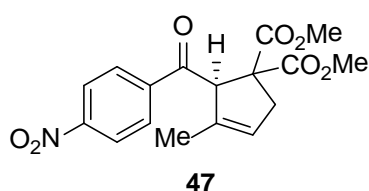

**(R)-dimethyl-3-methyl-2-(4-nitrobenzoyl)cyclopent-3-ene-1,1-dicarboxylate (47):**

According to the general procedure F, enolsilane **40** (18.1 mg, 0.035 mmol) was reacted under the standard conditions. The product was purified by flash column chromatography on silica gel (15% EtOAc in hexanes) to give **47** (9.2 mg, 71%) as a colorless viscous oil: **<sup>1</sup>H NMR** (400 MHz, CDCl<sub>3</sub>)  $\delta$  8.42 – 8.35 (m, 2H), 8.27 – 8.20 (m, 2H), 5.60 (s, 1H), 5.32 (s, 1H), 3.84 (s, 3H), 3.53 (m, 1H), 3.52 (s, 3H), 2.94 (m, 1H), 1.64 (d,  $J = 1.5$  Hz, 3H); **<sup>13</sup>C NMR** (101 MHz, CDCl<sub>3</sub>)  $\delta$  195.5, 171.6, 169.8, 137.2, 129.6, 129.2, 126.8, 123.9, 123.9, 65.1, 61.3, 53.2,

41.7, 23.9, 16.1; **HRMS** (ESI) calc for  $[C_{17}H_{17}O_7NNa]^+$  ( $[M+Na]^+$ ):  $m/z$  370.0897, found 370.0905; **HPLC**: enantiomeric excess determined by HPLC with a Chiralpak IC column (99:1 hexanes : Butanol, 0.8 ml/min, 260 nm); major enantiomer  $t_r$  = 18.1 min, minor enantiomer  $t_r$  = 26.4 min; 94% ee; absolute configuration was assigned by analogy to the x-ray analysis.

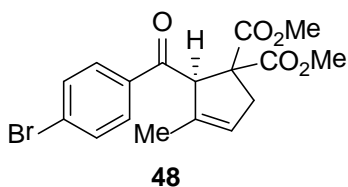

**(R)-dimethyl-2-(4-bromobenzoyl)-3-methylcyclopent-3-ene-1,1-dicarboxylate (48):**

According to the general procedure F, enolsilane **41** (19.1 mg, 0.035 mmol) was reacted under the standard conditions. The product was purified by flash column chromatography on silica gel (10% EtOAc in hexanes) to give **48** (8.9 mg, 67%) as a pale yellow viscous oil:  $^1H$  NMR (400 MHz,  $CDCl_3$ )  $\delta$  7.95 (d,  $J$  = 8.6 Hz, 2H), 7.68 (d,  $J$  = 8.5 Hz, 2H), 5.55 (s, 1H), 5.27 (s, 1H), 3.82 (s, 3H), 3.60 – 3.53 (m, 1H), 3.51 (s, 3H), 2.95 – 2.84 (m, 1H), 1.63 (s, 3H);  $^{13}C$  NMR (151 MHz,  $CDCl_3$ )  $\delta$  199.4, 171.8, 169.8, 137.7, 136.3, 132.0, 130.2, 128.7, 126.2, 64.8, 60.9, 53.3, 52.5, 40.1, 16.1; **HRMS** (ESI) calc for  $[C_{17}H_{17}O_5BrNa]^+$  ( $[M+Na]^+$ ):  $m/z$  403.0152, found 403.0161; **HPLC**: enantiomeric excess determined by HPLC with a Chiralpak IC column (99:1 hexanes : Butanol, 0.8 ml/min, 260 nm); major enantiomer  $t_r$  = 13.8 min, minor enantiomer  $t_r$  = 19.6 min; 92% ee; absolute configuration was assigned by analogy to the x-ray analysis of **47**.

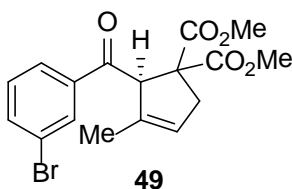

**(R)-dimethyl-2-(3-bromobenzoyl)-3-methylcyclopent-3-ene-1,1-dicarboxylate (49):**

According to the general procedure F, enolsilane **42** (19.2 mg, 0.035 mmol) was reacted under the standard conditions. The product was purified by flash column chromatography on silica gel (10% EtOAc in hexanes) to give **49** (9.7 mg, 72%) as a pale yellow viscous oil:  $^1H$  NMR

(400 MHz, CDCl<sub>3</sub>) δ 8.18 (s, 1H), 8.01 (d, *J* = 7.7 Hz, 1H), 7.75 (d, *J* = 7.9 Hz, 1H), 7.41 (t, *J* = 7.8 Hz, 1H), 5.54 (s, 1H), 5.24 (s, 1H), 3.81 (s, 3H), 3.53 (d, *J* = 16.9 Hz, 1H), 3.52 (s, 3H), 2.89 (d, *J* = 16.9 Hz, 1H), 1.63 (s, 3H); <sup>13</sup>C NMR (101 MHz, CDCl<sub>3</sub>) δ 199.1, 171.8, 169.8, 139.3, 137.6, 136.2, 131.6, 130.3, 127.3, 126.7, 123.1, 64.8, 61.0, 53.4, 52.5, 40.1, 16.1; **HRMS** (ESI) calc for [C<sub>17</sub>H<sub>17</sub>O<sub>5</sub>BrNa]<sup>+</sup> ([M+Na]<sup>+</sup>): *m/z* 403.0152, found 403.0159; **HPLC**: enantiomeric excess determined by HPLC with a Chiralpak IC column (99:1 hexanes : Butanol, 0.8 ml/min, 260 nm); major enantiomer *t<sub>r</sub>* = 11.9 min, minor enantiomer *t<sub>r</sub>* = 14.9 min; 93% ee; absolute configuration was assigned by analogy to the x-ray analysis of **47**.

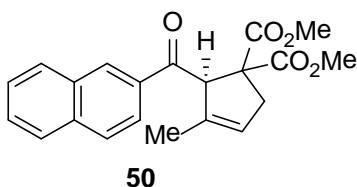

**(R)-dimethyl-2-(2-naphthoyl)-3-methylcyclopent-3-ene-1,1-dicarboxylate (50)**: According to the general procedure F, enolsilane **43** (18.5 mg, 0.035 mmol) was reacted under the standard conditions. The product was purified by flash column chromatography on silica gel (8% EtOAc in hexanes) to give **50** (10.1 mg, 82%) as a off-white solid: <sup>1</sup>H NMR (400 MHz, CDCl<sub>3</sub>) δ 8.67 (s, 1H), 8.09 (dt, *J* = 9.5, 4.8 Hz, 2H), 7.95 (t, *J* = 8.7 Hz, 2H), 7.71 – 7.58 (m, 2H), 5.57 (s, 1H), 5.52 (s, 1H), 3.85 (s, 3H), 3.64 (ddd, *J* = 17.0, 4.7, 2.4 Hz, 1H), 3.49 (s, 3H), 2.92 (d, *J* = 16.9 Hz, 1H), 1.67 (d, *J* = 1.4 Hz, 3H); <sup>13</sup>C NMR (151 MHz, CDCl<sub>3</sub>) δ 200.2, 172.1, 167.0, 138.1, 135.7, 134.9, 132.6, 130.7, 129.8, 128.7, 128.6, 127.8, 126.9, 125.9, 124.2, 64.8, 61.1, 53.3, 52.4, 40.2, 16.2; **HRMS** (ESI) calc for [C<sub>21</sub>H<sub>20</sub>O<sub>5</sub>Na]<sup>+</sup> ([M+Na]<sup>+</sup>): *m/z* 375.1203, found 375.1202; **HPLC**: enantiomeric excess determined by HPLC with a Chiralpak IC column (99.5:0.5 hexanes : Butanol, 0.8 ml/min, 237 nm); major enantiomer *t<sub>r</sub>* = 14.1 min, minor enantiomer *t<sub>r</sub>* = 18.2 min; 89% ee; absolute configuration was assigned by analogy to the x-ray analysis of **47**.

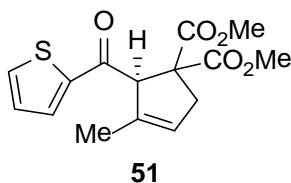

**(R)-dimethyl-3-methyl-2-(thiophene-2-carbonyl)cyclopent-3-ene-1,1-dicarboxylate (51):**

According to the general procedure F, enolsilane **44** (16.3 mg, 0.035 mmol) was reacted under the standard conditions. The product was purified by flash column chromatography on silica gel (12% EtOAc in hexanes) to give **51** (10.1 mg, 94%) as a brown solid: **<sup>1</sup>H NMR** (400 MHz, CDCl<sub>3</sub>) δ 7.96 (dd, *J* = 3.8, 0.9 Hz, 1H), 7.74 (dd, *J* = 4.9, 1.0 Hz, 1H), 7.22 (dd, *J* = 4.9, 3.9 Hz, 1H), 5.56 (s, 1H), 5.12 (s, 1H), 3.81 (s, 3H), 3.62 – 3.57 (m, 1H), 3.55 (s, 3H), 2.93 – 2.80 (m, 1H), 1.71 (d, *J* = 1.5 Hz, 3H); **<sup>13</sup>C NMR** (151 MHz, CDCl<sub>3</sub>) δ 192.4, 171.9, 169.7, 144.8, 137.6, 134.8, 133.2, 128.4, 126.1, 64.6, 62.6, 53.3, 52.5, 40.2, 16.1; **HRMS** (ESI) calc for [C<sub>15</sub>H<sub>16</sub>O<sub>5</sub>SNa]<sup>+</sup> ([M+Na]<sup>+</sup>): *m/z* 331.0611, found 331.0611; **HPLC**: enantiomeric excess determined by HPLC with a Chiralpak IC column (98:2 hexanes : Butanol, 0.8 ml/min, 237 nm); major enantiomer *t<sub>r</sub>* = 14.1 min, minor enantiomer *t<sub>r</sub>* = 16.9 min; 90% ee; absolute configuration was assigned by analogy to the x-ray analysis of **47**.

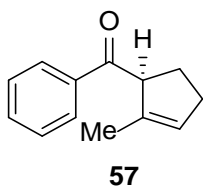

**(S)-(2-methylcyclopent-2-enyl)(phenyl)methanone (57):**

According to the general procedure F, enolsilane **54** (17.1 mg, 0.05 mmol) was reacted under the standard conditions. The product was purified by flash column chromatography on silica gel (2% EtOAc in hexanes) to give **57** (7.2 mg, 77%) as a colorless viscous oil: **<sup>1</sup>H NMR** (400 MHz, CDCl<sub>3</sub>) δ 8.06 – 8.04 (m, 2H), 7.65 – 7.57 (m, 1H), 7.52 (t, *J* = 7.5 Hz, 2H), 5.70 – 5.63 (m, 1H), 4.44 – 4.39 (m, 1H), 2.57 – 2.46 (m, 1H), 2.45 – 2.34 (m, 2H), 2.20 – 2.06 (m, 1H), 1.74 (s, 3H); **<sup>13</sup>C NMR** (151 MHz, CDCl<sub>3</sub>) δ 196.5, 164.5, 140.6, 135.5, 134.3, 129.2, 129.1, 33.9, 29.7, 28.2, 9.6; **HRMS** (EI) calc for [C<sub>13</sub>H<sub>14</sub>O]<sup>+</sup> ([M]<sup>+</sup>): *m/z* 186.1045, found 186.1040; **HPLC**: enantiomeric excess determined by HPLC with a Chiralpak IC column (99.9:0.1 hexanes : Butanol, 0.8



ml/min, 237 nm); major enantiomer  $t_r = 8.6$  min, minor enantiomer  $t_r = 9.9$  min; 55% ee; absolute configuration was assigned by analogy to the x-ray analysis of **47**.

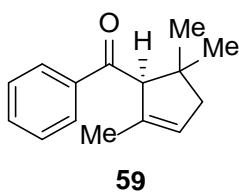

**(S)-phenyl(2,5,5-trimethylcyclopent-2-enyl)methanone (59):** According to the general procedure F, enolsilane **56** (11.5 mg, 0.035 mmol) was reacted under the standard conditions. The product was purified by flash column chromatography on silica gel (1% EtOAc in hexanes) to give **59** (6.1 mg, 81%) as a colorless viscous oil:  $^1\text{H NMR}$  (600 MHz,  $\text{CDCl}_3$ )  $\delta$  8.00 (d,  $J = 7.4$  Hz, 2H), 7.60 (t,  $J = 7.4$  Hz, 1H), 7.51 (t,  $J = 7.7$  Hz, 2H), 5.60 (s, 1H), 4.12 (s, 1H), 2.39 (ddd,  $J = 15.8, 4.2, 2.1$  Hz, 1H), 2.18 (d,  $J = 15.8$  Hz, 1H), 1.68 (s, 3H), 1.30 (s, 3H), 0.92 (s, 3H);  $^{13}\text{C NMR}$  (151 MHz,  $\text{CDCl}_3$ )  $\delta$  201.5, 138.3, 132.8, 128.6, 128.5, 127.2, 65.6, 48.2, 43.7, 31.6, 25.8, 16.3; **HRMS** (EI) calc for  $[\text{C}_{15}\text{H}_{18}\text{O}]^+$  ( $[\text{M}]^+$ ):  $m/z$  214.1358, found 214.1358; **HPLC**: enantiomeric excess determined by HPLC with a Chiralpak IC column (99.9:0.1 hexanes : Butanol, 0.8 ml/min, 210 nm); major enantiomer  $t_r = 7.9$  min, minor enantiomer  $t_r = 11.1$  min; 90% ee; absolute configuration was assigned by analogy to the x-ray analysis of **47**.

## VII. Synthesis of Silyloxy-1,3-dien-7-yne

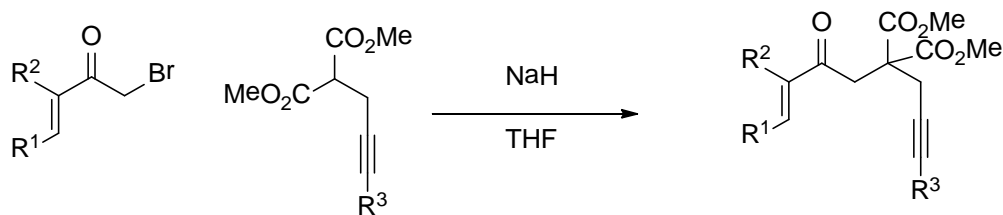

**General Procedure G - Preparation of  $\alpha,\beta$ -unsaturated ketones:** The appropriate alkyne (the ethyl substituted alkyne was used for **63**) was dissolved in THF (0.4 M) and cooled to 0 °C. Then, NaH (60 % in oil, 1.1 equiv.) was added in one portion. The reaction mixture was stirred for 30 min. at this temperature. The corresponding 2-bromo- $\alpha,\beta$ -unsaturated ketone

was dissolved in THF (0.5 M) and transferred slowly to the reaction mixture. The reaction was warmed to room temperature and quenched by the addition of an equal volume of sat. aq.  $\text{NH}_4\text{Cl}$ . The mixture was extracted with EtOAc (3  $\times$ ), and the combined organic layers were washed with brine, dried over  $\text{MgSO}_4$ , filtered, and concentrated *in vacuo*. The residue was purified by flash column chromatography to provide analytically pure compound.

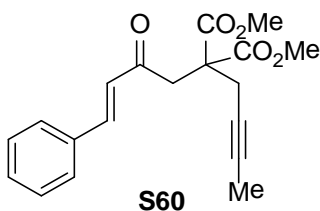

**(E)-dimethyl-2-(but-2-ynyl)-2-(2-oxo-4-phenylbut-3-enyl)malonate (S60):** According to the general procedure G, the corresponding 2-bromo- $\alpha,\beta$ -unsaturated ketone (1.13 g, 5 mmol) was reacted under the standard conditions. The product was purified by flash column chromatography on silica gel (15% EtOAc in hexanes) to give **S60** (971 mg, 63%) as a white powder:  $^1\text{H NMR}$  (400 MHz,  $\text{CDCl}_3$ )  $\delta$  7.62 (d,  $J = 16.3$  Hz, 1H), 7.58- 7.54 (m, 2H), 7.42- 7.40 (m, 3H), 6.74 (d,  $J = 16.2$  Hz, 1H), 3.76 (s, 6H), 3.59 (s, 2H), 2.99 (d,  $J = 2.5$  Hz, 2H), 1.75 (t,  $J = 2.5$  Hz, 3H);  $^{13}\text{C NMR}$  (101 MHz,  $\text{CDCl}_3$ )  $\delta$  196.6, 170.0, 143.3, 134.3, 130.6, 129.0, 128.3, 125.8, 79.2, 73.7, 54.9, 53.0, 42.9, 23.8, 3.5; **HRMS** (ESI) calc for  $[\text{C}_{19}\text{H}_{21}\text{O}_5]^+$  ( $[\text{M}+\text{H}]^+$ ):  $m/z$  329.1384, found 329.1382. The spectral data was in accordance with the literature.<sup>6</sup>

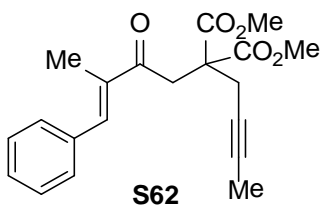

**(E)-dimethyl-2-(but-2-ynyl)-2-(3-methyl-2-oxo-4-phenylbut-3-enyl)malonate (S62):** According to the general procedure G, the corresponding 2-bromo- $\alpha,\beta$ -unsaturated ketone (1.23 g, 5.1 mmol) was reacted under the standard conditions. The product was purified by flash column chromatography on silica gel (15% EtOAc in hexanes) to give **S62** (995 mg,

<sup>6</sup> Kusama, H.; Yamabe, H.; Onizawa, Y.; Hoshino, T.; Iwasawa, N. *Angew. Chem. Int. Ed.* **2005**, *44*, 468.

57%) as a colorless viscous oil:  $^1\text{H NMR}$  (400 MHz,  $\text{CDCl}_3$ )  $\delta$  7.70 (s, 1H), 7.50-7.40 (m, 5H), 3.81 (s, 6H), 3.78 (s, 2H), 3.03 (q,  $J = 2.5$  Hz, 2H), 2.10 (s, 3H), 1.79 (t,  $J = 2.5$  Hz, 3H);  $^{13}\text{C NMR}$  (101 MHz,  $\text{CDCl}_3$ )  $\delta$  198.9, 170.3, 139.5, 137.0, 135.8, 129.8, 128.7, 128.5, 79.3, 13.9, 55.2, 53.0, 40.3, 23.8, 13.0, 3.6; **HRMS** (ESI) calc for  $[\text{C}_{20}\text{H}_{23}\text{O}_5]^+$  ( $[\text{M}+\text{H}]^+$ ):  $m/z$  343.1540, found 343.1536.

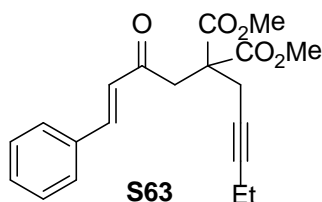

**(E)-dimethyl-2-(2-oxo-4-phenylbut-3-enyl)-2-(pent-2-ynyl)malonate (S63):** According to the general procedure G, the corresponding 2-bromo- $\alpha,\beta$ -unsaturated ketone (788 mg, 3.5 mmol) was reacted under the standard conditions. The product was purified by flash column chromatography on silica gel (10% EtOAc in hexanes) to give **S63** (622 g, 52%) as a colorless viscous oil:  $^1\text{H NMR}$  (600 MHz,  $\text{CDCl}_3$ )  $\delta$  7.65 (d,  $J = 16.2$  Hz, 1H), 7.59-7.57 (m, 2H), 7.44-7.42 (m, 3H), 6.77 (d,  $J = 16.2$  Hz, 1H), 3.79 (s, 6H), 3.62 (s, 2H), 3.03 (s, 2H), 2.15 (q,  $J = 7.4$  Hz, 2H), 1.10 (t,  $J = 7.5$  Hz, 3H);  $^{13}\text{C NMR}$  (101 MHz,  $\text{CDCl}_3$ )  $\delta$  196.6, 170.0, 143.3, 134.3, 130.6, 129.0, 128.3, 125.9, 85.4, 74.0, 55.0, 52.9, 42.8, 23.8, 14.1, 12.3; **HRMS** (ESI) calc for  $[\text{C}_{20}\text{H}_{23}\text{O}_5]^+$  ( $[\text{M}+\text{H}]^+$ ):  $m/z$  343.1540, found 343.1540.

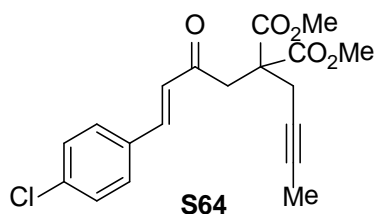

**(E)-dimethyl-2-(but-2-ynyl)-2-(4-(4-chlorophenyl)-2-oxobut-3-enyl)malonate (S64):** According to the general procedure G, the corresponding 2-bromo- $\alpha,\beta$ -unsaturated ketone (464 mg, 1.79 mmol) was reacted under the standard conditions. The product was purified by flash column chromatography on silica gel (15% EtOAc in hexanes) to give **S64** (381 mg, 61%) as a white powder:  $^1\text{H NMR}$  (400 MHz,  $\text{CDCl}_3$ )  $\delta$  7.59 (d,  $J = 16.2$  Hz, 1H), 7.52 (d,  $J = 8.3$  Hz, 2H), 7.41 (d,  $J = 8.3$  Hz, 1H), 6.74 (d,  $J = 16.2$  Hz, 1H), 3.79 (s, 6H), 3.60 (s, 2H),

3.02 (s, 2H), 1.78 (s, 3H);  $^{13}\text{C}$  NMR (151 MHz,  $\text{CDCl}_3$ ) 196.4, 170.0, 141.8, 136.6, 132.8, 129.5, 129.3, 126.2, 79.3, 73.7, 54.9, 53.0, 43.1, 23.8, 3.5; HRMS (ESI) calc for  $[\text{C}_{19}\text{H}_{20}\text{O}_5\text{Cl}]^+$  ( $[\text{M}+\text{H}]^+$ ):  $m/z$  363.0994, found 363.0999.

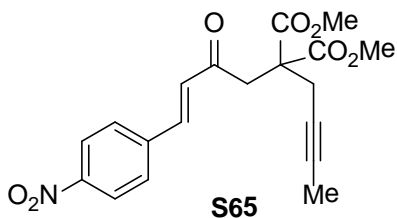

**(E)-dimethyl-2-(but-2-ynyl)-2-(4-(4-nitrophenyl)-2-oxobut-3-enyl)malonate (S65):**

According to the general procedure G, the corresponding 2-bromo- $\alpha,\beta$ -unsaturated ketone (245 mg, 0.91 mmol) was reacted under the standard conditions. The product was purified by flash column chromatography on silica gel (20% EtOAc in hexanes) to give **S65** (167 mg, 49%) as a white powder:  $^1\text{H}$  NMR (400 MHz,  $\text{CDCl}_3$ )  $\delta$  8.29 (d,  $J = 8.8$  Hz, 2H), 7.73 (d,  $J = 8.8$  Hz, 2H), 7.65 (d,  $J = 16.2$  Hz, 1H), 6.87 (d,  $J = 16.2$  Hz, 1H), 3.79 (s, 6H), 3.61 (s, 2H), 3.02 (q,  $J = 2.5$  Hz, 2H), 1.77 (t,  $J = 2.5$  Hz, 3H);  $^{13}\text{C}$  NMR (151 MHz,  $\text{CDCl}_3$ )  $\delta$  196.2, 169.9, 148.7, 140.5, 140.0, 129.2, 128.9, 124.2, 79.5, 73.6, 54.9, 53.1, 43.6, 23.9, 3.5; HRMS (ESI) calc for  $[\text{C}_{19}\text{H}_{19}\text{NO}_7\text{Na}]^+$  ( $[\text{M}+\text{Na}]^+$ ):  $m/z$  396.1054, found 396.1052.

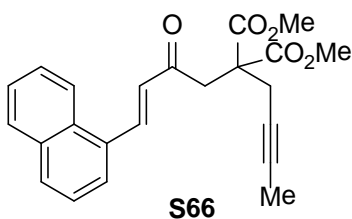

**(E)-dimethyl-2-(but-2-ynyl)-2-(4-(naphthalen-1-yl)-2-oxobut-3-enyl)malonate (S66):**

According to the general procedure G, the corresponding 2-bromo- $\alpha,\beta$ -unsaturated ketone (825 mg, 3 mmol) was reacted under the standard conditions. The product was purified by flash column chromatography on silica gel (10% EtOAc in hexanes) to give **S66** (765 mg, 68%) as a white powder:  $^1\text{H}$  NMR (600 MHz,  $\text{CDCl}_3$ )  $\delta$  8.51 (d,  $J = 15.8$  Hz, 1H), 8.24 (d,  $J = 8.4$  Hz, 1H), 7.96 (d,  $J = 8.1$  Hz, 1H), 7.92 (d,  $J = 8.0$  Hz, 1H), 7.84 (d,  $J = 7.1$  Hz, 1H), 7.67 – 7.50 (m, 3H), 6.89 (d,  $J = 15.9$  Hz, 1H), 3.82 (s, 6H), 3.69 (s, 2H), 3.06 (s, 2H), 1.79 (s, 3H);  $^{13}\text{C}$  NMR (101 MHz,  $\text{CDCl}_3$ )  $\delta$  196.5, 170.1, 140.0, 133.7, 131.6, 131.5, 130.9, 128.8,

128.1, 127.0, 126.3, 125.5, 125.2, 123.2, 79.4, 73.9, 55.0, 53.1, 43.4, 23.9, 3.6; **HRMS** (ESI) calc for  $[C_{23}H_{23}O_5]^+$  ( $[M+H]^+$ ):  $m/z$  379.1540, found 379.1543.

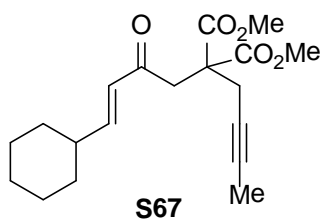

**(E)-dimethyl-2-(but-2-ynyl)-2-(4-cyclohexyl-2-oxobut-3-enyl)malonate (S67):** According to the general procedure G, the corresponding 2-bromo- $\alpha,\beta$ -unsaturated ketone (1.0 g, 4.3 mmol) was reacted under the standard conditions. The product was purified by flash column chromatography on silica gel (8/1/1 hexanes/ $CHCl_3$ / $Et_2O$ ) to give **S67** (661 mg, 46%) as a colorless viscous oil:  $^1H$  NMR  $\delta$  6.89 (dd,  $J = 16.1, 6.8$  Hz, 1H), 6.08 (dd,  $J = 16.1, 1.3$  Hz, 1H), 3.78 (s, 6H), 3.49 (s, 2H), 2.98 (d,  $J = 2.5$  Hz, 2H), 2.27 – 2.09 (m, 1H), 1.85 – 1.73 (m, 2H), 1.42 – 1.08 (m, 8H);  $^{13}C$  NMR (151 MHz,  $CDCl_3$ )  $\delta$  197.3, 170.1, 170.0, 153.4, 149.6, 128.7, 127.6, 82.7, 79.1, 73.8, 54.9, 52.9, 42.7, 42.2, 40.7, 32.6, 31.7, 25.9, 25.7, 25.3, 23.7, 21.4, 3.5; **HRMS** (ESI) calc for  $[C_{19}H_{27}O_5Na]^+$  ( $[M+H]^+$ ):  $m/z$  335.1583, found 335.1581.

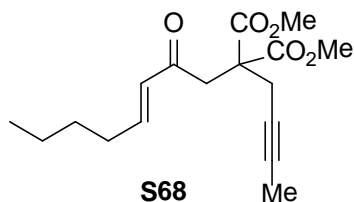

**(E)-dimethyl-2-(but-2-ynyl)-2-(2-oxooct-3-enyl)malonate (S68):** According to the general procedure G, the corresponding 2-bromo- $\alpha,\beta$ -unsaturated ketone (762 mg, 3.72 mmol) was reacted under the standard conditions. The product was purified by flash column chromatography on silica gel (10%  $EtOAc$  in hexanes) to give **S68** (698 mg, 61%) as a colorless oil:  $^1H$  NMR (400 MHz,  $CDCl_3$ )  $\delta$  6.94 (dt,  $J = 15.7, 6.9$  Hz, 1H), 6.09 (t,  $J = 14.0$  Hz, 1H), 3.75 (s, 6H), 3.46 (s, 2H), 2.93 (s, 2H), 2.25 (q,  $J = 6.8$  Hz, 2H), 1.76 (s, 3H), 1.55 – 1.42 (m, 2H), 1.42 – 1.31 (m, 2H), 0.90 (dt,  $J = 8.6, 6.7$  Hz, 3H);  $^{13}C$  NMR (101 MHz,  $CDCl_3$ )  $\delta$  196.8, 170.1, 148.7, 129.9, 79.1, 73.7, 54.7, 53.0, 42.2, 32.2, 30.1, 23.7, 22.3, 13.8, 3.5; **HRMS** (ESI) calc for  $[C_{17}H_{25}O_5]^+$  ( $[M+H]^+$ ):  $m/z$  309.1697, found 309.1696.

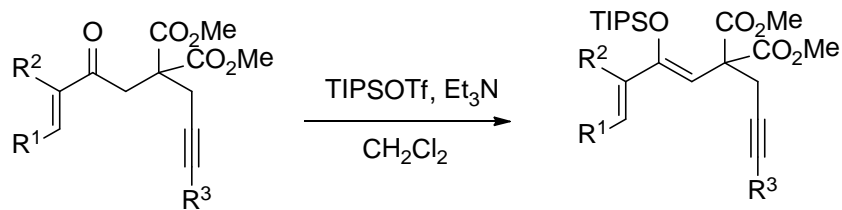

**General Procedure H - Preparation of the enolsilanes:** The appropriate ketone (1.0 equiv) was dissolved in  $\text{CH}_2\text{Cl}_2$  (0.2 M) and  $\text{Et}_3\text{N}$  (2.0 equiv) was added at room temperature. TIPSOTf (1.25 equiv) was added and the reaction mixture was stirred overnight. Then, the reaction was quenched with brine and extracted with ethyl acetate (3x). The combined organic layer was dried over  $\text{MgSO}_4$ , filtered, and concentrated *in vacuo*. The residue was purified by flash column chromatography to provide analytically pure compound.

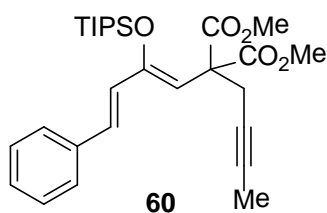

**Dimethyl-2-(but-2-ynyl)-2-((1Z,3E)-4-phenyl-2-(triisopropylsilyloxy)buta-1,3-dienyl)malonate (60):** According to the general procedure H, ketone **S60** (0.93 g, 2.93 mmol) was reacted under the standard conditions. The product was purified by flash column chromatography on silica gel (5% EtOAc in hexanes) to give **60** (1.10 g, 77%) as a white powder:  $^1\text{H NMR}$  (400 MHz,  $\text{CDCl}_3$ )  $\delta$  7.43-7.27 (m, 5H), 6.97 (d,  $J = 15.8$  Hz, 1H), 6.49 (d,  $J = 15.7$  Hz, 1H), 5.70 (s, 1H), 3.79 (s, 6H), 3.15 (d,  $J = 2.5$  Hz, 2H), 1.79 (t,  $J = 2.4$  Hz, 2H), 1.24-1.09 (m, 21H);  $^{13}\text{C NMR}$  (101 MHz,  $\text{CDCl}_3$ )  $\delta$  170.1, 151.3, 136.5, 131.8, 128.7, 128.0, 126.6, 125.8, 102.7, 77.2, 74.4, 56.7, 52.8, 25.1, 18.0, 13.8, 3.6; **HRMS** (ESI) calc for  $[\text{C}_{28}\text{H}_{41}\text{O}_5\text{Si}]^+$  ( $[\text{M}+\text{H}]^+$ ):  $m/z$  485.2718, found 485.2706. The spectral data was in accordance with the literature.<sup>5</sup>

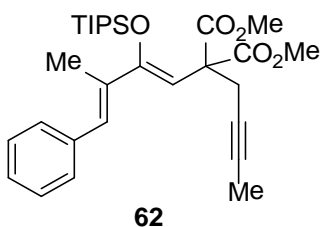

**Dimethyl-2-(but-2-ynyl)-2-((1Z,3E)-3-methyl-4-phenyl-2-(triisopropylsilyloxy)buta-1,3-dienyl)malonate (62):** According to the general procedure H, ketone **S62** (400 mg, 1.17 mmol) was reacted under the standard conditions. The product was purified by flash column chromatography on silica gel (5% EtOAc in hexanes) to give **62** (305 mg, 52%) as a colorless viscous oil:  $^1\text{H NMR}$  (400 MHz,  $\text{CDCl}_3$ )  $\delta$  7.40-7.26 (m, 5H), 6.68 (s, 1H), 5.45 (s, 1H), 3.77 (s, 6H), 3.14 (q,  $J = 2.4$  Hz, 2H), 2.08 (s, 3H), 1.76 (m,  $J = 2.4$  Hz, 3H), 1.20-1.05 (m, 21H);  $^{13}\text{C NMR}$  (101 MHz,  $\text{CDCl}_3$ )  $\delta$  170.1, 156.1, 137.3, 136.5, 129.2, 129.0, 128.7, 128.3, 126.8, 103.9, 77.8, 74.4, 56.5, 52.8, 26.2, 18.1, 17.7, 14.2, 3.5; **HRMS** (ESI) calc for  $[\text{C}_{30}\text{H}_{43}\text{O}_5\text{Si}]^+$  ( $[\text{M}+\text{H}]^+$ ):  $m/z$  499.2874, found 499.2870.

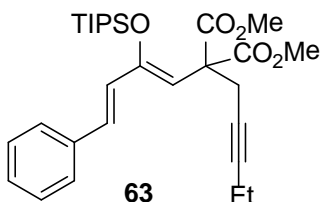

**Dimethyl-2-(pent-2-ynyl)-2-((1Z,3E)-4-phenyl-2-(triisopropylsilyloxy)buta-1,3-dienyl)malonate (63):** According to the general procedure H, ketone **S63** (303 mg, 0.88 mmol) was reacted under the standard conditions. The product was purified by flash column chromatography on silica gel (4% EtOAc in hexanes) to give **63** (316mg, 72%) as a colorless viscous oil:  $^1\text{H NMR}$  (400 MHz,  $\text{CDCl}_3$ )  $\delta$  7.43-7.30 (m, 5H), 6.97 (d,  $J = 15.8$  Hz, 1H), 6.50 (d,  $J = 15.8$  Hz, 1H), 5.75 (s, 1H), 3.79 (s, 6H), 3.17 (t,  $J = 2.3$  Hz, 2H), 2.16 (qd,  $J = 7.5, 5.2$  Hz, 2H), 1.22-1.09 (m, 21H);  $^{13}\text{C NMR}$  (101 MHz,  $\text{CDCl}_3$ )  $\delta$  170.1, 151.3, 136.5, 131.8, 128.7, 128.1, 126.6, 125.8, 102.9, 84.0, 74.8, 56.8, 52.8, 25.2, 18.0, 13.9, 12.4; **HRMS** (ESI) calc for  $[\text{C}_{29}\text{H}_{43}\text{O}_5\text{Si}]^+$  ( $[\text{M}+\text{H}]^+$ ):  $m/z$  499.2885, found 499.2873.

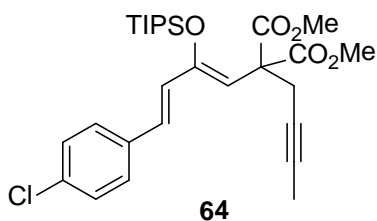

**Dimethyl-2-(but-2-ynyl)-2-((1Z,3E)-4-(4-chlorophenyl)-2-(triisopropylsilyloxy)buta-1,3-dienyl)malonate (64):** According to the general procedure H, ketone **S64** (204 mg, 0.58 mmol) was reacted under the standard conditions. The product was purified by flash column chromatography on silica gel (5% EtOAc in hexanes) to give **64** (232 mg, 77%) as a white powder:  $^1\text{H NMR}$  (400 MHz,  $\text{CDCl}_3$ )  $\delta$  7.32 (s, 4H), 6.89 (d,  $J = 15.7$  Hz, 1H), 6.43 (d,  $J = 15.8$  Hz, 1H), 5.71 (s, 1H), 3.76 (s, 6H), 3.12 (q,  $J = 2.5$  Hz, 2H), 1.76 (t,  $J = 2.4$  Hz, 3H), 1.19-1.07 (m, 21H);  $^{13}\text{C NMR}$  (151 MHz,  $\text{CDCl}_3$ )  $\delta$  170.0, 151.1, 135.0, 133.8, 130.5, 128.9, 128.1, 127.8, 126.5, 103.2, 77.8, 74.4, 56.7, 52.8, 25.1, 18.0, 17.7, 13.8, 12.7, 12.3, 3.6; **HRMS** (ESI) calc for  $[\text{C}_{28}\text{H}_{40}\text{O}_5\text{Si}]^+$  ( $[\text{M}+\text{H}]^+$ ):  $m/z$  519.2328, found 519.2326.

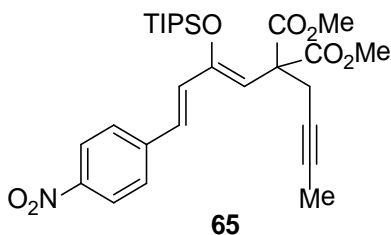

**Dimethyl-2-(but-2-ynyl)-2-((1Z,3E)-4-(4-nitrophenyl)-2-(triisopropylsilyloxy)buta-1,3-dienyl)malonate (65):** According to the general procedure H, ketone **S65** (80 mg, 0.21 mmol) was reacted under the standard conditions. The product was purified by flash column chromatography on silica gel (8% EtOAc in hexanes) to give **65** (84 mg, 76%) as a white powder:  $^1\text{H NMR}$  (400 MHz,  $\text{CDCl}_3$ )  $\delta$  8.23 (d,  $J = 8.8$  Hz, 2H), 7.52 (d,  $J = 8.8$  Hz, 2H), 6.99 (d,  $J = 15.8$  Hz, 1H), 6.63 (d,  $J = 15.8$  Hz, 1H), 5.82 (s, 1H), 3.77 (6H), 3.14 (s, 2H), 1.76 (s, 3H), 1.19-1.07 (m, 21H);  $^{13}\text{C NMR}$  (151 MHz,  $\text{CDCl}_3$ )  $\delta$  170.5, 149.8, 147.1, 143.3, 129.2, 127.4, 125.2, 124.1, 110.3, 79.2, 73.3, 56.9, 53.2, 28.5, 18.0, 12.7, 3.4; **HRMS** (ESI) calc for  $[\text{C}_{20}\text{H}_{40}\text{NO}_7\text{Si}]^+$  ( $[\text{M}+\text{H}]^+$ ):  $m/z$  530.2580, found 530.2582.



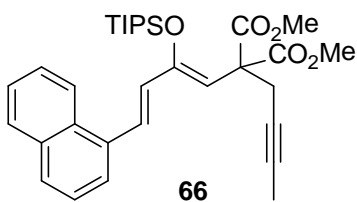

**Dimethyl-2-(but-2-ynyl)-2-((1Z,3E)-4-(naphthalen-1-yl)-2-(triisopropylsilyloxy)buta-1,3-dienyl)malonate (66):** According to the general procedure H, ketone **S66** (475 mg, 1.25 mmol) was reacted under the standard conditions. The product was purified by flash column chromatography on silica gel (4% EtOAc in hexanes) to give **66** (600 mg, 89%) as a white powder:  $^1\text{H NMR}$  (400 MHz,  $\text{CDCl}_3$ )  $\delta$  8.19 (d,  $J = 8.9$  Hz, 1H), 7.91 (d,  $J = 7.5$  Hz, 1H), 7.86 (d,  $J = 8.1$  Hz, 1H), 7.75 (d,  $J = 15.4$  Hz, 1H), 7.62-7.49 (m, 4H), 6.55 (d,  $J = 15.4$  Hz, 1H), 5.85 (s, 1H), 3.82 (s, 6H), 3.20 (s, 2H), 1.83 (s, 3H), 1.27-1.10 (m, 21H);  $^{13}\text{C NMR}$  (151 MHz,  $\text{CDCl}_3$ )  $\delta$  170.1, 151.7, 134.1, 133.7, 131.4, 129.1, 128.9, 128.6, 128.5, 126.3, 125.9, 125.6, 123.7, 103.3, 77.8, 74.5, 56.8, 52.8, 25.3, 18.0, 17.7, 13.9, 12.3, 3.6; **HRMS** (ESI) calc for  $[\text{C}_{32}\text{H}_{43}\text{O}_5\text{Si}]^+$  ( $[\text{M}+\text{H}]^+$ ):  $m/z$  535.2874, found 535.2875.

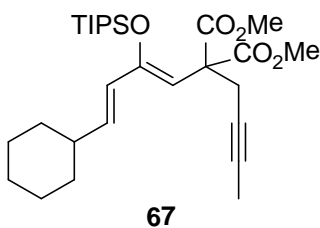

**Dimethyl-2-(but-2-ynyl)-2-((1Z,3E)-4-cyclohexyl-2-(triisopropylsilyloxy)buta-1,3-dienyl)malonate (67):** According to the general procedure H, ketone **S67** (435 mg, 1.3 mmol) was reacted under the standard conditions. The product was purified by flash column chromatography on silica gel (4% EtOAc in hexanes) to give **67** (477 mg, 75%) as a colorless viscous oil:  $^1\text{H NMR}$  (400 MHz,  $\text{CDCl}_3$ )  $\delta$  6.02 (dd,  $J = 15.4, 6.6$  Hz, 1H), 5.72 (d,  $J = 15.4$  Hz, 1H), 5.42 (s, 1H), 3.74 (s, 6H), 3.07 (d,  $J = 2.5$  Hz, 2H), 2.03-1.96 (m, 1H), 1.76-1.73 (m, 7H), 1.32-1.08 (m, 27H);  $^{13}\text{C NMR}$  (101 MHz,  $\text{CDCl}_3$ )  $\delta$  170.3, 152.0, 140.4, 124.9, 101.2, 77.5, 74.6, 56.7, 52.7, 40.6, 32.3, 26.1, 26.0, 25.2, 17.9, 13.9, 3.6; **HRMS** (ESI) calc for  $[\text{C}_{28}\text{H}_{47}\text{O}_5\text{Si}]^+$  ( $[\text{M}+\text{H}]^+$ ):  $m/z$  491.3198, found 491.3186.

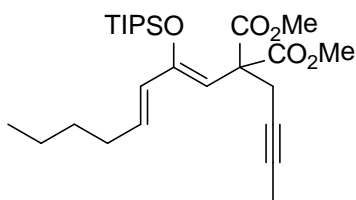

68

**Dimethyl-2-(but-2-ynyl)-2-((1Z,3E)-2-(triisopropylsilyloxy)octa-1,3-dienyl)malonate (68):**

According to the general procedure H, ketone **S68** (306 mg, 1 mmol) was reacted under the standard conditions. The product was purified by flash column chromatography on silica gel (2% EtOAc in hexanes) to give **68** (217 mg, 47%) as a colorless viscous oil:  $^1\text{H NMR}$  (400 MHz,  $\text{CDCl}_3$ )  $\delta$  6.17 – 6.03 (m, 1H), 5.79 (d,  $J = 15.2$  Hz, 1H), 5.46 (s, 1H), 3.76 (s, 6H), 3.09 (d,  $J = 2.3$  Hz, 2H), 2.12 (q,  $J = 7.1$  Hz, 3H), 1.77 (s, 3H), 1.48 – 1.23 (m, 6H), 1.22 – 1.02 (m, 21H), 0.95 (t,  $J = 7.2$  Hz, 3H);  $^{13}\text{C NMR}$  (101 MHz,  $\text{CDCl}_3$ )  $\delta$  170.3, 151.7, 135.1, 127.3, 101.8, 101.3, 98.2, 77.5, 74.6, 56.6, 52.8, 32.3, 30.9, 25.2, 22.3, 17.9, 17.7, 13.9, 13.8, 3.6; **HRMS** (ESI) calc for  $[\text{C}_{25}\text{H}_{42}\text{O}_5\text{Si}]^+$  ( $[\text{M}+\text{H}]^+$ ):  $m/z$  450.2796, found 450.2796.

### VIII. Gold cyclization with dienol silyl ether

**General Procedure I - Gold(I) cyclizations:** The (*R*)-DTBM-SEGPHOS( $\text{AuCl}$ )<sub>2</sub> (5 mol %) and NaBARF (10 mol %) was dissolved in  $\text{CH}_2\text{Cl}_2$ . Dried molecular sieves were added and the mixture was stirred for 15 minutes at room temperature. A solution of the  $\alpha,\beta$ -unsaturated enolsilane (1 equiv.) in  $\text{CH}_2\text{Cl}_2$  was transferred to the catalyst mixture. The solution was stirred at this temperature until consumption of the starting material as indicated by TLC (1 to 14 hours). The solution was diluted in  $\text{CH}_2\text{Cl}_2$  and filtered on Celite before being concentrated and purified on silica gel.

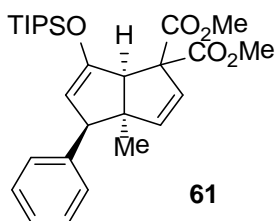

**61**

**(3aS,4R,6aR)-dimethyl-3a-methyl-4-phenyl-6-(triisopropylsilyloxy)-3a,4-**

**dihydropentalene-1,1(6aH)-dicarboxylate (61):** According to the general procedure I, dienol silyl ether **60** (24.1 mg, 0.05 mmol) was reacted under the standard conditions (1,2-dichloroethane was used as solvent). The product was purified by flash column chromatography on silica gel (5% EtOAc in hexanes) to give **61** (22 mg, 91%) as a white powder:  $^1\text{H NMR}$  (400 MHz,  $\text{CDCl}_3$ )  $\delta$  7.30 – 7.19 (m, 5H), 5.47 (d,  $J = 5.7$  Hz, 1H), 4.83 (d,  $J = 5.7$  Hz, 1H), 4.69 (s, 1H), 3.91 (s, 1H), 3.75 (s, 3H), 3.73 (s, 3H), 3.65 (s, 1H), 1.32 (s, 3H), 1.26 – 1.18 (m, 3H), 1.12 (t,  $J = 7.6$  Hz, 18H); The spectral data was in accordance with the literature<sup>5</sup>; **HRMS** (ESI) calc for  $[\text{C}_{28}\text{H}_{41}\text{O}_5\text{Si}]^+$  ( $[\text{M}+\text{H}]^+$ ):  $m/z$  485.2718, found 485.2719; **HPLC**: enantiomeric excess determined by HPLC with a Chiralpak IC column (99.9: 0.1 hexanes : Butanol, 0.8 ml/min, 218 nm); major enantiomer  $t_r = 16.7$  min, minor enantiomer  $t_r = 19.3$  min; 99% ee; absolute configuration was assigned by x-ray analysis of **76**.

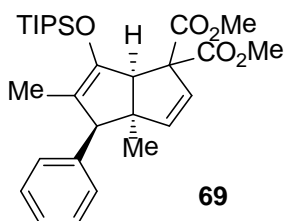

**69**

**(3aS,4R,6aR)-dimethyl-3a,5-dimethyl-4-phenyl-6-(triisopropylsilyloxy)-3a,4-**

**dihydropentalene-1,1(6aH)-dicarboxylate (69):** According to the general procedure I, dienol silyl ether **62** (24.9 mg, 0.05 mmol) was reacted under the standard conditions. The product was purified by flash column chromatography on silica gel (4% EtOAc in hexanes) to give **69** (18.9 mg, 76%) as a colorless viscous oil:  $^1\text{H NMR}$  (400 MHz,  $\text{CDCl}_3$ )  $\delta$  7.35-7.30 (m, 2H), 7.27-7.23 (m, 1H), 7.17 (d,  $J = 7.0$  Hz, 2H), 5.45 (d,  $J = 5.6$  Hz, 1H), 4.81 (d,  $J = 5.6$  Hz, 1H), 3.97 (s, 1H), 3.79 (s, 3H), 3.78 (s, 3H), 3.43 (s, 1H), 1.35 (s, 3H), 1.26 (s, 3H), 1.24-1.17 (m, 21H);  $^{13}\text{C NMR}$  (101 MHz,  $\text{CDCl}_3$ )  $\delta$   $^{13}\text{C NMR}$  (151 MHz,  $\text{CDCl}_3$ )  $\delta$  171.4, 170.7, 145.9, 142.1, 141.0, 129.6, 127.9, 126.3, 126.1, 115.6, 69.7, 62.7, 62.3, 57.1, 52.5, 28.2, 18.1, 17.9, 13.4, 11.6; **HRMS** (ESI) calc for  $[\text{C}_{29}\text{H}_{43}\text{O}_5\text{Si}]^+$  ( $[\text{M}+\text{H}]^+$ ):  $m/z$  499.2885, found 499.2883;

**HPLC:** enantiomeric excess determined by HPLC with a Chiralpak IC column (99.9:0.1 hexanes : Butanol, 0.8 ml/min, 220 nm); major enantiomer  $t_r = 10.3$  min, minor enantiomer  $t_r = 12.1$  min; 96% ee; absolute configuration was assigned by analogy with **76**.

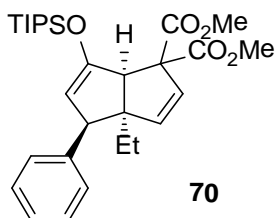

**(3a*S*,4*R*,6a*R*)-dimethyl-3a-ethyl-4-phenyl-6-(triisopropylsilyloxy)-3a,4-**

**dihydropentalene-1,1(6a*H*)-dicarboxylate (70):** According to the general procedure I, dienol silyl ether **63** (21 mg, 0.042 mmol) was reacted under the standard conditions. The product was purified by flash column chromatography on silica gel (4% EtOAc in hexanes) to give **70** (12.8 g, 61%) as a colorless viscous oil:  $^1\text{H NMR}$  (600 MHz,  $\text{CDCl}_3$ )  $\delta$  7.38 – 7.19 (m, 5H), 5.52 (d,  $J = 5.6$  Hz, 1H), 4.85 (d,  $J = 5.6$  Hz, 1H), 4.69 (s, 1H), 3.95 (s, 1H), 3.77 (s, 3H), 3.76 (s, 3H), 3.72 (s, 1H), 1.68 (q,  $J = 7.4$  Hz, 2H), 1.28 – 1.18 (m, 3H), 1.14 (t,  $J = 7.8$  Hz, 18H), 0.90 (t,  $J = 7.4$  Hz, 3H);  $^{13}\text{C NMR}$  (101 MHz,  $\text{CDCl}_3$ )  $\delta$   $^{13}\text{C NMR}$  (151 MHz,  $\text{CDCl}_3$ )  $\delta$  171.4, 170.7, 152.5, 142.6, 140.4, 129.1, 127.8, 126.9, 126.3, 107.48, 69.3, 63.0, 59.2, 55.5, 52.6, 52.5, 33.0, 18.0, 17.9, 12.5, 12.4, 9.2; **HRMS** (ESI) calc for  $[\text{C}_{29}\text{H}_{43}\text{O}_5\text{Si}]^+$  ( $[\text{M}+\text{H}]^+$ ):  $m/z$  499.2885, found 499.2877; **HPLC:** enantiomeric excess determined by HPLC with a Chiralpak IC column (99.9:0.1 hexanes : Butanol, 0.8 ml/min, 220 nm); major enantiomer  $t_r = 10.3$  min, minor enantiomer  $t_r = 12.1$  min; 96% ee; absolute configuration was assigned by analogy with **76**.

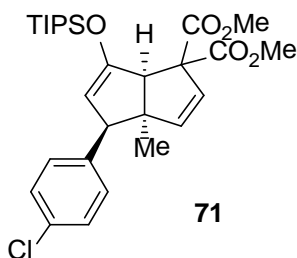

**(3a*S*,4*R*,6a*R*)-dimethyl-4-(4-chlorophenyl)-3a-methyl-6-(triisopropylsilyloxy)-3a,4-**

**dihydropentalene-1,1(6a*H*)-dicarboxylate (71):** According to the general procedure I, dienol silyl ether **64** (25.9 mg, 0.05 mmol) was reacted under the standard conditions. The product

was purified by flash column chromatography on silica gel (5% EtOAc in hexanes) to give **71** (16.6 mg, 64%) as a white powder:  $^1\text{H NMR}$  (600 MHz,  $\text{CDCl}_3$ )  $\delta$  7.28 (d,  $J = 7.8$  Hz, 2H), 7.15 (d,  $J = 7.8$  Hz, 2H), 5.50 (d,  $J = 5.5$  Hz, 1H), 4.84 (d,  $J = 5.5$  Hz, 1H), 4.65 (s, 1H), 3.92 (s, 1H), 3.76 (s, 3H), 3.75 (s, 3H), 3.63 (s, 1H), 1.34 (s, 3H), 1.25-1.21 (m, 3H), 1.15-1.12 (m, 18H);  $^{13}\text{C NMR}$  (151 MHz,  $\text{CDCl}_3$ )  $\delta$  171.2, 170.5, 152.9, 141.2, 140.8, 132.2, 129.9, 128.1, 126.5, 106.6, 68.96, 61.6, 58.4, 57.0, 52.7, 52.5, 27.4, 18.0, 17.9, 12.5; **HRMS** (ESI) calc for  $[\text{C}_{28}\text{H}_{40}\text{ClO}_5\text{Si}]^+$  ( $[\text{M}+\text{H}]^+$ ):  $m/z$  519.2340, found 519.2328; **HPLC**: enantiomeric excess determined by HPLC with a Chiralpak IC column (99.9:0.1 hexanes : Butanol, 0.8 ml/min, 212 nm); major enantiomer  $t_r = 9.4$  min, minor enantiomer  $t_r = 10.7$  min; 98% ee; absolute configuration was assigned by analogy with **76**.

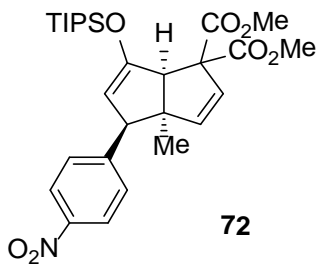

**(3a*S*,4*R*,6a*R*)-dimethyl-3a-methyl-4-(4-nitrophenyl)-6-(triisopropylsilyloxy)-3a,4-dihydropentalene-1,1(6a*H*)-dicarboxylate (72)**: According to the general procedure I, dienol silyl ether **65** (15 mg, 0.028 mmol) was reacted under the standard conditions. The product was purified by flash column chromatography on silica gel (7% EtOAc in hexanes) to give **72** (12.1 mg, 81%) as a white powder:  $^1\text{H NMR}$  (400 MHz,  $\text{CDCl}_3$ )  $\delta$  8.20 (d,  $J = 8.7$  Hz, 2H), 7.41 (d,  $J = 8.7$  Hz, 2H), 5.54 (d,  $J = 5.6$  Hz, 1H), 4.78 (d,  $J = 5.6$  Hz, 1H), 4.72 – 4.61 (m, 1H), 3.96 (s, 1H), 3.79 (s, 3H), 3.78 (s, 3H), 1.40 (s, 3H), 1.32 – 1.20 (m, 3H), 1.20 – 1.11 (m, 18H);  $^{13}\text{C NMR}$  (101 MHz,  $\text{CDCl}_3$ )  $\delta$   $^{13}\text{C NMR}$  (151 MHz,  $\text{CDCl}_3$ )  $\delta$  170.9, 170.3, 153.8, 150.4, 146.9, 140.4, 129.4, 127.3, 123.3, 105.7, 68.9, 61.8, 58.6, 57.6, 52.7, 52.6, 27.8, 17.9, 17.8, 17.7, 12.5; **HRMS** (ESI) calc for  $[\text{C}_{28}\text{H}_{40}\text{NO}_7\text{Si}]^+$  ( $[\text{M}+\text{H}]^+$ ):  $m/z$  530.2580, found 530.2569; **HPLC**: enantiomeric excess determined by HPLC with a Chiralpak IC column (99.9:0.1 hexanes : Butanol, 0.8 ml/min, 270 nm); major enantiomer  $t_r = 9.2$  min, minor enantiomer  $t_r = 9.9$  min; 89% ee; absolute configuration was assigned by analogy with **76**.

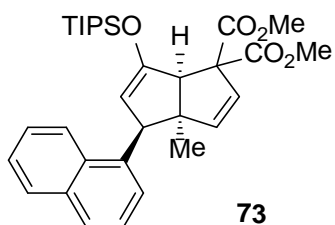

**(3a*S*,4*S*,6a*R*)-dimethyl-3a-methyl-4-(naphthalen-1-yl)-6-(triisopropylsilyloxy)-3a,4-dihydropentalene-1,1(6a*H*)-dicarboxylate (73):** According to the general procedure, dienol silyl ether **66** (26.7 mg, 0.05 mmol) was reacted under the standard conditions. The product was purified by flash column chromatography on silica gel (3% EtOAc in hexanes) to give **73** (24.2 mg, 91%) as a colorless viscous oil:  $^1\text{H NMR}$  (400 MHz,  $\text{CDCl}_3$ )  $\delta$  8.12 (d,  $J = 8.2$  Hz, 1H), 7.89 (d,  $J = 7.7$  Hz, 1H), 7.76 (d,  $J = 7.8$  Hz, 1H), 7.66 – 7.36 (m, 4H), 6.26 (d,  $J = 5.4$  Hz, 1H), 5.83 (d,  $J = 5.5$  Hz, 1H), 4.89 – 4.74 (m, 2H), 3.90 (s, 1H), 3.79 (s, 6H), 1.47 – 1.26 (m, 3H), 1.27 – 1.10 (m, 18H), 0.59 (s, 3H);  $^{13}\text{C NMR}$  (101 MHz,  $\text{CDCl}_3$ )  $\delta$  171.1, 170.5, 152.5, 143.8, 139.1, 133.8, 132.9, 128.9, 127.0, 127.0, 125.9, 125.7, 125.4, 125.2, 123.6, 107.2, 68.7, 63.3, 58.8, 52.7, 52.6, 23.4, 18.1, 17.9, 12.6; **HRMS** (ESI) calc for  $[\text{C}_{32}\text{H}_{43}\text{O}_5\text{Si}]^+$  ( $[\text{M}+\text{H}]^+$ ):  $m/z$  535.2874, found 535.2877; **HPLC**: enantiomeric excess determined by HPLC with a Chiralpak IC column (99.9:0.1 hexanes : Butanol, 0.8 ml/min, 230 nm); major enantiomer  $t_r = 16.1$  min, minor enantiomer  $t_r = 18.6$  min; 91% ee; absolute configuration was assigned by analogy with **76**.

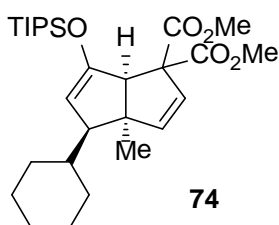

**(3a*S*,4*S*,6a*R*)-dimethyl-4-cyclohexyl-3a-methyl-6-(triisopropylsilyloxy)-3a,4-dihydropentalene-1,1(6a*H*)-dicarboxylate (74):** According to the general procedure I, dienol silyl ether **67** (17.1 g, 0.035 mmol) was reacted under the standard conditions. The product was purified by flash column chromatography on silica gel (3% EtOAc in hexanes) to give **74** (12.9 mg, 76%) as a colorless viscous oil:  $^1\text{H NMR}$  (400 MHz,  $\text{CDCl}_3$ )  $\delta$  5.92 (d,  $J = 5.6$  Hz, 1H), 5.69 (d,  $J = 5.6$  Hz, 1H), 4.70 (d,  $J = 1.6$  Hz, 1H), 3.79 – 3.71 (m, 4H), 3.70 (s, 3H), 2.10

(dd,  $J = 8.5, 1.8$  Hz, 1H), 1.96 – 1.82 (m, 1H), 1.81 – 1.66 (m, 5H), 1.39 – 1.00 (m, 27H); **HRMS** (ESI) calc for  $[C_{28}H_{47}O_5Si]^+$  ( $[M+H]^+$ ):  $m/z$  491.3198, found 491.3196; **HPLC**: enantiomeric excess determined by HPLC with a Chiralpak IC column (99.9:0.1 hexanes : Butanol, 0.8 ml/min, 210 nm); major enantiomer  $t_r = 14.0$  min, minor enantiomer  $t_r = 15.8$  min; 80% ee; absolute configuration was assigned by analogy with **76**.

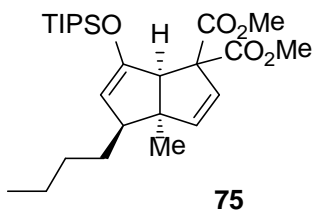

**(3a*S*,4*S*,6a*R*)-dimethyl-4-cyclohexyl-3a-methyl-6-(triisopropylsilyloxy)-3a,4-dihydropentalene-1,1(6a*H*)-dicarboxylate (75)**: According to the general procedure I, dienol silyl ether **68** (29.3 g, 0.062 mmol) was reacted under the standard conditions. The product was purified by flash column chromatography on silica gel (4% EtOAc in hexanes) to give **75** (24.0 mg, 82%) as a colorless viscous oil: **<sup>1</sup>H NMR** (400 MHz, CDCl<sub>3</sub>)  $\delta$  5.81 (d,  $J = 5.6$  Hz, 1H), 5.68 (d,  $J = 5.6$  Hz, 1H), 4.67 (s, 1H), 3.83 – 3.75 (m, 4H), 3.71 (s, 3H), 1.53 – 1.40 (m, 1H), 1.40 – 1.15 (m, 12H), 1.12 (t,  $J = 7.1$  Hz, 18H), 0.94 (t,  $J = 6.9$  Hz, 3H); **<sup>13</sup>C NMR** (101 MHz, CDCl<sub>3</sub>)  $\delta$  171.4, 170.6, 150.6, 140.9, 127.1, 107.7, 68.9, 62.3, 57.1, 52.6, 52.5, 51.6, 32.3, 31.2, 27.4, 23.1, 18.0, 17.9, 14.2, 12.5; **HRMS** (ESI) calc for  $[C_{25}H_{42}O_5Si]^+$  ( $[M+H]^+$ ):  $m/z$  450.2796, found 450.2796; **HPLC**: enantiomeric excess determined by HPLC with a Chiralpak IC column (99.9:0.1 hexanes : Butanol, 0.8 ml/min, 210 nm); major enantiomer  $t_r = 11.8$  min, minor enantiomer  $t_r = 13.4$  min; 73% ee; absolute configuration was assigned by analogy with **76**.

## IX. Synthesis of 76, 77 and 78

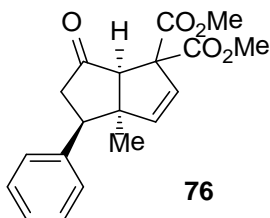

### (3a*S*,4*R*,6a*R*)-dimethyl-3a-methyl-6-oxo-4-phenyl-4,5,6,6a-

**tetrahydropentalene-1,1(3a*H*)-dicarboxylate (76):** To a cold (0 °C) solution of enolsilane **61** (13.1 mg, 0.027 mmol) in CH<sub>2</sub>Cl<sub>2</sub> (2 ml) was added with a few drops of TfOH and the reaction mixture was stirred for 2 h. Then, the reaction was quenched with sat. sol. of NaHCO<sub>3</sub> and extracted with ethyl acetate (3x). The combined organic layer was dried over MgSO<sub>4</sub>, filtered, and concentrated *in vacuo*. The residue was purified by flash column chromatography (15% EtOAc in hexanes) to provide **76** (7.4 mg, 83%) as a colorless powder. The ketone **76** was recrystallized from hexanes to give colorless crystals: <sup>1</sup>H NMR (600 MHz, CDCl<sub>3</sub>) δ 7.41-7.38 (m, 2H), 7.34-7.32 (m, 1H), 7.29-7.26 (m, 2H), 5.86 (d, *J* = 5.5 Hz, 1H), 5.51 (d, *J* = 5.5 Hz, 1H), 3.80 (s, 3H), 3.78 (s, 3H), 3.43 (s, 1H), 3.25 (dd, *J* = 14.3, 6.8 Hz, 1H), 2.78 (dd, *J* = 17.2, 14.3 Hz, 1H), 2.56 (ddd, *J* = 17.2, 6.8, 1.5 Hz, 1H), 1.30 (s, 3H); HRMS (ESI) calc for [C<sub>19</sub>H<sub>20</sub>O<sub>5</sub>Na]<sup>+</sup> ([M+Na]<sup>+</sup>): *m/z* 351.1203, found 351.1196.

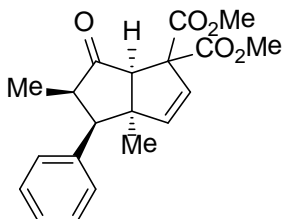

**(3a*S*,4*R*,5*R*,6a*R*)-dimethyl 3a,5-dimethyl-6-oxo-4-phenyl-4,5,6,6a-tetrahydropentalene-1,1(3a*H*)-dicarboxylate (77):** To a cold (0 °C) solution of enolsilane **69** (18.3 mg, 0.038 mmol) in CH<sub>2</sub>Cl<sub>2</sub> (2 ml) was added with a few drops of TfOH and the reaction mixture was stirred for 2 h. Then, the reaction was quenched with sat. sol. of NaHCO<sub>3</sub> and extracted with ethyl acetate (3x). The combined organic layer was dried over MgSO<sub>4</sub>, filtered, and concentrated *in vacuo*. The residue was purified by flash column chromatography (15%



EtOAc in hexanes) to provide **77** (12.1 mg, 93%) as a sticky oil:  $^1\text{H NMR}$  (400 MHz,  $\text{CDCl}_3$ )  $\delta$  7.43 – 7.27 (m, 3H), 7.25 – 7.18 (m, 2H), 5.81 (d,  $J = 5.5$  Hz, 1H), 5.51 (d,  $J = 5.5$  Hz, 1H), 3.77 (s, 3H), 3.76 (s, 3H), 3.41 (s, 1H), 2.78 – 2.67 (m, 2H), 1.25 (s, 3H), 0.94 (d,  $J = 5.5$  Hz, 3H);  $^{13}\text{C NMR}$  (126 MHz,  $\text{CDCl}_3$ )  $\delta$  216.6, 169.9, 169.6, 139.8, 137.0, 128.7, 128.6, 128.5, 127.3, 70.2, 61.3, 57.7, 57.1, 53.2, 52.9, 47.9, 24.3, 11.2; **HRMS** (ESI) calc for  $[\text{C}_{20}\text{H}_{22}\text{O}_5\text{Na}]^+$  ( $[\text{M}+\text{Na}]^+$ ):  $m/z$  365.1359, found 365.1362.

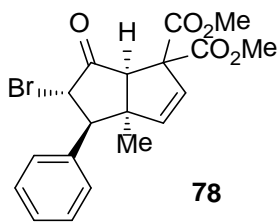

**(3aR,4R,5S,6aR)-dimethyl-5-bromo-3a-methyl-6-oxo-4-phenyl-4,5,6,6a-**

**tetrahydropentalene-1,1(3aH)-dicarboxylate (78):** To a cold ( $-78$  °C) solution of enolsilane **61** (13.9 mg, 0.025 mmol) in THF (2 ml) was added N-bromoosuccinimide and the reaction mixture was stirred at this temperature for 2 h. Then, the reaction was slowly warmed to r.t., quenched with sat. sol. of  $\text{NaHCO}_3$  and extracted with ethyl acetate (3x). The combined organic layer was dried over  $\text{MgSO}_4$ , filtered, and concentrated *in vacuo*. The residue was purified by flash column chromatography (20% EtOAc in hexanes) to provide **78** (7.5 mg, 74%) as a white powder:  $^1\text{H NMR}$  (600 MHz,  $\text{CDCl}_3$ )  $\delta$  7.48 – 7.39 (m, 2H), 7.39 – 7.31 (m, 1H), 7.24 – 7.19 (dd,  $J = 6.8, 1.7$  Hz, 2H), 5.86 (d,  $J = 5.4$  Hz, 1H), 5.53 (d,  $J = 5.6$  Hz, 1H), 4.82 (d,  $J = 13.7$  Hz, 1H), 3.76 (s, 6H), 3.57 (s, 1H), 3.30 (d,  $J = 13.6$  Hz, 1H), 1.29 (s, 3H);  $^{13}\text{C NMR}$  (151 MHz,  $\text{CDCl}_3$ )  $\delta$  206.8, 169.2, 168.9, 138.7, 134.5, 129.3, 128.6, 128.4, 127.9, 70.3, 59.5, 58.7, 58.0, 54.5, 53.3, 53.2, 24.8; **HRMS** (ESI) calc for  $[\text{C}_{19}\text{H}_{19}\text{O}_5\text{Br}]^+$  ( $[\text{M}+\text{Na}]^+$ ):  $m/z$  429.0308, found 429.0314.

## X. Crystal structures

### A) Crystallographic data for **47**

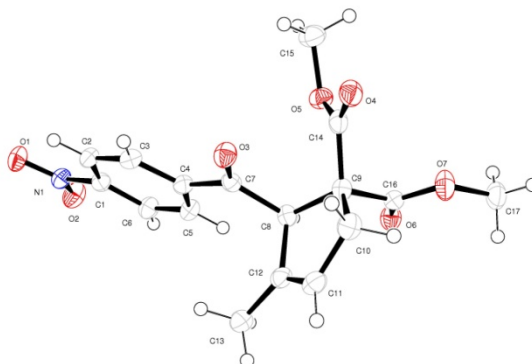

A colorless plate 0.10 x 0.08 x 0.04 mm in size was mounted on a Cryoloop with Paratone oil. Data were collected in a nitrogen gas stream at 100(2) K using phi and omega scans. Crystal-to-detector distance was 60 mm and exposure time was 5 seconds per frame using a scan width of 1.0°. Data collection was 98.8% complete to 67.00° in  $\theta$ . A total of 12448 reflections were collected covering the indices,  $-11 \leq h \leq 11$ ,  $-7 \leq k \leq 8$ ,  $-15 \leq l \leq 15$ . 2707 reflections were found to be symmetry independent, with an  $R_{\text{int}}$  of 0.0147. Indexing and unit cell refinement indicated a primitive, monoclinic lattice. The space group was found to be P2(1) (No. 4). The data were integrated using the Bruker SAINT software program and scaled using the SADABS software program. Solution by direct methods (SIR-2008) produced a complete heavy-atom phasing model consistent with the proposed structure. All non-hydrogen atoms were refined anisotropically by full-matrix least-squares (SHELXL-97). All hydrogen atoms were placed using a riding model. Their positions were constrained relative to their parent atom using the appropriate HFIX command in SHELXL-97. Absolute stereochemistry was unambiguously determined to be *R* at C8.

Table 1. Crystal data and structure refinement for toste40.

|                                   |                                                  |                  |
|-----------------------------------|--------------------------------------------------|------------------|
| X-ray ID                          | toste40                                          |                  |
| Sample/notebook ID                | JFB-03-045                                       |                  |
| Empirical formula                 | C <sub>17</sub> H <sub>17</sub> N O <sub>7</sub> |                  |
| Formula weight                    | 347.32                                           |                  |
| Temperature                       | 100(2) K                                         |                  |
| Wavelength                        | 1.54178 Å                                        |                  |
| Crystal system                    | Monoclinic                                       |                  |
| Space group                       | P2(1)                                            |                  |
| Unit cell dimensions              | a = 9.3322(8) Å                                  | α = 90°.         |
|                                   | b = 7.1038(6) Å                                  | β = 107.090(3)°. |
|                                   | c = 12.7222(11) Å                                | γ = 90°.         |
| Volume                            | 806.17(12) Å <sup>3</sup>                        |                  |
| Z                                 | 2                                                |                  |
| Density (calculated)              | 1.431 Mg/m <sup>3</sup>                          |                  |
| Absorption coefficient            | 0.953 mm <sup>-1</sup>                           |                  |
| F(000)                            | 364                                              |                  |
| Crystal size                      | 0.10 x 0.08 x 0.04 mm <sup>3</sup>               |                  |
| Crystal color/habit               | colorless plate                                  |                  |
| Theta range for data collection   | 3.63 to 67.87°.                                  |                  |
| Index ranges                      | -11 ≤ h ≤ 11, -7 ≤ k ≤ 8, -15 ≤ l ≤ 15           |                  |
| Reflections collected             | 12448                                            |                  |
| Independent reflections           | 2707 [R(int) = 0.0147]                           |                  |
| Completeness to theta = 67.00°    | 98.8 %                                           |                  |
| Absorption correction             | Semi-empirical from equivalents                  |                  |
| Max. and min. transmission        | 0.9629 and 0.9107                                |                  |
| Refinement method                 | Full-matrix least-squares on F <sup>2</sup>      |                  |
| Data / restraints / parameters    | 2707 / 1 / 229                                   |                  |
| Goodness-of-fit on F <sup>2</sup> | 1.057                                            |                  |
| Final R indices [I > 2σ(I)]       | R1 = 0.0302, wR2 = 0.0830                        |                  |
| R indices (all data)              | R1 = 0.0304, wR2 = 0.0832                        |                  |
| Absolute structure parameter      | 0.04(14)                                         |                  |
| Largest diff. peak and hole       | 0.216 and -0.160 e.Å <sup>-3</sup>               |                  |

## B) Crystallographic data for **76**

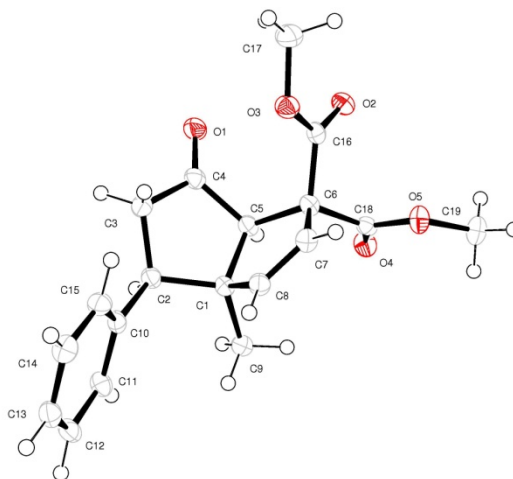

A colorless prism 0.15 x 0.10 x 0.10 mm in size was mounted on a Cryoloop with Paratone oil. Data were collected in a nitrogen gas stream at 100(2) K using phi and omega scans. Crystal-to-detector distance was 60 mm and exposure time was 5 seconds per frame using a scan width of 1.0°. Data collection was 99.8% complete to 67.00° in  $\theta$ . A total of 23485 reflections were collected covering the indices,  $-8 \leq h \leq 12$ ,  $-14 \leq k \leq 14$ ,  $-16 \leq l \leq 16$ . 3050 reflections were found to be symmetry independent, with an  $R_{\text{int}}$  of 0.0161. Indexing and unit cell refinement indicated a primitive, orthorhombic lattice. The space group was found to be  $P2(1)2(1)2(1)$  (No. 19). The data were integrated using the Bruker SAINT software program and scaled using the SADABS software program. Solution by direct methods (SIR-2008) produced a complete heavy-atom phasing model consistent with the proposed structure. All non-hydrogen atoms were refined anisotropically by full-matrix least-squares (SHELXL-97). All hydrogen atoms were placed using a riding model. Their positions were constrained relative to their parent atom using the appropriate HFIX command in SHELXL-97. Absolute stereochemistry was unambiguously determined to be *R* at C(1), C(2), and C(5), respectively.

Table 1. Crystal data and structure refinement for toste33.

|                                   |                                             |                       |
|-----------------------------------|---------------------------------------------|-----------------------|
| X-ray ID                          | toste33                                     |                       |
| Sample/notebook ID                | JFB-02-104                                  |                       |
| Empirical formula                 | C19 H20 O5                                  |                       |
| Formula weight                    | 328.35                                      |                       |
| Temperature                       | 100(2) K                                    |                       |
| Wavelength                        | 1.54178 Å                                   |                       |
| Crystal system                    | Orthorhombic                                |                       |
| Space group                       | P2(1)2(1)2(1)                               |                       |
| Unit cell dimensions              | a = 10.1287(9) Å                            | $\alpha = 90^\circ$ . |
|                                   | b = 11.8446(12) Å                           | $\beta = 90^\circ$ .  |
|                                   | c = 14.0140(14) Å                           | $\gamma = 90^\circ$ . |
| Volume                            | 1681.3(3) Å <sup>3</sup>                    |                       |
| Z                                 | 4                                           |                       |
| Density (calculated)              | 1.297 Mg/m <sup>3</sup>                     |                       |
| Absorption coefficient            | 0.771 mm <sup>-1</sup>                      |                       |
| F(000)                            | 696                                         |                       |
| Crystal size                      | 0.15 x 0.10 x 0.10 mm <sup>3</sup>          |                       |
| Crystal color/habit               | colorless prism                             |                       |
| Theta range for data collection   | 4.89 to 68.34°.                             |                       |
| Index ranges                      | -8<=h<=12, -14<=k<=14, -16<=l<=16           |                       |
| Reflections collected             | 23485                                       |                       |
| Independent reflections           | 3050 [R(int) = 0.0161]                      |                       |
| Completeness to theta = 67.00°    | 99.8 %                                      |                       |
| Absorption correction             | Semi-empirical from equivalents             |                       |
| Max. and min. transmission        | 0.9269 and 0.8931                           |                       |
| Refinement method                 | Full-matrix least-squares on F <sup>2</sup> |                       |
| Data / restraints / parameters    | 3050 / 0 / 220                              |                       |
| Goodness-of-fit on F <sup>2</sup> | 1.058                                       |                       |
| Final R indices [I>2sigma(I)]     | R1 = 0.0261, wR2 = 0.0697                   |                       |
| R indices (all data)              | R1 = 0.0263, wR2 = 0.0699                   |                       |
| Absolute structure parameter      | -0.04(13)                                   |                       |

# XI. HPLC traces

Table 4, Entry 10

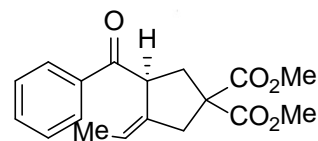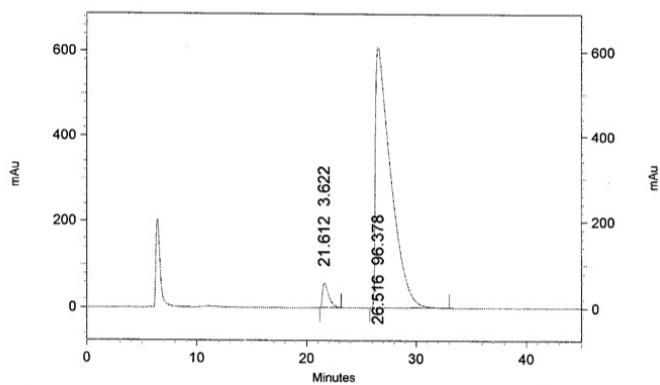

1: 244 nm,  
4 nm Results

| Pk # | Retention Time | Area Percent | Lambda Max |
|------|----------------|--------------|------------|
| 1    | 21.612         | 3.622        | 203        |
| 2    | 26.516         | 96.378       | 204        |

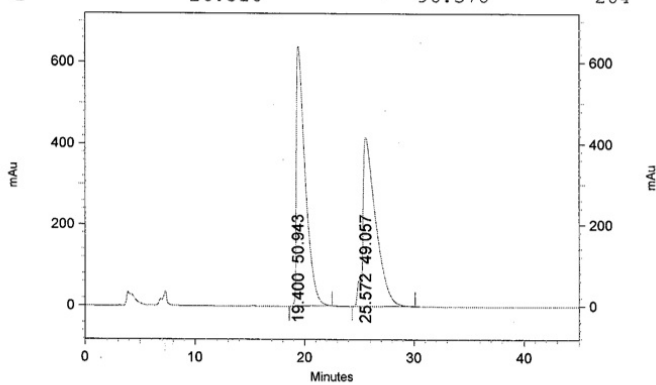

1: 243 nm,  
4 nm Results

| Pk # | Retention Time | Area Percent | Lambda Max |
|------|----------------|--------------|------------|
| 1    | 19.400         | 50.943       | 204        |
| 2    | 25.572         | 49.057       | 203        |

Table 5, Entry 1

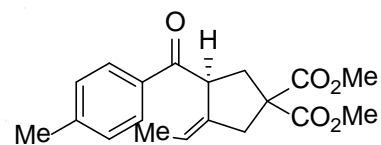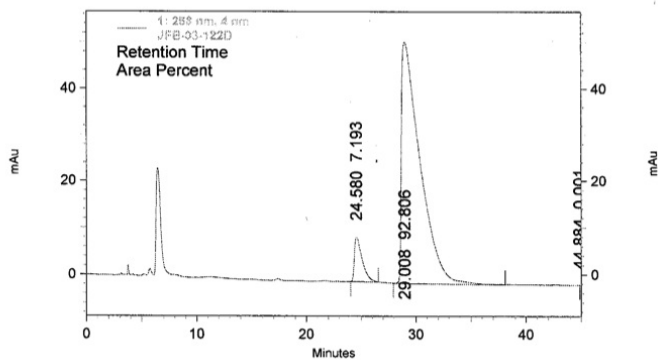

1: 268 nm,  
4 nm Results

| Pk # | Retention Time | Area Percent | Lambda Max |
|------|----------------|--------------|------------|
| 1    | 24.580         | 7.193        | 204        |
| 2    | 29.008         | 92.806       | 204        |
| 3    | 44.884         | 0.001        | 483        |

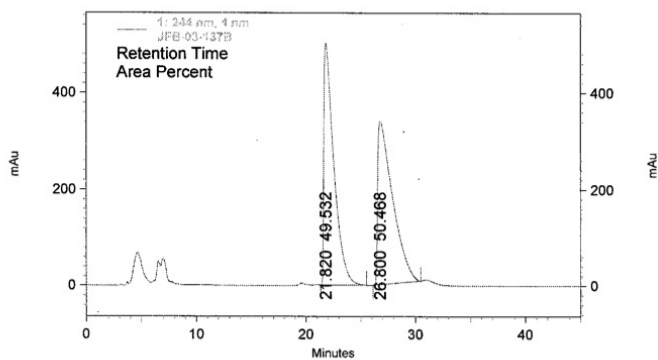

1: 244 nm,  
4 nm Results

| Pk # | Retention Time | Area Percent | Lambda Max |
|------|----------------|--------------|------------|
| 1    | 21.820         | 49.532       | 204        |
| 2    | 26.800         | 50.468       | 204        |

Table 5, Entry 2

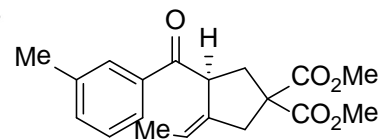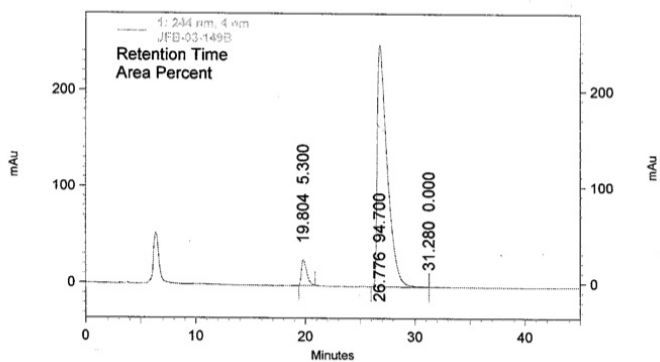

1: 244 nm,  
4 nm Results

| Pk # | Retention Time | Area Percent | Lambda Max |
|------|----------------|--------------|------------|
| 1    | 19.804         | 5.300        | 205        |
| 2    | 26.776         | 94.700       | 205        |
| 3    | 31.280         | 0.000        | 483        |

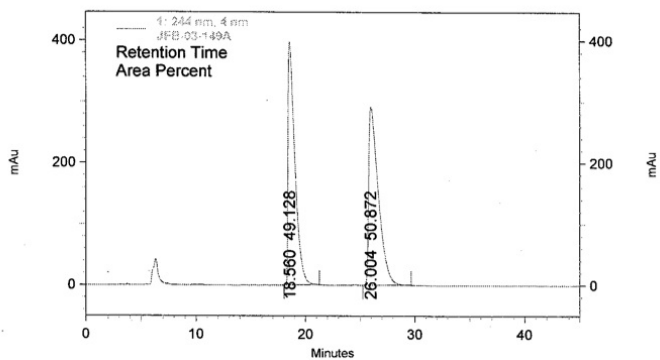

1: 244 nm,  
4 nm Results

| Pk # | Retention Time | Area Percent | Lambda Max |
|------|----------------|--------------|------------|
| 1    | 18.560         | 49.128       | 205        |
| 2    | 26.004         | 50.872       | 205        |



Table 5, Entry 3

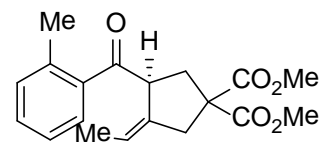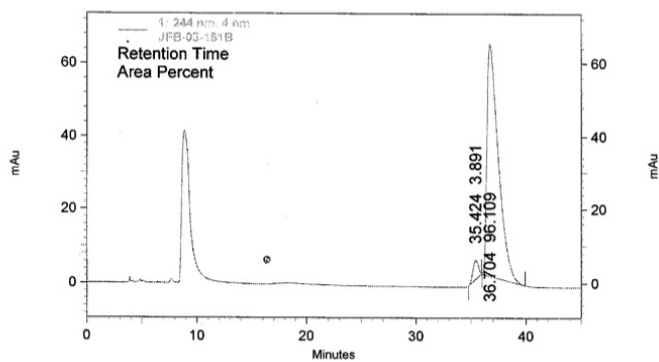

1: 244 nm,  
4 nm Results

| Pk # | Retention Time | Area Percent | Lambda Max |
|------|----------------|--------------|------------|
| 1    | 35.424         | 3.891        | 211        |
| 2    | 36.704         | 96.109       | 206        |

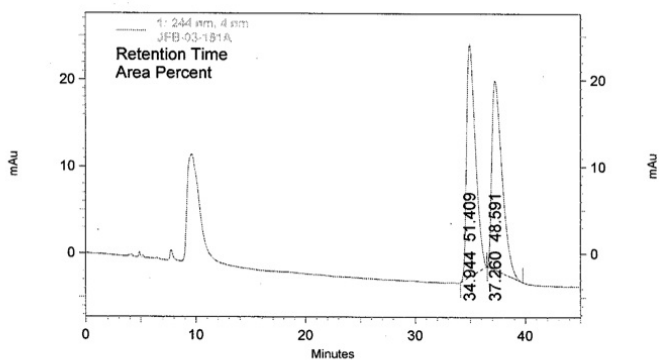

1: 244 nm,  
4 nm Results

| Pk # | Retention Time | Area Percent | Lambda Max |
|------|----------------|--------------|------------|
| 1    | 34.944         | 51.409       | 207        |
| 2    | 37.260         | 48.591       | 207        |

Table 5, Entry 4

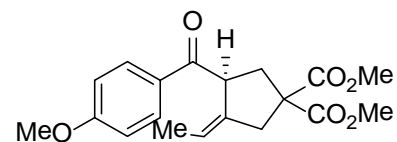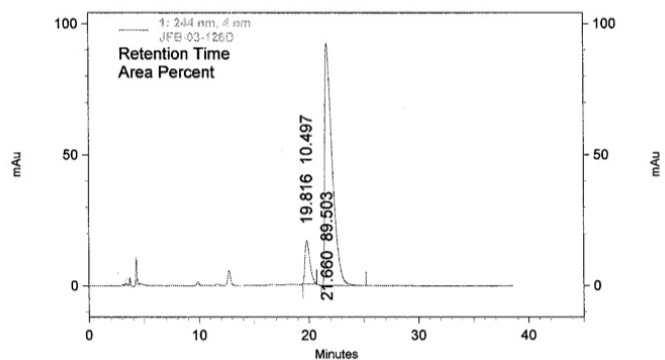

1: 244 nm,  
4 nm Results

| Pk # | Retention Time | Area Percent | Lambda Max |
|------|----------------|--------------|------------|
| 1    | 19.816         | 10.497       | 202        |
| 2    | 21.660         | 89.503       | 200        |

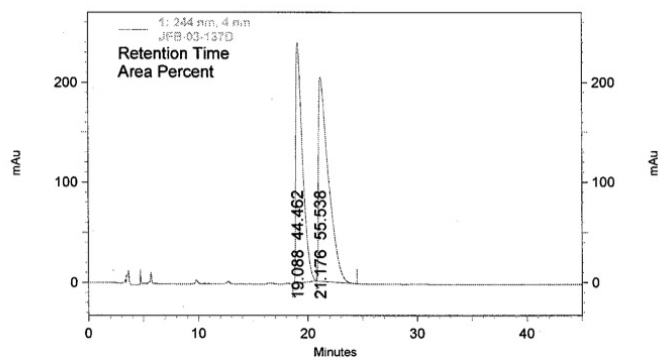

1: 244 nm,  
4 nm Results

| Pk # | Retention Time | Area Percent | Lambda Max |
|------|----------------|--------------|------------|
| 1    | 19.088         | 44.462       | 191        |
| 2    | 21.176         | 55.538       | 267        |

Table 5, Entry 5

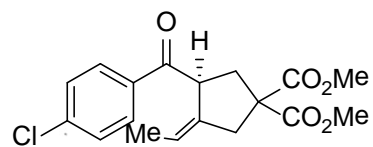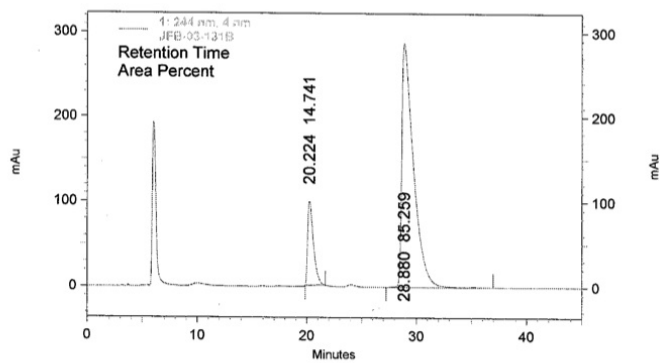

1: 244 nm,  
4 nm Results

| Pk # | Retention Time | Area Percent | Lambda Max |
|------|----------------|--------------|------------|
| 1    | 20.224         | 14.741       | 203        |
| 2    | 28.880         | 85.259       | 204        |

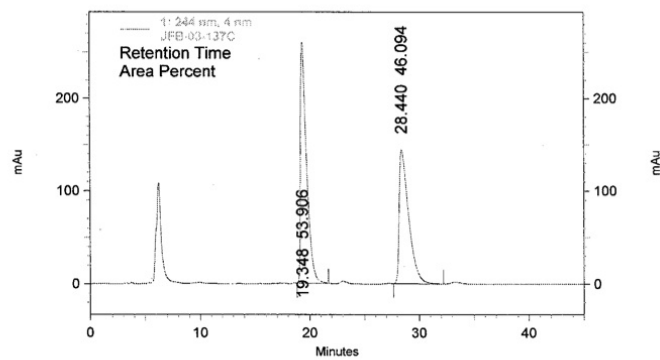

1: 244 nm,  
4 nm Results

| Pk # | Retention Time | Area Percent | Lambda Max |
|------|----------------|--------------|------------|
| 1    | 19.348         | 53.906       | 205        |
| 2    | 28.440         | 46.094       | 205        |

Table 5, Entry 6

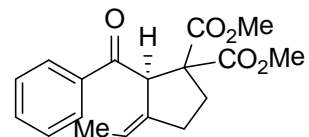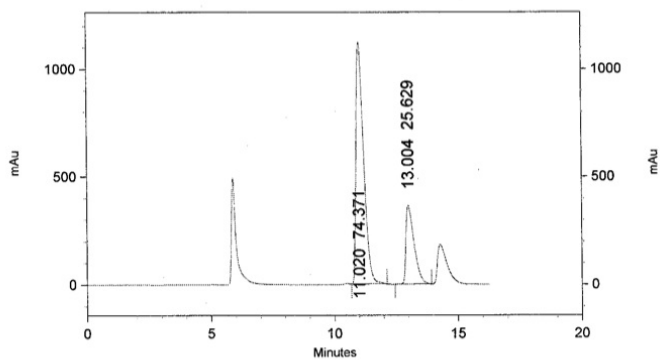

1: 244 nm,  
4 nm Results

| Pk # | Retention Time | Area Percent | Lambda Max |
|------|----------------|--------------|------------|
| 1    | 11.020         | 74.371       | 193        |
| 2    | 13.004         | 25.629       | 204        |

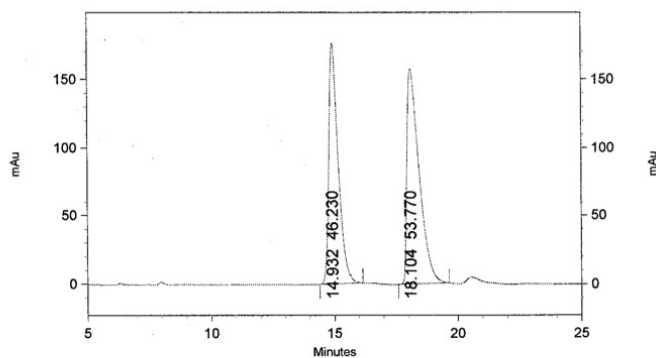

1: 244 nm,  
4 nm Results

| Pk # | Retention Time | Area Percent | Lambda Max |
|------|----------------|--------------|------------|
| 1    | 14.932         | 46.230       | 204        |
| 2    | 18.104         | 53.770       | 204        |

Table 6, Entry 9

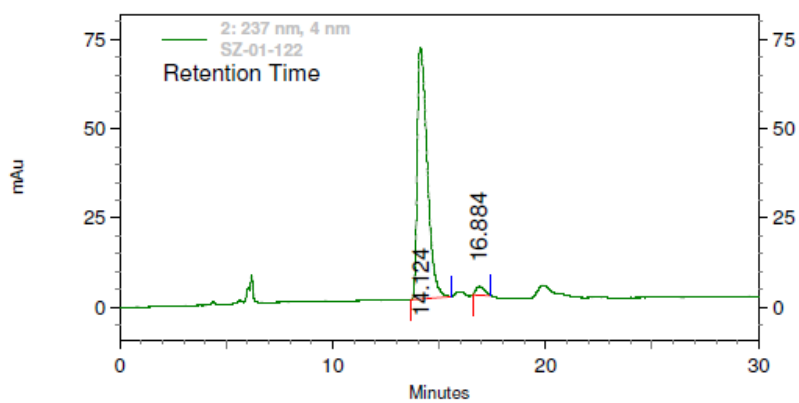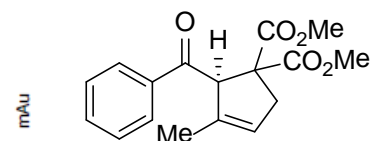

2: 237 nm, 4 nm Results

| Retention Time | Area    | Area Percent | Lambda Max |
|----------------|---------|--------------|------------|
| 14.124         | 2304225 | 97.082       | 205        |
| 16.884         | 69261   | 2.918        | 204        |

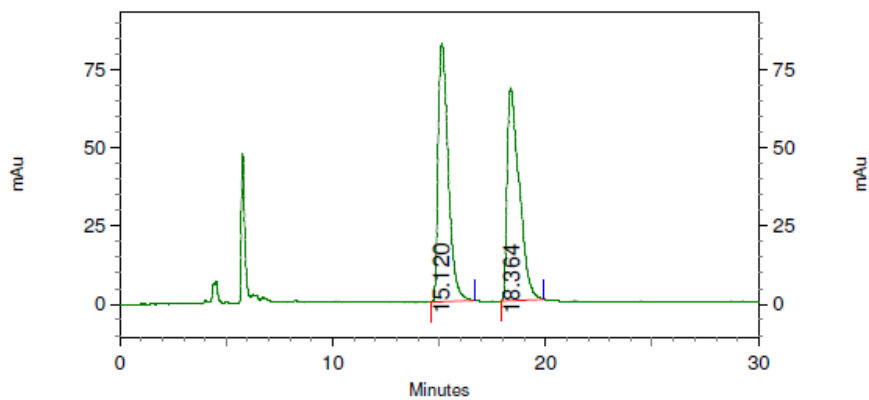

2: 237 nm, 4 nm Results

| Retention Time | Area    | Area Percent | Lambda Max |
|----------------|---------|--------------|------------|
| 15.120         | 2732760 | 50.309       | 204        |
| 18.364         | 2699192 | 49.691       | 204        |

Table 7, Entry 1

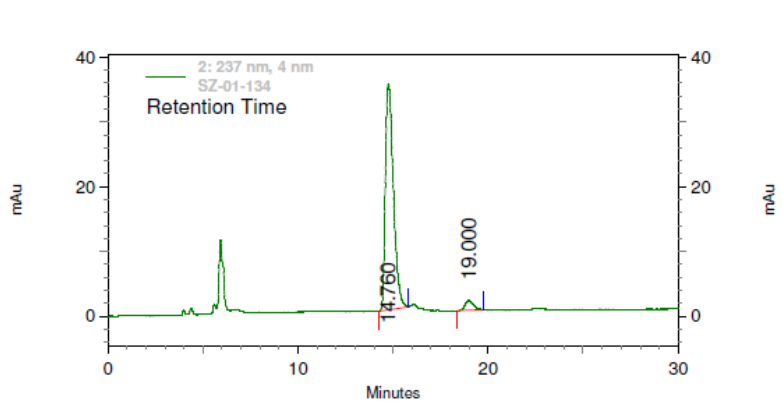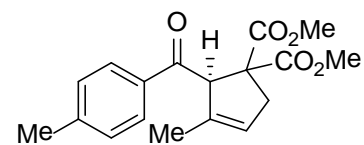

2: 237 nm, 4  
nm Results

| Retention Time | Area    | Area Percent | Lambda Max |
|----------------|---------|--------------|------------|
| 14.760         | 1018387 | 95.733       | 206        |
| 19.000         | 45388   | 4.267        | 209        |

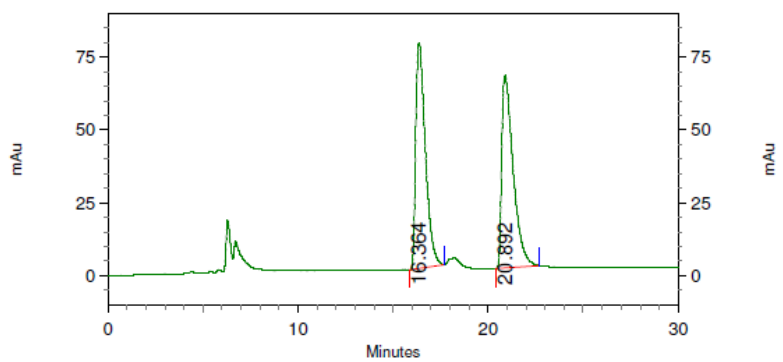

2: 237 nm, 4  
nm Results

| Retention Time | Area    | Area Percent | Lambda Max |
|----------------|---------|--------------|------------|
| 16.364         | 2701430 | 49.564       | 206        |
| 20.892         | 2748968 | 50.436       | 206        |

Table 7, Entry 2

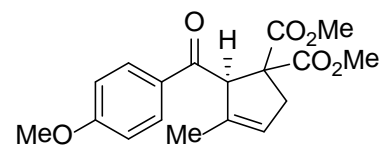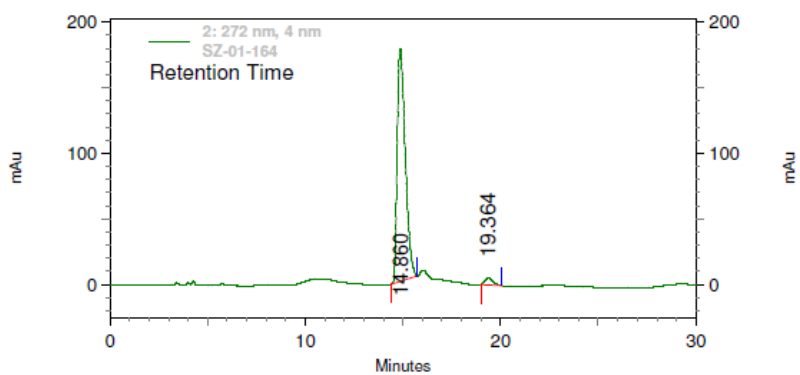

2: 272 nm, 4  
nm Results

| Retention Time | Area    | Area Percent | Lambda Max |
|----------------|---------|--------------|------------|
| 14.860         | 5070748 | 96.970       | 271        |
| 19.364         | 158454  | 3.030        | 224        |

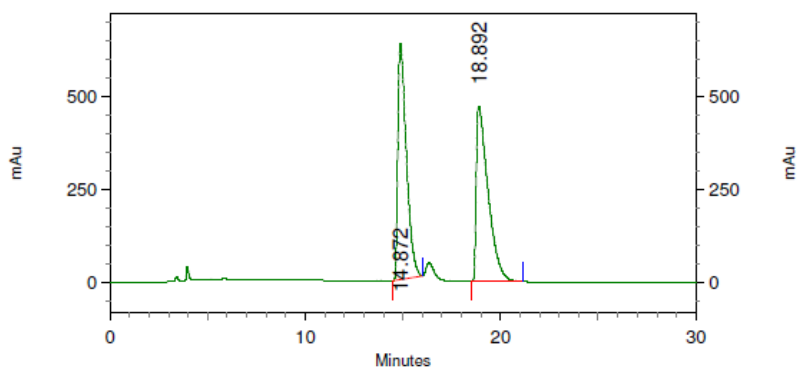

2: 272 nm, 4  
nm Results

| Retention Time | Area     | Area Percent | Lambda Max |
|----------------|----------|--------------|------------|
| 14.872         | 19198107 | 49.197       | 271        |
| 18.892         | 19824472 | 50.803       | 271        |

Table 7, Entry 3

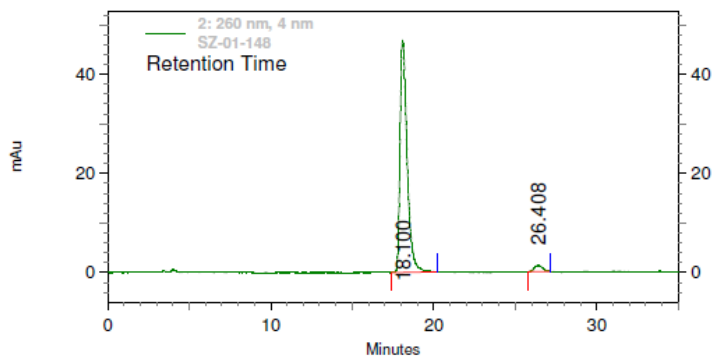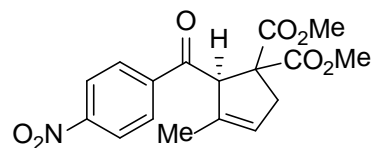

2: 260 nm, 4  
nm Results

| Retention Time | Area    | Area Percent | Lambda Max |
|----------------|---------|--------------|------------|
| 18.100         | 1413574 | 96.947       | 260        |
| 26.408         | 44522   | 3.053        | 252        |

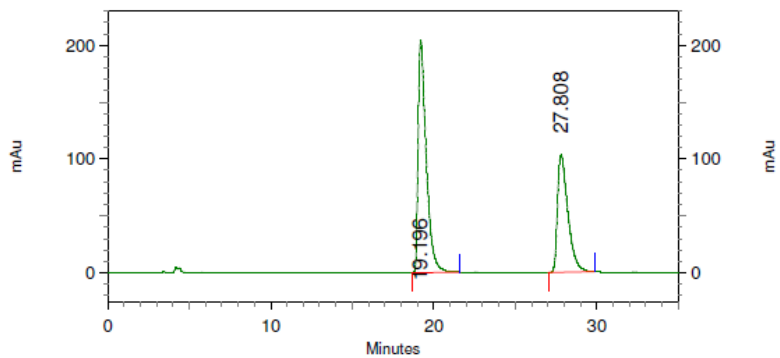

2: 260 nm, 4  
nm Results

| Retention Time | Area    | Area Percent | Lambda Max |
|----------------|---------|--------------|------------|
| 19.196         | 7053065 | 60.690       | 260        |
| 27.808         | 4568330 | 39.310       | 260        |



Table 7, Entry 4

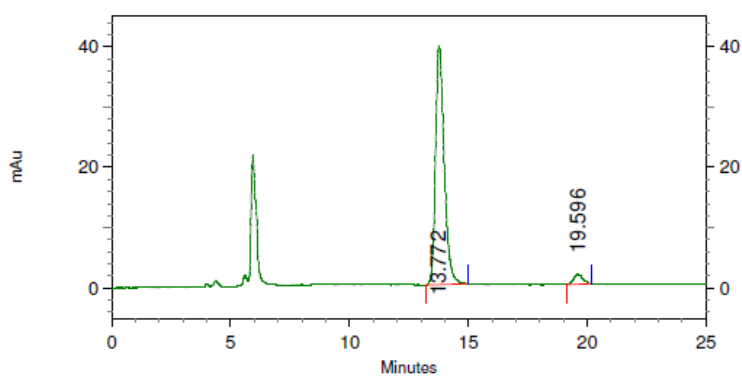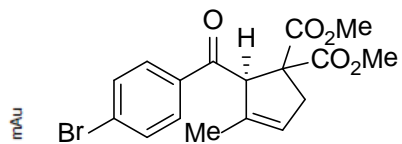

2: 237 nm, 4  
nm Results

| Retention Time | Area    | Area Percent | Lambda Max |
|----------------|---------|--------------|------------|
| 13.772         | 1005672 | 95.822       | 205        |
| 19.596         | 43846   | 4.178        | 205        |

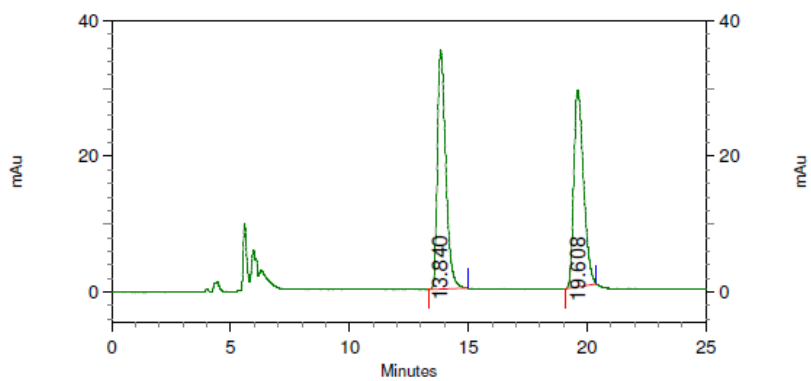

1: 237 nm, 4  
nm Results

| Retention Time | Area   | Area Percent | Lambda Max |
|----------------|--------|--------------|------------|
| 13.840         | 862909 | 51.036       | 205        |
| 19.608         | 827892 | 48.964       | 205        |

Table 7, Entry 5

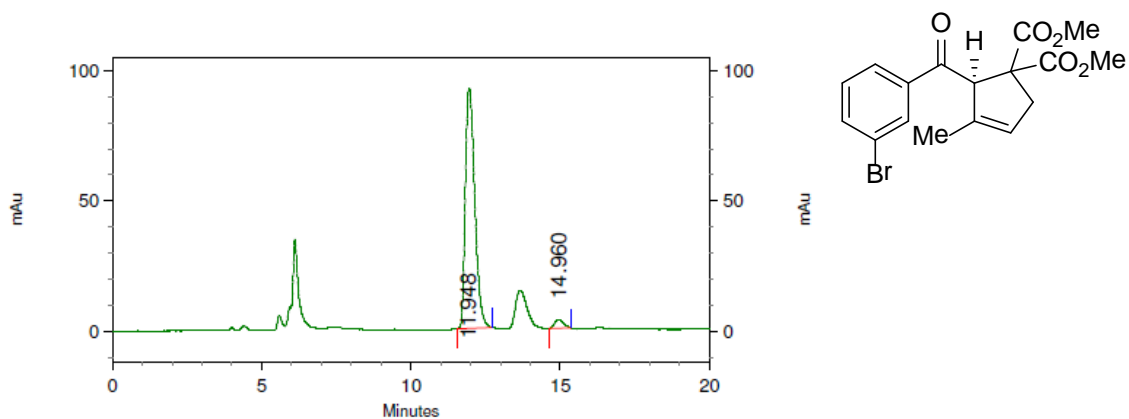

2: 237 nm, 4  
nm Results

| Retention Time | Area    | Area Percent | Lambda Max |
|----------------|---------|--------------|------------|
| 11.948         | 2014624 | 96.647       | 211        |
| 14.960         | 69897   | 3.353        | 205        |

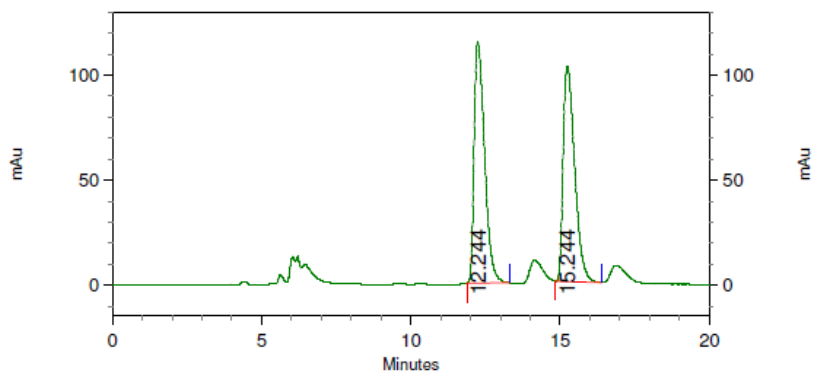

1: 237 nm, 4  
nm Results

| Retention Time | Area    | Area Percent | Lambda Max |
|----------------|---------|--------------|------------|
| 12.244         | 2814579 | 50.429       | 211        |
| 15.244         | 2766664 | 49.571       | 211        |

Table 7, Entry 6

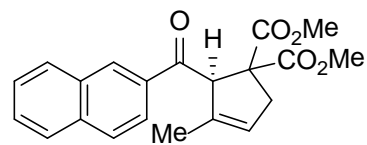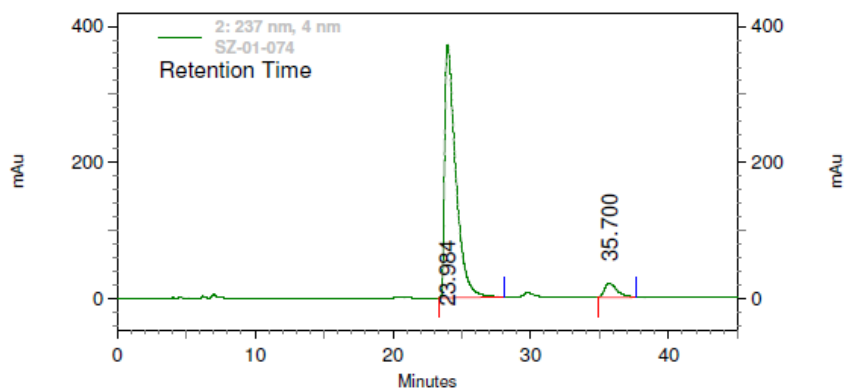

2: 237 nm, 4 nm Results

| Retention Time | Area    | Area Percent | Lambda Max |
|----------------|---------|--------------|------------|
| 14.072         | 2789661 | 94.347       | 207        |
| 18.212         | 167147  | 5.653        | 496        |

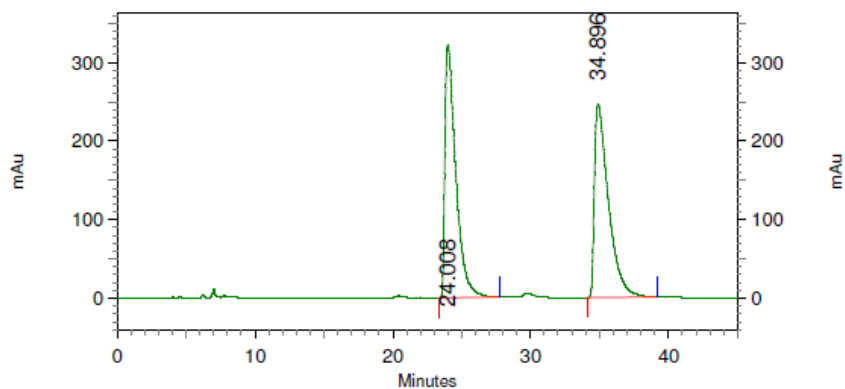

5: 237 nm, 4 nm Results

| Retention Time | Area | Area Percent | Lambda Max |
|----------------|------|--------------|------------|
|----------------|------|--------------|------------|

|        |          |        |     |
|--------|----------|--------|-----|
| 24.008 | 17497231 | 50.035 | 247 |
| 34.896 | 17472718 | 49.965 | 248 |

Table 7, Entry 7

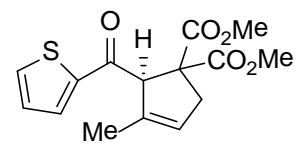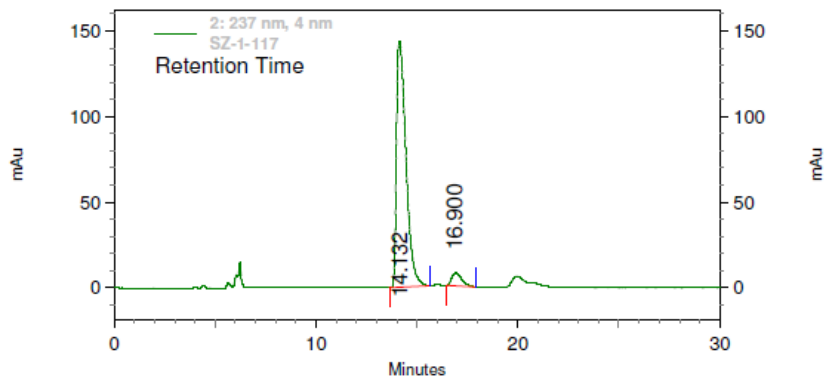

2: 237 nm, 4  
nm Results

| Retention Time | Area    | Area Percent | Lambda Max |
|----------------|---------|--------------|------------|
| 14.132         | 4722157 | 94.714       | 205        |
| 16.900         | 263544  | 5.286        | 207        |

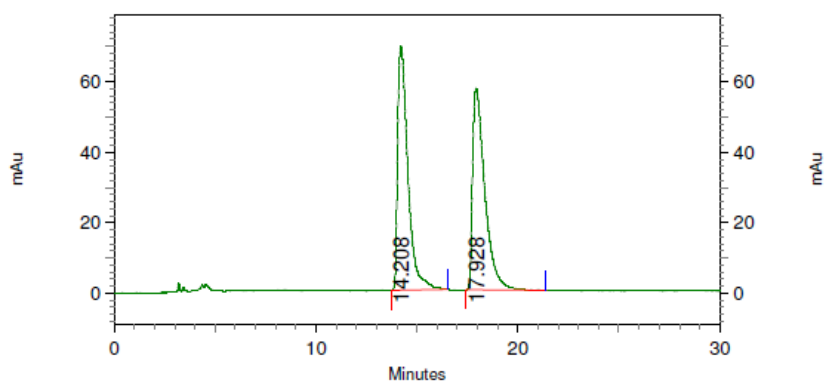

2: 257 nm, 4  
nm Results

| Retention Time | Area    | Area Percent | Lambda Max |
|----------------|---------|--------------|------------|
| 14.208         | 2452185 | 50.391       | 260        |
| 17.928         | 2414137 | 49.609       | 260        |

Table 8, Entry 4

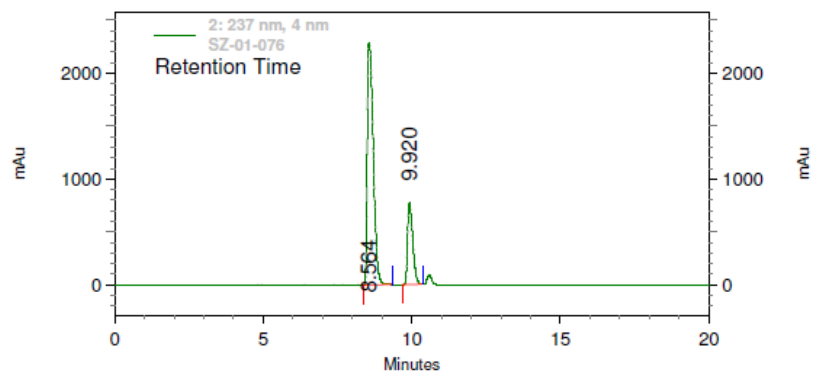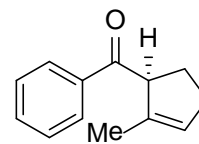

2: 237 nm, 4 nm Results

| Retention Time | Area     | Area Percent | Lambda Max |
|----------------|----------|--------------|------------|
| 8.564          | 32268288 | 77.535       | 234        |
| 9.920          | 9349316  | 22.465       | 204        |

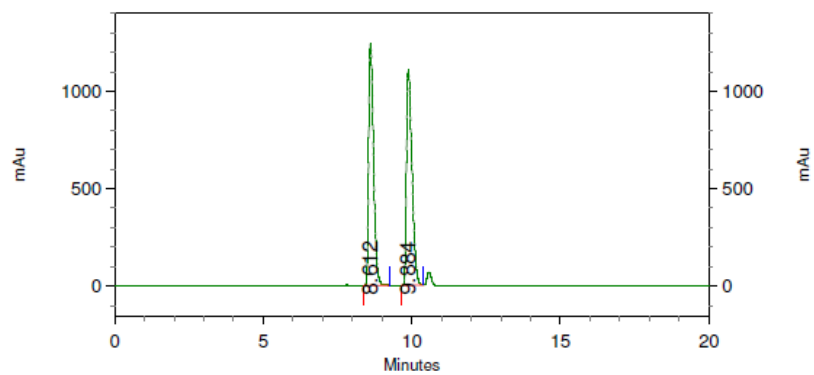

5: 237 nm, 4 nm Results

| Retention Time | Area     | Area Percent | Lambda Max |
|----------------|----------|--------------|------------|
| 8.612          | 14247847 | 50.067       | 205        |
| 9.884          | 14209891 | 49.933       | 205        |

Table 8, Entry 6

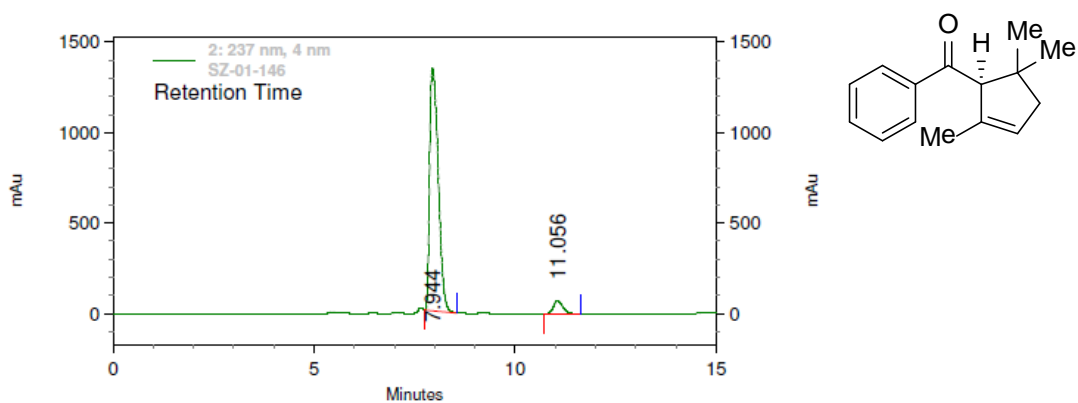

2: 237 nm, 4 nm Results

| Retention Time | Area     | Area Percent | Lambda Max |
|----------------|----------|--------------|------------|
| 7.944          | 19824686 | 94.713       | 205        |
| 11.056         | 1106587  | 5.287        | 205        |

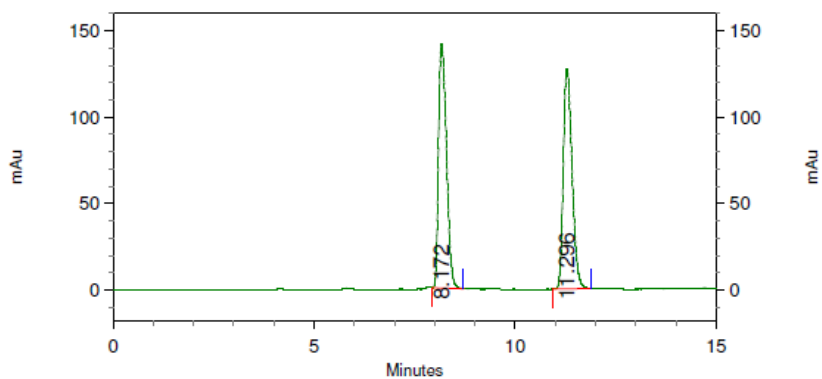

2: 237 nm, 4 nm Results

| Retention Time | Area    | Area Percent | Lambda Max |
|----------------|---------|--------------|------------|
| 8.172          | 1933862 | 50.021       | 202        |
| 11.296         | 1932246 | 49.979       | 202        |

Table 9, Entry 2

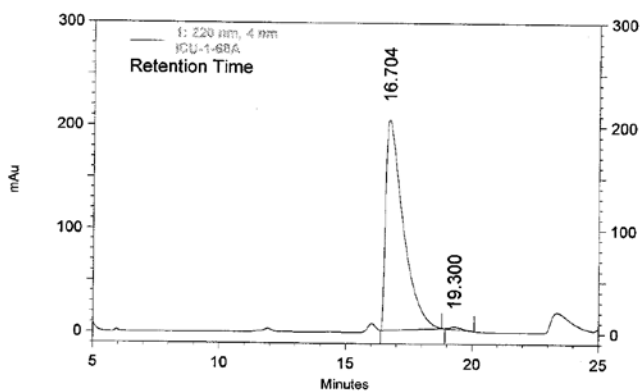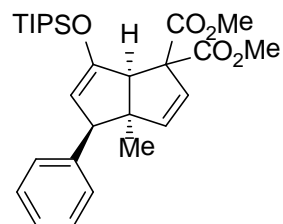

1: 220 nm, 4 nm Results

| Retention Time | Area    | Area Percent | Lam |
|----------------|---------|--------------|-----|
| 16.704         | 9784492 | 99.222       |     |
| 19.300         | 76740   | 0.778        |     |

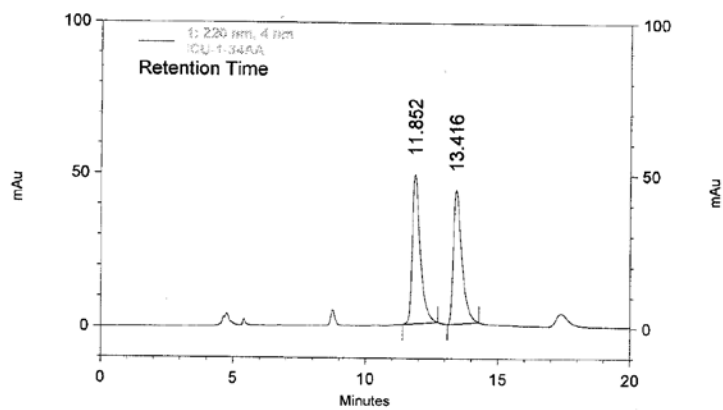

1: 220 nm, 4 nm Results

| Retention Time | Area    | Area Percent | Lam |
|----------------|---------|--------------|-----|
| 11.852         | 1027361 | 51.231       |     |
| 13.416         | 977994  | 48.769       |     |

Table 10, Entry 1

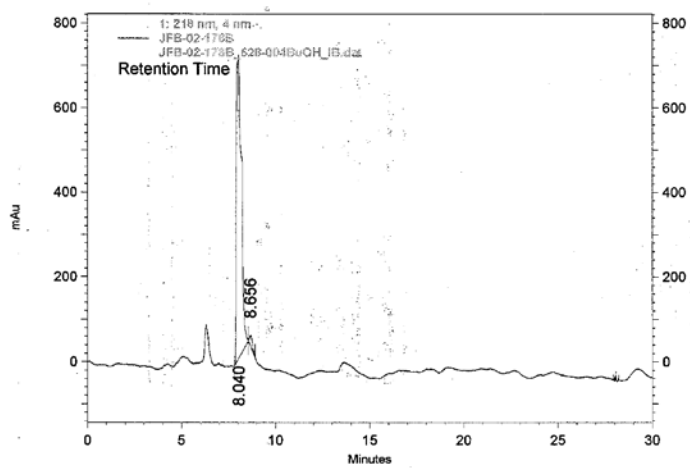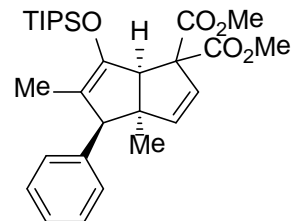

1: 218 nm, 4  
nm Results

| Retention Time | Area     | Area Percent | Lambda Max |
|----------------|----------|--------------|------------|
| 8.040          | 13186301 | 97.777       | 221        |
| 8.656          | 299833   | 2.223        | 221        |

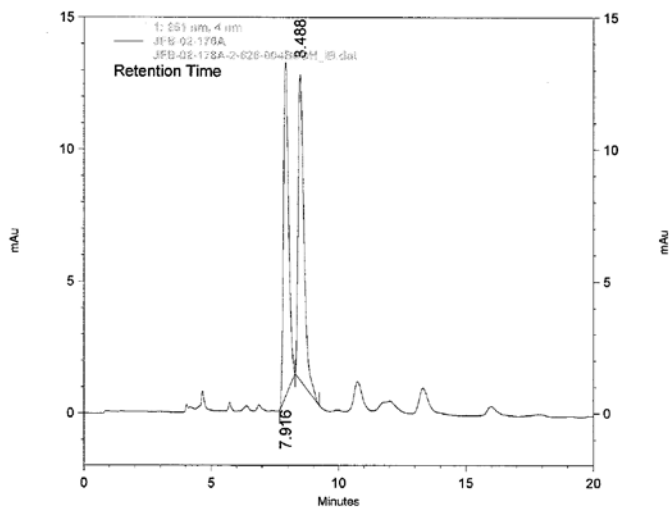

1: 261 nm, 4  
nm Results

| Retention Time | Area   | Area Percent | Lambda Max |
|----------------|--------|--------------|------------|
| 7.916          | 176141 | 48.981       | 219        |
| 8.488          | 183468 | 51.019       | 219        |



Table 10, Entry 2

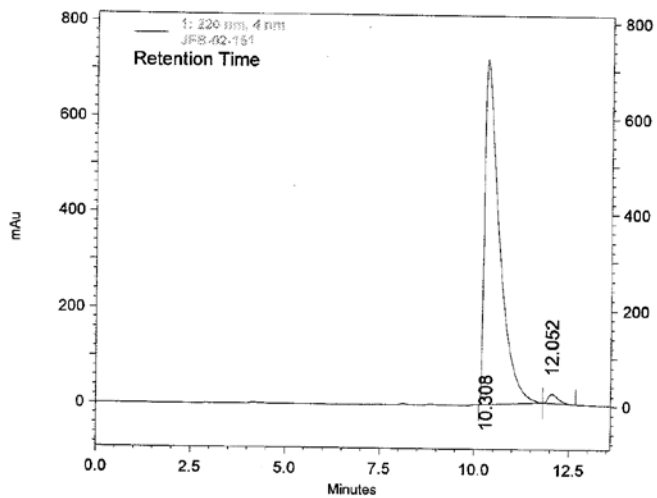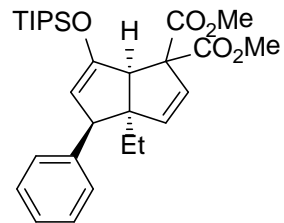

1: 220 nm, 4 nm Results

| Retention Time | Area     | Area Percent | Lamb |
|----------------|----------|--------------|------|
| 10.308         | 19540283 | 98.140       |      |
| 12.052         | 370325   | 1.860        |      |

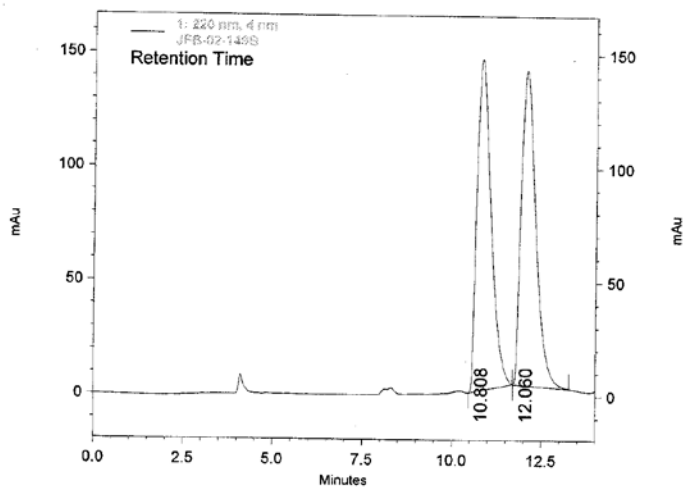

1: 220 nm, 4 nm Results

| Retention Time | Area    | Area Percent | Lamb |
|----------------|---------|--------------|------|
| 10.808         | 3975347 | 50.354       |      |
| 12.060         | 3919375 | 49.646       |      |

Table 10, Entry 3

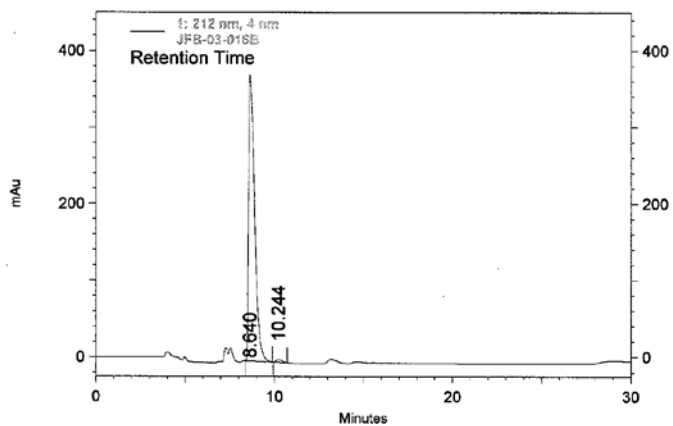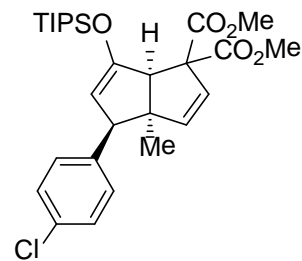

1: 212 nm, 4 nm Results

| Retention Time | Area    | Area Percent | Lambd |
|----------------|---------|--------------|-------|
| 8.640          | 8842660 | 99.048       |       |
| 10.244         | 84999   | 0.952        |       |

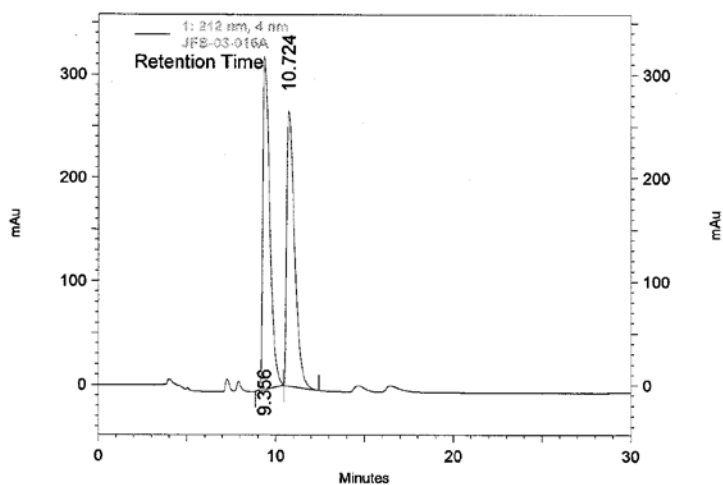

1: 212 nm, 4 nm Results

| Retention Time | Area    | Area Percent | Lambd |
|----------------|---------|--------------|-------|
| 9.356          | 8808118 | 51.612       |       |
| 10.724         | 8257904 | 48.388       |       |

Table 10, Entry 4

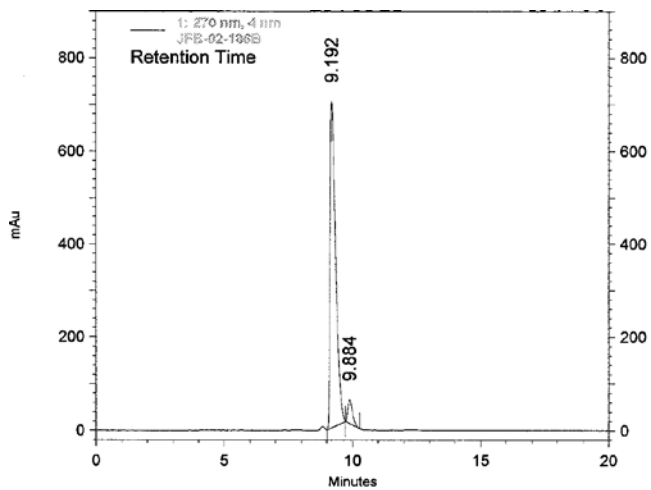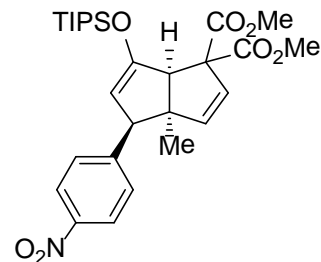

1: 270 nm, 4 nm Results

| Retention Time | Area     | Area Percent | Lam |
|----------------|----------|--------------|-----|
| 9.192          | 10598415 | 94.243       |     |
| 9.884          | 647438   | 5.757        |     |

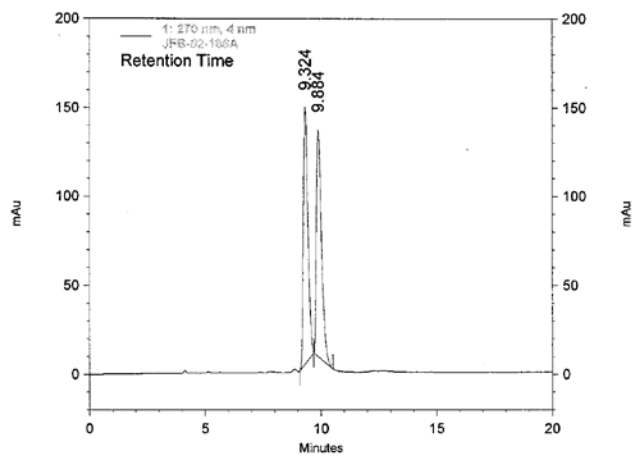

1: 270 nm, 4 nm Results

| Retention Time | Area    | Area Percent | Lam |
|----------------|---------|--------------|-----|
| 9.324          | 1987724 | 50.212       |     |
| 9.884          | 1970915 | 49.788       |     |

Table 10, Entry 5

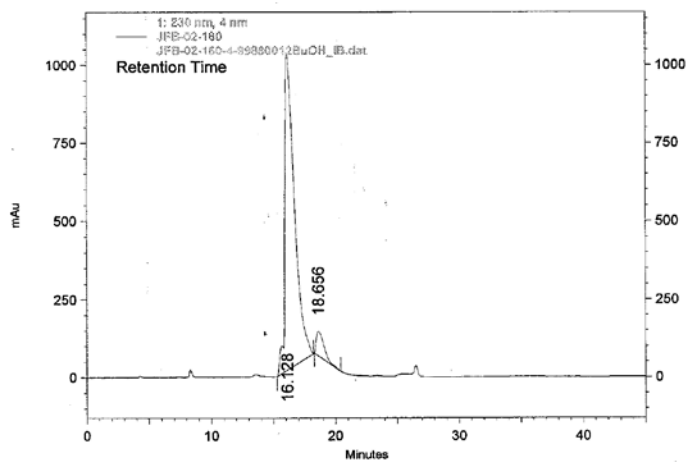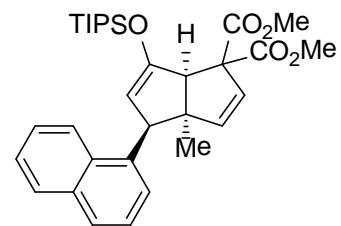

1: 230 nm, 4 nm Results

| Retention Time | Area      | Area Percent | Lambda Max |
|----------------|-----------|--------------|------------|
| 16.128         | ,55493849 | 94.107       | 222        |
| 18.656         | 3474743   | 5.893        | 224        |

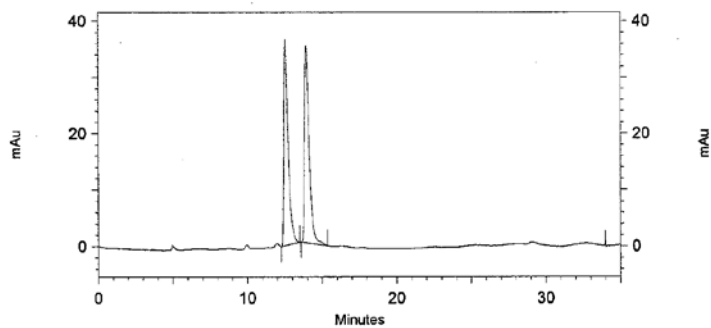

1: 230 nm, 4 nm Results

| Retention Time | Area   | Area Percent | Lam |
|----------------|--------|--------------|-----|
| 12.548         | 730461 | 49.312       |     |
| 13.944         | 750851 | 50.688       |     |

Table 10, Entry 6

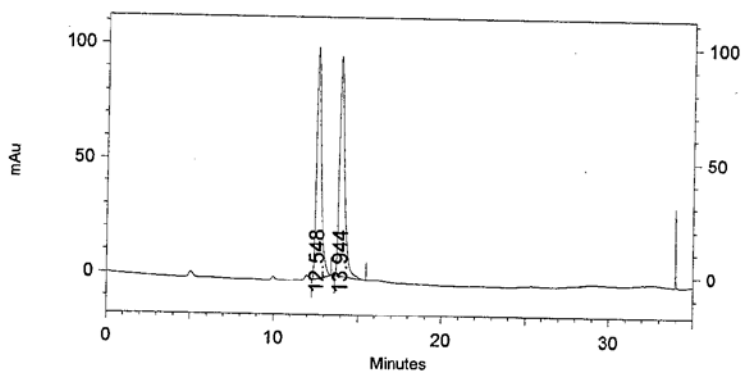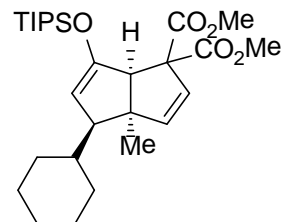

1: 211 nm, 4  
nm Results

| Retention Time | Area    | Area Percent | Lambda Max |
|----------------|---------|--------------|------------|
| 12.548         | 2014209 | 49.484       | 212        |
| 13.944         | 2056214 | 50.516       | 212        |

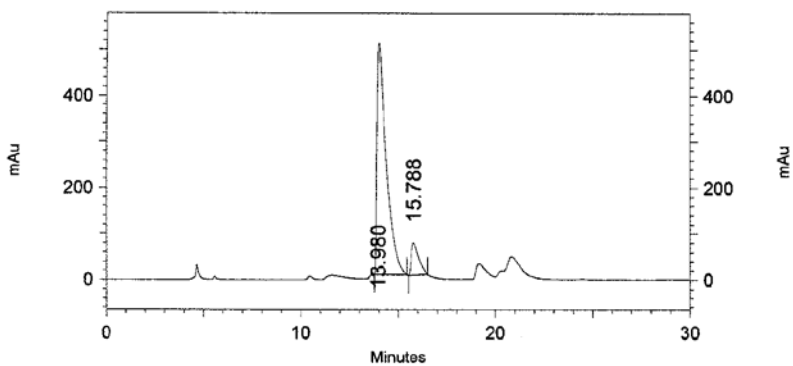

1: 211 nm, 4  
nm Results

| Retention Time | Area     | Area Percent | Lam |
|----------------|----------|--------------|-----|
| 13.980         | 17032659 | 90.142       |     |
| 15.788         | 1862619  | 9.858        |     |

Table 10, Entry 7

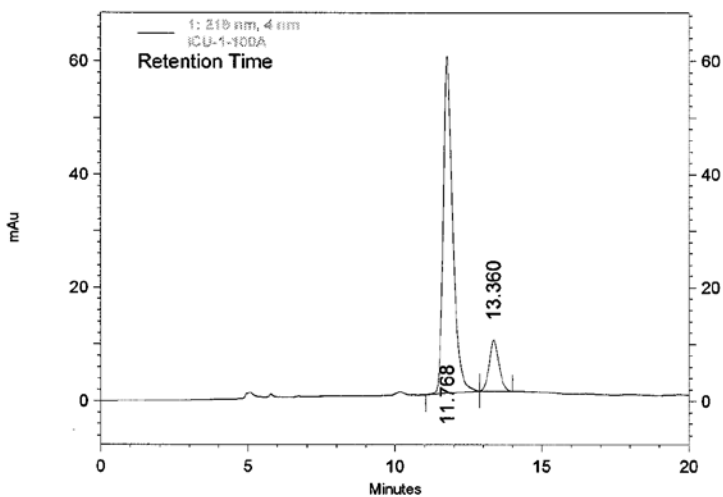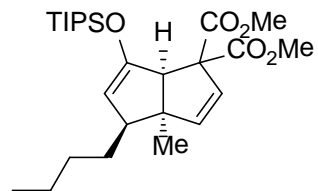

1: 219 nm, 4 nm Results

| Retention Time | Area    | Area Percent | Lambda |
|----------------|---------|--------------|--------|
| 11.768         | 1337582 | 86.559       |        |
| 13.360         | 207708  | 13.441       |        |

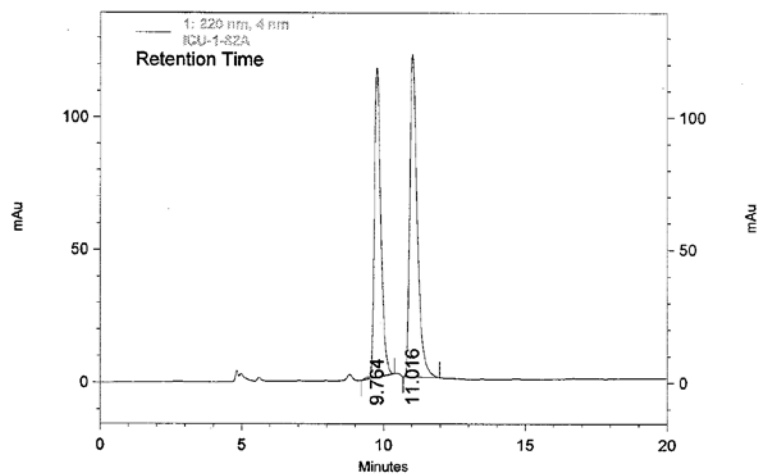

1: 220 nm, 4 nm Results

| Retention Time | Area    | Area Percent | Lambda |
|----------------|---------|--------------|--------|
| 9.764          | 1840727 | 45.311       |        |
| 11.016         | 2221676 | 54.689       |        |
